# Supplementary material for: Integration of Transcriptome, Proteome and Metabolism Data Reveals the Alkaloids Biosynthesis in Macleaya cordata and Macleaya microcarpa
Source: PLoS One. 2013 Jan 9;8(1):e53409. doi: 10.1371/journal.pone.0053409 (PMC3541140; doi:10.1371/journal.pone.0053409)
Supplement: File S3 — Complete list of all proteins identified in M. cordata and M. microcarpa. (XLSX) [file pone.0053409.s013.xlsx]

## Sheet: public
id	prot_hit_number	prot_acc	prot_desc	prot_seq	prot_score	prot_mass	spectra number	unique peptide number	114/113	significance	115/113	significance	116/113	significance	117/113	significance	118/113	significance	119/113	significance	121/113	significance
2	2	gi|122166028|sp|Q09G39.1|ATPB_PLAOC	RecName: Full=ATP synthase subunit beta, chloroplastic; AltName: Full=ATP synthase F1 sector subunit beta; AltName: Full=F-ATPase subunit beta >gi|114054391|gb|ABI49785.1| ATP synthase CF1 beta subunit [Platanus occidentalis] >gi|114329753|ref|YP_74	MRINPTTSGPGVSALEEKNLGRIAQIIGPVLDVAFPPGKMPNIYNALVVKGRDTVGQQINVTCEVQQLLGNNRVRAVAMSATDGLTRGMEVIDTGAPLSVPVGGATLGRIFNVLGEPVDNLGPVDTRTTSPIHRSAPAFIQLDTKLSIFETGIKVVDLLAPYRRGGKIGLFGGAGVGKTVLIMELINNIAKAHGGVSVFGGVGERTREGNDLYMEMKESGVINEQNIAESKVALVYGQMNEPPGARMRVGLTALTMAEYFRDVNEQDVLLFIDNIFRFVQAGSEVSALLGRMPSAVGYQPTLSTEMGSLQERITSTKEGSITSIQAVYVPADDLTDPAPATTFAHLDATTVLSRGLAAKGIYPAVDPLDSTSTMLQPRIVGEEHYETAQRVKQTLQRYK…	4098	60033	183	1	---		---		---		---		---		---		---
3	4	gi|37720941|gb|AAN32473.1|	ATP synthase beta subunit [Scheuchzeria palustris]	GVSTLEEKNLGRIAQIIGPVLDVAFPPGRMPNIYNALVVKGRDTAGQQINVTCEVQQLLGNNRVRAVAMSATEGLTRGMEVIDTGAPLSVPVGGATLGRIFNVLGEPVDNLGPVDTRTTSPIHRSAPAFIQLDTKLSIFETGIKVVDLLAPYRRGGKIGLFGGAGVGKTVLIMELINNIAKAHGGVSVFGGVGERTREGNDLYMEMKESGVINEQNIAESKVALVYGQMNEPPGARMRVGLTALTMAEYFRDVNEQDVLLFIDNIFRFVQAGSEVSALLGRMPSAVGYQPTLSTEMGSLQERITSTKEGSITSIQAVYVPADDLTDPAPATTFAHLDATTVLSRGLAAKGIYPAVDPLDSTSTMLQPRIVGEEHYETAQRVKQTSQRYKELQDIIAILG…	3990	56969	171	4	---		4.17		5.409		3.171		3.072		11.618		4.182
4	5	gi|13236786|gb|AAK14698.1|	ATP synthase beta subunit [Burretiokentia hapala]	MRTNPTTSSPVVSTLEEKNLGRIAQIIGPVLDVVFPPGKMPNIYNALVVKGRDTVGQQINVTCEVQQLLGNNRVRAVAMSATDGLMRGMEVIDTGAPLSVPVGGATLGRIFNVLGEPVDNLGPVDTRTTSPIHRSAPAFIQLDTKLSIFETGIKVVDLLAPYXRGGKIGLFGGAGVGKTVLIMELINNIAKAHGGVSVFGGVGERTREGNDLYMEMKESGVINEKNIAESKVALVYGQMNEPPGARMRVGLTALTMAEYFRDVNEQDVLLFIDNIFRFVQAGSEVSALLGRMPSAVGYQPTLSTEMGSLQERITSTKDGSITSIQAVYVPADDLTDPAPATTFAHLDATTVLSRVLAAKGIYPAVDPLDSTSTMLQPRIVGEEHYETAQRVKQTSQRYK…	3981	60442	170	5	---		---		---		---		---		---		---
5	7	gi|147838606|emb|CAN69512.1|	hypothetical protein [Vitis vinifera]	MASRRLLSSLIRSSVRRYSAKSPAISPRTPSPYPSSRPSPKGFLLNRAVDYATSAAAAASPPPPPPAKGAGPSGKITDEFTGAGAIGSVCQVIGAVVDVRFDEGLPPILTALEVLDNSIRLVLEVAQHLGENMVRTIAMDGTEGLVRGQRVLNTGSPITVPVGRATLGRIINVIGEPIDERGEIKTDHFLPIHREAPSFVDQATEQQILVTGIKVVDLLAPYQRGGKIGLFGGAGVGKTVLIMELINNVAKAHGGFSVFAGVGERTREGNDLYREMIESGVIKLGDKQASFSESKCALVYGQMNEPPGARARVGLTGLTVAEHFRDAEGQDVLLFIDNIFRFTQANSEVSALLGRIPSAVGYQPTLATDLGGLQERITTTKKGSITSVQAIYVPADDLT…	3616	67609	140	20	3.192	*	1.537		6.935		2.998	*	1.002		1.671		0.236	*
5	7	gi|225424142|ref|XP_002283951.1|	PREDICTED: hypothetical protein [Vitis vinifera]	MASRRLLSSLLRSSVRRYSAKSPAISPRTPSPYPSSRPSPKGFLLNRAVDYATSAAAAASPPPPPPAKGAGPSGKITDEFTGAGAIGSVCQVIGAVVDVRFDEGLPPILTALEVLDNSIRLVLEVAQHLGENMVRTIAMDGTEGLVRGQRVLNTGSPITVPVGRATLGRIINVIGEPIDERGEIKTDHFLPIHREAPSFVDQATEQQILVTGIKVVDLLAPYQRGGKIGLFGGAGVGKTVLIMELINNVAKAHGGFSVFAGVGERTREGNDLYREMIESGVIKLGDKQSESKCALVYGQMNEPPGARARVGLTGLTVAEHFRDAEGQDVLLFIDNIFRFTQANSEVSALLGRIPSAVGYQPTLATDLGGLQERITTTKKGSITSVQAIYVPADDLTDPA…	3616	67304	140	20
5	7	gi|225456079|ref|XP_002280824.1|	PREDICTED: hypothetical protein [Vitis vinifera]	MASRKLLSSLLRTSVRRPISRSVLSNPRSPLPRPSPVGHLLARAANYASSASAAAPAASTPSAAKGAGPSGKITDEFTGAGAIGQVCQVIGAVVDVRFDEGLPPILTALEVLDNSIRLVLEVAQHLGENMVRTIAMDGTEGLVRGQRVLNTGSPITVPVGRATLGRIINVIGEPIDERGDIKTDHFLPIHREAPSFVDQATEQQILVTGIKVVDLLAPYQRGGKIGLFGGAGVGKTVLIMELINNVAKAHGGFSVFAGVGERTREGNDLYREMIESGVIKLGEKQSESKCALVYGQMNEPPGARARVGLTGLTVAEHFRDAEGQDVLLFIDNIFRFTQANSEVSALLGRIPSAVGYQPTLATDLGGLQERITTTKKGSITSVQAIYVPADDLTDPAPAT…	3616	66558	140	20
6	10	gi|8134570|sp|Q42699.1|METE_CATRO	RecName: Full=5-methyltetrahydropteroyltriglutamate--homocysteine methyltransferase; AltName: Full=Cobalamin-independent methionine synthase isozyme; AltName: Full=Vitamin-B12-independent methionine synthase isozyme >gi|257676157|emb|CBD28050.1| unn	MASHIVGYPRMGPKRELKFALESFWDKKSSAEDLQKVAADLRSSIWKQMADAGIKYIPSNTFSYYDQVLDTATMLGAVPPRYNFAGGEIGFDTYFSMARGNASVPAMEMTKWFDTNYHYIVPELGPEVNFSYASHKAVNEYKEAKELGVDTVPVLVGPVTFLLLSKPAKGVEKTFPLLSLLDKILPVYKEVIGELKAAGASWIQFDEPTLVLDLESHQLEAFTKAYSELESTLSGLNVIVETYFADIPAETYKILTALKGVTGFGFDLVRGAKTLDLIKGGFPSGKYLFAGVVDGRNIWANDLAASLSTLQSLEGIVGKDKLVVSTSCSLLHTAVDLVNEPKLDKEIKSWLAFAAQKVVEVNALAKALAGEKDEAFFSENAAAQASRKSSPRVTNQAVQ…	3355	102429	113	22	2.976		1.887		2.139		11.239		0.303		1.828		1.29	*
7	13	gi|123325687|gb|ABM74468.1|	ATP synthase beta subunit [Microcitrus australis]	LGHIAQIIGPVLDVAFPPGKMPNIYNALVVKGRDTVDQPINVTCEVQQLLGNNRVRAVAMSATDGLTRGMEVIDTGAPLSVPVGGVTLGRIFNVLGEPVDNLGPVDTRTTSPIHKSAPAFIQLDTRLSIFETGIKVVDLLAPYRRGGKIGLFGGAGVGKTVLIMELINNIAKAHGGVSVFGGVGERTREGXDLYMEMKESGVINDQNLSESKVALVYGQMNEPPGARMRVGLTALTMAEYFRDVNEQXVLLFIDNIFRFVQAGSEVSALLGRMPSAVGYQPTLSTEMGSLQERITSTKEGSITSIQAVYVPADDLTDPAPATTFAHLDATTVLSRGLAAKGIYPAVDPLDSTSTMLQPRIVGEEXYETAQRVKQTLQRYKELQDIIAILGLDXLSEEDR…	3109	55278	145	4	---		0.645	*	1.029		0.014	*	0.071	*	1.775	*	0.99
8	14	gi|225810599|gb|ACO34814.1|	Sal k 3 pollen allergen [Salsola kali]	MASHVVGYPRMGPKRELKFALESFWDGKSSAEDLKKVAADLRSSIWKQMADAGIKYIPSNTFAYYDQVLDTTAMLGAVPARYGFNGGEIGFDLYFSMARGNASLPAMEMTKWFDTNYHYIVPELGPEVKFAYSSHKAVDEYKEAKALGVDTVPVLVGPVSYLLLSKAAKGVEKSFPLLSLLPKILPVYKEVIAELKAAGASTIQFDEPTLVMDLESHQLKAFTDAYADLESTLSGLNVLVETYFADLTPEAYKTLVSLNGVTAFGFDLVRGTKTLDLIKSGFPSGKYLFAGVVDGRNIWANDLAASLATLQSLESIVGKDKLVVSTSCSLLHTAVDLVNETKLDDEIKSWLAFAAQKVLEVNALAKALAGQKDEAFFSANAAALASRKSSPRVTNEAVQ…	3025	100222	91	4	---		---		---		---		---		---		---
10	19	gi|14718206|gb|AAK72841.1|	ATP synthase beta subunit [Rhynchospora nervosa]	GSXVSTLEEKNLGRIAQIIGPVLDVVFPPGKMPNIYNALVVKGRDTVGQEINVTCEVQQLLGNNRVRAVAMSATXGLMRGMEVIDTGAPLSVPVGGATLGRIFNVLGEPVDNLGPVDTRTTSPIHRSAPAFIQLDTKLSIFEXGIKVVDLLAPYRRGGKIGLFGGAGVGKTVLIMELINNIARAHGGVSVFGGVGERTREGDDLYMEMKESGVINEXNLAESKVALVYGQMNEPPGARMRVGLTALTMAEYFRDVNKQDVLLFIDNIFRFVQAGSEVSALLGRMPSAVGYQPTLSTEMGTLQERITSTKKGAITSIQAVYVPADDLTDPAPATTFAHLDATTVLSRPLAAKGIYPAVSPLDSTSTMLQPNIVGNEHYETAQRVKQTSQRYKELQDIIAI…	2759	57655	103	6	0.126		0.599	*	1.116		0.057	*	0.108	*	2.093	*	0.954
11	21	gi|61968201|gb|AAX57027.1|	ATP synthase beta subunit [Amanoa strobilacea]	FPLEKKNQGRIAQIIGPVLDVAFPPGKMPNIYNALIVKGRDTVGQQINVTCEVQQLLGNNRVRAVAMSATDGLMRGMEVIDTGDPLSVPVGGVTLGRIFNVLGEPVDDLGPIDTRATYPIHRSAPAFIQLDTKLSIFETGIKVVDLLAPYRRGGKIGLFGGAGVGKTVLIMELINNIAKAHGGVSVFGGVGERTREGNDLYMEMKDSGVINEENIAESKVALVYGQMNEPPGARMRVGLTALTMAEYFRDVNKQDVLLFIDNIFRFVQAGSEVSALLGRMPSAVGYQPTLSTEMGSLQERITSTKEGAITSIQAVYVPADDLTDPAPATTFAHLDATTVLSRGLAVKGIYPAVDPLDSTSTMLQPQIVGPEHYETAQRVKQTLQRYKELQDIIAILGLD…	2435	58283	120	1	---		---		---		---		---		---		---
17	27	gi|17939849|emb|CAC81058.1|	mitochondrial F1 ATP synthase beta subunit [Arabidopsis thaliana]	MTMITPSSNTTHYRESWYACRYRSGIPGSTHASVASRRVLSSLLRSSSGRSAAKLGNRNPRLPSPSPARHAAPCSYLLGRVAEYATSSPASSAAPSSAPAKDEGKKTYDYGGKGAIGRVCQVIGAIVDVRFEDQEGLPPIMTSLEVQDHPTRLVLEVSHHLGQNVVRTIAMDGTEGLVRGRKVLNTGAPITVPVGRATLGRIMNVLGEPIDERGEIKTEHYLPIHRDAPALVDLATGQEILATGIKVVDLLAPYQRGGKIGLFGGAGVGKTVLIMELINNVAKAHGGFSVFAGVGERTREGNDLYREMIESGVIKLGEKQSESKCALVYGQMNEPPGARARVGLTGLTVAEYFRDAEGQDVLLFIDNIFRFTQANSEVSALLGRIPSAVGYQPTLASDL…	2046	71773	84	2	2.399	*	1.29		1.826	*	1.279		4.641	*	1.233		0.763
17	27	gi|186521400|ref|NP_568203.2|	ATP binding / hydrogen ion transporting ATP synthase, rotational mechanism [Arabidopsis thaliana]	MASRRVLSSLLRSSSGRSAAKLGNRNPRLPSPSPARPAAPCSYLLGRVAEYATSSPASSAAPSSAPAKDEGKKTYDYGGKGAIGRVCQVIGAIVDVRFEDQEGLPPIMTSLEVQDHPTRLVLEVSHHLGQNVVRTIAMDGTEGLVRGRKVLNTGAPITVPVGRATLGRIMNVLGEPIDERGEIKTEHYLPIHRDAPALVDLATGQEILATGIKVVDLLAPYQRGGKIGLFGGAGVGKTVLIMELINNVAKAHGGFSVFAGVGERTREGNDLYREMIESGVIKLGEKQSESKCALVYGQMNEPPGARARVGLTGLTVAEYFRDAEGQDVLLFIDNIFRFTQANSEVSALLGRIPSAVGYQPTLASDLGALQERITTTKKGSITSVQAIYVPADDLTDPAP…	2046	67979	84	2
17	27	gi|21281109|gb|AAM44896.1|	unknown protein [Arabidopsis thaliana] >gi|13548327|emb|CAC35874.1| H+-transporting ATP synthase beta chain (mitochondrial)-like protein [Arabidopsis thaliana] >gi|26452188|dbj|BAC43182.1| putative H+-transporting ATP synthase beta chain (mitochondr	MASRRVLSSLLRSSSGRSAAKLVNRNPRLPSPSPARHAAPCSYLLGRVAEYATSSPASSAAPSSAPAKDEGKKTYDYGGKGAIGRVCQVIGAIVDVRFEDQEGLPPIMTSLEVQDHPTRLVLEVSHHLGQNVVRTIAMDGTEGLVRGRKVLNTGAPITVPVGRATLGRIMNVLGEPIDERGEIKTEHYLPIHRDAPALVDLATGQEILATGIKVVDLLAPYQRGGKIGLFGGAGVGKTVLIMELINNVAKAHGGFSVFAGVGERTREGNDLYREMIESGVIKLGEKQSESKCALVYGQMNEPPGARARVGLTGLTVAEYFRDAEGQDVLLFIDNIFRFTQANSEVSALLGRIPSAVGYQPTLASDLGALQERITTTKKGSITSVQAIYVPADDLTDPAP…	2046	68061	84	2
17	27	gi|227303912|emb|CAY05977.1|	unnamed protein product [Brassica napus]	MASRRVLSTLLRSSSARSAARFGSRNPRLPSPSPARCASPFGDLLGRVAEYSTSSPAPPSSAPAKDEAKKTYDYGGKGAIGKVCQVIGAIVDVRFEDQEGLPPIMTSLEVQDHPTRLVLEVSHHLGQNVVRTIAMDGTEGLVRGRRVLNTGAPITVPVGRATLGRIMNVLGEPIDERGEIKTEHYLPIHRDAPALVDLATGQEILATGIKVVDLLAPYQRGGKIGLFGGAGVGKTVLIMELINNVAKAHGGFSVFAGVGERTREGNDLYREMIESGVIKLGEKQSESKCALVYGQMNEPPGARARVGLTGLTVAEYFRDAEGQDVLLFIDNIFRFTQANSEVSALLGRIPSAVGYQPTLASDLGALQERITTTKKGSITSVQAIYVPADDLTDPAPATT…	2046	67546	84	2
17	27	gi|227303914|emb|CAY05978.1|	unnamed protein product [Brassica napus]	MASRRVLSTLLRSSSSRSAARFATRNPRIPSPSPARCASPFGDLLGRVAEYSTSSPAAPSSPPPAKDEAKKKTYDYGGKGAIGKVCQVIGAIVDVRFEDQEGLPPIMTSLEVQDHPTRLVLEVSHHLGQNVVRTIAMDGTEGLVRGRRVLNTGAPITVPVGRATLGRIMNVLGEPIDERGEIKTEHYLPIHRDAPALVDLATGQEILATGIKVVDLLAPYQRGGKIGLFGGAGVGKTVLIMELINNVAKAHGGFSVFAGVGERTREGNDLYREMIESGVIKLGEKQSESKCALVYGQMNEPPGARARVGLTGLTVAEYFRDAEGQDVLLFIDNIFRFTQANSEVSALLGRIPSAVGYQPTLASDLGALQERITTTKKGSITSVQAIYVPADDLTDPAPA…	2046	68120	84	2
17	27	gi|23397307|gb|AAN31935.1|	unknown protein [Arabidopsis thaliana]	LEVQDHPTRLVLEVSHHLGQNVVRTIAMDGTEGLVRGRKVLNTGAPITVPVGRATLGRIMNVLGEPIDERGEIKTEHYLPIHRDAPALVDLATGQEILATGIKVVDLLAPYQRGGKIGLFGGAGVGKTVLIMELINNVAKAHGGFSVFAGVGERTREGNDLYREMIESGVIKLGEKQSESKCALVYGQMNEPPGARARVGLTGLTVAEYFRDAEGQDVLLFIDNIFRFTQANSEVSALLGRIPSAVGYQPTLASDLGALQERITTTKKGSITSVQAIYVPADDLTDPAPATTFAHLDATTVLSRQISELGIYPAVDPLDSTSRMLSPHILGEEHYNTARGVQKVLQNYKNLQDIIAILGMDELSEDDKLTVARARKIQRFLSQPFHVAEIFTGAPGKYV…	2046	54977	84	2
17	27	gi|297317193|gb|EFH47615.1|	ATP synthase beta chain 1, mitochondrial [Arabidopsis lyrata subsp. lyrata] >gi|13548325|emb|CAC35872.1| H+-transporting ATP synthase beta chain (mitochondrial)-like protein [Arabidopsis thaliana] >gi|19347814|gb|AAL86357.1| unknown protein [Arabido	MASRRVLSSLLRSSSGRSAAKLGNRNPRLPSPSPARHAAPCSYLLGRVAEYATSSPASSAAPSSAPAKDEGKKTYDYGGKGAIGRVCQVIGAIVDVRFEDQEGLPPIMTSLEVQDHPTRLVLEVSHHLGQNVVRTIAMDGTEGLVRGRKVLNTGAPITVPVGRATLGRIMNVLGEPIDERGEIKTEHYLPIHRDAPALVDLATGQEILATGIKVVDLLAPYQRGGKIGLFGGAGVGKTVLIMELINNVAKAHGGFSVFAGVGERTREGNDLYREMIESGVIKLGEKQSESKCALVYGQMNEPPGARARVGLTGLTVAEYFRDAEGQDVLLFIDNIFRFTQANSEVSALLGRIPSAVGYQPTLASDLGALQERITTTKKGSITSVQAIYVPADDLTDPAP…	2046	68019	84	2
17	27	gi|297806943|ref|XP_002871355.1|	hypothetical protein ARALYDRAFT_487710 [Arabidopsis lyrata subsp. lyrata] >gi|297317192|gb|EFH47614.1| hypothetical protein ARALYDRAFT_487710 [Arabidopsis lyrata subsp. lyrata]	MASRRILSSLLRSSSGRSTSKSSLIGSRNPRLSSPGPAHRAAPCGTLLGRVAEYSTSSPANSAAPSPAPAKDEGKKTYDYGGKGAIGRVCQVIGAIVDVRFEDQEGLPPIMTSLEVQDHPTRLVLEVSHHLGQNVVRTIAMDGTEGLVRGRKVLNTGAPITVPVGRATLGRIMNVLGEPIDERGEIKTEHYLPIHRDAPALVDLATGQEILATGIKVVDLLAPYQRGGKIGLFGGAGVGKTVLIMELINNVAKAHGGFSVFAGVGERTREGNDLYREMIESGVIKLGEKQSESKCALVYGQMNEPPGARARVGLTGLTVAEYFRDAEGQDVLLFIDNIFRFTQANSEVSALLGRIPSAVGYQPTLASDLGALQERITTTKKGSITSVQAIYVPADDLTD…	2046	68260	84	2
17	27	gi|75333362|sp|Q9C5A9.1|ATPBO_ARATH	RecName: Full=ATP synthase subunit beta-3, mitochondrial; Flags: Precursor >gi|227303608|emb|CAY05825.1| unnamed protein product [Arabidopsis thaliana] >gi|22326673|ref|NP_680155.1| ATP synthase beta chain, mitochondrial, putative [Arabidopsis thali	MASRRILSSLLRSSSSRSTSKSSLIGSRNPRLLSPGPAHGAAPCGTLLGRVAEYSTSSPANSAAPSSAPAKDEGKKTYDYGGKGAIGRVCQVIGAIVDVRFEDQEGLPPIMTSLEVQDHPTRLVLEVSHHLGQNVVRTIAMDGTEGLVRGRKVLNTGAPITVPVGRATLGRIMNVLGEPIDERGEIKTEHYLPIHRDAPALVDLATGQEILATGIKVVDLLAPYQRGGKIGLFGGAGVGKTVLIMELINNVAKAHGGFSVFAGVGERTREGNDLYREMIESGVIKLGEKQSESKCALVYGQMNEPPGARARVGLTGLTVAEYFRDAEGQDVLLFIDNIFRFTQANSEVSALLGRIPSAVGYQPTLASDLGALQERITTTKKGSITSVQAIYVPADDLTD…	2046	68207	84	2
19	29	gi|9466236|gb|AAF76332.2|	ribulose biphosphate carboxylase large subunit [Heterocentron subtriplinervium]	VAYPLDLFEEGSVTNMFTSIVGNVFGFKALRALRLEDLRIPTAYIKTFQGPPHGIQVERDKLNKYGRPLLGCTIKPKLGLSAKNYGRAVYECLRGGLDFTKDDENVNSQPFMRWRDRFLFCAEAIYKAQAETGEIKGHYLNATAGTCEEMIKRAVFARELGVPIVMHDYLTGGFTANTSLAHYCRDNGLLLHIHRAMHAVIDRQKNHGMHFRVLAKALRMSGGDHIHAGTVVGKLEGEREITLGFVDLLRMDYIEKDRSRGIYFDQDWVSLPGVIPVASGGIHVWHMPALTEIFGDDSVLQFGGGTLGHPWGNAPGAVSNRVALEACVQARNEGRDLAREGNEIIREASKWSPELAAACEVWKEIKFEFEAMDTL	1990	47975	104	5	---		0.58		0.237	*	---		0.041		0.116	*	---
21	36	gi|21389109|gb|AAM50489.1|	ribulose-1,5-bisphosphate carboxylase/oxygenase large subunit [Primula deorum]	PLDLFEEGSVTNMFTSIVGNVFGFKALRALRLEDLRIPPAYVKTFQGPPHGIQVERDKLNKYGRPLLGCTIKPKLGLSAKNYGRAVYECLRGGLDFTKDDENVNSQPFMRWRDRFLFCAEALYKAQAETGEIKGHYLNATAGTCEEMIKRAVFARELGVPIVMHDYLTGGFTANTSLAHYCRDNGLLLHIHRAMHAVIDRQKNHGIHFRVLAKALRMSGGDHIHSGTVVGKLEGEREITLGFVDLLRDDYIEKDRSRGXYFTQDWVSLPGVLPVASGGIHVWHMPALTEIFGDDSVLQFGGGTLGHPWGNAPGAVANRVALEACVQARNEGRDLAREGNEIIREACKWSPELAAACEVWKEIKFEFEAMDTL	1884	47647	102	2	---		0.92		---		0.137		---		---		0.427
22	39	gi|464024|gb|AAA16968.1|	ribulose-1,5-bisphosphate carboxylase/oxygenase large subunit [Suriana maritima]	MSPQTETKASVGFKAGVKDYKLTYYTPDYETKDTDILAAFRVTPQPGVPPEEAGAAVAAESSTGTWTTVWTDGLTSLDRYKGRCYHIEPVAGEENQYIAYVAYPLDLFEEGSVTNMFTSIVGNVFGFKALRALRLEDLRIPNSYIKTFQGPPHGIQVERDKLNKYGRPLLGCTIKPKLGLSAKNYGRAVYECLRGGLDFTKDDENVNSQPFMRWRDRFVFCAEAIFKAQGETGEIKGHYLNATAGTYEEMIKRAVFARELGVPIIMHDYLTGGFTANTSLAHYCRDNGLLLHIHRAMHAVIDRQKNHGMHFRVLAKALRLSGGDHIHAGTVVGKLEGKREITLGFVDLLRDDFIEKDRSRGIYFTQDWVSLPGVLPVASGGIHVWHMPALTEIFGDDSV…	1858	61033	106	2	0.037		0.742		0.232	*	0.107	*	0.199	*	0.147	*	0.132
23	46	gi|33312161|gb|AAQ04019.1|	ribulose-1,5-bisphosphate carboxylase/oxygenase large subunit [Vaccinium vitis-idaea]	MSPQTETKASVGFKAGVKDYKLTYYXPNYETKDTDILAAFRVTPQPGVPPEEAGAAVAAEFXTGTWTTVWTDGLXSLDRYKGGWYHIEPVPGDENQFIAYVAYPLDLFEEGSVTNMFTSIVGNVFGFKALRALRLEDLRIPVAYVKTFQGPPHGIQVERDKLNKYGRPLLGCTIKPKLGLSAKNYGRAVYECLRGGLDFTKDDENVNSQPFMRWRDRFLFCAEALFKAQAETGEIKGHYLNATAGTCEEMNKRAVFARELGVPIVMHDYLTGGFTANTSLAEXCRXNGLLLHIHRAMPAVIDRQKNHGILFRVLPXALRXSGGDHIHSGTVVRKLEGERXITLGFVDLLRDDYIEXDXXRGIYFXPDWVSLPGVLPVASGGIHVWHMPALTEIFGDDSV…	1820	55101	99	2	---		0.576	*	---		---		0.442		---		---
25	48	gi|4038532|emb|CAB02226.1|	ribulose-1,5-bisphosphate carboxylase, large subunit [Cariniana legalis]	KLTYYTPEYKTLDTDILAAFRVTPQPGVPPEEAGAAVAAESSTGTWTTVWTDGLTSLDRYKGRCYHIEPVPGXDNQYIAYVAYPLDLFEEGSVTNMFTSIVGNVFGFKALRALRLEDLRIPPAYIKTFQGPPHGIQVERDKLNKYGRPLLGCTIKPKLGLSAKNYGRAVYECLRGGLDFTKDDENVNSQPFMRWRDRFVFCAEAXYKAQXETGEIKGHYLNAXAGTSEEMMKRXIFARELGVPIVMHDYLTGGFTANTSLAHYCRDNGLLLHIHRAMHAVIDRQKNHGMHFRVLAKALRMSGGDHIHAGTVVGKLEGEREITLGFVDLLRDDYIEKDRSRGIYFTQDWVSMPGVLPVASGGIHVWHMPAXTEIFGDDSVLQFGGGTLGHPWGNAPGAVA…	1792	57803	98	1	---		---		---		---		---		---		---
29	54	gi|62861063|gb|AAY16643.1|	ribulose-1,5-bisphosphate carboxylase/oxygenase large subunit [Synadenium grantii]	VGFKAGVKDYKLTYYTPEYETKDTDILAAFRVSPQPGVPPEEAGAAVAAESSTGTWTTVWTDGLTSLDRYKGRCYHIEPVAGEENQYIAYVAYPLDLFEEGSVTNMFTSIVGNVFGFKALRALRLEDLRIPTSYTKTFQGPPHGIQVERDKLNKYGRPLLGCTIKPKLGLSAKNYGRAVYECLRGGLDFTKDDENVNSQPFMRWRDRFLFCAEAIFKSQAETGEIKGHYLNATAGTCEEMIKRAVFARELGVPIVMHDYLTGGFTANTXLAHYCRDKGLLLHXHRAMXAVIXRHXXHGIHFRVLAKALRMSGGDHIHAGXVVGKLXGEREITLGFVDLLRDDFIEKDRSRGIYFTQDWVSLPGVLPVASGGIHVWHMPALTEIFGDDXVLQFGGGTLGH…	1584	59384	84	4	---		0.444	*	0.242	*	0.057	*	0.109	*	0.243	*	0.176	*
32	60	gi|7677038|gb|AAF66999.1|AF139877_1	ribulose-1,5-bisphosphate carboxylase/oxygenase large subunit [Podophyllum peltatum]	KAGVKDYKLTYYTPDYVTKDTDILAAFRVTPQPGVPPEEAGAAVAAESSTGTWTTVWTDGLTSLDRYKGRCYHIEPVAGEDNQYICYVAYPLDLFEEGSVTNMFTSIVGNVFGFKALRALRLEDLRIPVAYVKTFQGPPHGIQVERDKLNKYGRPLLGCTIKPKLGLSAKNYGRAVYECLRGGLDFTKDDENVNSXPFMRWRDRFPFCAEAIFKSQPETGEIKGHYLNATAGTCEEMMKRAVFARELGVPIVMHDYLTGGFTANTSLAHYCRDDGILLHIHRAMHAVIDRQKNHGIHFRVLAKALRMSGGDHIHAGTVVGKLEGEREITLGFVDLLRDDFIEKDRSRGIYFTQDWVSLPGVLPVASGGIHVWHMPALTEIFGDDSVLQFGGGTLGHPWG…	1527	56983	72	6	0.05	*	0.348	*	0.29	*	0.043	*	0.132	*	0.108	*	0.15	*
39	77	gi|297828850|ref|XP_002882307.1|	hypothetical protein ARALYDRAFT_477628 [Arabidopsis lyrata subsp. lyrata] >gi|297328147|gb|EFH58566.1| hypothetical protein ARALYDRAFT_477628 [Arabidopsis lyrata subsp. lyrata]	MASHIVGYPRMGPKRELKFALESFWDGKSTAEDLQKVSADLRSDIWKQMSAAGIKYIPSNTFSHYDQVLDTTAMLGAVPPRYGFTSGEIGLDVYFSMARGNASVPAMEMTKWFDTNYHYIVPELGPEVKFSYASHKAVNEYKEAKALGVETVPVLVGPVSYLLLSKLAKGVDKSFDLLSLLPKILPVYKEVIAELKAAGASWIQLDEPLFVMDLEGQKLQAFSGAYAELESTLSGLNVLVETYFADIPAEAYKTLTSLKGVTAFGFDLVRGTKTIDLIKAGFPQGKYLFAGVVDGRNIWANDLAASLITLQSLEGVVGKDKLVVSTSCSLLHTAVDLVNETKLDAEIKSWLAFAAQKVVEVDALAKALAGQTNESFFTANADALSSRRSSPRVTNESVQ…	1308	102226	54	14	3.216	*	1.458		1.974	*	7.455		0.717		1.358		1.478	*
39	77	gi|312282065|dbj|BAJ33898.1|	unnamed protein product [Thellungiella halophila]	MASHIVGYPRMGPKRELKFALESFWDGKSTAEDLKKVSADLRSDIWKQMSAAGIKYIPSNTFAYYDQVLDTTAMLGAVPPRYGWNSGEIGFDVYFSMARGNASVPAMEMTKWFDTNYHYIVPELGPEVKFSYASHKAVNEYKEAKALGVETVPVLVGPVSYLLLSKLAKGVDKSFDLLSLLPKILPIYKEVIAELKGAGATWIQFDEPLFVMDLEGHKLQAFSGAYAELESTLSGLNVLVETYFADVPAEAFKTLTSLKGVTSFGFDLIRGTKTLDLIKSSFPKGKYLFAGVVDGRNIWANDLAASLITLQSLEGAVGKDKLVVSTSCSLLHTAVDLVNETKLDAEIKSWLAFAAQKVVEVDALAKALVGQTNEAFFSANAAALSSRRSSPRVTNESVQ…	1308	103001	54	14
45	89	gi|20257374|gb|AAM15869.1|	ribulose 1,5-bisphosphate carboxylase/oxygenase [Ficalhoa laurifolia]	VTNMFTSIVGNVFGFKALRALRXEDLRIPSGYVKTFQGSXHGIQVERDKLNKYGRPLLGCTIKPKLGLSXKNYGRAVYECLRGGLDFTKDDENVNSQPFMRWRDRFVFCAEAIYKAQAEIGEIKGHYLNATAGTCEDMMKRAAFARELGVPIVMHDYLTGGFTANTTLAHYCQDNGLLLHIHRVMHAVIDRQKNHGIHFRVLAKALRMSGGDHIHSGTAVGKLEGEREITLGFVDLLRDDFVEKDRSRGIYFTQDWASLPGVLPVASGGIHVWHMPALTEIFGDDSVLQFGGGTLGHPWGNAPGAVANXVALEACVQARNEGRDLAREGNEIIREACKWSPELAAACAVWKEIKFEFPAMDTL	1205	46446	61	2	---		0.777		0.065	*	0.081	*	0.176	*	0.075	*	0.244
51	98	gi|1703107|sp|P53504.1|ACT1_SORBI	RecName: Full=Actin-1 >gi|499012|emb|CAA55923.1| actin [Sorghum bicolor]	MADAEDIQPLVCDNGTGMVKAGFAGDDAPRAVFPSIVGRPRHTGVMVGMGQKDAYVGDEAQSKRGILTLKYPIEHGIVSNWDDMEKIWHHTFYNELRVAPEEHPVLLTEAPLNPKANREKMTQIMFETFNTPAMYVAIQAVLSLYASGRTTGIVLDSGDGVSHTVPIYEGYALPHAILRLDLAGRDLTDYLMKILTERGYSFTTTAEREIVRDMKEKLAYIALDYDQEMETAKTSSSVEKSYELPDGQVITIAADRFRCPEVLFQPSFIGMEAAGIHETTYNSIMKCDVDIRKDLYGNIVLSGGTTMFPGIADRMRQGNHCLAPSSMKIKVVAPPERKYSVWIGGSILASLSTFQQMWIAKAEYDESGPSIVHRKCF	1153	48205	55	14	1.507		1.643		1.294	*	0.643		2.156		0.674		0.359	*
58	107	gi|119952178|dbj|BAA96365.3|	oxygen evolving enhancer protein 1 precursor [Bruguiera gymnorhiza]	MAASLQAAATLMQPAKVGVPSRTGLQLRSSQIVSRAFGLEPAAARITCSSQTDFKDLAQKCVDATKIAGFALATSALVVSGAGAEGVPKRLTYDEIQSKTYLEVKGTGTANQCPTIEGGVDSFAFKPGKYNVKKLCLEPTSFTVKAEGVNKNAPPEFQNTKLMTRLTYTLDEIEGPFEVSPDGTVKFVEKDGIDYAAVTVQLPGGERVPFLFTVKQLVATGKPESFSGEYLVPSYRGSSFLDPKGRGGSTGYBNAVALPAGGRGDEEELTKENIKNTSSSTGKITLGVTKSKPETGEVIGVFESLQPSDTDLGAKVPKDVKIQGIWYAQLDS	1112	43861	33	7	---		0.345		0.32		0.446	*	0.209		1.55	*	1.993	*
63	112	gi|257344495|emb|CBC02905.1|	unnamed protein product [Cucumis sativus] >gi|219766613|emb|CAW63978.1| unnamed protein product [Cucumis sativus] >gi|6911551|emb|CAB72129.1| heat shock protein 70 [Cucumis sativus] >gi|257307285|emb|CBC46509.1| unnamed protein product [Cucumis sati	MAGKGEGPAIGIDLGTTYSCVGVWQHDRVEIFANDQGNRTTPSYVAFTDSERLIGDAAKNQVAMNPINTVFDAKRLIGRRFSDASVQSDIKLWPFKVIAGPSDKPMIVVNYKGEEKQFSAEEISSMVLIKMKEIAEAYLGTTVKNAVVTVPAYFNDSQRQATKDAGVISGLNVMRIINEPTAAAIAYGLDKKSSSSGEKNVLIFDLGGGTFDVSLLTIEEGIFEVKSTAGDTHLGGEDFDNRLVNHFVQEFKRKNKKDISGNPRALRRLRTACERAKRTLSSTAQTTIEIDSLYEGIDFYSTITRARFEELNMDLFRKCMEPVEKCLRDAKMDKSTVHDVVLVGGSTRIPKVQQLLQDFFDGKELCKSINPDEAVAYGAAVQAAILSGEGNEKVQDLLL…	1073	88270	42	6	0.716		0.877		1.567	*	0.596	*	0.531	*	0.817		0.352	*
76	127	gi|257344397|emb|CBC02856.1|	unnamed protein product [Solanum lycopersicum] >gi|219773911|emb|CAW36971.1| unnamed protein product [Solanum lycopersicum] >gi|219764952|emb|CAW63929.1| unnamed protein product [Solanum lycopersicum] >gi|762844|gb|AAB42159.1| Hsc70 [Solanum lycoper	MAGKGEGPAIGIDLGTTYSCVGVWQHDRVEIIANDQGNRTTPSYVAFTDTERLIGDAAKNQVAMNPTNTVFDAKRLIGRRFSDPSVQSDMKLWPFKVIPGPADKPMIVVNYKGEEKQFSAEEISSMVLIKMKEIAEAFLGTTIKNAVVTVPAYFNDSQRQATKDAGTISGLNVMRIINEPTAAAIAYGLDKKISSTGEKTVLIFDLGGGTFDVSLLTIEEGIFEVKATAGDTHLGGEDFDNRMVNHFVQEFKRKHKKDISGNPRALRRLRTACERAKRTLSSTAQTTIEIDSLYEGIDFYTTITRARFEELNMDLFRKCMEPVEKCLRDAKIDKSGVHDIVLVGGSTRIPKVQQLLQDFFNGRELCKSINPDEAVAYGAAVQAAILSGEGNEKVQDLLL…	1002	88297	38	1	---		---		---		---		---		---		---
80	132	gi|312281705|dbj|BAJ33718.1|	unnamed protein product [Thellungiella halophila]	MAAAVSTVGAINRAPLSLNGSGAGAASVPATTFLGKKVVTTSRFAQSNKKSSGSFKVVAVKEDKQTDGDRWKGLAYDMSDDQQDITRGKGLVDSVFQAPMGTGTHHAVLSSYEYISQGLRQYNLDNMMDGFYIAPAFMDKLVVHITKNFLTLPNIKVPLILGIWGGKGQGKSFQCELVMAKMGINPIMMSAGELESGNAGEPAKLIRQRYREAADMIKKGKMCCLFINDLDAGAGRMGGTTQYTVNNQMVNATLMNIADNPTNVQLPGMYNKEDNARVPIIVTGNDFSTLYAPLIRDGRMEKFYWAPTREDRIGVCKGIFRTDKINDEDIVTLVDQFPGQSIDFFGALRARVYDDEVRKFVEGLGVEKIGKRLVNSREGPPVFEQPEMTLEKLMEYGNM…	974	57024	34	14	0.153	*	0.47		0.033	*	0.076	*	0.309	*	0.362		0.126	*
90	145	gi|125555777|gb|EAZ01383.1|	hypothetical protein OsI_23416 [Oryza sativa Indica Group]	MGELKRLYLRPQQVAEEENEIHVGYEDDQFGGCSCWASNMGLVKDGAADLEEGTLEIGMEYRTVSGVAGPLVILDKVKGPKYQEIVNIRLGDGTTRRGQVLEVDGEKAVVQVFEGTSGIDNKYTTVQFTGEVLKTPVSLDMLGRIFNGSGKPIDNGPPILPEAYLDISGSSINPSERTYPEEMIQTGISTIDVMNSIARGQKIPLFSAAGLPHNEIAAQICRQAGLVKSLEKGKHAEGGEDDNFAIVFAAMGVNMETAQFFKRDFEENGSMERVTLFLNLANDPTIERIITPRIALTTAEYLAYECGKHVLVILTDMSSYADALREVSAAREEVPGRRGYPGYMYTDLATIYERAGRIEGRSGSITQIPILTMPNDDITHPTPDLTGYITEGQIYIDRQ…	927	65413	28	11
90	145	gi|125597623|gb|EAZ37403.1|	hypothetical protein OsJ_21740 [Oryza sativa Japonica Group]	MGELKRLYLRPQQVAEEENEIHVGYEDDQFGGCSCWASNMGLVKDGAADLEEGTLEIGMEYRTVSGVAGPLVILDKVKGPKYQEIVNIRLGDGTTRRGQVLEVDGEKAVVQVFEGTSGIDNKYTTVQFTGEVLKTPVSLDMLGRIFNGSGKPIDNGPPILPEAYLDISGSSINPSERTYPEEMIQTGISTIDVMNSIARGQKIPLFSAAGLPHNEIAAQICRQAGLVKSLEKGKHAEGGEDDNFAIVFAAMGVNMETAQFFKRDFEENGSMERVTLFLNLANDPTIERIITPRIALTTAEYLAYECGKHVLVILTDMSSYADALREVSAAREEVPGRRGYPGYMYTDLATIYERAGRIEGRSGSITQIPILTMPNDDITHPTPDLTGYITEGQIYIDRQ…	927	65427	28	11
90	145	gi|147806440|emb|CAN67614.1|	hypothetical protein [Vitis vinifera]	MGVEQNNHDAEEGTLLVGMEYRTVSGVAGPLVILEKVKGPKYQEIVNIRLGDGTTRRGQVLEXDGEKAVVQVFEGTSGIDNKYTTVQFTGEVLKTPVSLDMLGRIFNGSGKPIDNGPPILPEAYLDISGSSINPSERTYPEEMIQTGISTIDVMNSIARGQKIPLFSAAGLPHNEIAAQICRQAGLVKRLEKSGSLLEDVEEDNFAIVFAAMGVNMETAQFFKRDFEENGSMERVTLFLNLANDPTIERIITPRIALTTAEYLAYECGKHVLVILTDMSSYADALREVSAAREEVPGRRGYPGYMYTDLATIYERAGRIEGRKGSITQIPILTMPNDDITHPTPDLTGYITEGQIYIDRQLHNRQIYPPINVLPSLSRLMKSAIGEGMTRRDHADVSNQ…	927	60463	28	11
90	145	gi|215712220|dbj|BAG94347.1|	unnamed protein product [Oryza sativa Japonica Group] >gi|53791997|dbj|BAD54582.1| vacuolar ATPase B subunit [Oryza sativa Japonica Group] >gi|113595942|dbj|BAF19816.1| Os06g0568200 [Oryza sativa Japonica Group] >gi|53793338|dbj|BAD54559.1| vacuolar	MGLVKDGAADLEEGTLEIGMEYRTVSGVAGPLVILDKVKGPKYQEIVNIRLGDGTTRRGQVLEVDGEKAVVQVFEGTSGIDNKYTTVQFTGEVLKTPVSLDMLGRIFNGSGKPIDNGPPILPEAYLDISGSSINPSERTYPEEMIQTGISTIDVMNSIARGQKIPLFSAAGLPHNEIAAQICRQAGLVKSLEKGKHAEGGEDDNFAIVFAAMGVNMETAQFFKRDFEENGSMERVTLFLNLANDPTIERIITPRIALTTAEYLAYECGKHVLVILTDMSSYADALREVSAAREEVPGRRGYPGYMYTDLATIYERAGRIEGRSGSITQIPILTMPNDDITHPTPDLTGYITEGQIYIDRQLHNRQIYPPINVLPSLSRLMKSAIGEGMTRRDHSDVSNQ…	927	60527	28	11
90	145	gi|222423992|dbj|BAH19957.1|	AT4G38510 [Arabidopsis thaliana]	MGAAENNLEMEGTLEIGMEYRTVSGVAGPLVILEKVRGPKYQEIVNIRLGDGTTRRGQVLEVDGEKAVVQVFEGTSGIDNKYTTVQFTGEVLKTPVSLDMLGRIFNGSGKPIDNGPPILPEAYLDISGSSINPSERTYPEEMIQTGISTIDVMNSIARGQKIPLFSAAGLPHNEIAAQICRQAGLVKRLEKSDNLLEHQEDDNFAIVFAAMGVNMETAQFFKRDFEENGSMERVTLFLNLANDPTIERIITPRIALTTAEYLAYECGKHVLVILTDMSSYADALREVSAAREEVPGRRGYPGYMYTDLATIYERAGRIEGRKGSITQIPFLTMPNDDITHPTPDLTGYITEGQIYIDRQLHNRQIYPPINVLPSLSRLMKSAIGEGMTRRDHSDVSNQL…	927	60227	28	11
90	145	gi|223551297|gb|EEF52783.1|	ATP synthase subunit beta vacuolar, putative [Ricinus communis] >gi|255539062|ref|XP_002510596.1| ATP synthase subunit beta vacuolar, putative [Ricinus communis]	MGAAEKSFDMEEGTLEIGMEYRTVSGVAGPLVILDKVKGPKYQEIVNIRLGDGTTRRGQVLEVDGEKAVVQVFEGTSGIDNKYTTVQFTGEVLKTPVSLDMLGRIFNGSGKPIDNGPPILPEAYLDISGSSINPSERTYPEEMIQTGISTIDVMNSIARGQKIPLFSAAGLPHNEIAAQICRQAGLVKRLEKSGNLMEDDVEDNFAIVFAAMGVNMETAQFFKRDFEENGSMERVTLFLNLANDPTIERIITPRIALTTAEYLAYECGKHVLVILTDMSSYADALREVSAAREEVPGRRGYPGYMYTDLATIYERAGRIEGRKGSITQIPILTMPNDDITHPTPDLTGYITEGQIYIDRQLHNRQIYPPINVLPSLSRLMKSAIGEGMTRRDHSDVSNQ…	927	60820	28	11
90	145	gi|225459744|ref|XP_002285897.1|	PREDICTED: hypothetical protein [Vitis vinifera]	MGEAQNMPDMEEGSLLVGMEYRTVSGVAGPLVILEKVKGPKYQEIVNIRLGDGTTRRGQVLEVDGEKAVVQVFEGTSGIDNKYTTVQFTGEVLKTPVSLDMLGRIFNGSGKPIDNGPPILPEAYLDISGSSINPSERTYPEEMIQTGISTIDVMNSIARGQKIPLFSAAGLPHNEIAAQICRQAGLVKRLEKSGNLLEDEVEDNFAIVFAAMGVNMETAQFFKRDFEENGSMERVTLFLNLANDPTIERIITPRIALTTAEYLAYECGKHVLVILTDMSSYADALREVSAAREEVPGRRGYPGYMYTDLATIYERAGRIEGRKGSITQIPILTMPNDDITHPTPDLTGYITEGQIYIDRQLHNRQIYPPINVLPSLSRLMKSAIGEGMTRRDHADVSNQ…	927	60443	28	11
90	145	gi|226492645|ref|NP_001148978.1|	vacuolar ATP synthase subunit B [Zea mays] >gi|195623746|gb|ACG33703.1| vacuolar ATP synthase subunit B isoform 1 [Zea mays]	MGLVKEGVDMEEGTLEIGMEYRTVSGVAGPLVILDKVKGPKYQEIVNIRLGDGTTRRGQVLEVDGEKAVVQVFEGTSGIDNKYTTVQFTGEVLKTPVSLDMLGRIFNGSGKPIDNGPPILPEAYLDISGSSINPSERTYPEEMIQTGISTIDVMNSIARGQKIPLFSAAGLPHNEIAAQICRQAGLVKTLEKGKHAEGGEDDNFAIVFAAMGVNMETAQFFKRDFEENGSMERVTLFLNLANDPTIERIITPRIALTTAEYLAYECGKHVLVILTDMSSYADALREVSAAREEVPGRRGYPGYMYTDLATIYERAGRIEGRTGSITQIPILTMPNDDITHPTPDLTGYITEGQIYIDRQLHNRQIYPPINVLPSLSRLMKSAIGEGMTRRDHSDVSNQL…	927	60530	28	11
90	145	gi|226531470|ref|NP_001152665.1|	vacuolar ATP synthase subunit B [Zea mays] >gi|195658699|gb|ACG48817.1| vacuolar ATP synthase subunit B isoform 1 [Zea mays]	MGLVKEGIDMEEGTLEIGMEYRTVSGVAGPLVILDKVKGPKYQEIVNIRLGDGTNRRGQVLEVDGEKAVVQVFEGTSGIDNKYTTVQFTGEVLKTPVSLDMLGRIFNGSGKPIDNGPPILPEAYLDISGSSINPSERTYPEEMIQTGISTIDVMNSIARGQKIPLFSAAGLPHNEIAAQICRQAGLVKTLEKGKHAEGGEDDNFAIVFAAMGVNMETAQFFKRDFEENGSMERVTLFLNLANDPTIERIITPRIALTTAEYLAYECGKHVLVILTDMSSYADALREVSAAREEVPGRRGYPGYMYTDLATIYERAGRIEGRTGSITQIPILTMPNDDITHPTPDLTGYITEGQIYIDRQLHNRQIYPPINVLPSLSRLMKSAIGEGMTRRDHSDVSNQL…	927	60557	28	11
90	145	gi|2493131|sp|Q40078.1|VATB1_HORVU	RecName: Full=V-type proton ATPase subunit B 1; Short=V-ATPase subunit B 1; AltName: Full=Vacuolar proton pump subunit B 1 >gi|167108|gb|AAA81330.1| vacuolar ATPase B subunit [Hordeum vulgare]	MGLVKEGADMEEGTLEIGMEYRTVSGVAGPLVILDKVKGPKYQEIVNIRLGDGTTRRGQVLEVDGEKAVVQVFEGTSGIDNKYTTVQFTGEVLKTPVSLDMLGRIFNGSGKPIDNGPPILPEAYLDISGSSINPSERTYPEEMIQTGISTIDVMNSIARGQKIPLFSAAGLPHNEIAAQICRQAGLVKRLEKGKHAEGGGEDDNFAIVFAAMGVNMETAQFFKRDFEENGSMERVTLFLNLANDPTIERIITPRIALTTAEYLAYECGKHVLVILTDMSSYADALREVSAAREEVPGRRGYPGYMYTDLATIYERAGRIEGRTGSITQIPILTMPNDDITHPTPDLTGYITEGQIYIDRQLHNRQIYPPINVLPSLSRLMKSAIGEGMTRRDHSDVSNQ…	927	60495	28	11
90	145	gi|2493132|sp|Q40079.1|VATB2_HORVU	RecName: Full=V-type proton ATPase subunit B 2; Short=V-ATPase subunit B 2; AltName: Full=Vacuolar proton pump subunit B 2 >gi|167110|gb|AAA81331.1| vacuolar ATPase B subunit [Hordeum vulgare]	MAPEMEEGTLEIGMEYRTVSGVAGPLVILDKVKGPKYQEIVNIRLGDGTTRRGQVLEVDGEKAVVQVFEGTSGIDNKYTTVQFTGEVLKTPVSLDMLGRIFNGSGKPIDNGPPILPEAYLDISGSSINPSERTYPEEMIQTGISTIDVMNSIARGQKIPLFSAAGLPHNEIAAQICRQAGLVKRLEQSKHAAEGGEEDNFAIVFAAMGVNMETAQFFKRDFEENGSMERVTLFLNLANDPTIERIITPRIALTTAEYLAYECGKHVLVILTDMSSYADALREVSAAREEVPGRRGYPGYMYTDLATIYERAGRIEGRKGSITQIPILTMPNDDITHPTPDLTGYITEGQIYIDRQLHNRQIYPPINVLPSLSRLMKSAIGEGMTRRDHSDVSNQLYANY…	927	59891	28	11
90	145	gi|297744573|emb|CBI37835.3|	unnamed protein product [Vitis vinifera] >gi|225428086|ref|XP_002280291.1| PREDICTED: hypothetical protein [Vitis vinifera]	MGVEQNNHDAEEGTLLVGMEYRTVSGVAGPLVILEKVKGPKYQEIVNIRLGDGTTRRGQVLEVDGEKAVVQVFEGTSGIDNKYTTVQFTGEVLKTPVSLDMLGRIFNGSGKPIDNGPPILPEAYLDISGSSINPSERTYPEEMIQTGISTIDVMNSIARGQKIPLFSAAGLPHNEIAAQICRQAGLVKRLEKSGSLLEDVEEDNFAIVFAAMGVNMETAQFFKRDFEENGSMERVTLFLNLANDPTIERIITPRIALTTAEYLAYECGKHVLVILTDMSSYADALREVSAAREEVPGRRGYPGYMYTDLATIYERAGRIEGRKGSITQIPILTMPNDDITHPTPDLTGYITEGQIYIDRQLHNRQIYPPINVLPSLSRLMKSAIGEGMTRRDHADVSNQ…	927	60451	28	11
90	145	gi|302141720|emb|CBI18923.3|	unnamed protein product [Vitis vinifera]	MCYREFERSEEKSLNMGEAQNMPDMEEGSLLVGMEYRTVSGVAGPLVILEKVKGPKYQEIVNIRLGDGTTRRGQVLEVDGEKAVVQVFEGTSGIDNKYTTVQFTGEVLKTPVSLDMLGRIFNGSGKPIDNGPPILPEAYLDISGSSINPSERTYPEEMIQTGISTIDVMNSIARGQKIPLFSAAGLPHNEIAAQICRQAGLVKRLEKSGNLLEDEVEDNFAIVFAAMGVNMETAQFFKRDFEENGSMERVTLFLNLANDPTIERIITPRIALTTAEYLAYECGKHVLVILTDMSSYADALREVSAAREEVPGRRGYPGYMYTDLATIYERAGRIEGRKGSITQIPILTMPNDDITHPTPDLTGYITEGQIYIDRQLHNRQIYPPINVLPSLSRLMKSAI…	927	62706	28	11
90	145	gi|4467138|emb|CAB37507.1|	probable H+-transporting ATPase [Arabidopsis thaliana] >gi|42573221|ref|NP_974707.1| vacuolar ATP synthase subunit B, putative / V-ATPase B subunit, putative / vacuolar proton pump B subunit, putative / V-ATPase 57 kDa subunit, putative [Arabidopsis	MGAAENNLEMEGTLEIGMEYRTVSGVAGPLVILEKVKGPKYQEIVNIRLGDGTTRRGQVLEVDGEKAVVQVFEGTSGIDNKYTTVQFTGEVLKTPVSLDMLGRIFNGSGKPIDNGPPILPEAYLDISGSSINPSERTYPEEMIQTGISTIDVMNSIARGQKIPLFSAAGLPHNEIAAQICRQAGLVKRLEKSDNLLEHQEDDNFAIVFAAMGVNMETAQFFKRDFEENGSMERVTLFLNLANDPTIERIITPRIALTTAEYLAYECGKHVLVILTDMSSYADALREVSAAREEVPGRRGYPGYMYTDLATIYERAGRIEGRKGSITQIPILTMPNDDITHPTPDLTGYITEGQIYIDRQLHNRQIYPPINVLPSLSRLMKSAIGEGMTRRDHSDVSNQL…	927	60469	28	11
90	145	gi|459198|gb|AAA57549.1|	vacuolar H+-ATPase subunit B [Gossypium hirsutum] >gi|2493129|sp|Q43432.1|VATB1_GOSHI RecName: Full=V-type proton ATPase subunit B 1; Short=V-ATPase subunit B 1; AltName: Full=Vacuolar proton pump subunit B 1	MGMAENTNGMEEGTLEIGMEYRTVSGVAGPLVILDKVKGPKYQEIVNIRLGDGTTRRGQVLEVDGEKAVVQVFEGTSGIDNKYTTVQFTGEVLKTPVSLDMLGRIFNGSGKPIDNGPPILPEAYLDISGSSINPSERTYPEEMIQTGISTIDVMNSIARGQKIPLFSAAGLPHNEIAAQICRQAGLVKRLEKTGDLLEDGEEDNFAIVFAAMGVNMETAQFFKRDFEENGSMERVTLFLNLANDPTIERIITPRIALTTAEYLAYECGKHVLVILTDMSSYADALREVSAAREEVPGRRGYPGYMYTDLATIYERAGRIEGRKGSITQIPILTMPNDDITHPTPDLTGYITEGQIYIDRQLHNRQIYPPINVLPSLSRLMKSAIGEGMTRRDHADVSNQ…	927	60370	28	11	2.235		1.129		1.354	*	1.446		3.347	*	1.103		0.571	*
91	146	gi|14594788|emb|CAC43404.1|	ribulose 1,5-bisphophate carboxylase [Calceolaria sp. IUGH]	VGFKAGVKEYKLTYYTPEYETKDTDILAAFRVTPQPGVPPEEAGAAVAAESSTGTWTTVWTDGLTSLDRYKGRCYHIEPVLGEADQYICYVAYPLDLFEEGSVTNMFTSIVGNVFGFKALRALRLEDLRIPPAYVKTFQGPPHGIQVERDKLNKYGRPLLGCTIKPKLGLSAKNYGRAVYECLRGGLDFTKDDENVNSQPFMRWRDRFLFCAEAIYKAQAETGEIKGHYLNATAGTCEEMIKRAVFARELGVPIVMHDYITGGFTANTSLAHYCRDNGLLLHIHRAMHAVIDRQKNHGMHFRVLAKALRMSGGDHIHSGTVVGKLEGERDITLGFVDLLRDDFIEKDRSRGIYFTQDWVSLPGVIPVASGGIRVWHMPALTEIFGDDSVLQFGGGTLGH…	919	56196	66	1	---		---		---		---		---		---		---
92	147	gi|255566442|ref|XP_002524206.1|	Ribulose bisphosphate carboxylase/oxygenase activase 1, chloroplast precursor, putative [Ricinus communis] >gi|223536483|gb|EEF38130.1| Ribulose bisphosphate carboxylase/oxygenase activase 1, chloroplast precursor, putative [Ricinus communis]	MAATISTVGAVNRTPLALNGSGAGSSVPTSAFFGSSLKKLNSPRFSKFSSGSFKVVSEYDEEKQTSADRWGGLAYDMSDDQQDITRGKGMVDSLFQAPQDAGTHYAVMSSYEYLSTGLRQYNLDNNMDGFYIAPAFMDKLVVHITKNFMTLPNIKIPLILGIWGGKGQGKSFQCELVFAKMGINPIMMSAGELESGNAGEPAKLIRQRYREAADMIKKGKMCCLFINDLDAGAGRMGGTTQYTVNNQMVNATLMNIADNPTNVQLPGMYNKEENPRVPIIVTGNDFSTLYAPLIRDGRMEKFYWAPTREDRIGVCTGIFKTDGVAPEDVVKLVDTFPGQSIDFFGALRARVYDDEVRKWIGGVGVEKIGKSLVNSKEGPPTFEQPKMTIEKLLEYGNML…	917	61622	34	2	---		0.425	*	---		---		---		0.509		---
95	152	gi|552890|gb|AAA84647.1|	ribulose 1,5-bisphosphate carboxylase [Sparganium americanum]	KASAGFXAGVKDYKLTYYTPEYETKDTDILAAFRXTPQPGVPPEEAGAAVAAESSTGTWTTVWTDGLTSLDRYKGRCYHIEPVVGEENQYIAYVAYPLDLFEEGSVTNMFTSIVGNVFGFKALRALRLEDLRIPPAYSKTFQGPPHGIQVERDKLNKYGRPLLGCTIKPKLGLSAKNYGRAVYECLRGGLDFTKDDENVNSQPFMRWRDRFLFCAEAXYKAQAETGEIKGHYXNATAGTCEEMIKRAVFARELGVPIVMHDYLTGGFTANTSLAHYCRDNGLLLHIHRAMHAVIDRQKNHGMHFGXLAKAXRMSGGDHIHAGTVVGKLEGEREMTLGFVDLLRDDFIEKDRSRGIFFTQDWVSMPGVIPVASGGIHVWHMPALTEIFGDDSVLQFGGGT…	900	55968	64	3	0.092	*	0.052	*	0.332		0.025	*	0.063		0.137	*	0.093
96	154	gi|17224671|gb|AAL37070.1|	ribulose-1,5-bisphosphate carboxylase/oxygenase large subunit [Burmannia lutescens]	DLFEEGSVTNMFTSIVGNVFGFKALRALRLEDLRIPPAYTKTFQGPPHGIQVERDKLNKYGRPLLGCTIKPKLGLSAKNYGRAVYECLRGGLDFTKDDENVNSQPFMRWRDRFLFCAEAIYKAQDETGEIKGHYLNATAGTCEEMIKRAVCARELGVPIVMHDYLTGGFTANTSLAHYCRDNGLLLHIHRAMHAVIDRQKNHGMHFRVLAKALRLSGGDHIHAGTVVGKLEGDRESTLGFVDLLRDDFVEKDRSRGIFFTQDWVSIPGVLPVASGGIHVWHMPALTEIFGDDSVLQFGGGTLGHPWGNAPGAVANRVALEACVQARNEXRDLAVEGNEIIREASKW	879	43916	60	1	---		---		---		---		---		---		---
97	155	gi|37722344|gb|AAN34911.1|	ribulose-1,5-bisphosphate carboxylase/oxygenase large subunit [Roystonea princeps]	MSPQTETKASVGFKAGVKDYKLTYYTPDYETKDTDILAAFRVTPQPGVPPEEAGAAVAAESSTGTWTTVWTDGLTSLDRYKGRCYHIESVVGEENQYIAYVAYPLDLFEEGSVTNMFTSIVGNVFGFKALRALRLEDLRIPTSYSKTFQGPPHGIQVERDKLNKYGRPLLGCTIKPKLGLSAKNYGRAVYECLRGGLDFTKDDENVNSQPFMRWRDRFLFCAEALYKAQAETGEIKGHYLNATAGTCEEMIKRAVCARELGVPIVXHDYLTGGFTANTSLAHYCRDNGLLLHIHRAMHAVIDRQKNHGMHFRVLAKALRMSGGDHIHAGTVVGKLEGEREMTLGFVDLLRDDFIEKDRSRGIFFTQDWVSMPGVIPVASGGIHVWHMPALTEIFGDDSV…	876	58273	66	1	---		---		---		---		---		---		---
99	157	gi|1050426|emb|CAA58603.1|	ribulose-1,5-bisphosphate carboxylase [Stenostomum lucidum] >gi|6093912|sp|Q31672.1|RBL_ANTLU RecName: Full=Ribulose bisphosphate carboxylase large chain; Short=RuBisCO large subunit	SVGFKAGVKEYKLTYYTPEYQTKDTDILAAFRVTPQPGVPPEEAGAAVRAESSTGTWTTVWTDGLTSLDRYKGRCYHXEAVLGEEDQYIAYVAYPLDLFEEGSVTNMFTSIVGNVFGFKALRALRLEDLRIPNAYIKTFQGPPHGIQVERDKLNKYGRPLLGCTIKPKLGLSAKNYGRAVYECLRGGLDFTKDDENVNSQPFMRWRDRFLFCAEAIYKAQAETGEIKGHYLNATAGTCEEMIKRAVFARELGVPIVMHDYLTGGFTANTSLAHYCRDNGLLLHIHRAMHAVIDRQKNHGMHFRVLAKALRLSGGDHIHAGTVVGKLEGERDITLGFVDLLRDDFIEKDRSRGIYFTQDWVSLPGVXPVASGGIHVWHMPALTEIFGDDXRXQFGGGTLG…	871	60179	64	2	0.482	*	0.806		0.65		0.324		0.355	*	0.337	*	0.47	*
100	158	gi|15187136|gb|AAK91305.1|	ribulose-1,5-bisphosphate carboxylase/oxygenase large subunit [Durio zibethinus]	XDLFEEGSVTNMFTSIVGNVFGFKALRALRLEDLRIPPSYTKTFQGPPHGIQVERDKLNKYGRPLLGCTIKPKLGLSAKNYGRAVYECLRGGLDFTKDDENVNSQPFMRWRDRFLFCAEAIFKAQAETGEIKGHYLNATAGTCEEMIKRAIFARELGAPIVMHDYLTGGFTANTSLAHYCRDNGLLLHIHRAMHAVIDRQKNHGMHFRVLAKALRLSGGDHIHAGTVVGKLEGERDITLGFVDLLRDDFIEKDRSRGIYFTQDWVSIPGVLPVASGGIHVWHMPALTEIFGDDSVLQFGGGTLGHPWGNAPGAVANRVALEACVKAR	867	41691	62	3	0.053	*	1.003		0.204	*	---		0.093		0.104	*	---
101	159	gi|32332099|gb|AAO73531.1|	ribulose-1,5-bisphosphate carboxylase/oxygenase large subunit [Browallia speciosa]	LFEXGSVTNMFTSIVGNVFGFKALRALRLEXLRIPPAYIKTFQGPPHGIQVERDKLNKYGRPLLGCTIKPKLGLSAKNYGRAVYECLRGGLDFTKDDENVNSQPFMRWRDRFLFCAEAIFKSQAETGEIKGHYLNATAGTCEEMIKRAVFARELGVPIVMHDYLTGGFTANTTLAHYCRDNGLLLHIHRAMHAVIDRQKNHGMHFRVLAKALRMSGGDHIHAGTVVGKLEGERDITLGFVDLLRDDFVEQDRSRGIYFTQDWVSLPGVLPVASGGIHVWHMXALTEIFGDXXVLQFGGGTIGHPWGNAPGAVANRVALEACVKARNEGRDLAQEGNEIIREASKWSPELAAACEVWKEIRFVFAAMDTLDGA	861	47100	61	2	---		1.072		---		0.128		---		---		---
103	164	gi|114527|sp|P06450.1|ATPA_SPIOL	RecName: Full=ATP synthase subunit alpha, chloroplastic; AltName: Full=ATP synthase F1 sector subunit alpha; AltName: Full=F-ATPase subunit alpha >gi|20150923|pdb|1KMH|A Chain A, Crystal Structure Of Spinach Chloroplast F1-Atpase Complexed With Tent	MATIRADEISKIIRERIEGYNREVKVVNTGTVLQVGDGIARIHGLDEVMAGELVEFEEGTIGIALNLESNNVGVVLMGDGLMIQEGSSVKATGRIAQIPVSEAYLGRVINALAKPIDGRGEITASESRLIESPAPGIMSRRSVYEPLQTGLIAIDAMIPVGRGQRELIIGDRQTGKTAVATDTILNQQGQNVICVYVAIGQKASSVAQVVTNFQERGAMEYTIVVAETADSPATLQYLAPYTGAALAEYFMYRERHTLIIYDDLSKQAQAYRQMSLLLRRPPGREAYPGDVFYLHSRLLERAAKLSSLLGEGSMTALPIVETQAGDVSAYIPTNVISITDGQIFLSADLFNAGIRPAINVGISVSRVGSAAQIKAMKKVAGKLKLELAQFAELEAFAQF…	841	61862	37	11	---		0.903		1.055		0.103		0.871		2.154		0.09	*
103	164	gi|7636090|emb|CAB88710.1|	ATPase subunit I [Spinacia oleracea]	MGDGLMIQEGSSVKATGRIAQIPVSEAYLGRVINALAKPIDGRGEITASESRLIESPAPGIMSRRSVYEPLQTGLIAIDAMIPVGRGQRELIIGDRQTGKTAVATDTILNQQGQNVICVYVAIGQKASSVAQVVTNFQERGAMEYTIVVAETADSPATLQYLAPYTGAALAEYFMYRERHTLIIYDDLSKQAQAYRQMSLLLRRPPGREAYPGDVFYLHSRLLERAAKLSSLLGEGSMTALPIVETQAGDVSAYIPTNVISITDGQIFLSADLFNAGIRPAINVGISVSRVGSAAQIKAMKKVAGKLKLELAQFAELEAFAQFASDLDKATQNQLARGQRLRELLKQPQSAPLTVEEQVMTIYTGTNGYLDSLELDQVRKYLVELRTYVKTNKPEFQEI…	841	53041	37	11
104	165	gi|170516170|gb|ACB15095.1|	ribulose-1,5-bisphosphate carboxylase/oxygenase large subunit [Papuacedrus papuana]	KASVGFKAGVKDYRLTYYTPEYQTKDTDILAAFRVTPQPGVPPEEAGAAVAAESSTGTWTTVWTDGLTSLDRYKGRCYDIEPVPGEETQFIAYVAYPLDLFEEGSVTNLFTSIVGNVFGFKALRALRLEDLRIPPAYSKTFQGPPHGIQVERDKLNKYGRPLLGCTIKPKLGLSAKNYGRAVYECLRGGLDFTKDDENVNSQPFMRWRDRFCFCAEAIYKAQAETGEIKGHYLNATAGTWEEMIKRAVFARELGVPIVMHDYLTGGFTANTSLAHYCRDNGLLLHIHRAMHAVIDRQRNHGMHFRVLAKALRMSGGDHIHAGTVVGKLEGEREVTLGFVDLLRDDYIEKDRSRGIYFTQDWVSMPGVLPVASGGIHVWHMPALTEIFGDDSVLRFGGGT…	837	57118	62	1
104	165	gi|9909998|emb|CAC04421.1|	ribulose 1,5-bisphosphate carboxylase [Talisia nervosa]	KASVGFKAGVKDYKLTYYTPDYVTKDTDILAAFRVTPQPGVPPEEAGAAVAAESSTGTWTTVWTDGLTSLDRYKGRCYNIEPVAGEENQYICYVAYPLDLFEEGSVTNMFTSIVGNVFGFKALRALRLEDLRIPPAYSKTFQGPPHGIQVERDKLNKYGRPLLGCTIKPKLGLSAKNYGRAVYECLRGGLDFTKDDENVNSQPFMRWRDRFLFCAEALYKAQAETGEIKGHYLTATAGTSEEMIKKAVCARELGVPIVMHDYLTGGFTANTSLAHYCRDNGLLLHIHRAMHAVIDRQKNHGMHFRVLAKALRLSGGDHVHAGTVVGKLEERRDITLGFVDLLRDDFVEKDRSRGIYFTQDWVSLPGVLPVASGGIHVWHMPALTEIFGDDSVLKFGGGT…	837	60492	62	1	---		---		---		---		---		---		---
105	167	gi|4512327|dbj|BAA75231.1|	actin [Glycyrrhiza echinata]	AGFAGDDAPRAVFPSIVGRPRHTGVMVGMGQKDAYVGDEAQSKRGILTLKYPIEHGIVSNWDDMEKIWHHTFYNELRVAPEEHPVLLTEAPLNPKANREKMTQIMFETFNVPAMYVAIQAVLSLYASGRTTGIVLDSGDGVSHTVPIYEGYALPH	826	19211	38	5	2.069	*	1.865		1.817	*	0.604		1.533	*	0.533		---
116	179	gi|300262872|gb|EFJ47076.1|	hypothetical protein VOLCADRAFT_105291 [Volvox carteri f. nagariensis] >gi|302840850|ref|XP_002951971.1| hypothetical protein VOLCADRAFT_105291 [Volvox carteri f. nagariensis]	MQTTMKGSAISGQRVGSARVAARSVRRAQLQVVAASRSQVGRWRNIDADVDTSDDQQDITRGRQMVDDLFQGGFGAGGTHNAVLSSTEYLSQARASFNNIEDGFYISPAFLDKMTIHIAKNFMDLPKIKVPLILGIWGGKGQGKTFQCALAYKKLGISPIVMSAGELESGNAGEPAKLIRTRYREASDIIKKGKMCSLFINDLDAGAGRMGDTTQYTVNNQMVNATLMNIADNPTNVQLPGVYKNEEIPRVPIVCTGNDFSTLYAPLIRDGRMEKYYWNPTREDRIGVCMGIFQEDNVSRGDVERLVDTFPGQSIDFFGALRARVYDDMVRKWIAEVGIEGIGSKLVNGRQKVSFPKVSMSLDVLLKYGRALVDEQENVKRVQLADAYLSGAELAGREG…	733	51971	28	1	---		---		---		---		---		---		---
117	182	gi|222853777|gb|EEE91324.1|	predicted protein [Populus trichocarpa] >gi|224097202|ref|XP_002310874.1| predicted protein [Populus trichocarpa]	MQQSNLRVARIAAHINPPNLQMVEEDLGLERVNCRAKGASSGFKVAILGAAGGIGQPLAMLMKMNPLVSLLHLYDVVNAPGVTADISHMDTSAVVRGFLGQQQLEDALIGMDLVIIPAGVPRKPGMTRDDLFNINAGIVKTLCEAIAKCCPKAIVNIISNPVNSTVPIAAEVFKKAGVFDPKRVLGVTMLDVVRANTFVAEIMGLDPREVDVPVVGGHAGVTILPLLSQVKPLCSFTQKEIDYLTDRIQNGGTEVVEAKAGAGSATLSMAYAAVKFADACLRALRGDAAVVHCAYVASEVTELPFFASKVRLGRNGVEEIYPLGPLNDYERAGLEKAKKELAGSIQKGVSFVKK	718	44622	21	1	---		---		---		---		---		---		---
121	187	gi|301176645|gb|ADK66339.1|	alpha-mannosidase [Solanum lycopersicum]	MKNMGKFEIWFLILMVCGLWVVEAKYMVYNTSQGIVSGKLNVHLVPHTHDDVGWLKTVDQYYVGSNNSIQVACVQNVLDSLIPALLADKNRKFIYVEQAFFQRWWRNQSPGMQSTVKQLVNSGQLEFINGGWCMHDEAATHYIDMIDQTTLGHKYIKQQFNVTPRIGWQIDPFGHSAVQAYLLGAEVGFDSLFFGRIDYQDREKRKIEKSLEVIWRGSKSLSSSTQIFSGAFPQNYEPPSKFYFEVNDDNSLPVQDDVNLFDYNVQERVNDFVAAALSQANITRTNHIMWTMGTDFKYQYAHTWFRNMDKLIHYVNQDGRVNALYSSPSIYTDAKYALDESWPLKTDDYFPYADRINAYWTGYFTSRPALKLYVRMMSGYYLAARQLEFFKGRIETGPT…	704	137000	24	6	1.343		1.531	*	1.982		1.701	*	3.119	*	1.557	*	3.925	*
121	187	gi|315440801|gb|ADU20406.1|	alpha-mannosidase [Capsicum annuum]	MKDMAKCEIWFLILMLCGLVVEAKYMVYNTSQSIVKGKLNVHLVPHSHDDVGWLKTIDQYYVGSNNSIQGACVENVLDSMVPALLADKNRKFIYVEQAFFQRWWRNQSPEIQSTVRQLINSGQLEFINGGWCMHDEAATHYIDMIDQTTLGHRYIKQQFNIAPRIGWQIDPFGHSAVQAYLLGAEVGFDSLFFGRIDYQDREKRKIEKSLEVIWRGSKSLSSSTQIFSGAFPQNYEPPSKFYFEVNDDNSLPVQDDVNLFDYNVQERVNDFVAAALSQANITRTNHIMWTMGTDFKYQYAHTWFRNMDKFIHYVNQDGRVNALYSSPSIYTDAKYALDESWPLKTGDYFPYADRINAYWTGYFTSRPALKLYVRMMSGYYLAARQLEFFKGRSETGGPT…	704	136802	24	6
137	210	gi|121309841|dbj|BAF44222.1|	malate dehydrogenase like-protein [Iris x hollandica]	MAKDPVRVLVTGAAGQIGYALVPMIARGVMLGPDQPVILHMLDIPPAAEALNGVKMELVDAAFPLLKGVIATTDVVEACTGVSIAVMVGGFPRKEGMERKDVMSKNVSIYKSQASALEKYAAANCKVLVVANPANTNALILKEYAPSIPEKNITCLTRLDHNRALGQISERLNVQVSDVKNVIIWGNHSSTQYPDVSHAIVKTESGEKPVPELVSDDAWLRGEFITTVQQRGAAIIKARKLSSALSAASSACDHIRDWVLGTPEGTFVSMGVYSDGSYNVPAGLIYSFPVTCRDGQWTIVQGLSVDE	652	38253	20	6
141	215	gi|3913786|sp|Q42434.1|BIP_SPIOL	RecName: Full=Luminal-binding protein; Short=BiP; AltName: Full=78 kDa glucose-regulated protein homolog; Short=GRP-78; Flags: Precursor >gi|551305|gb|AAA21806.1| ER-lumenal protein [Spinacia oleracea] >gi|219774043|emb|CAW37050.1| unnamed protein p	MAVAWKSRASSIAFGIVLLGSLFAFVSAKDEAPKLGTVIGIDLGTTYSCVGVYKDGKVEIIANDQGNRITPSWVAFTNDERLIGEAAKNQAAANPERTIFDVKRLIGRKFEDKEVQKDMKLVPYKIVNRDGKPYIQVKVQEGETKVFSPEEISAMILTKMKETAETFLGKKIKDAVVTVPAYFNDAQRQATKDAGVIAGLNVARIINEPTAAAIAYGLDKRGGEKNILVFDLGGGTFDVSVLTIDNGVFEVLATNGDTHLGGEDFDQRLMEYFIKLIKKKHTKDISKDNRALGKLRRECERAKRALSSQHQVRVEIESLFDGVDFSEPLTRARFEELNNDLFRKTMGPVKKAMDDAGLEKNQIDEIVLVGGSTRIPKVQQLLKEFFNGKEPSKGVNPDE…	638	93244	25	2	0.946		1.184		0.635		0.898		2.744	*	1.038		0.172
146	220	gi|110740085|dbj|BAF01944.1|	s-adenosylmethionine synthetase like protein [Arabidopsis thaliana]	MESFLFTSESVNEGHPDKLCDQISDAILDACLEQDPESKVACETCTKTNMVMVFGEITTKANVDYEQIVRKTCREIGFVSADVGLDADNCKVLVNIEQQSPDIAQGVHGHLTKKPEEVGAGDQGHMFGYATDETPELMPLTHVLATKLGAKLTEVRKNGTCPWLRPDGKTQVTIEYINESGAMVPVRVHTVLISTQHGETVTNDEIAADLKEHVIKPVIPEKYLDEKTIFHLNPSGRFVIGGPHGDAGLTGRKIIIDTYGGWGAHGGGAFSGKDPTKVDRSGAYIVRQAAKSIVASGLARRVIVQVSYAIGVPEPLSVFVDSYGTGKIPDKEILEIVKESFDFRPGMISINLDLKRGGNGRFLKTAAYGHFGRDDADFTWEVVKPLKSNKVQA	631	51932	18	5
146	220	gi|115361537|gb|ABI95859.1|	S-adenosyl-L-methionine synthase [Nicotiana suaveolens]	METFLFTSESVNEGHPDKLCDQVSDAILDACLEQDPESKVACETCTKTNMVMVFGEITTKATVDYEKIVRDTCRGIGFTSADVGLDADNCKVLVNIEQQSPDIAQGVHGHLTKKPKEIGAGDQGHMFGYATDETPELMPLTHVLATKLGAKLTEVRKNKTCPWLKPDGKTQVTVEYKNDNGAMVPIRVHTVLISTQHDETVTNDQIAQDLKEHVIKPVIPAQYLDEKTIFHLNPSGRFVIGGPHGDAGLTGRKIIIDTYGGWGAHGGGAFSGKDPTKVDRSGAYIVRQAAKSVVASGLARRCIVQVSYAIGVAEPLSVFVDTYKTGTIPDKDILALIKENFDFRPGMMSINLDLLRGGNFRYQKTAAYGHFGRDDPDFTWETVKVLKPKA	631	52455	18	5
146	220	gi|122220255|sp|Q4H1G3.1|METK2_BETVU	RecName: Full=S-adenosylmethionine synthase 2; Short=AdoMet synthase 2; AltName: Full=Methionine adenosyltransferase 2; Short=MAT 2 >gi|71000465|dbj|BAE07180.1| S-adenosyl-L-methionine synthetase [Beta vulgaris]	METFLFTSESVNEGHPDKLCDQVSDAVLDACLAQDPESKVACETCTKTNMVMVFGEITTKAEVDYEKIVRDTCRSIGFTSDDVGLDADKCKVLVNIEQQSPDIAQGVHGHLTKRPEEIGAGDQGHMFGYATDETPELMPLSHVLATKLGARLTEVRKNGACAWLRPDGKTQVTVEYYNDNGAMVPVRVHTVLISTQHDETVSNDEIAADLKEHVIKPVIPEKYLDEKTIFHLNPSGRFVIGGPHGDAGLTGRKIIIDTYGGWGAHGGGAFSGKDPTKVDRSGAYIVRQAAKSIVANGLARRAIVQVSYAIGVPEPLSVFVDTYGTGKIPDKEILKIVKETFDFRPGMMSINLDLKRGGNGRFQKTAAYGHFGRDDPDFTWEVVKPLKWEKIPA	631	52155	18	5
146	220	gi|139478060|gb|ABO77438.1|	S-adenosyl-L-methionine synthetase [Medicago sativa subsp. falcata] >gi|223635319|sp|A4ULF8.1|METK_MEDFA RecName: Full=S-adenosylmethionine synthase; Short=AdoMet synthase; AltName: Full=Methionine adenosyltransferase; Short=MAT	MATETFLYTSESVNEGHPDKLCDQISDAVLDACLEQDPDSKVACETCTKTNMVMVFGEITTKANVDYEKIVRNTCRNIGFVSDDVGLDADNCKVLVNIEQQSPDIAQGVHGHLTKRPEEIGAGDQGHMFGYATDETPELMPLTHVLATKLGAKLTEVRKNGTCPWLRPDGKTQVTIEYFNDKGAMVPIRVHTVLISTQHDETVTNDEIAADLKQHVIKPVIPEKYLDEKTIFHLNPSGRFVIGGPHGDAGLTGRKIIIDTYGGWGAHGGGAFSGKDPTKVDRSGAYIVRQAAKSIVANGLARRCIVQVSYAIGVPEPLSVFVDSYGTGKIPDKEILNIVKETFDFRPGMISINLDLKRGGNNRFLKTAAYGHFGRDDADFTWEVVKPLKGGKLATA	631	52410	18	5
146	220	gi|145049666|gb|ABP35525.1|	S-adenosyl-L-methionine synthetase [Ipomoea batatas]	METFLFTSESVNEGHPDKLCDQVSDAVLDACLAQDPESKVACETCTKTNMVMVFGEITTKAEIDYEKIVRDTCRAIGFVSDDVGLDADNCKVLVNIEQQSPDIAQGVHGHLTKRPEDIGAGDQGHMFGYATDETPELMPLSHVLATKLGARLTEVRKDGTCAWLRPDGKTQVTVEYYNDNGAMVPVRVHTVLISTQHDETVTNDEIARDLKEHVIKPVIPEKYLDEKTIFHLNPSGRFVIGGPHGDAGLTGRKIIIDTYGGWGAHGGGAFSGKDPTKVDRSGAYVVRQAAKSIVANGLARRCIVQVSYAIGVPEPLSVFVDTYGTGKIPDKEILKIVKEHFDFRPGMIAINLDLKRGGNSRFLKTAAYGHFGRDDPDFTWEVVKPLKWDKPQA	631	52042	18	5
146	220	gi|147772088|emb|CAN75687.1|	hypothetical protein [Vitis vinifera]	METFLFTSESVNEGHPDKLCDQISDAVLDACLQQDPDSKVACETCTKTNMVMVFGEITTKANVDYEKIVRDTCREIGFVSDDVGLDADNCKVLVNIEQQSPDIAQGVHGHLTKRPEEIGAGDQGHMFGYATDETPELMPLSHVLATKLGARLTEVRKNGTCPWLRPDGKTQVTVEYHNDGGARVPIRVHTVLISTQHDETVTNDEIAADLKEHVIKPVIPEKYLDEKTIFHLNPSGRFVIGGPHGDAGLTGRKIIIDTYGGWGAHGGGAFSGKDPTKVDRSGAYIVRQAAKSIVANGLARRCIVQVSYAIGVPEPLSVFVDXYGTGKIPDREILKIVKENFDFRPGMISINLDLKRGGNGRFLKTAAYGHFGRDDPDFTWEVVKPLKWEKTQA	631	51766	18	5
146	220	gi|147791974|emb|CAN75334.1|	hypothetical protein [Vitis vinifera]	METFLFTSESVNEGHPDKLCDQISDAVLDACLQQDPDSKVACETCTKTNMVMVFGEITTKANVDYEKIVRDTCREIGFVSDDVGLDADNCKVLVNIEQQSPDIAQGVHGHLTKRPEEIGAGDQGHMFGYATDETPELMPLSHVLATKLGARLTEVRKNGTCPWLRPDGKTQVTVEYHNDGGARVPIRVHTVLISTQHDETVTNDEIAADLKEHVIKPVIPEKYLDEKTIFHLNPSGRFVIGGPHGDAGLTGRKIIIDTYGGWGAHGGGAFSGKDPTKVDRSGAYIVRQAAKSIVANGLARRCIVQVSYAIGVPEPLSVFVDSYGTGKIPDREILKIVKENFDFRPGMISINLDLKRGGNGRFLKTAAYGHFGRDDPDFTWEVVKPLKWEKTQA	631	51742	18	5
146	220	gi|1655576|emb|CAA95856.1|	S-adenosyl-L-methionine synthetase 1 [Catharanthus roseus] >gi|3024126|sp|Q96551.1|METK1_CATRO RecName: Full=S-adenosylmethionine synthase 1; Short=AdoMet synthase 1; AltName: Full=Methionine adenosyltransferase 1; Short=MAT 1	METFLFTSESVNEGHPDKLCDQISDAVLDACLEQDPDSKVACETCTKTNMVMVFGEITTKATVDYEKIVRDTCRSIGFVSDDVGLDADNCKVLVNIEQQSPDIAQGVHGHLTKRPEEIGAGDQGHMFGYATDETPEFMPLSHVLATKLGARLTEVRKNGTCPWLRPDGKTQVTVEYYNENGAMVPVRVHTVVISTQHDETVTNDQIAADLKEHVIKPVIPEKYLDERTIFHLNPSGRFVIGGPHGDAGLTGRKIIIDTYGGWGAHGGGAFSGKDPTKVDRSGAYIVRQAAKSIVANGLARRCIVQVSYAIGVPEPLSVFVDTYGTGKIPDKEILKIVKENFDFRPGMIAINLDLKRGGSGRFLKTAAYGHFGRDDPDFTWEVVKPLKWEKAAN	631	51692	18	5
146	220	gi|1655578|emb|CAA95857.1|	S-adenosyl-L-methionine synthetase 2 [Catharanthus roseus] >gi|3024127|sp|Q96552.1|METK2_CATRO RecName: Full=S-adenosylmethionine synthase 2; Short=AdoMet synthase 2; AltName: Full=Methionine adenosyltransferase 2; Short=MAT 2	METFLFTSESVNEGHPDKLCDQISDAVLDACLAQDPESKVACETCTKTNMVMVFGEITTKAQVDYEKIVRDTCRAIGFVSDDVGLDADNCKVLVNIEQQSPDIAQGVHGHLTKRPEEIGAGDQGHMFGYATDETPELMPLSHVLATKLGARLTEVRKNGTCPWLRPDGKTQVTVEYYNDNGAMVPIRVHTVLISTQHDETVTNDEIAADLKEHVIKPVVPEKYLDEKTIFHLNPSGRFVIGGPHGDAGLTGRKIIIDTYGGWGAHGGGAFSGKDPTKVDRSGAYIVRQAAKSIVASGLARRCIVQVSYAIGVPEPLSVFVDTYGTGKIPDKEILKIVKENFDFRPGMIAINLDLKRGGNSRFLKTAAYGHFGREDPDFTWEVVKPLKFEKVEA	631	51951	18	5
146	220	gi|219522345|gb|ACL14492.1|	S-adenosylmethionine synthetase [Cicer arietinum] >gi|219522343|gb|ACL14491.1| S-adenosylmethionine synthetase [Cicer arietinum]	MATETFLFTSESVNEGHPDKLCDQISDAVLDACLEQDPDSKVACETCTKTNMVMVFGEITTKANVDYEKIVRDTCRNIGFVSDDVGLDADNCKVLVNIEQQSPDIAQGVHGHLTKRPEEIGAGDQGHMFGYATDETPEFMPLSHVLATKLGAKLTEVRKNGTCPWLRPDGKTQVTVEYYNDKGAMVPIRVHTVLISTQHDETVTNDEIAADLKEHVIKPVIPEKYLDEKTIFHLNPSGRFVIGGPHGDAGLTGRKIIIDTYGGWGAHGGGAFSGKDPTKVDRSGAYIVRQAAKSIVASALARRCLVQVSYAIGVPEPLSVFVDSYGTGKIPDKEILQIVKENFDFRPGMISINLDLLRGGNKRFLKTAAYGHFGRDDADFTWEVVKPLKSEKVPTA	631	52545	18	5
146	220	gi|223635286|sp|A9PHC5.1|METK4_POPTR	RecName: Full=S-adenosylmethionine synthase 4; Short=AdoMet synthase 4; AltName: Full=Methionine adenosyltransferase 4; Short=MAT 4 >gi|222833395|gb|EEE71872.1| s-adenosylmethionine synthetase 6 [Populus trichocarpa] >gi|118487913|gb|ABK95778.1| unk	MDTFLFTSESVNEGHPDKLCDQVSDAILDACLAQDPESKVACETCSKTNMVMVFGEITTKANVDYEKIVRDTCRGIGFTSADVGLDADNCKVLVNIEQQSPDIAQGVHGHLTKKPEEIGAGDQGHMFGYATDETPELMPLTHVLATKLGAKLTEVRKNKTCPWLRPDGKTQVTVEYKNEGGAMVPIRVHTILISTQHDENVTNEQIAADLKEHVIKPVIPVQYLDDKTIFHLNPSGRFVIGGPHGDAGLTGRKIIIDTYGGWGAHGGGAFSGKDPTKVDRSGAYIVRQAAKSVVASGLARRCIVQVSYAIGVPEPLSVFVDTYKTGKIPDRDILELIKENFDFRPGMIAINLDLMRGGNSRYQKTAAYGHFGRDDPDFTWETVKLLKPNA	631	51516	18	5
146	220	gi|225432155|ref|XP_002266358.1|	PREDICTED: hypothetical protein [Vitis vinifera] >gi|223635284|sp|A7NVX9.1|METK2_VITVI RecName: Full=S-adenosylmethionine synthase 2; Short=AdoMet synthase 2; AltName: Full=Methionine adenosyltransferase 2; Short=MAT 2	METFLFTSESVNEGHPDKLCDQISDAVLDACLQQDPDSKVACETCTKTNMVMVFGEITTKANVDYEKIVRDTCREIGFVSDDVGLDADNCKVLVNIEQQSPDIAQGVHGHLTKRPEEIGAGDQGHMFGYATDETPELMPLSHVLATKLGARLTEVRKNGTCPWLRPDGKTQVTVEYHNDGGARVPIRVHTVLISTQHDETVTNDEIAADLKEHVIKPVIPEKYLDEKTIFHLNPSGRFVIGGPHGDAGLTGRKIIIDTYGGWGAHGGGAFSGKDPTKVDRSGAYIVRQAAKSIVANGLARRCIVQVSYAIGVPEPLSVFVDTYGTGKIPDREILKIVKENFDFRPGMISINLDLKRGGNGRFLKTAAYGHFGRDDPDFTWEVVKPLKWEKTQA	631	51756	18	5
146	220	gi|225437708|ref|XP_002280106.1|	PREDICTED: hypothetical protein [Vitis vinifera] >gi|223635289|sp|A7Q0V4.1|METK5_VITVI RecName: Full=S-adenosylmethionine synthase 5; Short=AdoMet synthase 5; AltName: Full=Methionine adenosyltransferase 5; Short=MAT 5	METFLFTSESVNEGHPDKLCDQISDAVLDACLAQDPDSKVACETCTKTNMVMVFGEITTKADIDYEKIVRDTCRTIGFVSDDVGLDADNCKVLVNIEQQSPDIAQGVHGHLTKRPEEIGAGDQGHMFGYATDETPELMPLSHVLATKLGARLTEVRKNGTCSWLRPDGKTQVTVEYHNENGAMVPLRVHTVLISTQHDETVTNDEIAADLKEHVIKPVIPEKYLDEKTIFHLNPSGRFVIGGPHGDAGLTGRKIIIDTYGGWGAHGGGAFSGKDPTKVDRSGAYIVRQAAKSIVANGLARRCIVQVSYAIGVPEPLSVFVDSYGTGKIPDKEILKIVKENFDFRPGMIAINLDLKRGGNGRFLKTAAYGHFGRDDPDFTWEVVKPLKWEKA	631	51740	18	5
146	220	gi|255543014|ref|XP_002512570.1|	s-adenosylmethionine synthetase, putative [Ricinus communis] >gi|223548531|gb|EEF50022.1| s-adenosylmethionine synthetase, putative [Ricinus communis]	MDTYASQVARMETFLFTSESVNEGHPDKLCDQVSDAILDACLEQDPDSKVACETCTKTNMVMVFGEITTKANVDYEKIVRDTCRAIGFVSDDVGLDADKCKVLVNIEQQSPDIAQGVHGHLTKRPEEIGAGDQGHMFGYATDETPEFMPLSHVLATKLGARLTEVRKNGTCPWLRPDGKTQVTVEYYNDNGAMVPVRVHTVLISTQHDETVTNDEIAADLKEHVIKPVIPEKYLDEKTIFHLNPSGRFVIGGPHGDAGLTGRKIIIDTYGGWGAHGGGAFSGKDPTKVDRSGAYIVRQAAKSIVANGLARRCIVQVSYAIGVPEPLSVFVDTYGTGKIPDKEILKIVKESFDFRPGMISINLDLKRGGNGRFLKTAAYGHFGRDDSDFTWEVVKPLKWE…	631	53511	18	5
146	220	gi|27363324|gb|AAO11581.1|	At3g17390/MGD8_20 [Arabidopsis thaliana] >gi|14335070|gb|AAK59799.1| AT3g17390/MGD8_20 [Arabidopsis thaliana] >gi|11994556|dbj|BAB02743.1| S-adenosylmethionine synthase [Arabidopsis thaliana] >gi|23397143|gb|AAN31855.1| putative s-adenosylmethionine	MESFLFTSESVNEGHPDKLCDQISDAILDACLEQDPESKVACETCTKTNMVMVFGEITTKANVDYEQIVRKTCREIGFVSADVGLDADNCKVLVNIEQQSPDIAQGVHGHLTKKPEEVGAGDQGHMFGYATDETPELMPLTHVLATKLGAKLTEVRKNGTCPWLRPDGKTQVTIEYINESGAMVPVRVHTVLISTQHDETVTNDEIAADLKEHVIKPVIPEKYLDEKTIFHLNPSGRFVIGGPHGDAGLTGRKIIIDTYGGWGAHGGGAFSGKDPTKVDRSGAYIVRQAAKSIVASGLARRVIVQVSYAIGVPEPLSVFVDSYGTGKIPDKEILEIVKESFDFRPGMISINLDLKRGGNGRFLKTAAYGHFGRDDADFTWEVVKPLKSNKVQA	631	51990	18	5
146	220	gi|48093937|gb|AAT40304.1|	S-adenosylmethionine synthase [Medicago sativa]	METFLFTSESVNEGHPDKLCDQISDAVLDACLEQDVDSKVACETCTKTNMVMVFGEITTKAKVDYEKIVRDTCRKIGFVSDDVGLDADNCKVLVNIEQQSPDIAQGVHGHLTKRPEEIGAGDQGHMFGYATDETPELMPLSHVLATKLGARLTEVRKNGTCPWLRPDGKTQVTVEYYNDNGAMVPVRVHTVLISTQHDETVTNDEIAADLKEHVIKPVIPEKYLDSKTIFHLNPSGRFVIGGPHGDAGLTGRKIIIDTYGGWGAHGGGAFSGKDPTKVDRSGAYIVRQAAKSIVASGLARRCIVQVSYAIGVPEPLSVFVDTYGTGKIPDKEILNIVKQNFDFRPGMISINLDLLRGGNGRFLKTAAYGHFGREDADFTWEVVKPLKWEKA	631	51753	18	5
146	220	gi|726032|gb|AAA81379.1|	S-adenosylmethionine synthetase [Actinidia chinensis] >gi|1709006|sp|P50303.1|METK3_ACTCH RecName: Full=S-adenosylmethionine synthase 3; Short=AdoMet synthase 3; AltName: Full=Methionine adenosyltransferase 3; Short=MAT 3	QDPDSKVACETCTKTNMVMVFGEITTKGNIDYEKIVRDTCRNIGFVSDDVGLDADNCKVLVNIEQQSPDIAQGVHGHLTKRPEEIGAGDQGHMFGYATDETPELMPLSHVLATKLGARLTEVRKDGTCPWLRPDGKTQVTIEYYNENGAMVPIRVHTVLISTQHDETVTNDKIAADLKEHVIRPVIPEKYLDEKTIFHLNPSGRFVIGGPHGDAGLTGRKIIIDTYGGWGAHGGGAFSGKDPTKVDRSGAYIVRQAAKSIVASGLARRCIVQVSYAIGVPEPLSVFVDTYGTGKIPDKEILKIVKESFDFRPGMIAIHLDLKRGGNGRFLKTAAYGHFGRDDADFTWEVVKPLKWEKPQD	631	48044	18	5
146	220	gi|75297911|sp|Q84MM2.1|METK_LITCN	RecName: Full=S-adenosylmethionine synthase; Short=AdoMet synthase; AltName: Full=Methionine adenosyltransferase; Short=MAT >gi|30142157|gb|AAP13994.1| S-adenosylmethionine synthetase [Litchi chinensis]	METFLFTSESVNEGHPDKLCDQVSDAVLDACLAQDPDSKVACETCTRTNMVMVFGEITTKANVDYEQIVRDTCRSIGFTSDDVGLDADNCKVLVNIEQQSPDIAQGVHGHLTKKPEEIGAGDQGHMFGYATDETPELMPLSHVLATKLGARLTEVRKNGTCAWLRPDGKTQVTVEYYNGNGAMVPVRVHTVLISTQHDETVTNDEIAADLKQHVIKPVIPEKYLDEKTIFHLNPSGRFVIGGPHGDAGLTGRKIIIDTYGGWGAHGGGAFSGKDPTKVDRSGAYIVRQAAKSIVASGLARRCIVQVSYAIGVPEPLSVFVDSYGTGKIPDREILKIVKENFDFRPGMISVNLDLKRGGNGRFLKTAAYGHFGREDPDFTWEVVKPLKWDKVQA	631	51243	18	5
146	220	gi|75309266|sp|Q9FPL6.1|METK2_SUASA	RecName: Full=S-adenosylmethionine synthase 2; Short=AdoMet synthase 2; AltName: Full=Methionine adenosyltransferase 2; Short=MAT 2 >gi|11992267|gb|AAG42490.1| S-adenosylmethionine synthetase 2 [Suaeda salsa]	MESFLFTSESVNEGHPDKLCDQVSDAVLDACLAQDPDSKVACETCTKTNMVMVFGEITTKANIDYEKIVRDTCRSIGFVSADVGLDADNCKVLVNIEQQSPDIAQGVHGHLTKRPEDVGAGDQGHMFGYATDETPELMPLSHVLATKLGARLTEVRKNGTCAWLRPDGKTQVTVEYNNDNGAMVPIRVHTVLISTQHDETVTNEQIAADLKEHVIKPVIPEKYLDDKTIFHLNPSGRFVIGGPHGDAGLTGRKIIIDTYGGWGAHGGGAFSGKDPTKVDRSGAYIVRQAAKSIVANGLARRAIVQVSYAIGVPEPLSVFVDTYGTGKIPDKDILKIVKENFDFRPGMISINLDLKRGGNARFQKTAAYGHFGRDDPDFTWETVKPLKWEKVPASS	631	51899	18	5
146	220	gi|75309777|sp|Q9FUZ1.1|METK2_BRAJU	RecName: Full=S-adenosylmethionine synthase 2; Short=AdoMet synthase 2; AltName: Full=Methionine adenosyltransferase 2; Short=MAT 2 >gi|10443981|gb|AAG17666.1| S-adenosylmethionine synthetase [Brassica juncea]	MESFLFTSESVNEGHPDKLCDQISDAILDACLEQDPESKVACETCTKTNMVMVFGEITTKANVDYEKIVRETCREIGFISDDVGLDADNCKVLVNIEQQSPDIAQGVHGHLTKKPEEIGAGDQGHMFGYATDETPELMPLSHVLATKLGAKLTEVRKNGTCAWLRPDGKTQVTVEYFNENGAMVPVRVHTVLISTQHDETVTNDEIAADLKEHVIKPVIPEKYLDEKTIFHLNPSGRFVIGGPHGDAGLTGRKIIIDTYGGWGAHGGGAFSGKDPTKVDRSGAYIVRQAAKSIVASGLARRCIVQVSYAIGVPEPLSVFVDSYGTGKIPDKEILEIVKESFDFRPGMISINLDLKRGGNGRFLKTAAYGHFGRDDADFTWEVVKPLKSNKVQA	631	52131	18	5
146	220	gi|7594741|dbj|BAA94605.1|	s-adenosylmethionine synthetase [Camellia sinensis] >gi|7340731|emb|CAB83039.1| s-adenosylmethinonine synthetase [Camellia sinensis] >gi|75311075|sp|Q9LDQ7.1|METK_CAMSI RecName: Full=S-adenosylmethionine synthase; Short=AdoMet synthase; AltName: Ful	METFLFTSESVNEGHPDKLCDQISDAVLDACLEQDQDSKVACETCTKTNMVMVFGEITTKAAVDYEKIVRDTCRTIGFVSDDVGLDADNCKVLVNIEQQSPDIAQGVHGHLTKRPEEIGAGDQGHMFGYATDETSELMPLSHVLATKLGARLTEVRKNGTCPWLRPDGKTQVTVEYYNEKGATVPIRVHTLLISTQHDETVTNDEIAADLKEHVIKPVIPDKYLDEKTIFHLNPSGRFVIGGPHGDAGLTGRKIIIDTYGGWGAHGGGAFSGKDPTKVDRSGAYIVRQAAKSIVANGLARRCIVQVSYAIGVPEPLSVFVDTYGTGKIPDKEILKIVKESFDFRPGMIAINLDLKRGGNSRFLKTAAYGHFGRDDPDFTWESGEAPQVGQTSS	631	51139	18	5
155	231	gi|302809252|ref|XP_002986319.1|	hypothetical protein SELMODRAFT_157966 [Selaginella moellendorffii] >gi|300145855|gb|EFJ12528.1| hypothetical protein SELMODRAFT_157966 [Selaginella moellendorffii]	MVATRGAEVEFETKVFTKEKVTLGGKDEFIVRGGRHLFEKLPEAFKGIKQIGVLGWGSQGPAQAQNLRDSLEAVKSDIVVKIGLRKGSKSAADARAAGFTEENGTLGDVIETVAGSDLVLLLISDAAQADNFREIFAALKPKAILGLSHGFLLGHLESIGEKFPKDISVIAVCPKGMGPSVRRLYVQGKEVNGAGINASFAVHQDVDGRATDVALGWSVALGSPFTFVTTLEDEYKSDIYGERGILLGAVHGLVEALYRRYTGNGMSEEAAYKNTVESVTGTISKTISSKGMVSLYRSLSDEGKKEFEAAFCASYYPAMDVLYEIYDEVSSGNEIRSVVLAGRRFSARGGLPAFPMGTIDQTHMWKVGEKVRAARPEGDLGPLHPFTAGVYVAVMMAQI…	610	65445	23	18	6.446		1.627	*	1.066		7.786		0.205		1.055	*	0.305	*
158	235	gi|74053562|sp|Q40665.2|TBB3_ORYSJ	RecName: Full=Tubulin beta-3 chain; AltName: Full=Beta-3-tubulin >gi|52076995|dbj|BAD46004.1| beta-tubulin R2242 [Oryza sativa Japonica Group] >gi|52077238|dbj|BAD46281.1| beta-tubulin R2242 [Oryza sativa Japonica Group] >gi|125556434|gb|EAZ02040.1|	MREILHIQGGQCGNQIGAKFWEVICDEHGIDHTGKYSGDSDLQLERINVYYNEASGGRYVPRAVLMDLEPGTMDSVRSGPYGQIFRPDNFVFGQSGAGNNWAKGHYTEGAELIDSVLDVVRKEAENCDCLQGFQVCHSLGGGTGSGMGTLLISKIREEYPDRMMLTFSVFPSPKVSDTVVEPYNATLSVHQLVENADECMVLDNEALYDICFRTLKLATPTFGDLNHLISATMSGVTCCLRFPGQLNSDLRKLAVNLIPFPRLHFFMVGFAPLTSRGSQQYRALTVPELTQQMWDAKNMMCAADPRHGRYLTASAMFRGKMSTKEVDEQMLNVQNKNSSYFVEWIPNNVKSSVCDIPPIGLKMASTFIGNSTSIQEMFRRVSEQFTAMFRRKAFLHWYT…	601	55583	22	1	---		---		---		---		---		---		---
159	236	gi|37574478|gb|AAM98365.1|	ribulose 1,5-bisphosphate carboxylase/oxygenase [Pogonatum pensilvanicum]	QYETKDXXXXXXXXXXXXXXTDILAAFRMTPQPGVPPEEAGAAVAAESSTGTWTTVWTDGLTSLDRYKGRCYDIEPVAGEENQXIAYVAYPLDLFEEGSVTNLFTSIVGNVFGFKALRALRLEDLRIPPAYVKTFQGPPHGIQVERDKLNKYGRPLLGCTIKPKLGLSAKNYGRAVYECLRGGLDFTKDDENVNSQPFMRWRDRFLFVAEAIFKSQAETGEIKGHYLNATAGTCEEMIKRAEFARELGXPIVMHDYLTGGFTAN	595	33824	40	4	---		0.352	*	0.186	*	0.036	*	0.052	*	0.114	*	0.04
160	239	gi|61659100|gb|AAX49653.1|	ribulose-1,5-bisphosphate carboxylase/oxygenase large subunit [Pinus virginiana] >gi|61659114|gb|AAX49660.1| ribulose-1,5-bisphosphate carboxylase/oxygenase large subunit [Pinus virginiana] >gi|61659112|gb|AAX49659.1| ribulose-1,5-bisphosphate carbo	QGPPHGIQVERDKLNKYGRPLLGCTIKPKLGLSAKNYGRAVYECLRGGLDFTKDDENVNSQPFMRWRDRFVFCAEAIYKAQAETGEIKGHYLNATAGTCEEMMKRAIFARELGVPIIMHDYLTGGFTANTSLAHYCRDNGLLLHIHRAMHAVIDRQKIHGMHFRVL	587	22451	44	2	0.077		0.498	*	0.867		0.105	*	0.48	*	0.422	*	0.5	*
160	239	gi|61659146|gb|AAX49676.1|	ribulose-1,5-bisphosphate carboxylase/oxygenase large subunit [Pinus echinata] >gi|61659140|gb|AAX49673.1| ribulose-1,5-bisphosphate carboxylase/oxygenase large subunit [Pinus echinata] >gi|61659102|gb|AAX49654.1| ribulose-1,5-bisphosphate carboxyla	QGPPHGIQVERDKLNKYGRPLLGCTIKPKLGLSAKNYGRAVYECLRGGLDFTKDDENVNSQPFMRWRDRFVFCAEAIYKAQAETGEIKGHYLNATAGTCEEMMKRVIFARELGVPIVMHDYLTGGFTANTSLAHYCRDNGLLLHIHRAMHAVIDRQRIHGMHFRVL	587	22189	44	2
168	252	gi|21105258|gb|AAM34575.1|	ribulose-1,5-bisphosphate carboxylase/oxygenase large subunit [Isoetes coromandelina]	YYTPDYKTKDTDILAAFRMTPQPGVPPEEAGAAVAAESSTGTWTTVWTDGLTSLDRYKGRCYDIEPVAGEENQYIAYVAYPLDLFEEGSVTNMFTSIVGNVFGFKALRALRLEDLRIPPAYSKTFQGPPHGIQVERDKLNKYGRPLLGCTIKPKLGLSAKNYGRAVYECLRGGLDFTKDDENVNSQPFMRWRDRFLFVAEALNKSQAETGEIKGHYLNATAGTCEEMMKRAVFARELGXPIVMHD	549	32173	42	4	0.209	*	0.897		0.421	*	0.454	*	0.806	*	0.47	*	0.529	*
170	254	gi|46325913|gb|AAS88137.1|	ribulose-1,5-bisphosphate carboxylase/oxygenase large subunit [Polanisia dodecandra]	TYYTPEYETKDTDILAAFRVTPQPGVPPEEAGAAVAAESSTGTWTTVWTDGLTSLDRYKGRCYHIEPVAGEENQYIAYVAYPLDLFEEGSVTNMFTSIVGNVFGFKALAALRLEDLRIPPAYTKTFQGPPHGIQVERDKLNKYGRPLLGCTIKPKLGLSAKNYGRAVYECLRGGLDFTKDDENVNSQPFMRWRDRFLFCAEALYKAQTETGEIKGHYLNATAGTCEEMIKRAVFARELGVPIVMHDYLTGGFTANTSLAHY	544	33594	40	1	---		---		---		---		---		---		---
170	254	gi|46325915|gb|AAS88138.1|	ribulose-1,5-bisphosphate carboxylase/oxygenase large subunit [Wislizenia refracta]	TYYTPEYETKDTDILAAFRVTPGAGVPPEEAGAAVAAESSTGTWTTVWTDGLTSLDRYKGRCYHIEPVPGEENQYIAYVAYPLDLFEEGSVTNMFTSIVGNVFGFKALAALRLEDLRIPPAYTKTFQGPPHGIQVERDKLNKYGRPLLGCTIKPKLGLSAKNYGRAVYECLRGGLDFTKDDENVNSQPFMRWRDRFLFCAEALFKAQTETGEIKGHYLNATAGTCEEMIKRAVFARELGVPIVMHDYLTGGFTANTSLAHY	544	33507	40	1
172	257	gi|223533169|gb|EEF34926.1|	dtdp-glucose 4-6-dehydratase, putative [Ricinus communis] >gi|255573008|ref|XP_002527434.1| dtdp-glucose 4-6-dehydratase, putative [Ricinus communis]	MANRVDLDGRPIKEMTICMIGAGGFIGSHLCEKILNETPHKILALDVYNDKIKHLLEPDSLPWAGRIQFHRINIKHDSRLEGLIKMADLTINLAAICTPADYNTRPLDTIYSNFIDALPVVKYCSENNKRLIHFSTXXSYFSWDPAYYILKEDESPCIFGSIEKQRWSYACAKQLIERLIYAEGAENGLEFTIVRPFNWIGPRMDFIPGIDGPSEGVPRVLACFSNALLRGEPLKLVDGGQSQRTFVYIKDAIEAVLLMIENPARANGHIFNVGNPHNEVTVKQLAEMMTEVYSKVSGEPVLEVPTVDISSKEFYGEGYDDSDKRIPDMTIINRQLGWNPKTSLWDLLESTLTYQHRTYAEAIKKVLAKPTSS	537	49493	15	15	0.607	*	0.7		0.656	*	0.98		0.51	*	0.892	*	0.429	*
174	259	gi|188526499|gb|ACD62225.1|	ribulose-1,5-bisphosphate carboxylase/oxygenase large subunit [Englerina ramulosa]	GVKEYKLTYYTPDYETKDTDILAAFRVTPQPGVPPEEAGAAVAAESSTGTWTTVWTDGLTSLDRYKGRCYHIEPVAGEENQYIAYVAYPLDLFEEGSVTNMFTSIVGNVFGFKALRALRLEDLRIPPAYSKTFQGPPHGIQVERDKLNKYGRPLLGCTIKPKLGLSAKNYGRAVYECLRGGLDFTKDDENVNSQPFMRWRDRFLFCAEALYKAQTETGEIKGHYLNATAGTCEEMIKRAVFARELGVPIVMHDYLTVGFTANTSLAHYCRDNGLLLH	537	36198	44	2	---		0.425	*	0.137		---		0.132	*	0.099	*	0.022	*
181	266	gi|50284513|dbj|BAD29709.1|	S-adenosyl-L-methionine synthase 3 [Atriplex nummularia] >gi|75290372|sp|Q6F3F0.1|METK3_ATRNU RecName: Full=S-adenosylmethionine synthase 3; Short=AdoMet synthase 3; AltName: Full=Methionine adenosyltransferase 3; Short=MAT 3 >gi|50284517|dbj|BAD297	MAAAVDTFLFTSESVNEGHPDKLCDQISDAVLDACLAQDPESKVACETCTKTNLVMVFGEITTKANVDYEKIVRQTCRDIGFVSADVGLDADNCKVLVNIEQQSPDIAQGVHGHLTRRPEEIGAGDQGHMFGYATDETPELMPLSHVLATKLGARLTEVRKNGTCPWLRPDGKTQVTVEYYNENGAMVPIRVHTVLISTQHDETVTNDEIAADLKEHVIKPVIPEKYLDEKTIFHLNPSGRFVIGGPHGDAGLTGRKIIIDTYGGWGAHGGGAFSGKDPTKVDRSGAYIARQAAKSIVAAGLARRCIVQISYAIGVPEPLSVFVDTYGTGKIPDKEILKIVKESFDFRPGMIAINLDLLKGGSRYLKTAAYGHFGRDDADFTWETVKPLKWEKPQA	525	51782	14	2	0.671		0.481		0.551		0.486		1.179		0.986		0.62
182	267	gi|262410515|gb|ACY66804.1|	triosphosphate isomerase-like protein type II [Dimocarpus longan]	MARKFIVGGNWKCNGTTEEVKKIVNVLNEGQVPSSEVVEVVVSPPFVFLPLVKSLLRPDFHVAAQNCWVKKGGAFTGEVSAEMLVNLGIPWVILGHSERRLILNESNEFVGDKVVYALAQGLKVIACVGETLEQREAGSTMAVVAAQTKAIAEQVSNWSNVVLAYEPVWAIGTGKVATPAQAQEVHFELRKWLHANTSPEVAASTRIIYGGSVNGANCKELAAQPDVDGFLVGGASLKPEFIDIIKSAEVKKNA	523	32965	17	2	---		0.711		11.722		29.456		1.984	*	1.562		---
198	285	gi|21311559|gb|AAM46780.1|AF467803_1	latex plastidic aldolase-like protein [Hevea brasiliensis]	MASASLLKSSPVLDRSEFVKGQSLRQPSASIIRCHPASSSALTILAGSYADELVKTAKTVASPGRGILAMDESNATCGKRLASIGLENTEANRQAYRTLLVTAPGLGQYISGAILFEETLYQSTTDGKKMVDVLIEQNIVPGIKVDKGLVPLPGSNNESWCQGLDGLASRTAAYYQQGARFAKWRTVVSIPNGPSALAVKEAAWGLARYAAISQDNGLVPIVEPEILLDGEHGIDRTFEVALKVWAEVFYYLAENNVLFEGILLKPSMVTPGAECKDKATPQQVSDYTLKLLKRRIPPAIPGIMFLSGGQSEVEATLNLNAMNQGPNPWHVSFSYARALQNTCLKTWAGRPENVKAAQEVLLVRAKANSLAQLGKYTGEGESEEAKKGMFVKGYVY	502	50561	18	2	---		0.841		0.512	*	---		0.085	*	0.483	*	0.141	*
199	286	gi|222836150|gb|EEE74571.1|	predicted protein [Populus trichocarpa] >gi|224135223|ref|XP_002327596.1| predicted protein [Populus trichocarpa]	MVLSKTSSESDDSVHSTFASRYVRASLPRFKMPENSIPKEAAFQIINDELMLDGNPRLNLASFVTTWMEPECDKLIMASINKNYVDMDEYPVTTELQNRCVNIIAHLFNAPLGDSETAIGVGTVGSSEAIMLAGLAFKRRWQNKMKAEGKPYDKPNIVTGANVQVCWEKFARYFEVELKEVKLRDGYYVMDPEKAVKMVDENTICVAAILGSTLNGEFEDVKLLNDLLVEKNKETGWDTPIHVDAASGGFIAPFIYPELEWDFRLPLVKSINVSGHKYGLVYAGIGWVVWRNKEDLPEELIFHINYLGADQPTFTLNFSKGSSQVIAQYYQLIRLGYEGYKNVMENCRDNMMVLKQGLENTGKFNIVSKDNGVPLVAFSLKDNSSHKEFEVSEMLRRFG…	500	68003	17	5
199	286	gi|222848891|gb|EEE86438.1|	predicted protein [Populus trichocarpa] >gi|224079722|ref|XP_002305927.1| predicted protein [Populus trichocarpa]	MVLSKTASESDVSVHSTFASRYVRASLPRFKMPENSIPKEAAFQIINDELMLDGNPRLNLASFVTTWMEPECDKLIMASINKNYVDMDEYPVTTELQNRCVNMIAHLFNAPLGDSETAVGVGTVGSSEAIMLAGLAFKRKWQNKRKAEGKPYDKPNIVTGANVQVCWEKFARYFEVELKEVKLSDGYYVMDPEKAVQMVDENTICVAAILGSTLNGEFEDVKLLNDLLVEKNKSTGWDTPIHVDAASGGFIAPFIYPELEWDFRLPLVKSINVSGHKYGLVYAGIGWVIWRNKEDLPEELIFHINYLGADQPTFTLNFSKGSSQVIAQYYQLIRLGYEGYRNVMENCRDNMLVLKQGLEKTGKFNIVSKDNGVPLVAFSLKDNSLHNEFEVSDMLRRFG…	500	68202	17	5
199	286	gi|75268007|gb|ABA18652.1|	glutamate decarboxylase [Populus tremula x Populus alba]	MVLSKTASESDVSVHSTFASRYVRASLPRFKMPENSIPKEAAFQIINDELMLDGNPRLNLASFVTTWMEPECDKLIIASINKNYVDMDEYPVTTELQNRCVNMIAHLFNAPLGDSETAVGVGTVGSSEAIMLAGLAFKRKWQNKRKAEGKPYDKPNIVTGANVQVCWEKFARYFEVELKEVKLSDGYYVMDPEKAVQMVDENTICVAAILGSTLNGEFEDVKLLNDLLVEKNKSTGWDTPIHVDAASGGFIAPFIYPELEWDFRLPLVKSINVSGHKYGLVYAGIGWVIWRNKEDLPEELIFHINYLGADQPTFTLNFSKGSSQVIAQYYQLIRLGYEGYKNVMENCRDNMLVLKQGLEKTGKFNIVSKDKGVPLVAFSLKDNSLHNEFEVSDMLRRFG…	500	68455	17	5	0.087	*	1.282		1.049		0.186		1.375		0.417		0.1	*
211	300	gi|194703312|gb|ACF85740.1|	unknown [Zea mays]	MFGYATDETPELMPLSHVLATKLGARLTEVRKDGTCAWLRPDGKTQVTVEYVNEGGAMVPVRVHTVLISTQHDETVTNDEIAADLKEHVIKPVIPERYLDEKTIFHLNPSGRFVIGGPHGDAGLTGRKIIIDTYGGWGAHGGGAFSGKDPTKVDRSGAYVARQAAKSIVASGLARRCLVQVSYAIGVPEPLSVFVDSYGTGTIPDKEILKIVKENFDFRPGMITINLDLKKGGNRFIKTAAYGHFGRDDADFTWEVVKPLKKASA	473	34958	13	1	---		---		---		---		---		---		---
213	302	gi|188037513|gb|ACD46367.1|	ribulose-1,5-bisphosphate carboxylase/oxygenase large subunit [Betula alleghaniensis] >gi|188037517|gb|ACD46369.1| ribulose-1,5-bisphosphate carboxylase/oxygenase large subunit [Betula papyrifera] >gi|188037519|gb|ACD46370.1| ribulose-1,5-bisphospha	SVGFKAGVKDYKLTYYTPDYETKDTDILAAFRVTPQPGVPPEEAGAAVAAESSTGTWTTVWTDGLTSLDRYKGRCYHIEPVAGEESQFIAYVAYPLDLFEEGSVTNMFTSIVGNVFGFKALRALRLEDLRIPPAYSKTFQGPPHGIQVERDKLNKYGRPLLGCTIKPKLGLSAKNYGRAVYECLRGGLDFTKDDENVNSQPF	467	26737	26	4	---		0.292	*	0.163	*	0.086	*	0.11	*	0.113	*	0.084	*
213	302	gi|188037529|gb|ACD46375.1|	ribulose-1,5-bisphosphate carboxylase/oxygenase large subunit [Cornus rugosa]	SVGFKAGVKEYKLTYYTPDYETKDTDILAAFRVTPQPGVPPEEAGAAVAAESSTGTWTTVWTDGLTSLDRYKGRCYHIEPVPGEESQFIAYVAYPLDLFEEGSVTNMFTSIVGNVFGFKALRALRLEDLRIPTAYVKTFQGPPHGIQVERDKLNKYGRPLLGCTIKPKLGLSAKNYGRAVYECLRGGLDFTKDDENVNSQPF	467	26793	26	4
213	302	gi|188037677|gb|ACD46449.1|	ribulose-1,5-bisphosphate carboxylase/oxygenase large subunit [Rubus allegheniensis] >gi|188037681|gb|ACD46451.1| ribulose-1,5-bisphosphate carboxylase/oxygenase large subunit [Rubus allegheniensis] >gi|188037689|gb|ACD46455.1| ribulose-1,5-bisphosp	SVGFKAGVKDYKLTYYTPDYETKDTDILAAFRVTPQPGVPPEEAGAAVAAESSTGTWTTVWTDGLTSLDRYKGRCYHIEPVAGEESQFIAYVAYPLDLFEEGSVTNMFTSIVGNVFGFKALRALRLEDLRIPPAYVKTFQGPPHGIQVERDKLNKYGRPLLGCTIKPKLGLSAKNYGRAVYECLRGGLDFTKDDENVNSQPF	467	26749	26	4
213	302	gi|188037695|gb|ACD46458.1|	ribulose-1,5-bisphosphate carboxylase/oxygenase large subunit [Rubus occidentalis]	SVGFKAGVKDYKLTYYTPDYETKDTDILAAFRVTPQPGVPPEEAGAAVAAESSTGTWTTVWTDGLTSLDRYKGRCYHIEPVAGEETQFIAYVAYPLDLFEEGSVTNMFTSIVGNVFGFKALRALRLEDLRIPPAYVKTFQGPPHGIQVERDKLNKYGRPLLGCTIKPKLGLSAKNYGRAVYECLRGGLDFTKDDENVNSQPF	467	26763	26	4
213	302	gi|188037787|gb|ACD46504.1|	ribulose-1,5-bisphosphate carboxylase/oxygenase large subunit [Symphyotrichum ciliolatum] >gi|188037821|gb|ACD46521.1| ribulose-1,5-bisphosphate carboxylase/oxygenase large subunit [Symphyotrichum urophyllum] >gi|188037799|gb|ACD46510.1| ribulose-1,	SVGFKAGVKDYKLTYYTPDYETKDTDILAAFRVTPQPGVPPEEAGAAVAAESSTGTWTTVWTDGLTSLDRYKGRCYGIEPVPGEESQFIAYVAYPLDLFEEGSVTNMFTSIVGNVFGFKALRALRLEDLRIPTAYVKTFQGPPHGIQVERDKLNKYGRPLLGCTIKPKLGLSAKNYGRAVYECLRGGLDFTKDDENVNSQPF	467	26699	26	4
213	302	gi|188037827|gb|ACD46524.1|	ribulose-1,5-bisphosphate carboxylase/oxygenase large subunit [Trifolium pratense]	QVGFKAGVKDYRLTYYTPDYETKDTDILAAFRVTPQPGVPPEEAGAAVAAESSTGTWTTVWTDGLTSLDRYKGRCYHIEPVAGEDTQFIAYVAYPLDLFEEGSVTNMFTSIVGNVFGFKALRALRLEDLRIPVAYVKTFQGPPHGIQVERDKLNKYGRPLLGCTIKPKLGLSAKNYGRAVYECLRGGLDFTKDDENVNSQPF	467	26516	26	4
213	302	gi|188037851|gb|ACD46536.1|	ribulose-1,5-bisphosphate carboxylase/oxygenase large subunit [Viburnum opulus]	SAGFKAGVKDYKLTYYTPDYETKDTDILAAFRVTPQPGVPPEEAGAAVAAESSTGTWTTVWTDGLTSLDRYKGRCYHIEPVAGEESQFIAYVAYPLDLFEEGSVTNMFTSIVGNVFGFKALRALRLEDLRIPVAYVKTFQGPPHGIQVERDKLNKYGRPLLGCTIKPKLGLSAKNYGRAVYECLRGGLDFTKDDENVNSQPF	467	26723	26	4
213	302	gi|300250416|gb|ADJ95714.1|	ribulose-1,5-bisphosphate carboxylase/oxygenase large subunit [Dendrobium chrysotoxum] >gi|300250474|gb|ADJ95743.1| ribulose-1,5-bisphosphate carboxylase/oxygenase large subunit [Dendrobium moschatum] >gi|300250460|gb|ADJ95736.1| ribulose-1,5-bispho	KAGVKDYKLTYYTPDYETKDTDILAAFRVTPQPGVPPEEAGAAVAAESSTGTWTTVWTDGLTSLDRYKGRCYHIEVVVGEENQYIAYVAYPLDLFEEGSVTNMFTSIVGNVFGFKALRALRLEDLRIPTSYSKTFQGPPHGIQVERDKLNKYGRPLLGCTIKPKLGLSAKNYGRAVYECLRGGLDFTKDDENVNSQPF	467	26440	26	4
213	302	gi|300250476|gb|ADJ95744.1|	ribulose-1,5-bisphosphate carboxylase/oxygenase large subunit [Dendrobium moschatum]	KLTYYTPDYETKDTDILAAFRVTPQPGVPPEEAGAAVAAESSTGTWTTVWTDGLTSLDRYKGRCYHIEVVVGEENQYIAYVAYPLDLFEEGSVTNMFTSIVGNVFGFKALRALRLEDLRIPTSYSKTFQGPPHGIQVERDKLNKYGRPLLGCTIKPKLGLSAKNYGRAVYECLRGGLDFTKDDENVNSQPF	467	25070	26	4
213	302	gi|300250478|gb|ADJ95745.1|	ribulose-1,5-bisphosphate carboxylase/oxygenase large subunit [Dendrobium moschatum]	VKDYKLTYYTPDYETKDTDILAAFRVTPQPGVPPEEAGAAVAAESSTGTWTTVWTDGLTSLDRYKGRCYHIEVVVGEENQYIAYVAYPLDLFEEGSVTNMFTSIVGNVFGFKALRALRLEDLRIPTSYSKTFQGPPHGIQVERDKLNKYGRPLLGCTIKPKLGLSAKNYGRAVYECLRGGLDFTKDDENVNSQPF	467	25880	26	4
216	306	gi|308742593|gb|ADO33444.1|	photosystem II CP43 chlorophyll apoprotein [Smilax china]	MTSVSQEIRAAEDPEFETFYTKNILLNEGIRAWMAAQDQPHENLIFPEEVLPRGNLFNGTLALAGRDQETTGFAWWAGNARLINLSGKLLGAHVAHAGLIVFWAGAMNLFEVAHFVPEKPMYEQGLILLPHLATLGWGVGPGGEVIDTFPYFVSGVLHLISSAVLGFGGIYHALLGPETLEESFPFFGYVWKDRNKMTTILGIHLILLGIGAFLLVLKALYFGGVYDTWAPGGGDVRKITNLTLSPSVIFGYLLKSPFGGEGWIVSVDDLEDIIGGHVWLGSICILGGIWHILTKPFAWARRAFVWSGEAYLSYSLGALAVFGFIACCFVWFNNTAYPSEFYGPTGPEASQAQAFTFLVRDQRLGANVGSAQGPTGLGKYLMRSPTGEVIFGGETMRFW…	456	60644	13	3	0.167		0.326	*	0.626		0.077		2.279		1.033		0.172
223	314	gi|224074105|ref|XP_002304255.1|	predicted protein [Populus trichocarpa] >gi|222841687|gb|EEE79234.1| predicted protein [Populus trichocarpa]	MPPVSLDNINPKVLKCEYAVRGEIVTLAQALQEELKSKPGSHPFDEILYCNIGNPQSLGQQPITFFREVLALCDHPSILDRSETQGLFSADAIERAWQILDQIPGRATGAYSHSQGIKGLRDTIAAGIEARDGFPADPNDIFLTDGASPAVHMMMQLLIRSEKDGILCPIPQYPLYSASIALHGGALVPYYLDEATGWGLEVSELKKQLADAKSKGITPRALVVINPGNPTGQVLAEDNQRGIVEFCKQEGLVLLADEVYQENVYVPEKKFDSFKKVARSMGYGEKDISLVSFQSVSKGYYGECGKRGGYMEVTGFGPEIREQIYKVASVNLCSNISGQILASLVMSPPKVGDESYESYSAEKDGILSSLARRAKTLEDAFNNLEAVTCNKAEGAMYLF…	447	62156	8	2	---		---		---		---		---		---		---
231	322	gi|223542730|gb|EEF44267.1|	dihydroxy-acid dehydratase, putative [Ricinus communis] >gi|255554188|ref|XP_002518134.1| dihydroxy-acid dehydratase, putative [Ricinus communis]	MQSTFISPRPATPFHCPITHHPHFSTRRSSSSLRVVAQSPPAVTTEPSPSQATTTVSQKLNKYSSRVTEPKSQGGSQAILHGVGLSDEDLSKPQIGISSVWYEGNTCNMHLLSLSEAVKQGVQDAGMVGFRFNTIGVSDAISMGTRGMCFSLQSRDLIADSIETVMSAQWYDGNISIPGCDKNMPGTIMAMGRLNRPSIMVYGGTIKPGHFNGHTYDIVSAFQVYGEYVSGSISDEDRRNVVRNSCPGAGACGGMYTANTMASAIEAMGMSLPYSSSIPAENQLKLDECRLAGKYLLELLRMDLKPRDIITRKSLRNAMVVVMALGGSTNAVLHLIAIARSVGLELTLDDFQKVSDEVPFLADLKPSGKYVMEDLHKIGGTPAVIRYLLEHGFMDGDCL…	438	75780	9	3	3.018	*	0.962		1.124		2.412	*	1.746		1.124		0.517	*
239	331	gi|224137704|ref|XP_002322623.1|	predicted protein [Populus trichocarpa] >gi|222867253|gb|EEF04384.1| predicted protein [Populus trichocarpa]	MEHRGGCGADNDSGDGSGLMTSIPWELFDKWAESEGIGSFDKSHTGVGMVFFPKDDNLVKEAKKAIVNIFEQEGLEVLGWRSVPVNTSVVGFYAKETMPNIQQVFVKVIKEENVDDIERELYICRKLIERAANSANWGNELYFCSLSNQTIVYKGMLRSEVLGMFYSDLQNDIYKSPFAIYHRRYSTNTSPRWPLAQPMRFLGHNGEINTIQGNLNWMQSRETSLKSSVWHGRENEIRPYGNPKASDSANLDSAAELLIRSGRAPEEALMILVPEAYKNHPTLTIKYPEVVDFYDYYKGQMEAWDGPALLLFSDGKTVGACLDRNGLRPARYWRTVDNFVYVASEVGVVPMDESKVTMKGRLGPGMMIAVDLPGGQVYENTEVKKRVALLNPYGKWVKE…	426	188790	17	2	---		18.527		---		1.054		---		---		---
255	349	gi|1229138|gb|AAB07749.1|	low temperature-responsive RNA-binding protein [Hordeum vulgare subsp. vulgare] >gi|75319742|sp|Q43472.1|GRP_HORVU RecName: Full=Glycine-rich RNA-binding protein blt801; AltName: Full=Low temperature-responsive RNA-binding protein	MADVEYRCFVGGLRWATDDQSLQNAFSKYGDVIDSKIITDRETGRSRGFGFVTFASDEAMRQAIEAMNGQDLDGRNITVNEAQSRRSDGGGGFGGGGGGYGGQRREGGGGGYGGGGGGYGGGRSGGGGGYGSRDGGGGGYGGGGGGYGGSRGGSGGGNWRE	399	16886	6	6
255	349	gi|469071|dbj|BAA03742.1|	RNA-binding glycine-rich protein-1b [Nicotiana sylvestris] >gi|295393565|gb|ADG03638.1| RNA-binding glycine-rich protein [Nicotiana tabacum]	MAEVEYSCFVGGLAWATTDRTLADAFGTYGEVLDSKIINDRETGRSRGFGFVTFKDEKCMRDAIEGMNGQELDGRSITVNEAQARGSGGGGGGYGGGRREGGGGGYGGGGGGYGGGRREGGGGGYGGGRREGGGGGYGGGGYGGGGRY	399	15977	6	6	0.61	*	0.195	*	0.031	*	0.093	*	0.213	*	0.093	*	0.206	*
265	363	gi|22655284|gb|AAM98232.1|	unknown protein [Arabidopsis thaliana] >gi|110740441|dbj|BAF02115.1| putative glyceraldehyde-3-phosphate dehydrogenase [Arabidopsis thaliana] >gi|25090331|gb|AAN72278.1| At1g42970/F13A11_3 [Arabidopsis thaliana] >gi|19310805|gb|AAL85133.1| putative	MATHAALAVSRIPVTQRLQSKSAIHSFPAQCSSKRLEVAEFSGLRMSSIGGEASFFDAVAAQIIPKAVTTSTPVRGETVAKLKVAINGFGRIGRNFLRCWHGRKDSPLEVVVLNDSGGVKNASHLLKYDSMLGTFKAEVKIVDNETISVDGKLIKVVSNRDPLKLPWAELGIDIVIEGTGVFVDGPGAGKHIQAGASKVIITAPAKGADIPTYVMGVNEQDYGHDVANIISNASCTTNCLAPFAKVLDEEFGIVKGTMTTTHSYTGDQRLLDASHRDLRRARAAALNIVPTSTGAAKAVSLVLPQLKGKLNGIALRVPTPNVSVVDLVINVEKKGLTAEDVNEAFRKAANGPMKGILDVCDAPLVSVDFRCSDVSTTIDSSLTMVMGDDMVKVVAWYDN…	386	57212	16	5
265	363	gi|297846726|ref|XP_002891244.1|	glyceraldehyde-3-phosphate dehydrogenase B subunit [Arabidopsis lyrata subsp. lyrata] >gi|297337086|gb|EFH67503.1| glyceraldehyde-3-phosphate dehydrogenase B subunit [Arabidopsis lyrata subsp. lyrata]	MATHAALAVSRIPVTQRLQSKSAIHSFPAQWSSKRLEVAEFSGLRMSSIGGEASFFDAVAAQIIPKAVTTSTPVRGETVAKLKVAINGFGRIGRNFLRCWHGRKDSPLEVVVLNDSGGVKNASHLLKYDSMLGTFKAEVKIVDNETISVDGKLIKVVSNRDPLKLPWAELGIDIVIEGTGVFVDGPGAGKHIQAGASKVIITAPAKGADIPTYVVGVNEQDYGHDVANIISNASCTTNCLAPFAKVLDEEFGIVKGTMTTTHSYTGDQRLLDASHRDLRRARAAALNIVPTSTGAAKAVSLVLPQLKGKLNGIALRVPTPNVSVVDLVINVEKKGLTAEDVNEAFRKAANGPMKGILDVCDAPLVSVDFRCSDVSTTIDSSLTMVMGDDMVKVVAWYDN…	386	57278	16	5
265	363	gi|336390|gb|AAD10210.1|	glyceraldehyde 3-phosphate dehydrogenase B subunit [Arabidopsis thaliana]	MSSIGGEASFFDAVAAQIIPKAVTTSTPVRGETVAKLKVAINGFGRIGRNFLRCWHGRKDSPLEVVVLNDSGGVKNASHLLKYDSMLGTFKAEVKIVDNETISVDGKLIKVVSNRDPLKLPWAELGIDIVIEGTGVFVDGPGAGKHIQAGASKVIITAPAKGADIPTYVMGVNEQDYGHDVANIISNASCTTNCLAPFAKVLDEEFGIVKGTMTTTHSYTGDQRLLDASHRDLRRARAAALNIVPTSTGAAKAVSLVLPQLKGKLNGIALRVPTPNVSVVDLVINVEKKGLTAEDVNEAFRKAANGPMKGILDVCDAPLVSVDFRCSDVSTTIDSSLTMVMGDDMVKVVAWYDNEWGYSQRVVDLAHLVASKWPGAEAVGSGDPLEDFCKTNPADEECK…	386	51686	16	5	---		0.907	*	0.125		0.024	*	0.381	*	0.188	*	0.062	*
266	364	gi|37959586|gb|AAP42906.1|	ribulose-1,5-bisphosphate carboxylase/oxygenase large subunit [Acorus tatarinowii]	XDYXLTYYTPDYETKDTDILAAFRVTPQPGVPPEEAGAAVAAESSTGTWTTVWTDGLTSLDRYKGRCYHIEPVVGEQNQYIAYVAYPLDLFEEGSVTNMFTSIVGNVFGFKALRALRLEDLRIPPAYSKTFQGPPHGIQVERDKLNKYGRPLLGCTIKPKLGLSAKNYGRAVYECLRGGLDFTKDDENVNSQPFMXWRDRFLFCAEALYKAQTETGEIKGHYLNATAATCEEMMRRAQFARELGVPIVMHDYLTGGFTANTSLAIYCRNNGXLLHIHRAMHAVIDRQKNHGMHFRVLAKALRMSGGDHIHAGTVVGKLEGEREMTLGFVDLLRDDYIEKDRSRGIFFTQDWVSMPGVLPVASGGIHVWHMPALTEIFGDDSVLQFGGGTLGHPWGNAPG…	386	52487	24	2	0.283	*	0.582	*	0.475	*	0.413	*	0.401		0.446		0.359
267	365	gi|224056853|ref|XP_002299056.1|	predicted protein [Populus trichocarpa] >gi|222846314|gb|EEE83861.1| predicted protein [Populus trichocarpa] >gi|118485792|gb|ABK94744.1| unknown [Populus trichocarpa]	MSAFVGKYADELIKTAKYIATPGKGILAADESTGTIGKRLSSINVENIESNRQALRELLFTSGKALPYLSGVILFEETLYQKASDGKPFVEVLQENNIIPGIKVDKGVVELAGTNGETTTQGFDSLGARCQQYYKAGARFAKWRAVLKIGPTEPSELSIQQNAQGLARYAIICQENGLVPIVEPEILTDGSHDIKKCAAVTETVLAAVYKALNDQHVLLEGTLLKPNMVTPGSDSPKVTPEVIAEYTVTALRRTVPPAVPGIVFLSGGQSEEEATLNLNAMNKLEVLKPWTLSFSFGRALQKSTLKTWAGKKENVEKAQEVFLVRCKGNSEATLGKYTGGGAGGLASESLFEKGYKY	384	47783	11	4	0.055	*	0.617	*	0.422	*	0.111	*	0.346	*	0.363	*	0.407	*
267	365	gi|224122120|ref|XP_002330546.1|	predicted protein [Populus trichocarpa] >gi|222872104|gb|EEF09235.1| predicted protein [Populus trichocarpa]	MSAFVGKYADELIKTAKYIATPGKGILAADESTGTIGKRLSSINVENIESNRQALRELLFKSGKALPYLSGVILFEETLYQKSSDGKPFVEVLQENNVIPGIKVDKGVVELAGTNGETTTQGFDSLGARCQQYYKAGARFAKWRAVLKIGPTEPSELSIQQNAQGLARYAIICQENGLVPIVEPEILTDGAHDIKKCAAATETVLAAVYKALNDHHVLLEGTLLKPNMVTPGSDSPKVTPEVIAEFTVTALRRTVPPAVPGIVFLSGGQSEEEATLNLNAMNKLEVLKPWTLSFSFGRALQKSTLKTWAGKKENVEKAQEVFLVRCKGNSDATLGKYAGGGTGGLASESLFEKGYKY	384	48052	11	4
268	366	gi|219797738|emb|CAW55669.1|	unnamed protein product [Zea mays] >gi|257670516|emb|CBD27672.1| unnamed protein product [Zea mays] >gi|257317764|emb|CBC40671.1| unnamed protein product [Zea mays] >gi|257665935|emb|CBD27563.1| unnamed protein product [Zea mays] >gi|257331717|emb|C	MAALGAKMERLSSIDAQLRMLVPGKVSEDDKLIEYDALLLDRFLDILQDLHGDDLKEMVQECYEVAAEYETKHDLQKLDELGKMITSLDPGDSIVIAKSFSHMLNLANLAEEVQIAYRRRIKLKKGDFADENSAITESDIEETLKRLVVDLKKSPAEVFDALKSQTVDLVLTAHPTQSVRRSLLQKHSRIRNCLVQLYSKDITPDDKQELDEALQREIQAAFRTDEIRRTQPTPQDEMRAGMSYFHETIWKGVPKFLRRVDTALKNIGINERVPYNAPLIQFSSWMGGDRDGNPRVTPEVTRDVCLLARMMASNLYCSQIEDLMFELSMWRCSDELRMRADVLHLSTKKDAKHYIEFWKKVPPNEPYRVILSDVRDKLYNTRERSRELLSSGHSDIPEE…	384	127020	17	4	3.305	*	0.618	*	1.009		1.533	*	0.14		0.469		0.099	*
268	366	gi|219801879|emb|CAW61160.1|	unnamed protein product [Zea mays] >gi|219797732|emb|CAW55666.1| unnamed protein product [Zea mays] >gi|257317976|emb|CBC40883.1| unnamed protein product [Zea mays] >gi|257336170|emb|CBC29940.1| unnamed protein product [Zea mays] >gi|257670510|emb|C	MAALGAKMERLSSIDAHLRMLVPGKVSEDDKLIEYDALLLDRFLDILQDLHGDDLKEMVQECYEVAAEYETKHDLQKLDELGKMITSLDPGDSIVIAKSFSHMLNLANLAEEVQIAYRRRIKLKKGDFADENSAITESDIEETLKRLVVDLKKSPAEVFDALKSQTVDLVLTAHPTQSVRRSLLQKHSRIRNCLVQLYSKDITPDDKQELDEALQREIQAAFRTDEIRRTQPTPQDEMRAGMSYFHETIWKGVPKFLRRVDTALKNIGINERVPYNAPLIQFSSWMGGDRDGNPRVTPEVTRDVCLLARMMASNLYCSQIEDLMFELSMWRCSDELRMRADVLHLSTKKDAKHYIEFWKKVPPNEPYRVILSDVRDKLYNTRERSRELLSSGHSDIPEE…	384	127013	17	4
275	373	gi|223529618|gb|EEF31566.1|	proteasome subunit alpha type, putative [Ricinus communis] >gi|255579983|ref|XP_002530826.1| proteasome subunit alpha type, putative [Ricinus communis]	MARYDRAITVFSPDGHLFQVEYALEAVRKGNAAVGVRGTDVVVLGVEKKSTAKLQDARTVRKIVSLDNHVALVCAGLKADARVLINRARVECQSHRLTVEDPVTVEYITRYIAGLQQKYTQSGGVRPFGLSTLIVGFDPYTGIPSLYQTDPSGAFSAWKANATGRNSNSMREFLEKNYKETSGQETVKLAIRALLEVVESGGKNIEIAVMTKDHGLRQLEESEIDAIVAEIEAEKAAAEAAKKAPPKEI	378	32720	12	12
277	376	gi|223546334|gb|EEF47836.1|	ribulose-5-phosphate-3-epimerase, putative [Ricinus communis] >gi|255547345|ref|XP_002514730.1| ribulose-5-phosphate-3-epimerase, putative [Ricinus communis]	MTTASLCSSTTQINGFGASLRLQKNHLFCQPGSVTLSRRKIHTVVKASARVDKFSKSDIIVSPSILSANFAKLGEQVKAVXXITIGPLVVDALRPVTDLPLDVHLMIVEPEQRVPDFIKAGADIVSVHCEQSSTIHLHRTVNQIKSLGAKAGVVLNPATPLSAIDYVLDVVDLVLIMSVNPGFGGQSFIESQVKKISDLRRLCAEKGVNPWIEVDGGVGPKNAYKVIEAGANALVAGSAVFGAKDYAEAIKGIKNSKRPVAVPA	377	34298	10	10
280	379	gi|59938793|gb|AAX12161.1|	actin [Panax ginseng]	DDMEKIWHHTFYXELRVAPEEHPVXLTEAPLNPKAXREKMTHXMXETFNTPAMYVAIQADLSLYASGRTTGIVLDSGDGVSHTVPIYEGYALPHAIL	376	12073	19	19	1.452	*	1.382	*	1.152	*	0.998		1.594	*	0.547	*	0.778	*
284	383	gi|257696350|emb|CBC70129.1|	unnamed protein product [Capsicum annuum] >gi|62910196|gb|AAY21068.1| cytosolic ascorbate peroxidase [Capsicum annuum] >gi|257352639|emb|CBB98585.1| unnamed protein product [Capsicum annuum] >gi|257643596|emb|CBC89276.1| unnamed protein product [Cap	MGKSYPTVSAEYLKAVDKCKRKLRALIAEKNCAPIMLRLAWHSAGTYDVCSKTGGPFGTMRFRAEQAHGANNGIDIAIRLLEPIREQFPTLSYADFHQLAGVVAVEVTGGPDVPFHPGREDKPEPPVEGRLPDATKGSDHLRDVFVKQMGLSDKDIVALSGGHTLGRCHKERSGFEGPWTTNPLIFDNSYFKELLSGEKEGLLQLPSDKALLSDPAFRPLVEKYAADEDAFFADYAEAHLKLSELGFAEA	367	33118	8	4	1.01		1.182		2.077	*	1.382	*	0.904		0.663	*	1.058
285	384	gi|100526|pir||S24992	photosystem II protein D1 - common sunflower chloroplast (fragment)	SFSDGMPLGISGTFNFMIVFQAEHNILMHPFHMLGVAGVFGGSLFSAMHGSLVTSSLIRETTENESANEGYRFGQEEETYNIVAAHGYFGRLIFQYASFNNSRSLHFFLAAWPVVGIWFTALGISTMAFNLNGFNFNQSVVDSQGRVINSWADIINPANLGMEVMHERNAHNFPLDLAAIEAPSTNG	367	20854	13	11
285	384	gi|112030956|gb|ABH88068.1|	photosystem II protein D1 [Phaseolus vulgaris]	MNQDFTMTAILERRESESLWGRFCNWITSTENRLYIGWFGVLMIPTLLTATSVFIIAFIAAPPVDIDGIREPVSGSLLYGNNIISGAIIPTSAAIGLHFYPIWEAASVDEWLYNGGPYELIVLHFLLGVACYMGREWELSFRLGMRPWIAVAYSAPVAAATAVFLIYPIGQGSFSDGMPLGISGTFNFMIVFQAEHNILMHPFHMLGVAGVFGGSLFSAMHGSLVTSSLIRETTENESANEGYRFGQEEETYNIVAAHGYFGRLIFQYASFNNSRSLHFFLAAWPVVGIWFTALGISTMAFNLNGFNFNQSVVDSQGRVINTWADIINRANLGMEVMHERNAHNFPLDLAAMEAPSVNG	367	40096	13	11
285	384	gi|114199075|gb|ABI54128.1|	photosystem II D1 protein [Amaranthus retroflexus] >gi|131237|sp|P02956.1|PSBA_AMAHY RecName: Full=Photosystem Q(B) protein; AltName: Full=32 kDa thylakoid membrane protein; AltName: Full=Photosystem II protein D1; Flags: Precursor	MTAILERRESESLWGRFCNWITSTENRLYIGWFGVLMIPTLLTATSVFIIAFIAAPPVDIDGIREPVSGSLLYGNNIISGAIIPTSAAIGLHFYPIWEAASVDEWLYNGGPYELIVLHFLLGVACYMGREWELSFRLGMRPWIAVAYSAPVAAATAVFLIYPIGQGSFSDGMPLGISGTFNFMIVFQAEHNILMHPFHMLGVAGVFGGSLFSAMHGSLVTSSLIRETTENESANEGYRFGQEEETYNIVAAHGYFGRLIFQYASFNNSRSLHFFLAAWPVIGIWFTALGISTMAFNLNGFNFNQSVVDSQGRVINTWADIINRANLGMEVMHERNAHNFPLDLAAIEAPSTNG	367	39358	13	11
285	384	gi|118390592|gb|ABK81162.1|	photosystem II D1 protein [Schiedea laui] >gi|118390616|gb|ABK81174.1| photosystem II D1 protein [Schiedea spergulina] >gi|118390620|gb|ABK81176.1| photosystem II D1 protein [Schiedea trinervis] >gi|118390624|gb|ABK81178.1| photosystem II D1 protein	FGVLMIPTLLTATSVFIIAFIAAPPVDIDGIREPVSGSLLYGNNIISGAIIPTSAAIGLHFYPIWEAASVDEWLYNGGPYELIVLHFLLGVACYMGREWELSFRLGMRPWIAVAYSAPVAAATAVFLIYPIGQGSFSDGMPLGISGTFNFMIVFQAEHNILMHPFHMLGVAGVFGGSLFSAMHGSLVTSSLIRETTENESANEGYRFGQEEETYNIVAAHGYFGRLIFQYASFNNSRSLHF	367	26635	13	11
285	384	gi|122202895|sp|Q2QDA8.1|PSBA_CUCSA	RecName: Full=Photosystem Q(B) protein; AltName: Full=32 kDa thylakoid membrane protein; AltName: Full=Photosystem II protein D1; Flags: Precursor >gi|309322193|ref|YP_003934108.1| photosystem II protein D1 [Geranium palmatum] >gi|300069286|gb|ADJ66	MTAILERRESESLWGRFCNWITSTENRLYIGWFGVLMIPTLLTATSVFIIAFIAAPPVDIDGIREPVSGSLLYGNNIISGAIIPTSAAIGLHFYPIWEAASVDEWLYNGGPYELIVLHFLLGVACYMGREWELSFRLGMRPWIAVAYSAPVAAATAVFLIYPIGQGSFSDGMPLGISGTFNFMIVFQAEHNILMHPFHMLGVAGVFGGSLFSAMHGSLVTSSLIRETTENESANEGYRFGQEEETYNIVAAHGYFGRLIFQYASFNNSRSLHFFLAAWPVVGIWFTALGISTMAFNLNGFNFNQSVVDSQGRVINTWADIINRANLGMEVMHERNAHNFPLDLAAVEVPSING	367	39370	13	11
285	384	gi|122233824|sp|Q0G9N9.1|PSBA_LIRTU	RecName: Full=Photosystem Q(B) protein; AltName: Full=32 kDa thylakoid membrane protein; AltName: Full=Photosystem II protein D1; Flags: Precursor >gi|4097505|gb|AAD00106.1| D1 protein [Magnolia pyramidata] >gi|122164461|sp|Q06H17.1|PSBA_DRIGR RecNa	MTAILERRESTSLWGRFCNWITSTENRLYIGWFGVLMIPTLLTATSVFIIAFIAAPPVDIDGIREPVSGSLLYGNNIISGAIIPTSAAIGLHFYPIWEAASVDEWLYNGGPYELIVLHFLLGVACYMGREWELSFRLGMRPWIAVAYSAPVAAATAVFLIYPIGQGSFSDGMPLGISGTFNFMIVFQAEHNILMHPFHMLGVAGVFGGSLFSAMHGSLVTSSLIRETTENESANEGYRFGQEEETYNIVAAHGYFGRLIFQYASFNNSRSLHFFLAAWPVVGIWFTALGISTMAFNLNGFNFNQSVVDSQGRVINTWADIINRANLGMEVMHERNAHNFPLDLAAVEAPSTNG	367	39302	13	11
285	384	gi|122893970|ref|YP_001004166.1|	photosystem II protein D1 [Ranunculus macranthus] >gi|69217628|gb|AAZ04090.1| photosystem II protein D1 [Ranunculus macranthus] >gi|85540784|gb|ABC70736.1| photosystem II protein D1 [Ranunculus macranthus]	MTAILERRESESLWGRFCNWVTSTENRLYIGWFGVLMIPTLLTATSVFIIAFIAAPPVDIDGIREPVSGSLLYGNNIISGAIIPTSAAIGLHFYPIWEAASVDEWLYNGGPYELIVLHFLLGVACYMGREWELSFRLGMRPWIAVAYSAPVAAATAVFLIYPIGQGSFSDGMPLGISGTFNFMIVFQAEHNILMHPFHMLGVAGVFGGSLFSAMHGSLVTSSLIRETTENESANEGYRFGQEEETYNIVAAHGYFGRLIFQYASFNNSRSLHFFLAAWPVVGIWFTALGISTMAFNLNGFNFNQSVVDSQGRVINTWADIINRANLGMEVMHERNAHNFPLDLAAVEVPSING	367	39356	13	11
285	384	gi|124360828|gb|ABN08800.1|	Photosystem II reaction centre protein PsbA/D1 [Medicago truncatula]	MTAILERRDSENLWSRFCNWITSTENRLYIGWFGVLMIPTLLTATSVFIIAFIAAPPVDIDGIREPVSGSLLYGNNIISGAIIPTSATIGLHFYPIWEAASVDEWLYNGGPYELIVLHFLLGVACYMGREWELSFRLGMRPWIAVAYSAPVAAATAVFLIYPIGQGSFSDGMPLGISGTFNFMIVFQAEHNILMHPFHMLGVAGVFGGSLFSAMHGSLVTSSLIRETTENESANEGYRFGQEEETYNIVAAHGYFGRLIFQYASFNNSRSLHFFLAAWPVVGIWFTALGISTMAFNLNGFNFNQSVVDSQGRVINTWADIINRANLGMEVMHERNAHNFPLDLAAVEAPSING	367	39415	13	11
285	384	gi|131250|sp|P04998.1|PSBA_MEDSA	RecName: Full=Photosystem Q(B) protein; AltName: Full=32 kDa thylakoid membrane protein; AltName: Full=Photosystem II protein D1; Flags: Precursor >gi|11736|emb|CAA28646.1| unnamed protein product [Medicago sativa]	MTAILERRDSETLWGRFCNWITSTENRLYIGWFGVLMIPTLLTATSVFIIAFIAAPPVDIDGIREPVSGSLLYGNNIICGAIIPTSAAIGLHFYPIWEAASVDEWLYNGGPYELIVLHFLLGVACYMGREWELSFRLGMRPWIAVAYSAPVAAATAVFLIYPIGQGSFSDGMPLGISGTFNFMIVFQAEHNILMHPFHMLGVAGVFGGSLFSAMHGSLVTSSLIRETTENESANEGYRFGQEEETYNIVAAHGYFGRLIFQYASFNNSRSLHFFLAAWPVVGIWFTALGISTMAFNLNGFNFNQSVVDSQGRVINTWADIINRANLGMEVMHERNAHNFPLDLAAVEAPSING	367	39415	13	11
285	384	gi|131252|sp|P06585.3|PSBA_PEA	RecName: Full=Photosystem Q(B) protein; AltName: Full=32 kDa thylakoid membrane protein; AltName: Full=Photosystem II protein D1; Flags: Precursor >gi|197089782|gb|ACH41052.1| photosystem II protein D1 [Cicer arietinum] >gi|293338548|gb|ADE43521.1|	MTAILERRDSENLWGRFCNWITSTENRLYIGWFGVLMIPTLLTATSVFIIAFIAAPPVDIDGIREPVSGSLLYGNNIISGAIIPTSAAIGLHFYPIWEAASVDEWLYNGGPYELIVLHFLLGVACYMGREWELSFRLGMRPWIAVAYSAPVAAATAVFLIYPIGQGSFSDGMPLGISGTFNFMIVFQAEHNILMHPFHMLGVAGVFGGSLFSAMHGSLVTSSLIRETTENESANEGYRFGQEEETYNIVAAHGYFGRLIFQYASFNNSRSLHFFLAAWPVVGIWFTALGISTMAFNLNGFNFNQSVVDSQGRVINTWADIINRANLGMEVMHERNAHNFPLDLAAVEAPSING	367	39355	13	11
285	384	gi|131253|sp|P04999.3|PSBA_PETHY	RecName: Full=Photosystem Q(B) protein; AltName: Full=32 kDa thylakoid membrane protein; AltName: Full=Photosystem II protein D1; Flags: Precursor >gi|12104|emb|CAA28647.1| unnamed protein product [Petunia x hybrida] >gi|82258|pir||A25579 photosyste	MTAILERRESESLWGRFCNWITSSENRLYIGWFGVLMIPTLLTATSVFIIAFIAAPPVDIDGIREPVSGSLLYGNNIISGAIIPTSAAIGLHFYPIWEAASVDEWLYNGGPYELIVLHFLLGVACYMGREWELSFRLGMRPWIAVAYSAPVAAATAVFLIYPIGQGSFSDGMPLGISGTFNFMIVFQAEHNILMHPFHMLGVAGVFGGSLFSAMHGSLVTSSLIRETTENESANEGYRFGQEEETYNIVAAHGYFGRLIFQYASFNNSRSLHFFLAAWPVVGIWFTALGISTMAFNLNGFNFNQSVVDSQGRVINTWADIINRANLGMEVMHERNAHNFPLDLAAIEAPSTNG	367	39330	13	11
285	384	gi|131258|sp|P02957.3|PSBA_SOYBN	RecName: Full=Photosystem Q(B) protein; AltName: Full=32 kDa thylakoid membrane protein; AltName: Full=Photosystem II protein D1; Flags: Precursor >gi|83595724|gb|ABC25105.1| photosystem II protein D1 [Glycine max] >gi|91214123|ref|YP_538745.1| phot	MTAILERRESESLWGRFCNWITSTENRLYIGWFGVLMIPTLLTATSVFIIAFIAAPPVDIDGIREPVSGSLLYGNNIISGAIIPTSAAIGLHFYPIWEAASVDEWLYNGGPYELIVLHFLLGVACYMGREWELSFRLGMRPWIAVAYSAPVAAATAVFLIYPIGQGSFSDGMPLGISGTFNFMIVFQAEHNILMHPFHMLGVAGVFGGSLFSAMHGSLVTSSLIRETTENESANEGYRFGQEEETYNIVAAHGYFGRLIFQYASFNNSRSLHFFLAAWPVVGIWFTALGISTMAFNLNGFNFNQSVVDSQGRVINTWADIINRANLGMEVMHERNAHNFPLDLAAIDAPSING	367	39342	13	11
285	384	gi|131259|sp|P27201.3|PSBA_SPIOG	RecName: Full=Photosystem Q(B) protein; AltName: Full=32 kDa thylakoid membrane protein; AltName: Full=Photosystem II protein D1; Flags: Precursor >gi|12276|emb|CAA42156.1| D1 protein [Landoltia punctata]	MTAILERRESTSLWGRFCNWVTSTENRLYIGWFGVLMIPTLLTATSVFIIAFIAAPPVDIDGIREPVSGSLLYGNNIISGAIIPTSAAIGLHFYPIWEAASVDEWLYNGGPYELIVLHFLLGVRCYMGREWELSFRLGMRPWIAVAYSAPVAAATAVFLIYPIGQGSFSDGMPLGISGTFNFMIVFQAEHNILMHPFHMLGVAGVFGGSLFSAMHGSLVTSSLIRETTENESANEGYRFGQEEETYNIVAAHGYFGRLIFQYASFNNSRSLHFFLAAWPVIGIWFTSLGISTMAFNLNGFNFNQSVVDSQGRVINTWADIINRANLGMEVMHERNAHNFPLDLAAVEAPSTIG	367	39402	13	11
285	384	gi|13358959|dbj|BAB33176.1|	PSII 32 KDa protein [Lotus japonicus] >gi|13518418|ref|NP_084778.1| photosystem II protein D1 [Lotus japonicus] >gi|23821997|sp|Q9BBU3.1|PSBA_LOTJA RecName: Full=Photosystem Q(B) protein; AltName: Full=32 kDa thylakoid membrane protein; AltName: Ful	MTAILERRESENLWGRFCNWITSTENRLYIGWFGVLMIPTLLTATSVFIIAFIAAPPVDIDGIREPVSGSLLYGNNIISGAIIPTSAAIGLHFYPIWEAASVDEWLYNGGPYELIVLHFLLGVACYMGREWELSFRLGMRPWIAVAYSAPVAAATAVFLIYPIGQGSFSDGMPLGISGTFNFMIVFQAEHNILMHPFHMLGVAGVFGGSLFSAMHGSLVTSSLIRETTENESANEGYRFGQEEETYNIVAAHGYFGRLIFQYASFNNSRSLHFFLAAWPVVGIWFTALGISTMAFNLNGFNFNQSVVDSQGRVINTWADIINRANLGMEVMHERNAHNFPLDLAAVEAPSING	367	39369	13	11
285	384	gi|134286207|dbj|BAF49835.1|	PSII 32 KDa protein [Aethionema grandiflorum] >gi|190360045|sp|A4QJI0.1|PSBA_AETGR RecName: Full=Photosystem Q(B) protein; AltName: Full=32 kDa thylakoid membrane protein; AltName: Full=Photosystem II protein D1; Flags: Precursor >gi|139389245|ref|Y	MTAILERRESESLWGRFCNWITSTENRLYIGWFGVLMIPTLLTATSVFIIAFIAAPPVDIDGIREPVSGSLLYGNNIISGAIIPTSAAIGLHFYPIWEAASVDEWLYNGGPYELIVLHFLLGVACYMGREWELSFRLGMRPWIAVAYSAPVAAATAVFLIYPIGQGSFSDGMPLGISGTFNFMIVFQAEHNILMHPFHMLGVAGVFGGSLFSAMHGSLVTSSLIRETTENESANEGYRFGQEEETYNIVAAHGYFGRLIFQYASFNNSRSLHFFLAAWPVVGIWFTALGISTMAFNLNGFNFNQSVVDSQGRVINTWADIINRANLGMEVMHERNAHNFPLDLAVVEAPSTNG	367	39358	13	11
285	384	gi|134286465|dbj|BAF50090.1|	PSII 32 KDa protein [Barbarea verna] >gi|139388074|ref|YP_001123266.1| PSII 32 KDa protein [Barbarea verna] >gi|190360050|sp|A4QK85.1|PSBA_BARVE RecName: Full=Photosystem Q(B) protein; AltName: Full=32 kDa thylakoid membrane protein; AltName: Full=P	MTAILERRESESLWGRFCNWITSTENRLYIGWFGVLMIPTLLTATSVFIIAFIAAPPVDIDGIREPVSGSLLYGNNIISGAIIPTSAAIGLHFYPIWEAASVDEWLYNGGPYELIVLHFLLGVACYMGREWELSFRLGMRPWIAVAYSAPVAAATAVFLIYPIGQGSFSDGMPLGISGTFNFMIVFQAEHNILMHPFHMLGVAGVFGGSLFSAMHGSLVTSSLIRETTENESANEGYRFGQEEETYNIVAAHGYFGRLIFQYASFNNSRSLHFFLTAWPVVGIWFTALGISTMAFNLNGFNFNQSVVDSQGRVINTWADIINRANLGMEVMHERNAHNFPLDLAAVEAPSTNG	367	39360	13	11
285	384	gi|134286820|dbj|BAF50441.1|	PSII 32 KDa protein [Lepidium virginicum] >gi|139388890|ref|YP_001123617.1| photosystem II protein D1 [Lepidium virginicum] >gi|190360066|sp|A4QL86.1|PSBA_LEPVR RecName: Full=Photosystem Q(B) protein; AltName: Full=32 kDa thylakoid membrane protein;	MTAILERRETESLWGRFCNWITSTENRLYIGWFGVLMIPTLLTATSVFIIAFIAAPPVDIDGIREPVSGSLLYGNNIISGAIIPTSAAIGLHFYPIWEAASVDEWLYNGGPYELIVLHFLLGVACYMGREWELSFRLGMRPWIAVAYSAPVAAATAVFLIYPIGQGSFSDGMPLGISGTFNFMIVFQAEHNILMHPFHMLGVAGVFGGSLFSAMHGSLVTSSLIRETTENESANEGYRFGQEEETYNIVAAHGYFGRLIFQYASFNNSRSLHFFLAAWPVVGIWFTALGISTMAFNLNGFNFNQSVVDSQGRVINTWADIINRANLGMEVMHERNAHNFPLDLAAVEAPSTNG	367	39344	13	11
285	384	gi|134286910|dbj|BAF50530.1|	PSII 32 KDa protein [Lobularia maritima] >gi|190360067|sp|A4QLH5.1|PSBA_LOBMA RecName: Full=Photosystem Q(B) protein; AltName: Full=32 kDa thylakoid membrane protein; AltName: Full=Photosystem II protein D1; Flags: Precursor >gi|139390133|ref|YP_001	MTAILERRESENLWGRFCNWITSTENRLYIGWFGVLMIPTLLTATSVFIIAFIAAPPVDIDGIREPVSGSLLYGNNIISGAIIPTSAAIGLHFYPIWEAASVDEWLYNGGPYELIVLHFLLGVACYMGREWELSFRLGMRPWIAVAYSAPVAAATAVFLIYPIGQGSFSDGMPLGISGTFNFMIVFQAEHNILMHPFHMLGVAGVFGGSLFSAMHGSLVTSSLIRETTENESANEGYRFGQEEETYNIVAAHGYFGRLIFQYASFNNSRSLHFFLTAWPVVGIWFTALGISTMAFNLNGFNFNQSVVDSQGRVINTWADIINRANLGMEVMHERNAHNFPLDLAAVEAPSTNG	367	39387	13	11
285	384	gi|139389076|ref|YP_001123794.1|	photosystem II protein D1 [Nasturtium officinale] >gi|139387232|ref|YP_001123353.1| photosystem II protein D1 [Capsella bursa-pastoris] >gi|122164300|sp|Q06FY1.1|PSBA_PELHO RecName: Full=Photosystem Q(B) protein; AltName: Full=32 kDa thylakoid membr	MTAILERRESESLWGRFCNWITSTENRLYIGWFGVLMIPTLLTATSVFIIAFIAAPPVDIDGIREPVSGSLLYGNNIISGAIIPTSAAIGLHFYPIWEAASVDEWLYNGGPYELIVLHFLLGVACYMGREWELSFRLGMRPWIAVAYSAPVAAATAVFLIYPIGQGSFSDGMPLGISGTFNFMIVFQAEHNILMHPFHMLGVAGVFGGSLFSAMHGSLVTSSLIRETTENESANEGYRFGQEEETYNIVAAHGYFGRLIFQYASFNNSRSLHFFLAAWPVVGIWFTALGISTMAFNLNGFNFNQSVVDSQGRVINTWADIINRANLGMEVMHERNAHNFPLDLAAVEAPSTNG	367	39330	13	11
285	384	gi|14139|emb|CAA25252.1|	unnamed protein product [Nicotiana tabacum]	MTAILERRESESLWGRFCNWITSTENRLYIGWFGVLMIPTLLTATSVFIIAFIAAPPVDIDGIREPVSGSLLYGNNIISGAIIPTSAAIGLHFYPIWEAASVDEWLYNGGPYELIVLDFLLGVACYMGREWELSFRLGMRPWIAVAYSAPVAAATAVFLIYPIGQGSFSDGMPLGISGTFNFMIVFQAEHNILMHPFHMLGVAGVFGGSLFSAMHGSLVTSSLIRETTENESANEGYRFGQEEETYNIVAAHGYFGRLIFQYASFNNSRSLHFFLAAWPVVGIWFTALGISTMAFNLNGFNFNQSVVDSQGRVINTWADIINRANLGMEVMHERNAHNFPLDLAAIEAPSTNG	367	39322	13	11	---		0.427	*	0.395	*	0.105	*	4.049	*	1.094	*	0.385
285	384	gi|148728457|gb|ABR08703.1|	photosystem II D1 protein [Raphanus raphanistrum]	RETTENESANEGYRFGQEEETYNIVAAHGYFGRLIFQYASFNNSRSLHFFLAAWPVVGIWFTALGISTMAFNLNGFNFNQSVVDSQGRVINTWADIINRAN	367	11790	13	11
285	384	gi|149390520|ref|YP_001294164.1|	photosystem II protein D1 [Buxus microphylla] >gi|146762265|gb|ABQ45229.1| photosystem II protein D1 [Buxus microphylla] >gi|190360051|sp|A6MM16.1|PSBA_BUXMI RecName: Full=Photosystem Q(B) protein; AltName: Full=32 kDa thylakoid membrane protein; Al	MTAILERRESESLWGRFCNWITSTENRLYIGWFGVLMIPTLLTATSVFIIAFIAAPPVDIDGIREPVSGSLLYGNNIISGAIIPTSAAIGLHFYPIWEAASVDEWLYNGGPYELIVLHFLLGVACYMGREWELSFRLGMRPWIAVAYSAPVAAATAVFLIYPIGQGSFSDGMPLGISGTFNFMIVFQAEHNILMHPFHMLGVAGVFGGSLFSAMHGSLVTSSLIRETTENESANEGYRFGQEEETYNIVAAHGYFGRLIFQYASFNNSRSLHFFLAAWPVIGIWFTALGISTMAFNLNGFNFNQSVVDSQGRVINTWADIINRANLGMEVMHERNAHNFPLDLAAVEAPSTNG	367	39344	13	11
285	384	gi|153012231|ref|YP_001381746.1|	photosystem II protein D1 [Medicago truncatula]	MTAILERRDSENLWSRFCNWITSTENRLYIGWFGVLMIPTLLTATSVFIIAFIAAPPVDIDGIREPVSGSLLYGNNIISGAIIPTSAAIGLHFYPIWEAASVDEWLYNGGPYELIVLHFLLGVACYMGREWELSFRLGMRPWIAVAYSAPVAAATAVFLIYPIGQGSFSDGMPLGISGTFNFMIVFQAEHNILMHPFHMLGVAGVFGGSLFSAMHGSLVTSSLIRETTENESANEGYRFGQEEETYNIVAAHGYFGRLIFQYASFNNSRSLHFFLAAWPVVGIWFTALGISTMAFNLNGFNFNQSVVDSQGRVINTWADIINRANLGMEVMHERNAHNFPLDLAAVEAPSING	367	39385	13	11
285	384	gi|15529719|gb|AAL01424.1|AF410185_1	PSII D1 protein [Prunus serrulata var. tomentella]	MTAILERRESESLWGRFCNWITSTENRLYIGWFGVLMIPTLLTATSVFFRAFIAAPPVDIDGIREPVSGSLLYGNNIGSRAIIPTSAAIGLHFYPIWEAASVDEWLYNGGPYELIVLNFLLGVACYMGRELELSFRLGMRPWIAVAYSAPVAAATAVFLIYPIGQGSFSDGMPLGISGTFNFMIVFQAEHNILMHPFHMLGVAGVFGGSLFSAMHGSLVTSSLIRETTENESANEGYRFGQEEETYNIVAAHGYFGRLIFQYASFNNSRSLHFFLAAWPVVGIWFTALGISTMAFNLNGFNFNQSVVDSQGRVINTWADIINRANLGMEVMHERNAHNFPLDLAAVEAPSTNG	367	39354	13	11
285	384	gi|15529727|gb|AAL01428.1|AF410189_1	PSII D1 protein [Prunus persica]	MTAILERRESESLWGRFCNWITSTENRLYIGWFGVLMIPTLLTATSVFIMAFIAAPPVDIDGIREPVSGSLLYGNNMSSRAIIPTFAAIGLHFYPIWEAASVDEWLYNGGPYELIVLQFLLGVAWYMGRELELSFRLGMRPWIAVAYSAPVAAATAVFLIYPIGQASFSDGMPLGISGTINFMIVFQTDHNILMHPFHMLGVAGVFGGSLFSAMHGSLVTSSLIRETTENESANEGYRFGQEEETYNIVAAHGYFGRLIFQYASFNNSRSLHFFLAAWPVVGIWFTALGISTMAFNLNGFNFNHPVVHTHSSVINTWADKVNRANLGMEVMHERNAHNFPLDLAAVEAPSTNG	367	39769	13	11
285	384	gi|15529729|gb|AAL01429.1|AF410190_1	PSII D1 protein [Prunus persica]	MTAILERRESESLWGRFCNWITSTENRLYIGWFGVLMIPTLLTATSVFIMAFIAAPPVDIDGIREPVSGSLLYGNNMSSRAIIPTFAAIGLHFYPIWEAASVDEWLYNGGPYELIVLQFLLGVAWYMGRELELSFRLGMRPWIAVAYSAPVAAATAVFLIYPIGQGSFSDGMPLGISGTFNFMIVFQAEHNILMHPFHMLGVAGVFGGSLFSAMHGSLVTSSLIRETTENESANEGYRFGQEEETYNIVAAHGYFGRLIFQYASFNNSRSLHFFLAAWPVVGIRFTALGISTMAFNLNGFNFNHPVVHTHSSVINTWADKVNRANLGMEVMHERNAHNFPLDLAAVEAPSTNG	367	39743	13	11
285	384	gi|15529733|gb|AAL01431.1|AF410192_1	PSII D1 protein [Prunus tomentosa]	MTAILERRESESLWGRFCNWITSTENRLYIGWFGVLMIPTLLTATSVFIMAFIAAPPVDIDGIREPVSGSLLYGNNMSSRAIIPTFAAIGLHFYPIWEAASVDEWLYNGGPYELIVLQFLLGVAWYMGRELELSFRLGMRPWIAVTYSAPVAASTTVFLIYPIGQEKFSHGMPLGISGTFNFMIVFQAEHNILMHPFHMLGVAGVFGGSLFSAMHGSLVTSSLIRETTENESANEGYRFGQEEETYNIVAAHGYFGRLIFQYASFNNSRSLHFFLAAWPVVGIWFTALGISTMAFNLNGFNFNHPVVHTHSSVINTWADKVNRANLGMEVMHERNAHNFPLDLAAVEAPSTNG	367	40288	13	11
285	384	gi|15529735|gb|AAL01432.1|AF410193_1	PSII D1 protein [Prunus choreiana]	MTAILERRESESLWGRFCNWITSTENRLYIGWFGVLMIPTLLTATSVFIMAFIAAPPVDIDGIREPVSGSLLYGNNMSSRAIIPTFAAIGLHFYPIWEAASVDEWLYNGGPYELIVLQFLLGVAWYMGRELELSFRLGMRPWIAVAYSAPVAAATAVFLIYPIGQGSFSDGMPLGISGTFNFMIVFQAEHNILMHPFHMLGVAGVFGGSLFSAMHGSLVTSSLIRETTENESANEGYRFGQEEETYNIVAAHGYFGRLIFQYASFNNSRSLHFFLAAWPVVGIWFTALGISTMAFNLNGFNFNHPVVHTHSSVINTWADKVNRANLGMEVMHERNAHNFPLDLAAVEAPSTNG	367	39773	13	11
285	384	gi|156598745|gb|ABU85627.1|	photosystem II protein D1 [Scaevola aemula]	MTAILERRESESLWGRFCNWITSTENRLYIGWFGVLMIPTLLTATSVFIIAFIAAPPVDIDGIREPVSGSLLYGNNIISGAIIPTSAAIGLHFYPIWEAASVDEWLYNGGPYELIVLHFLLGVACYMGREWELSFRLGMRPWIAVAYSAPVAAATAVFLIYPIGQGSFSDGMPLGISGTFNFMIVFQAEHNILMHPFHMLGVAGVFGGSLFSAMHGSLVTSSLIRETTENESANEGYRFGQEEETYNIVAAHGYFGRLIFQYASFNNSRSLHFFLAAWPVVGIWFTALGISTMAFNLNGFNFNQSVVDSQGRVINTWADIINRANLGMEVMHERNAHNFPLDLAAIEAPSTKG	367	39662	13	11
285	384	gi|156598897|gb|ABU85701.1|	photosystem II protein D1 [Trachelium caeruleum] >gi|157267470|gb|ABV26463.1| photosystem II protein D1 [Trachelium caeruleum] >gi|170784722|ref|YP_001718638.1| photosystem II protein D1 [Trachelium caeruleum]	MTAILERRESESLWGRFCNWITSTENRLYIGWFGVLMIPTLLTATSVFIIAFIAAPPVDIDGIREPVSGSLLYGNNIISGAIIPTSAAIGLHFYPIWEAASVDEWLYNGGPYELIVLHFLLGVACYMGREWELSFRLGMRPWIAVAYSAPVAAATAVFLIYPIGQGSFSDGMPLGISGTFNFMIVFQAEHNILMHPFHMLGVAGVFGGSLFSAMHGSLVTSSLIRETTENESANEGYRFGQEEETYNIVAAHGYFGRLIFQYASFNNSRSLHFFLAAWPVVGIWFTALGISTMAFNLNGFNFNQSVVDSQGRVINTWADIINRANLGMEVMHERNAHNFPLDLAAIESPSKNG	367	39691	13	11
285	384	gi|156618807|ref|YP_001430089.1|	photosystem II protein D1 [Cuscuta reflexa] >gi|12520|emb|CAA47847.1| D1-protein [Cuscuta reflexa] >gi|1096967|prf||2113216A psbA gene >gi|156555992|emb|CAM98375.1| PSII protein D1 [Cuscuta reflexa] >gi|400881|sp|P32036.1|PSBA_CUSRE RecName: Full=Ph	MTAILERRESESLWGRFCNWITSTENRLYIGWFGVLMIPTLLTATSVFIIAFIAAPPVDIDGIREPVSGSLLYGNNIVSGAIIPTSAAIGLHFYPIWEAASVDEWLYNGGPYELIVLHFLLGVACYMGREWELSFRLGMRPWIAVAYSAPVAAATAVFLIYPIGQGSFSDGMPLGISGTFNFMIVFQAEHNILMHPFHMLGVAGVFGGSLFSAMHGSLVTSSLIRETTENESANEGYRFGQEEETYNIVAAHGYFGRLIFQYASFNNSRSLHFFLAAWPVVGIWFTALGISTMAFNLNGFNFNQSVVDSQGRVINTWADIINRANLGMEVMHERNAHNFPLDLAAIEAPATNG	367	39314	13	11
285	384	gi|157056738|gb|ABV02328.1|	photosystem II protein D1 [Ipomoea purpurea] >gi|190360064|sp|A7Y395.1|PSBA_IPOPU RecName: Full=Photosystem Q(B) protein; AltName: Full=32 kDa thylakoid membrane protein; AltName: Full=Photosystem II protein D1; Flags: Precursor >gi|157325510|ref|YP	MTAILERRESQSLWGRFCNWITSTENRLYIGWFGVLMIPTLLTATSVFIIAFIAAPPVDIDGIREPVSGSLLYGNNIISGAIIPTSAAIGLHFYPIWEAASVDEWLYNGGPYELIVLHFLLGVACYMGREWELSFRLGMRPWIAVAYSAPVAAATAVFLIYPIGQGSFSDGMPLGISGTFNFMIVFQAEHNILMHPFHMLGVAGVFGGSLFSAMHGSLVTSSLIRETTENESANEGYRFGQEEETYNIVAAHGYFGRLIFQYASFNNSRSLHFFLAAWPVVGIWFTALGISTMAFNLNGFNFNQSVVDSQGRVINTWADIINRANLGMEVMHERNAHNFPLDLAAIEAPSTNG	367	39343	13	11
285	384	gi|16119014|gb|AAL14703.1|AF420302_1	photosystem II D1 protein [Amaranthus powellii]	MTAILERRESESLWGRFCNWITSTENRLYIGWFGVLMIPTLLTATSVFIIAFIAAPPVDIDGIREPVSGSLLYGNNIISGAIIPTSAAIGLHFYPIWEAASVDEWLYNGGPYELIVLHFLLGVACYMGREWELSFRLGMRPWIAVAYSAPVAAATAVFLIYPIGQGSFSDGMPLGISGTFNFMIVFQAEHNILMHPFHMLGVAGVFGGSLFSAMHGSLVTSSLIRETTENESANEGYRFGQEEETYNIVAAHGYFGRLIFQYASFNNSRSLHFFLAAWPVIGIWFTALGISTMAFNLNGFNFNQSVVDSQGRVINTWADIINRANLGMEVMHERNAHNFPLDLAAIEA	367	38902	13	11
285	384	gi|166065337|gb|ABY79712.1|	photosystem II protein D1 [Fagopyrum esculentum subsp. ancestrale] >gi|189162251|ref|YP_001936497.1| photosystem II protein D1 [Fagopyrum esculentum subsp. ancestrale]	MTAILERRESESLWGRFCNWITSTENRLYIGWFGVLMIPTLLTATSVFIIAFIAAPPVDIDGIREPVSGSLLYGNNIISGAIIPTSAAIGLHFYPIWEAASVDEWLYNGGPYELIVLHFLLGVACYMGREWELSFRLGMRPWIAVAYSAPVAAATAVFLIYPIGQGSFSDGMPLGISGTFNFMIVFQAEHNILMHPFHMLGVAGVFGGSLFSAMHGSLVTSSLIRETTENESANEGYRFGQEEETYNIVAAHGYFGRLIFQYASFNNSRSLHFFLAAWPVVGIWFTALGISTMAFNLNGFNFNQSVVDSQGRVINTWADIINRANLGMEVMHERNAHNFPLDLAATQAPSING	367	39343	13	11
285	384	gi|18031687|gb|AAK50366.1|	Q(B) polypeptide [Medicago sativa]	WGRFCNWITSTENRLYIGWFGVLMIPTLLTATSVFIIAFIAAPPVDIDGIREPVSGSLLYGNNIISGAIIPTSAAIGLHFYPIWEAASVDEWLYNGGPYELIVLHFLLGVACYMGREWELSFRLGMRPWIAVAYSAPVAAATAVFLIYPIGQGSFSDGMPLGISGTFNFMIVFQAEHNILMHPFHMLGVAGVFGGSLFSAMHGSLVTSSLIRETTENESANEGYRFGQEEETYNIVAAHGYFGRLIFQYASFNNSRSLHFFLAAWPVVGIWFTALGISTMAFNLNGFNFNQSVVDSQGRVINTWADIINRANLGMEVMHERNAHNFPLDLAAVEAPSING	367	37826	13	11
285	384	gi|190360054|sp|A8SE40.1|PSBA_CERDE	RecName: Full=Photosystem Q(B) protein; AltName: Full=32 kDa thylakoid membrane protein; AltName: Full=Photosystem II protein D1; Flags: Precursor >gi|159161140|ref|YP_001542427.1| photosystem II protein D1 [Ceratophyllum demersum] >gi|148508423|gb|	MTAILERRESASLWGRFCNWITSTENRLYIGWFGVLMIPTLLTATSVFIIAFIAAPPVDIDGIREPVSGSLLYGNNIISGAIIPTSAAIGLHFYPIWEAASVDEWLYNGGPYELIVLHFLLGVACYMGREWELSFRLGMRPWIAVAYSAPVAAATAVFLIYPIGQGSFSDGMPLGISGTFNFMIVFQAEHNILMHPFHMLGVAGVFGGSLFSAMHGSLVTSSLIRETTENESANEGYRFGQEEETYNIVAAHGYFGRLIFQYASFNNSRSLHFFLAAWPVVGIWFTALGISTMAFNLNGFNFNQSVVDSQGRVINTWADIINRANLGMEVMHERNAHNFPLDLAAVEAPSTNG	367	39272	13	11
285	384	gi|190360058|sp|A8W3A5.1|PSBA_CUSEX	RecName: Full=Photosystem Q(B) protein; AltName: Full=32 kDa thylakoid membrane protein; AltName: Full=Photosystem II protein D1; Flags: Precursor >gi|159161234|ref|YP_001542512.1| photosystem II protein D1 [Cuscuta exaltata]	MTAILERRESENLWGRFCNWITSTENRLYIGWFGVLMIPTLLTATSVFIIAFIAAPPVDIDGIREPVSGSLLYGNNIISGAIIPTSAAIGLHFYPIWEAASVDEWLYNGGPYELIVLHFLLGVACYMGREWELSFRLGMRPWIAVAYSAPVAAATAVFLIYPIGQGSFSDGMPLGISGTFNFMIVFQAEHNILMHPFHMLGVAGVFGGSLFSAMHGSLVTSSLIRETTENESANEGYRFGQEEETYNIVAAHGYFGRLIFQYASFNNSRSLHFFLAAWPVVGIWFTALGISTMAFNLNGFNFNQSVVDSQGRVINTWADIINRANLGMEVMHERNAHNFPLDLAAIEAPATNG	367	39355	13	11
285	384	gi|197132082|gb|ACH47559.1|	photosystem II protein D1 [Erodium chrysanthum]	MTAILERRESESLWGRFCNWITSTENRLYIGWFGVLMIPTLLTATSVFLIAFIAAPPVDIDGIREPVSGSLLYGNNIISGAIIPTSAAIGLHFYPIWEAASVDEWLYNGGPYELIVLHFLLGVACYMGREWELSFRLGMRPWIAVAYSAPVAAATAVFLIYPIGQGSFSDGMPLGISGTFNFMIVFQAEHNILMHPFHMLGVAGVFGGSLFSAMHGSLVTSSLIRETTENESANEGYRFGQEEETYNIVAAHGYFGRLIFQYASFNNSRSLHFFLAAWPVVGIWFTALGISTMAFNLNGFNFNQSVVDSQGRVINTWADIINRANLGMEVMHERNAHNFPLDLAASEVPSING	367	39358	13	11
285	384	gi|197132086|gb|ACH47561.1|	photosystem II protein D1 [Geranium carolinianum]	MTAILERRESKSLWGRFCNWITSTENRLYIGWFGVLMIPTLLTATSVFIIAFIAAPPVDIDGIREPVSGSLLYGNNIISGAIIPTSAAIGLHFYPIWEAASVDEWLYNGGPYELIVLHFLLGVACYMGREWELSFRLGMRPWIAVAYSAPVAAATAVFLIYPIGQGSFSDGMPLGISGTFNFMIVFQAEHNILMHPFHMLGVAGVFGGSLFSAMHGSLVTSSLIRETTENESANEGYRFGQEEETYNIVAAHGYFGRLIFQYASFNNSRSLHFFLAAWPVVGIWFTALGISTMAFNLNGFNFNQSVVDSQGRVINTWADIINRANLGMEVMHERNAHNFPLDLAAVEVPSING	367	39673	13	11
285	384	gi|197132088|gb|ACH47562.1|	photosystem II protein D1 [Geranium macrorrhizum]	MTAILERRESESLWGRFCNWITSTENRLYIGWFGVLMIPTLLTATSVFIIAFIAAPPVDIDGIREPVSGSLLYGNNIISGAIIPTSAAIGLHFYPIWEAASVDEWLYNGGPYELIVLHFLLGVACYMGREWELSFRLGMRPWIAVAYSAPVAAATAVFLIYPIGQGSFSDGMPLGISGTFNFMIVFQAEHNILMHPFHMLGVAGVFGGSLFSAMHGSLVTSSLIRETTENESANEGYRFGQEEETYNIVAAHGYFGRLIFQYASFNNSRSLHFFLAAWPVVGIWFTALGISTMAFNLNGFNFNQSVVDSQGRVINTWADIINRANLGMEVMHERNAHNFPLDLATVEVQSING	367	39431	13	11
285	384	gi|197132094|gb|ACH47565.1|	photosystem II protein D1 [Monsonia vanderietiae] >gi|262400777|gb|ACY66266.1| photosystem II protein D1 [Brassica napus]	MTAILERRESESLWGRFCNWITSTENRLYIGWFGVLMIPTLLTATSVFIIAFIAAPPVDIDGIREPVSGSLLYGNNIISGAIIPTSAAIGLHFYPIWEAASVDEWLYNGGPYELIVLHFLLGVACYMGREWELSFRLGMRPWIAVAYSAPVAAATAVFLIYPIGQGSFSDGMPLGISGTFNFMIVFQAEHNILMHPFHMLGVAGVFGGSLFSAMHGSLVTSSLIRETTENESANEGYRFGQEEETYNIVAAHGYFGRLIFQYASFNNSRSLHFFLAAWPVVGIWFTALGISTMAFNLNGFNFNQSVVDSQGRVINTWADIINRANLGMEVMHERNAHNFPLDLAAVEAPSING	367	39342	13	11
285	384	gi|197132096|gb|ACH47566.1|	photosystem II protein D1 [Pelargonium cotyledonis]	MTAILERRENESLWGRFCNWITSTENRLYIGWFGVLMIPTLLTATSVFIIAFIAAPPVDIDGIREPVSGSLLYGNNIISGAIIPTSAAIGLHFYPIWEAASVDEWLYNGGPYELIVLHFLLGVACYMGREWELSFRLGMRPWIAVAYSAPVAAATAVFLIYPIGQGSFSDGMPLGISGTFNFMIVFQAEHNILMHPFHMLGVAGVFGGSLFSAMHGSLVTSSLIRETTENESANEGYRFGQEEETYNIVAAHGYFGRLIFQYASFNNSRSLHFFLAAWPVVGIWFTALGISTMAFNLNGFNFNQSVVDSQGRVINTWADIINRANLGMEVMHERNAHNFPLDLAAVEAPSTNG	367	39357	13	11
285	384	gi|19920149|gb|AAM08581.1|AC092750_15	Putative PSII 32kDa protein from chromosome 10 chloroplast insertion [Oryza sativa Japonica Group] >gi|31431462|gb|AAP53235.1| Photosystem Q, putative, expressed [Oryza sativa Japonica Group]	MTAILERRESTSLWGRFCNWITSTENRLYIGWFGVLMIPTLLTATSVFIIAFIAAPPVDIDGIREPVSGSLLYGNNIISGAIIPTSAAIGLHFYPIWEAASVDEWLYNGGPYELIVLHFLLGVACYMGREWELSFRLGMRPWIAVVYSAPVAAATAVFLIYPIGQGSFSDGMPLGISGTFNFMIVFQAEHNILMHPFHMLGVAGVFGGSLFSAMHGSLVTSSLIRETTENESANEGYRFGQEEETYNIVAAHGYFGRLIFQYASFNNSRSLHFFLAAWPVVGIWFTALGISTMAFNLNGFNFNQSVVDSQGRVINTWADIINRANLGMEVMHERNAHNFPLDLAALEVPSLNG	367	39384	13	11
285	384	gi|20147557|gb|AAM12551.1|AF492360_1	photosystem II protein D1 [Populus alba]	ENRLYIGWFGVLMIPTLLTATSVFIIAFIAAPPVDIDGIREPVSGSLLYGNNIISGAIIPTSAAIGLHFYPIWEAASVDEWLYNGGPYELIVLHFLLGVACYMGREWELSFRLGMRPWIAVAYSAPVAAATAVFLIYPIGQGSFSDGMPLGISGTFNFMIVFQAEHNILMHPFHMLGVAGVFGGSLFSAMHGSLVTSSLIRETTENESANEGYRFGQEEETYNIVAAHGYFGRLIFQYASFNNSRSLHFFLAAWPVVGIWFTALGISTMAFNLNGFNFNQSVVDSQGRVINTWADIINRANLGMEVMHERNPHN	367	34949	13	11
285	384	gi|21154|emb|CAA25093.1|	unnamed protein product [Sinapis alba] >gi|131257|sp|P11848.3|PSBA_SINAL RecName: Full=Photosystem Q(B) protein; AltName: Full=32 kDa thylakoid membrane protein; AltName: Full=Photosystem II protein D1; Flags: Precursor	MTAILERRESESLWGRFCNWITSTENRLYIGWFGVLMIPTLLTATSVFIIAFIAAPPVDIDGIREPVSGSLLYGNNIISGAIIPTSAAIGLHFYPIWEAASVDEWLYNGGPYELIVLHFLLGVACYMGREWELSFRLGMRPWIAVAYSAPVAAATAVFLIYPIGQGSFSDGMPLGISGTFNFMIVFQAEHNILMHPFHMLGVAGVFGGSLFSAMHGSLVTSSLIRETTENESANEGYRFGQEEETYNIVAAHGYFGRLIFQYASFNNSRSLHFFLAAWPVVGIWFTALGISTMAFNLNGFNFNQSVVDSQGRVINTWADIINRANLGMEVMHERNAHNFPLDLAAVESPSING	367	39358	13	11
285	384	gi|21449452|gb|AAM54140.1|AF515633_1	D1 protein [Thrixspermum formosanum]	ESTSLWGRFCNWITSTENRLYIGWFGVLMIPTLLTATSVFIIVFIAAPPVDIDGIREPVSGSLLYGNNIISGAIIPTSAAIGLHFYPIWEAASVDEWLYNGGPYELIVLHFLLGVACYMGREWELSFRLGMRPWIAVAYSAPVAAATAVFLIYPIGQGSFSDGMPLGISGTFNFMIVFQAEHNILMHPFHMLGVAGVFGGSLFSAMHGSLVTSSLIRETTENESANEGYRFGQEEETYNIVAAHGYFGRLIFQYASFNNSRSLHFFLAAWPVVGIWFTALGISTMAFNLNGFNFNQSVVDSQGRVINTWADIINRANLGMEVMHERNAHNFPLDLASV	367	37719	13	11
285	384	gi|217072674|gb|ACJ84697.1|	unknown [Medicago truncatula]	MTAILERRDSENLWSRFCNWITSTENRLYIGWFGVLMIPTLLTATSVFIIAFIAAPPVDIDGIREPVSGTLLYGNNIISGAIIPTSAAIGLHFYPIWEAASVDEWLYNGGPYELIVLHFLLGVACYMGREWELSFRLGMRPWIAVAYSAPVAAATAVFLIYPIGQGSFSDGMPLGISGTFNFMIVFQAEHNILMHPFHMLGVAGVFGGSLFSAMHGSLVTSSLIRETTENESANEGYRFGQEEETYNIVAAHGYFGRLIFQYASFNNSRSLHFFLAAWPVVGIWFTALGISTMAFNLNGFNFNQSVVDSQGRVINTWADIINRANLGMEVMHERNAHNFPLDLAAVEAPSING	367	39399	13	11
285	384	gi|2197014|gb|AAB61275.1|	D1 protein, photosystem II [Acorus gramineus]	WFGVLMIPTLLTATSVFIIAFIAAPPVDIDGIREPVSGSLLYGNNIISGAIIPTSAAIGLHFYPIWEAASVDEWLYNGGPYELIVLHFLLGVACYMGREWELSFRLGMRPWIAXXXXXXXXXXXXXFLIYPIGQGSFSDGMPLGISGTXNFMIVFQAEHNIXMHPFHMLGVAGVFGGSLFSAMHGSLVTSSLIRETTENXSANEGYRFGQEEETYNIVAAHGYFGRLIFQYASFNNSRSLHFFLAAWPVVGIWFTALGISTMAFNLNGFNFNQSVVDSQGRVIXTWADXINRANLGMEVMHERNAHNFP	367	34531	13	11
285	384	gi|223535112|gb|EEF36793.1|	Photosystem Q(B) protein, putative [Ricinus communis] >gi|255569246|ref|XP_002525591.1| Photosystem Q(B) protein, putative [Ricinus communis]	MTAILERRESKSLWGHFYNWITSTENRLYIGWFVVLMIPTLLTATSVFIIAFIAAPPVDIDGIREPISGSLLYGNNIISGAIIPTSTAIGLHFYPIWEAGSVDEWLYNGGPYELIVLHFLLGVACYMGREWELSFHLGMRPWIAVAYSALVAAATAVFLIYPIGQGSFSDGMPLXHNILMHPFHMLGVAGVFGGSLFSAMHGSLVTSSLIRETTENESANEGYRFGQEEETYNIVAAHGYFGRLIFQYASFNNSRSLHFFLAAWPVVVDSQGRVINTWADIINRANLGMEVMHERNAHNFPLDLAAVEALSTNG	367	35441	13	11
285	384	gi|223537507|gb|EEF39132.1|	Photosystem Q(B) protein, putative [Ricinus communis] >gi|255564430|ref|XP_002523211.1| Photosystem Q(B) protein, putative [Ricinus communis]	MTAILERRESESLWGRFCNWITNTENRLYIGWFGVLMIPTLLTATSVFIIAFIAAPLVDIDGIREPVSRSLLYGNNIISGAIIPTSAAIGLHFYPIWEAASVDEWLHNGSPYELIVLHFLLGVACYMGHEWELSFCLGMRPWIAVAYSAPVAAATAVFLIYPIGQGSFSDGMPLGISSTFNFKIVFQAEHNILMHPFHMLGVASVFGGSLFSAMHGSLVTSSLIRETTENESANEGYRFGQEEETYNIVAAHGYFGRLIFQYASFNNSRSLHFFLAAWPVVGIWFTALGISTMAFNPNGFNFNQSVVDSQGRVINTWADIINRANLGMEVMHERNTHNFPLDLAAVEAPSTNG	367	39836	13	11
285	384	gi|223835|prf||1001242A	protein psbA >gi|336306|gb|AAA84445.1| psbA [Amaranthus hybridus]	MIPTLLTATSVFIIAFIAAPPVDIDGIREPVSGSLLYGNNIISGAIIPTSAAIGLHFYPIWEAASVDEWLYNGGPYELIVLHFLLGVACYMGREWELSFRLGMRPWIAVAYSAPVAAATAVFLIYPIGQGSFSDGMPLGISGTFNFMIVFQAEHNILMHPFHMLGVAGVFGGSLFSAMHGSLVTSSLIRETTENESANEGYRFGQEEETYNIVAAHGYFGRLIFQYASFNNSRSLHFFLAAWPVIGIWFTALGISTMAFNLNGFNFNQSVVDSQGRVINTWADIINRANLGMEVMHERNAHNFPLDLAAIEAPSTNG	367	34986	13	11
285	384	gi|225195|prf||1211235A	photosystem II 32kD protein	MTAILERRESESLWGRFCNWITSTENRLYIGWFGVLMIPTLLTATSVFIIAFIAAPPVDIDGIREPVSGSLLYGNNIISGAIIPTSAAIGLHFYPIWEAASVHEWLYNGGPYELIVLHFLLGVACYMGREWELSFRLGMRPWIAVAYSAPVAAATAVFLIYPIGQGSFSDGMPLGISGTFNFMIVFQAEHNILMHPFHMLGVAGVFGGSLFSAMHGSLVTSSLIRETTENESANEGYRFGQEEETYNIVAAHGYFGRLIFQYASFNNSRSLHFFLAAWPVVGIWFTALGISTMAFNLNGFNFNQSVVDSQGRVINTWADIINRANLGMEVMHERNAHNFPLDLAAIEAPSTNG	367	39366	13	11
285	384	gi|226933862|gb|ACO91995.1|	photosystem II protein D1 [Megaleranthis saniculifolia] >gi|229577734|ref|YP_002836070.1| photosystem II protein D1 [Megaleranthis saniculifolia]	MTAILERRESESLWGRFCNWVTSTENRLYIGWFGVLMIPTLLTATSVFIIAFIAAPPVDIDGIREPVSGSLLYGNNIISGAIIPTSAAIGLHFYPIWEAASVDEWLYNGGPYELIVLHFLLGVACYMGREWELSFRLGMRPWIAVAYSAPVAAATAVFLIYPIGQGSFSDGMPLGISGTFNFMIVFQAEHNILMHPFHMLGVAGVFGGSLFSAMHGSLVTSSLIRETTENESANEGYRFGQEEETYNIVAAHGYFGRLIFQYASFNNSRSLHFFLAAWPVVGIWFTALGISTMAFNLNGFNFNQSVVDSQGRVINTWADIINRANLGMEVMHERNAHNFPLDLAAVEVPSTNG	367	39344	13	11
285	384	gi|227481099|emb|CAP62478.1|	PSII 32 kD protein [Ceratophyllum demersum]	MTAILERRESASLWGRFCNWITSTENRLYIGWFGVVMIPTLLTATSVFIIAFIAAPPVDIDGIREPVSGSLLYGNNIISGAIIPTSAAIGLHFYPIWEAASVDEWLYNGGPYELIVLHFLLGVACYMGREWELSFRLGMRPWIAVAYSAPVAAATAVFLIYPIGQGSFSDGMPLGISGTFNFMIVFQAEHNILMHPFHMLGVAGVFGGSLFSAMHGSLVTSSLIRETTENESANEGYRFGQEEETYNIVAAHGYFGRLIFQYASFNNSRSLHFFLAAWPVVGIWFTALGISTMAFNLNGFNFNQSVVDSQGRVINTWADIINRANLGMEVMHERNAHNFPLDLAAVEAPSTNG	367	39258	13	11
285	384	gi|239736645|gb|ACS13029.1|	PsbA [Oryza sativa] >gi|239736627|gb|ACS13020.1| PsbA [Oryza sativa] >gi|239736633|gb|ACS13023.1| PsbA [Oryza sativa] >gi|239736649|gb|ACS13031.1| PsbA [Oryza sativa] >gi|239736635|gb|ACS13024.1| PsbA [Oryza sativa] >gi|239736637|gb|ACS13025.1| PsbA	PWIAVAYSAPVAAATAVFLIYPIGQGSFSDGMPLGISGTFNFMIVFQAEHNILMHPFHMLGVAGVFGGSLFSAMHGSLVTSSLIRETTENESANEGYRFGQEEETYNIVAAHGYFGRLIFQYASFNNSRSLHFFLAAWPVVGIWFTALGISTMAFNLNGFNFNQSVVDSQGRVINTWADIINRA	367	20425	13	11
285	384	gi|239786289|gb|ACS16376.1|	photosystem II protein D1 [Chlamydomonas reinhardtii] >gi|239786299|gb|ACS16381.1| photosystem II protein D1 [Chlamydomonas reinhardtii] >gi|239786293|gb|ACS16378.1| photosystem II protein D1 [Chlamydomonas reinhardtii] >gi|239786291|gb|ACS16377.1|	FQAEHNILMHPFHMLGVAGVFGGSLFSAMHGSLVTSSLIRETTENESANEGYRFGQEEETYNIVAAHGYFGRLIFQYASFNNSRSLHFFLAAWPVIGIWFTALGLSTMAFNLNGFNFNQSVVDSQGRVLNTWADIINRANLGMEV	367	16454	13	11
285	384	gi|240152470|gb|ACS45310.1|	photosystem II protein D1 [Bletia roezlii]	TSLWGRFCNWITSTENRLYIGWFGVLMIPTLLTATSVFIIAFIAAPPVDIDGIREPVSGSLLYGNNIISGAIIPTSAAIGLHFYPIWEAASVDEWLYNGGPYELIVLHFLLGVACYMGREWELSFRLGMRPWIAVAYSAPVAAATAVFLIYPIGQGSFSDGMPLGISGTFNFMIVFQAEHNILMHPFHMLGVAGVFGGSLFSAMHGSLVTSSLIRETTENESANEGYRFGQEEETYNIVAAHGYFGRLIFQYASFNNSRSLH	367	29230	13	11
285	384	gi|240152477|gb|ACS45311.1|	photosystem II protein D1 [Hexalectris grandiflora]	ESTSLWGRFCNWITSTENRLYIGWFGVLMIPTLLTATSVFIIAFIAAPPVDIDGIREPVSGSLLYGNNIISGAIIPTSAAIGLHFYPIWEAASVDEWLYNGGPYELIVLHFLLGVACYMGREWELSFRLGMRPWIAVAYSAPVAAATAVFLIYPIGQGSFSDGMPLGISGTFNFMIVFQAEHNILMHPFHMLGVAGVFGGSLFSAMHGSLVTSSLIRETTENESANEGYRFGQEEETYNIVAAHGYFGRLIFQYASFNNSRSLHFF	367	29740	13	11
285	384	gi|240152482|gb|ACS45313.1|	photosystem II protein D1 [Hexalectris grandiflora]	STSLWGRFCNWITSTENRLYIGWFGVLMIPTLLTATSVFIIAFIAAPPVDIDGIREPVSGSLLYGNNIISGAIIPTSAAIGLHFYPIWEAASVDEWLYNGGPYELIVLHFLLGVACYMGREWELSFRLGMRPWIAVAYSAPVAAATAVFLIYPIGQGSFSDGMPLGISGTFNFMIVFQAEHNILMHPFHMLGVAGVFGGSLFSAMHGSLVTSSLIRETTENESANEGYRFGQEEETYNIVAAHGYFGRLIFQYASFNNSRSLHF	367	29464	13	11
285	384	gi|254553651|gb|ACT67284.1|	photosystem II protein D1 [Joinvillea plicata]	MTAILERRESTSLWGRFCNWITSTENRLYIGWFGVLMIPTLLTATSVFIIAFIAAPPVDIDGIREPVSGSLLYGNNIISGAIIPTSAAIGLHFYPIWEAASVDEWLYNGGPYELIVLHFLLGVACYMGREWELSFRLGMRPWIAVAYSAPVAAATAVFLIYPIGQGSFSDGMPLGISGTFNFMIVFQAEHNILMHPFHMLGVAGVFGGSLFSAMHGSLVTSSLIRETTENESANEGYRFGQEEETYNIVAAHGYFGRLIFQYASFNNSRSLHFFLAAWPVVGIWFTALGISTMAFNLNGFNFNQSVVDSQGRVINTWADIINR	367	36115	13	11
285	384	gi|259019995|gb|ACV90193.1|	photosystem II protein D1 [Vigna radiata] >gi|171259253|ref|YP_001122788.2| photosystem II protein D1 [Phaseolus vulgaris] >gi|289066808|ref|YP_003434326.1| photosystem II protein D1 [Vigna radiata] >gi|152112515|sp|Q01366.2|PSBA_PHAVU RecName: Full	MTAILERRESESLWGRFCNWITSTENRLYIGWFGVLMIPTLLTATSVFIIAFIAAPPVDIDGIREPVSGSLLYGNNIISGAIIPTSAAIGLHFYPIWEAASVDEWLYNGGPYELIVLHFLLGVACYMGREWELSFRLGMRPWIAVAYSAPVAAATAVFLIYPIGQGSFSDGMPLGISGTFNFMIVFQAEHNILMHPFHMLGVAGVFGGSLFSAMHGSLVTSSLIRETTENESANEGYRFGQEEETYNIVAAHGYFGRLIFQYASFNNSRSLHFFLAAWPVVGIWFTALGISTMAFNLNGFNFNQSVVDSQGRVINTWADIINRANLGMEVMHERNAHNFPLDLAAMEAPSVNG	367	39360	13	11
285	384	gi|261888172|gb|ACY06027.1|	photosystem II protein D1 [Volvox carteri f. nagariensis] >gi|261888212|gb|ACY06067.1| photosystem II protein D1 [Volvox carteri f. nagariensis]	MTAILERRENSSLWARFCEWITSTENRLYIGWFGVIMIPCLLTATSVFIIAFIAAPPVDIDGIREPVSGSLLYGNNIITGAVVPTSNAIGLHFYPIWEAASLDEWLYNGGPYQLIVCHFLLGVYCYMGREWELSFRLGMRPWIAVAYSAPVAAASAVFLVYPIGQGSFSDGMPLGISGTFNFMIVFQAEHNILMHPFHMLGVAGVFGGSLFSAMHGSLVTSSLIRETTENESANEGYRFGQEEETYNIVAAHGYFGRLIFQYASFNNSRSLHFFLAAWPVIGIWFTALGLSTMAFNLNGFNFNQSVVDSQGRVLNTWADIINRANLGMEVMHERNAHNFPLDLASNNNSSMN	367	39592	13	11
285	384	gi|281371752|gb|ADA63679.1|	photosystem II protein D1 [Typha latifolia] >gi|289065069|ref|YP_003433955.1| photosystem II protein D1 [Typha latifolia] >gi|69217630|gb|AAZ04091.1| photosystem II protein D1 [Typha latifolia]	MTAILERRESTSLWGRFCNWITSTENRLYIGWFGVLMIPTLLTATSVFIIAFIAAPPVDIDGIREPVSGSLLYGNNIISGAIIPTSAAIGLHFYPIWEAASVDEWLYNGGPYELIVLHFLLGVACYMGREWELSFRLGMRPWIAVAYSAPVAAATAVFLIYPIGQGSFSDGMPLGISGTFNFMIVFQAEHNILMHPFHMLGVAGVFGGSLFSAMHGSLVTSSLIRETTENESANEGYRFGQEEETYNIVAAHGYFGRLIFQYASFNNSRSLHFFLAAWPVVGIWFTALGISTMAFNLNGFNFNQSVVDSQGRVINTWADIINRANLGMEVMHERNAHNFPLDLAAVEVPSING	367	39342	13	11
285	384	gi|284822103|gb|ADB98057.1|	photosystem II protein D1 [Panax notoginseng]	ESESLWGRFCNWITSTENRLYIGWFGVLMIPTLLTATSVFIIAFIAAPPVDIDGIREPVSGSLLYGNNIISGAIIPTSAAIGLHFYPIWEAASVDEWLYNGGPYELIVLHFLLGVACYMGREWELSFRLGMRPWIAVAYSAPVAAAAAVFLIYPIGQGSFSDGMPLGISGTFNFMIVFQAEHNILMHPFHMLGVAGVFGGSLFSAMHGSLVTSSLIRETTENESANEGYRFGQEEETYNIVAAHGYFGRLIFQYASFNNSRSLHFFLAAWPVVGIWFTALGISTMAFNLNGFNFNQSVVDSQGRVINTWADIINRANLG	367	35498	13	11
285	384	gi|28564242|emb|CAA35688.2|	psbA [Vicia faba] >gi|41019233|sp|P13910.2|PSBA_VICFA RecName: Full=Photosystem Q(B) protein; AltName: Full=32 kDa thylakoid membrane protein; AltName: Full=Photosystem II protein D1; Flags: Precursor	MTAILERRDSENLWGRFCNWITTTENRLYIGWFGVLMIPTLLTATSVFIIAFIAAPPVDIDGIREPVSGSLLYGNNIISGAIIPTSAVIGLHFYPIWEAASVDEWLYNGGPYELIVLHFLLGVACYMGREWELSFRLGMRPWIVVAYSAPVAAATAVFLIYPIGQGSFSDGMPLGISGTFNFMIVFQAEHNILMHPFHMLGVAGVFGGSLFSAMHGSLVTSSLIRETTENESANEGYRFGQEEETYNIVAAHGYFGRLIFQYASFNNSRSLHFFLAAWPVVGIWFTALGISTMAFNLNGFNFNQSVVDSQGRVINTWADIINRANLGMEVMHERNAHNFPLDLAAVDAPSISG	367	39384	13	11
285	384	gi|28630975|gb|AAO45886.1|	photosystem II D1 protein [Pyrus communis]	ENRLYIGWFGVLMIPTLLTATSVFIIAFIAAPPVDIDGIREPVSGSLLYGNNIISGAIIPTSATIGLHFYPIWEAASVDEWLYNGGPYELIVLHFLLGVACYMGREWELSFRLGMRPWIAVAYSAPVAAGTAVFLKYPIGQGSFSAGMHLGISGTFNFMIVFQAEHNILMHPFHMLGVAGVFGGSLFSAMHGSLVTSSLIRETTENESANEGYRFGQEEETYNIVAAHGYFGRLIFQYASFNNSRSLHFFLAAWPVVGIWFTALGISTMAFNLNGFNFNQSVVDSQGRVINTWADIINRANLGMEVMHERNAHN	367	35254	13	11
285	384	gi|290488416|gb|ADD30592.1|	photosystem II protein D1 [Antirrhinum majus]	MTAILERRESQSLWGRFCNWITSTENRLYIGWFGVLMIPTLLTATSVFIIAFIAAPPVDIDGIREPVSGSLLYGNNIISGAIIPTSAAIGLHFYPIWEAASVDEWLYNGGPYELIVLHFLLGVACYMGREWELSFRLGMRPWIAVAYSAPVAAATAVFLIYPIGQGSFSDGMPLGISGTFNFMIVFQAEHNILMHPFHMLGVAGVFGGSLFSAMHGSLVTSSLIRETTENESANEGYRFGQEEETYNIVAAHGYFGRLIFQYASFNNSRSLHFFLAAWPVVGIWFTALGISTMAFNLNGFNFNQSVVDSQGRVINTWADIINRANLGMEVMHERNAHNFPLDLAAIEAPTNG	367	39256	13	11
285	384	gi|290488426|gb|ADD30597.1|	photosystem II protein D1 [Lonicera japonica]	MTAILERRESESLWGRFCNWITSTENRLYIGWFGVLMIPTLLTATSVFIIAFIAAPPVDIDGIREPVSGSLLYGNNIISGAIIPTSAAIGLHFYPIWEAASVDEWLYNGGPYELIVLHFLLGVACYMGREWELSFRLGMRPWIAVAYSAPVAAATAVFLIYPIGQGSFSDGMPLGISGTFNFMIVFQAEHNILMHPFHMLGVAGVFGGSLFSAMHGSLVTSSLIRETTENESANEGYRFGQEEETYNIVAAHGYFGRLIFQYASFNNSRSLHFFLAAWPVVGIWFTALGISTMAFNLNGFNFNQSVVDSQGRVINTWADIINRANLGMEVMHERNAHNFPLDLAALEAPSTNG	367	39344	13	11
285	384	gi|290488428|gb|ADD30598.1|	photosystem II protein D1 [Meliosma aff. cuneifolia Moore 333] >gi|75254109|sp|Q68S26.1|PSBA_PANGI RecName: Full=Photosystem Q(B) protein; AltName: Full=32 kDa thylakoid membrane protein; AltName: Full=Photosystem II protein D1; Flags: Precursor >gi	MTAILERRESESLWGRFCNWITSTENRLYIGWFGVLMIPTLLTATSVFIIAFIAAPPVDIDGIREPVSGSLLYGNNIISGAIIPTSAAIGLHFYPIWEAASVDEWLYNGGPYELIVLHFLLGVACYMGREWELSFRLGMRPWIAVAYSAPVAAAAAVFLIYPIGQGSFSDGMPLGISGTFNFMIVFQAEHNILMHPFHMLGVAGVFGGSLFSAMHGSLVTSSLIRETTENESANEGYRFGQEEETYNIVAAHGYFGRLIFQYASFNNSRSLHFFLAAWPVVGIWFTALGISTMAFNLNGFNFNQSVVDSQGRVINTWADIINRANLGMEVMHERNAHNFPLDLAAVEAPSTNG	367	39300	13	11
285	384	gi|290488432|gb|ADD30600.1|	photosystem II protein D1 [Nerium oleander]	MTAILERRESESLWGRFCNWITSTENRLYIGWFGVLMIPTLLTATSVFIIAFIAAPPVDIDGIREPVSGSLLYGNNIISGAIIPTSAAIGLHFYPIWEAASVDEWLYNGGPYELIVLHFLLGVACYMGREWELSFRLGMRPWIAVAYSAPVAAATAVFLIYPIGQGSFSDGMPLGISGTFNFMIVFQAEHNILMHPFHMLGVAGVFGGSLFSAMHGSLVTSSLIRETTENESANEGYRFGQEEETYNIVAAHGYFGRLIFQYASFNNSRSLHFFLAAWPVVGIWFTALGISTMAFNLNGFNFNQSVVDSQGRVINTWADIINRANLGMEVMHERNAHNFPLDLAAIEAPSING	367	39356	13	11
285	384	gi|290488436|gb|ADD30602.1|	photosystem II protein D1 [Rhododendron simsii]	MTAILERRESESLWGRFCNWITSTENRLYIGWFGVLMIPTLLTATSVFIIAFIAAPPVDIDGIREPVSGSLLYGNNIISGAIIPTSAAIGLHFYPIWEAASVDEWLYNGGPYELIVLHFLLGVACYMGREWELSFRLGMRPWIAVAYSAPVAAATAVFLIYPIGQGSFSDGMPLGISGTFNFMIVFQAEHNILMHPFHMLGVAGVFGGSLFSAMHGSLVTSSLIRETTENESANEGYRFGQEEETYNIVAAHGYFGRLIFQYASFNNSRSLHFFLAAWPVVGIWFTALGISTMAFNLNGFNFNQSVVDSQGRVINTWADIINRANLGMEVMHERNAHNFPLDLAAIEAPSTTG	367	39331	13	11
285	384	gi|290488440|gb|ADD30604.1|	photosystem II protein D1 [Berberidopsis corallina]	MTVILERRESESLWGRFCNWITSTENRLYIGWFGVVMIPTLLTATSVFIIAFIAAPPVDIDGIREPVSGSLLYGNNIISGAIIPTSAAIGLHFYPIWEAASVDEWLYNGGPYELIVLHFLLGVACYMGREWELSFRLGMRPWIAVAYSAPVAAATAVFLIYPIGQGSFSDGMPLGISGTFNFMIVFQAEHNILMHPFHMLGVAGVFGGSLFSAMHGSLVTSSLIRETTENESANEGYRFGQEEETYNIVAAHGYFGRLIFQYASFNNSRSLHFFLAAWPVVGIWFTALGISTMAFNLNGFNFNQSVVDSQGRVINTWADIINRANLGMEVMHERNAHNFPLDLAAIEAPSTNG	367	39358	13	11
285	384	gi|290488444|gb|ADD30606.1|	photosystem II protein D1 [Cornus florida]	MTAILERRESESLWGRFCNWITSTENRLYIGWFGVVMIPTLLTATSVFIIAFIAAPPVDIDGIREPVSGSLLYGNNIISGAIIPTSAAIGLHFYPIWEAASVDEWLYNGGPYELIVLHFLLGVACYMGREWELSFRLGMRPWIAVAYSAPVAAATAVFLIYPIGQGSFSDGMPLGISGTFNFMIVFQAEHNILMHPFHMLGVAGVFGGSLFSAMHGSLVTSSLIRETTENESANEGYRFGQEEETYNIVAAHGYFGRLIFQYASFNNSRSLHFFLAAWPVVGIWFTALGISTMAFNLNGFNFNQSVVDSQGRVINTWADIINRANLGMEVMHERNAHNFPLDLAAIEAPSTNG	367	39330	13	11
285	384	gi|290488458|gb|ADD30613.1|	photosystem II protein D1 [Plumbago auriculata]	MTAILERRESESLWGRFCNWITSTENRLYIGWFGVLMIPTLLTATSVFIIAFIAAPPVDIDGIREPVSGSLLYGNNIISGAIIPTSAAIGLHFYPIWEAASVDEWLYNGGPYELIVLHFLLGVACYMGREWELSFRLGMRPWIAVAYSAPVAAATAVFLIYPIGQGSFSDGMPLGISGTFNFMIVFQAEHNILMHPFHMLGVAGVFGGSLFSAMHGSLVTSSLIRETTENESANEGYRFGQEEETYNIVAAHGYFGRLIFQYASFNNSRSLHFFLAAWPVVGIWFTALGISTMAFNLNGFNFNQSVVDSQGRVINTWADIINRANLGMEVMHERNAHNFPLDLAAIQAPSING	367	39355	13	11
285	384	gi|290488460|gb|ADD30614.1|	photosystem II protein D1 [Quercus nigra] >gi|225692194|gb|ACO06762.1| photosystem II protein D1 [Lithocarpus densiflorus] >gi|309321500|gb|ADO65040.1| photosystem II protein D1 [Castanea mollissima] >gi|313183973|ref|YP_004021130.1| photosystem II	MTAILERRESESLWGRFCNWITSTENRLYIGWFGVLMIPTLLTATSVFIIAFIAAPPVDIDGIREPVSGSLLYGNNIISGAIIPTSAAIGLHFYPIWEAASVDEWLYNGGPYELIVLHFLLGVACYMGREWELSFRLGMRPWIAVAYSAPVAAATAVFLIYPIGQGSFSDGMPLGISGTFNFMIVFQAEHNILMHPFHMLGVAGVFGGSLFSAMHGSLVTSSLIRETTENESANEGYRFGQEEETYNIVAAHGYFGRLIFQYASFNNSRSLHFFLAAWPVVGIWFTALGISTMAFNLNGFNFNQSVVDSQGRVINTWADIINRANLGMEVMHERNAHNFPLDLASVEAPSTNG	367	39346	13	11
285	384	gi|29470189|gb|AAO73131.1|	photosystem II protein D1 variant [Bassia scoparia]	IGQGSFSDGMPLGISGTFNFMIVFQAEHNILMHPFHMLGVAGVFGGSLFSAMHGSLITSSLIRETTENESANEGYRFGQEEETYNIVAAHGYFGRLIFQYASFNNSRSLHFFLAAWPVVGIWFTALGISTMAFNLNGFNFNQSVVDSQGRVINTWADIINRANLGMEVMHERNAHN	367	19800	13	11
285	384	gi|29470191|gb|AAO73132.1|	photosystem II protein D1 [Bassia scoparia]	IGQGSFSDGMPLGISGTFNFMIVFQAEHNILMHPFHMLGVAGVFGGSLFSAMHGSLVTSSLIRETTENESANEGYRFGQEEETYNIVAAHGYFGRLIFQYASFNNSRSLHFFLAAWPVVGIWFTALGISTMAFNLNGFNFNQSVVDSQGRVINTWADIINRANLGMEVMHERNAHN	367	19786	13	11
285	384	gi|295136901|ref|YP_003587733.1|	photosystem II protein D1 [Lathyrus sativus] >gi|293338623|gb|ADE43595.1| photosystem II protein D1 [Lathyrus sativus]	MTAILERRDSENLWGRFCNWITSTENRLYIGWFGVLMIPTLLTATSVFIIAFIAAPPVDIDGIREPVSGSLLYGNNIISGAIIPTSAAIGLHFYPIWEAASVDEWLYNGGPYELIVLHFLLGVACYMGREWELSFRLGMRPWIAVAYSAPVAAATAVFLIYPIGQGSFSDGMPLGISGTFNFMIVFQAEHNILMHPFHMLGVAGVFGGSLFSAMHGSLVTSSLIRETTENESANEGYRFGQEEETYNIVAAHGYFGRLIFQYASFNNSRSLHFFLAAWPVVGIWFTALGISTMAFNLNGFNFNQSVVDSQGRVINTWADIINRANLGMEVMHERNAHNFPLDLATVEAPSING	367	39385	13	11
285	384	gi|296936651|gb|ADH94324.1|	photosystem II protein D1 [Syzygium cumini]	MTAILERRVSESLWGRFCNWITSTENRLYIGWFGVLMIPTLLTATSVFIIAFIAAPPVDIDGIREPVSGSLLYGNNIISGAIIPTSAAIGLHFYPIWEAASVDEWLYNGGPYELIVLHFLLGVACYMGREWELSFRLGMRPWIAVAYSAPVAAATAVFLIYPIGQGSFSDGMPLGISGTFNFMIVFQAEHNILMHPFHMLGVAGVFGGYLFSAMHGSLVTSSLIRETTENESANEGYRFGQEEETYNIVAAHGYFGRLIFQYASFNNSRSLHFFLAAWPVVGIWFTALGISTMAFNLNGFNFNQSVVDSQGRVINTWADIINRANLGMEVMHERNAHNFPLDLAAIEAPSTNG	367	39390	13	11
285	384	gi|308742577|gb|ADO33428.1|	photosystem II protein D1 [Smilax china]	MTAILERRESTSLWGRFCNWITSTENRLYIGWFGVLMIPTLLTATSVFIIAFIAAPPVDIDGIREPVSGSLLYGNNIISGAIIPTSAAIGLHFYPIWEAASVDEWLYNGGPYELIVLHFLLGVACYMGREWELSFRLGMRPWIAVAYSAPVAAAAAVFLIYPIGQGSFSDGMPLGISGTFNFMIVFQAEHNILMHPFHMLGVAGVFGGSLFSAMHGSLVTSSLIRETTENESANEGYRFGQEEETYNIVAAHGYFGRLIFQYASFNNSRSLHFFLAAWPVVGIWFTALGISTMAFNLNGFNFNQSVVDSQGRVINTWADIINRANLGMEVMHERNAHNFPLDLAAVEAPSTNG	367	39272	13	11
285	384	gi|309322051|ref|YP_003933868.1|	photosystem II protein D1 [Erodium texanum] >gi|300069144|gb|ADJ66266.1| photosystem II protein D1 [Erodium texanum] >gi|197132084|gb|ACH47560.1| photosystem II protein D1 [Erodium texanum]	MTAILARRESESLWGRFCNWITSTENRLYIGWFGVLMIPTLLTATSVFIIAFIAAPPVDIDGIREPVSGSLLYGNNIISGAIIPTSAAIGLHFYPIWEAASVDEWLYNGGPYELIVLHFLLGVACYMGREWELSFRLGMRPWIAVAYSAPVAAATAVFLIYPIGQGSFSDGMPLGISGTFNFMIVFQAEHNILMHPFHMLGVAGVFGGSLFSAMHGSLVTSSLIRETTENESANEGYRFGQEEETYNIVAAHGYFGRLIFQYASFNNSRSLHFFLAAWPVVGIWFTALGISTMAFNLNGFNFNQSVVDSQGRVINTWADIINRANLGMEVMHERNAHNFPLDLAGVEVPSING	367	39298	13	11
285	384	gi|309322268|ref|YP_003934346.1|	photosystem II protein D1 [Monsonia speciosa] >gi|197132092|gb|ACH47564.1| photosystem II protein D1 [Monsonia speciosa] >gi|300069361|gb|ADJ66481.1| photosystem II protein D1 [Monsonia speciosa]	MTAILERRESESLWGRFCNWVTSTENRLYIGWFGVLMIPTLLTATSVFIIAFIAAPPVDIDGIREPVSGSLLYGNNIISGAIIPTSAAIGLHFYPIWEAASVDEWLYNGGPYELIVLHFLLGVACYMGREWELSFRLGMRPWIAVAYSAPVAAATAVFLIYPIGQGSFSDGMPLGISGTFNFMIVFQAEHNILMHPFHMLGVAGVFGGSLFSAMHGSLVTSSLIRETTENESANEGYRFGQEEETYNIVAAHGYFGRLIFQYASFNNSRSLHFFLAAWPVVGIWFTALGISTMAFNLNGFNFNQSVVDSQGRVINTWADIINRANLGMEVMHERNAHNFPLDLAAVEAPSING	367	39328	13	11
285	384	gi|313199683|ref|YP_004021297.1|	photosystem II protein D1 [Theobroma cacao] >gi|309321247|gb|ADO64790.1| photosystem II protein D1 [Theobroma cacao]	MTAILERRESESLWGRFCNWITSTENRLYIGWFGVLMIPTLLTATSVFIIAFIAAPPVDIDGIREPVSGSLLYGNNIISGAIIPTSAAIGLHFYPIWEAASVDEWLYNGGPYELIVLHFLLGVACYMGREWELSFRLGMRPWIAVAYSAPVAAAAAVFLIYPIGQGSFSDGMPLGISGTFNFMIVFQAEHNILMHPFHMLGVAGVFGGSLFSAMHGSLVTSSLIRETTENESANEGYRFGQEEETYNIVAAHGYFGRLIFQYASFNNSRSLHFFLAAWPVVGIWFTALGISTMAFNLNGFNFNQSVVDSQGRVINTWADIINRANLGMEVMHERNAHNFPLDLAAIEAPSTNG	367	39314	13	11
285	384	gi|316926274|gb|ADU58127.1|	photosystem II protein D1 [Erodium carvifolium]	MTAILERRESESLWGRFCNWITSTENRLYIGWFGVLMIPTLLTATSVFIIAFIAAPPVDIDGIREPVSGSLLYGNNIISGAIIPTSAAIGLHFYPIWEAASVDEWLYNGGPYELIVLHFLLGVACYMGREWELSFRLGMRPWIAVAYSAPVAAATAVFLIYPIGQGSFSDGMPLGISGTFNFMIVFQAEHNILMHPFHMLGVAGVFGGSLFSAMHGSLVTSSLIRETTENESANEGYRFGQEEETYNIVAAHGYFGRLIFQYASFNNSRSLHFFLAAWPVVGIWFTALGISTMAFNLNGFNFNQSVVDSQGRVINTWADIINRANLGMEVMHERNAHNFPLDLAAVEVPSLNG	367	39370	13	11
285	384	gi|317046153|ref|YP_004072442.1|	PSII 32 kDa protein [Corynocarpus laevigata] >gi|309252870|gb|ADO60290.1| PSII 32 kDa protein [Corynocarpus laevigata]	MTAILERRESESLWGRFCNWITSTENRLYIGWFGVLMIPTLLTATSVFIIAFIAAPPVDIDGIREPVSGSLLYGNNIISGAIIPTSAAIGLHFYPIWEAASVDEWLYNGGPYELIVLHFLLGVACYMGREWELSFRLGMRPWIAVAYSAPVAAATAVFLIYPIGQGSFSDGMPLGISGTFNFMIVFQAEHNILMHPFHMLGVAGVFGGSLFSAMHGSLVTSSLIRETTENESANEGYRFGQEEETYNIVAAHGYFGRLIFQYASFNNSRSLHFFLAAWPVVGIWFTALGISTMAFNLNGFNFNQSVVDSQGRVINTWADIINRANLGMEVMHERNAHNFPLDLAAVEAPSLNG	367	39342	13	11
285	384	gi|32487322|emb|CAE05897.1|	OSJNBa0061C08.4 [Oryza sativa (japonica cultivar-group)] >gi|38347313|emb|CAE02308.2| OSJNBa0042F21.15 [Oryza sativa (japonica cultivar-group)]	MTAILERRESTSLWGRFCNWITSTENRLYIGWFGVLMIPTLLTATSVFIIAFIAAPPVDIDGIREPVSGSLLYGNNIISGAIIPTSAAIGLHFYPIWEAASVDEWLYNGGPYELIVLHFLLGVACYMGREWELSFRLGMRPWIAVAYSAPVAAATAVFLIYPIGQGSFSDGMPLGISGTFNFMIVFQAEHNILMHPFHMLGVAGVFGGSLFSAMHGSLVTSSLIRETTENESANEGYRFGQEEETYNIVAAHGYFGRLIFQYASFNNSRSLHFFLAAWFIR	367	31568	13	11
285	384	gi|32493018|gb|AAP85550.1|	PSII DI protein [Actinidia kolomikta]	MTAILERRESESLWGRFCNWITSTENRLYIGWFGVLMIPTLLTATSVFIIAFIAAPPVDIDGIREPVSGSLLYGNNIISGAIIPTSAAIGLHFYPIWEAASVDEWLYNGGPYELIVLHFLLGVACYMGREWGLSFRLGMRPWIAVAYSAPVAAATAVFLIYPIGQGSFSDGMPLGISGTFNFMIVFQAEHNTLMHPFHMLGVAGVFGGSLFSAMHGSLVTSSLIRETTENESANEGYRFGQEEETYNIVAAHGYFGRLIFQYASFNNSRSLHFFLAAWPVVGIWFTALGISTMAFNLNGFNFNQSVVDSQGRVINTWADIINRANLGMEVMHERNAHNFPLDLAAVEAPSTNG	367	39246	13	11
285	384	gi|32493032|gb|AAP85557.1|	PSII DI protein [Actinidia deliciosa]	MTAILERRESESLWGRFCNWITSTENRLYIGWFGVLMIPTLLTATSVFIIGFIAASSVDIDGIREPVSGSLLYGNNIISGAIIPTSAAIGLHFYPIWEAASVDEWLYNGGPYELIVLQFLLGVACYKGREWELSFRLGMRPWIAVAYSTPVAAATAVFLIYPIGQGSFSDGMPLGISGTFNFMIVFQAEHNILMHPFHMLGVAGVFGGSLFSAMHGSLVTSSLIRETTENESANEGYRFGQEEETYNIVAAHGYFGRLIFQYASFNNSRSLHFFLAAWPVVGIWFTALGISTMAFNLNGFNFNQSVVDSQGRVINTWADIINRANLGMEVMHERNAHNFPLDLAAVEAPSTNG	367	39618	13	11
285	384	gi|32493034|gb|AAP85558.1|	PSII DI protein [Actinidia deliciosa]	MTAILERRESESLWGCFCNWITSTENRLYNGWFGVLMIPTLLTATSVFIIAFIAASSVDIDGIREPVSGSLLYGNNIISGAIIPTSAAIGLHFYPIWEAASVDEWLYNGGPYELMVLHFLLGVACYMCRELVLRFRLGMRPWIAVAYSAPVAAATAVFLIYPIGQGSFSDGMPLGISGTFNFMIVFQAEHYILMHPFHMLGVAGVFGGSLFSAMHGSLVTSSLIRETTENESANEGYRFGQEEETYNIVAAHGYFGRLIFQYASFNNSRSLHFFLAAWPVVGIWFTALGISTMAFNPNGFNFNQSVGDSQGRVINTRADIINRANLGMEVMHERNAHNFPLDLAAVEAPSTNG	367	39363	13	11
285	384	gi|33347415|gb|AAQ15290.1|	photosystem II D1 protein [Amaranthus powellii]	SVFIIAFIAAPPVDIDGIREPVSGSLLYGNNIISGAIIPTSAAIGLHFYPIWEAASVDEWLYNGGPYELIVLHFLLGVACYMGREWELSFRLGMRPWIAVAYSAPVAAATAVFLIYPIGQGSFSDGMPLGISGTFNFMIVFQAEHNILMHPFHMLGVAGVFGGSLFSAMHGSLVTSSLIRETTENESANEGYRFGQEEETYNIVAAHGYFGRLIFQYASFNNSRSLHFFLAAWPVIGIWFTALGISTMAFNLNGFNFNQSVVDSQGRVINTWADIINRANLGMEVMHERNAHNFPL	367	32904	13	11
285	384	gi|33347417|gb|AAQ15291.1|	photosystem II D1 protein [Amaranthus powellii]	SVFIIAFIAAPPVDIDGIREPVSGSLLYGNNIISGAIIPTSAAIGLHFYPIWEAASVDEWLYNGGPYELIVLHFLLGVACYMGREWELSFRLGMRPWIAVAYSAPVAAATAVFLIYPIGQGSFSDGMPLGISGTFNFMIVFQAEHNILMHPFHMLGVAGVFGGSLFSAMHGSLITSSLIRETTENESANEGYRFGQEEETYNIVAAHGYFGRLIFQYASFNNSRSLHFFLAAWPVIGIWFTALGISTMAFNLNGFNFNQSVVDSQGRVINTWADIINRANLGMEVMHERNAHNFPL	367	32918	13	11
285	384	gi|336493|gb|AAA84105.1|	thylakoid membrane protein [Chenopodium album]	SAMHGSLVTSSLIRETTENESANEGYRFGQEEETYNIVAAHGYFGRLIFQYASFNNSRSLHFFLAAWPV	367	8121	13	11
285	384	gi|34398494|gb|AAQ67339.1|	photosystem II thylakoid membrane protein [Glycine max]	MNQDFTMTAILERRESESLWGRFCNWITSTENRLYIGWFGVLMIPTLLTATSVFIIAFIAAPPVDIDGIREPVSGSLLYGNNIISGAIIPTSAAIGLHFYPIWEAASVDEWLYNGGPYELIVLHFLLGVACYMGREWELSFRLGMRPWIAVAYSAPVAAATAVFLIYPIGQGSFSDGMPLGISGTFNFMIVFQAEHNILMHPFHMLGVAGVFGGSLFSAMHGSLVTSSLIRETTENESANEGYRFGQEEETYNIVAAHGYFGRLIFQYASFNNSRSLHFFLAAWPVVGIWFTALGISTMAFNLNGFNFNQSVVDSQGRVINTWADIINRANLGMEVMHERNAHNFPLDLAAIDAPSING	367	40078	13	11
285	384	gi|37498981|gb|AAQ91580.1|	photosystem II reaction center protein D1 [Chlamydomonas sp. CCMP1619]	ISGTFNFMIVFQAEHNILMHPFHMLGVAGVFGGSLFSAMHGSLVTSSLIRETTENESANEGYRFGQEEETYNIVAAHGYFGRLIFQYASFNNSR	367	10799	13	11
285	384	gi|41179021|ref|NP_958377.1|	photosystem II protein D1 [Chlamydomonas reinhardtii] >gi|41179056|ref|NP_958413.1| photosystem II protein D1 [Chlamydomonas reinhardtii] >gi|213517405|gb|ACJ50111.1| photosystem II protein D1 [Chlamydomonas reinhardtii] >gi|28269744|tpg|DAA00922.1|	MTAILERRENSSLWARFCEWITSTENRLYIGWFGVIMIPCLLTATSVFIIAFIAAPPVDIDGIREPVSGSLLYGNNIITGAVIPTSNAIGLHFYPIWEAASLDEWLYNGGPYQLIVCHFLLGVYCYMGREWELSFRLGMRPWIAVAYSAPVAAASAVFLVYPIGQGSFSDGMPLGISGTFNFMIVFQAEHNILMHPFHMLGVAGVFGGSLFSAMHGSLVTSSLIRETTENESANEGYRFGQEEETYNIVAAHGYFGRLIFQYASFNNSRSLHFFLAAWPVIGIWFTALGLSTMAFNLNGFNFNQSVVDSQGRVLNTWADIINRANLGMEVMHERNAHNFPLDLASTNSSSNN	367	39549	13	11
285	384	gi|42795535|gb|AAS46102.1|	photosystem II protein D1 [Oryza sativa Indica Group] >gi|226406|prf||1510376A quinone binding protein >gi|11958|emb|CAA34007.1| PSII 32kDa protein [Oryza sativa Japonica Group] >gi|11466764|ref|NP_039360.1| photosystem II protein D1 [Oryza sativa J	MTAILERRESTSLWGRFCNWITSTENRLYIGWFGVLMIPTLLTATSVFIIAFIAAPPVDIDGIREPVSGSLLYGNNIISGAIIPTSAAIGLHFYPIWEAASVDEWLYNGGPYELIVLHFLLGVACYMGREWELSFRLGMRPWIAVAYSAPVAAATAVFLIYPIGQGSFSDGMPLGISGTFNFMIVFQAEHNILMHPFHMLGVAGVFGGSLFSAMHGSLVTSSLIRETTENESANEGYRFGQEEETYNIVAAHGYFGRLIFQYASFNNSRSLHFFLAAWPVVGIWFTALGISTMAFNLNGFNFNQSVVDSQGRVINTWADIINRANLGMEVMHERNAHNFPLDLAALEVPSLNG	367	39356	13	11
285	384	gi|50250307|emb|CAF28573.1|	PSII 32 kD protein [Nymphaea alba] >gi|75275863|sp|Q6EW68.1|PSBA_NYMAL RecName: Full=Photosystem Q(B) protein; AltName: Full=32 kDa thylakoid membrane protein; AltName: Full=Photosystem II protein D1; Flags: Precursor >gi|50346762|ref|YP_053135.1| p	MTAILERRESTSLWGRFCNWVTSTENRLYIGWFGVLMIPTLLTATSVFIIAFIAAPPVDIDGIREPVSGSLLYGNNIISGAIVPTSAAIGLHFYPIWEASSVDEWLYNGGPYELIVLHFLLGVACYMGREWELSFRLGMRPWIAVAYSAPVAAATAVFLIYPIGQGSFSDGMPLGISGTFNFMIVFQAEHNILMHPFHMLGVAGVFGGSLFSAMHGSLVTSSLIRETTENESANEGYRFGQEEETYNIVAAHGYFGRLIFQYASFNNSRSLHFFLAAWPVVGIWFTALGISTMAFNLNGFNFNQSVVDSQGRVINTWADIINRANLGMEVMHERNAHNFPLDLAAVEAPSTNG	367	39290	13	11
285	384	gi|51234109|gb|AAT97977.1|	photosystem II protein D1 [Camellia sinensis var. sinensis] >gi|194132091|gb|ACF33345.1| photosystem II protein D1 [Gonystylus bancanus] >gi|11497504|ref|NP_054912.1| photosystem II protein D1 [Spinacia oleracea] >gi|61230127|sp|P69562.2|PSBA_NICPL	MTAILERRESESLWGRFCNWITSTENRLYIGWFGVLMIPTLLTATSVFIIAFIAAPPVDIDGIREPVSGSLLYGNNIISGAIIPTSAAIGLHFYPIWEAASVDEWLYNGGPYELIVLHFLLGVACYMGREWELSFRLGMRPWIAVAYSAPVAAATAVFLIYPIGQGSFSDGMPLGISGTFNFMIVFQAEHNILMHPFHMLGVAGVFGGSLFSAMHGSLVTSSLIRETTENESANEGYRFGQEEETYNIVAAHGYFGRLIFQYASFNNSRSLHFFLAAWPVVGIWFTALGISTMAFNLNGFNFNQSVVDSQGRVINTWADIINRANLGMEVMHERNAHNFPLDLAAIEAPSTNG	367	39344	13	11
285	384	gi|58802761|gb|AAW82481.1|	photosystem II protein D1 [Phalaenopsis aphrodite subsp. formosana] >gi|122213451|sp|Q3BAR4.1|PSBA_PHAAO RecName: Full=Photosystem Q(B) protein; AltName: Full=32 kDa thylakoid membrane protein; AltName: Full=Photosystem II protein D1; Flags: Precurs	MTAILERRESTSLWGRFCNWITSTENRLYIGWFGVLMIPTLLTATSVFIIAFIAAPPVDIDGIREPVSGSLLYGNNIISGAIIPTSAAIGLHFYPIWEAASVDEWLYNGGPYELIVLHFLLGVACYMGREWELSFRLGMRPWIAVAYSAPVAAATAVFLIYPIGQGSFSDGMPLGISGTFNFMIVFQAEHNILMHPFHMLGVAGVFGGSLFSAMHGSLVTSSLIRETTENESANEGYRFGQEEETYNIVAAHGYFGRLIFQYASFNNSRSLHFFLAAWPVVGIWFTALGISTMAFNLNGFNFNQSVVDSQGRVINTWADIINRANLGMEVMHERNAHNFPLDLASVEAPSING	367	39330	13	11
285	384	gi|60460789|gb|AAX21009.1|	photosystem II protein D1 [Eucalyptus globulus subsp. globulus] >gi|190360077|sp|A4GYN9.1|PSBA_POPTR RecName: Full=Photosystem Q(B) protein; AltName: Full=32 kDa thylakoid membrane protein; AltName: Full=Photosystem II protein D1; Flags: Precursor >	MTAILERRESESLWGRFCNWITSTENRLYIGWFGVLMIPTLLTATSVFIIAFIAAPPVDIDGIREPVSGSLLYGNNIISGAIIPTSAAIGLHFYPIWEAASVDEWLYNGGPYELIVLHFLLGVACYMGREWELSFRLGMRPWIAVAYSAPVAAATAVFLIYPIGQGSFSDGMPLGISGTFNFMIVFQAEHNILMHPFHMLGVAGVFGGSLFSAMHGSLVTSSLIRETTENESANEGYRFGQEEETYNIVAAHGYFGRLIFQYASFNNSRSLHFFLAAWPVVGIWFTALGISTMAFNLNGFNFNQSVVDSQGRVINTWADIINRANLGMEVMHERNAHNFPLDLAAVEVPSTNG	367	39358	13	11
285	384	gi|68164783|ref|YP_247579.1|	photosystem II protein D1 [Cucumis sativus] >gi|67511378|emb|CAJ00738.1| PSII 32 kDa protein [Cucumis sativus]	MTAILERRESESLWGRFCNWITSTENRLYIGWFGVLMIPTLLTATSVFIIAFIAAPPVDIDGIREPVSGSLLYGNNIISGAIIPTSAAIGLHFYPIWEAASVDEWLYNGGPYELIVLHFLLGVACYMGREWELSFRLGMRPWIAVAYSAPVAAATAVFLIYPIGQGSFSDGMPLGISGTFNFMIVFQAEHNILMHPFHMLGVAGVFGGSLFSAMHGSLVTSKLIRETTENESANEGYRFGQEEETYNIVAAHGYFGRLIFQYASFNNSRSLHFFLAAWPVVGIWSTALGISTMAFNLNGFNFNQSVVDSQGRVINTWADIINRANLGMEVMHERNAHNFPLDLAAVEVPSING	367	39655	13	11
285	384	gi|69217622|gb|AAZ04087.1|	photosystem II protein D1 [Acorus americanus] >gi|122217427|sp|Q3V554.1|PSBA_ACOCL RecName: Full=Photosystem Q(B) protein; AltName: Full=32 kDa thylakoid membrane protein; AltName: Full=Photosystem II protein D1; Flags: Precursor >gi|160369833|gb|AB	MTAILERRESTSLWGRFCNWITSTENRLYIGWFGVLMIPTLLTATSVFIIAFIAAPPVDIDGIREPVSGSLLYGNNIISGAIIPTSAAIGLHFYPIWEAASVDEWLYNGGPYELIVLHFLLGVACYMGREWELSFRLGMRPWIAVAYSAPVAAATAVFLIYPIGQGSFSDGMPLGISGTFNFMIVFQAEHNILMHPFHMLGVAGVFGGSLFSAMHGSLVTSSLIRETTENESANEGYRFGQEEETYNIVAAHGYFGRLIFQYASFNNSRSLHFFLAAWPVVGIWFTALGISTMAFNLNGFNFNQSVVDSQGRVINTWADIINRANLGMEVMHERNAHNFPLDLASVEAPSTNG	367	39318	13	11
285	384	gi|69217632|gb|AAZ04092.1|	photosystem II protein D1 [Yucca schidigera]	MTAILERRESTSLWGRFCNWITSTENRLYIGWFGVLMIPTLLTATSVFIIAFIAAPPVDIDGIREPVSGSLLYGNNIISGAIIPTSAAIGLHFYPIWEAASVDEWLYNGGPYELIVLHFLLGVACYMGREWELSFRLGMRPWIAVAYSAPVAAATAVFLIYPIGQGSFSDGMPLGISGTFNFMIVFQAEHNILMHPFHMLGVAGVFGGSLFSAMHGSLVTSSLIRETTENESANEGYRFGQEEETYNIVAAHGYFGRLIFQYASFNNSRSLHFFLAAWPVVGIWFTALGISTMAFNLNGFNFNQSVVDSQGRVINTWADIINRANLGMEVMHERNAHNFPLDLAAVEVPSTNG	367	39330	13	11
285	384	gi|8131597|dbj|BAA96363.1|	photosystem II Qb protein [Bruguiera gymnorhiza]	ETTENESANEGYRFGQEEETYNIVAAHGYFGRLIFQYASFNNSRSLHFFLAAWPVVGIWFTVLGISTMAFNLNGFNFNQSVVDSQGRVINTWADIINRANLGMEVMHERNALNFPLDLAAVEAPSING	367	14651	13	11
285	384	gi|82395420|gb|ABB72137.1|	inhibitor-susceptible PSII D1 protein [Senecio vulgaris]	SLWGRFCNWITSTENRLYIGWFGVLMIPTLLTATSVFIIAFIAAPPVDIDGIREPVSGSLLYGNNIISGAIIPTSAAIGLHFYPIWEAASVDEWLYNGGPYELIVLHFLLGVACYMGREWELSFRLGMRPWIAVAYSAPVAAATAVFLIYPIGQGSFSDGMPLGISGTFNFMIVFQAEHNILMHPFHMLGVAGVFGGSLFSAMHGSLVTSSLIRETTENESANEGYRFGQEEETYNIVAAHGYFGRLIFQYASFNNSRSLHFFLAAWPVVGIWFTALGISTMAFNLNGFNFNQSVVDSQGRVINTWADIINRANLGMEVMHERNAHNFP	367	36775	13	11
285	384	gi|88696752|gb|ABD48477.1|	PSII 32 kD protein [Lemna minor] >gi|190360065|sp|A9L976.1|PSBA_LEMMI RecName: Full=Photosystem Q(B) protein; AltName: Full=32 kDa thylakoid membrane protein; AltName: Full=Photosystem II protein D1; Flags: Precursor >gi|161784174|ref|YP_001595488.1	MTAILERRESTSLWGRFCNWVTSTENRLYIGWFGVLMIPTLLTATSVFIIAFIAAPPVDIDGIREPVSGSLLYGNNIISGAVIPTSAAIGLHFYPIWEAASVDEWLYNGGPYELIVLHFLLGVACYMGREWELSFRLGMRPWIAVAYSAPVAAATAVFLIYPIGQGSFSDGMPLGISGTFNFMIVFQAEHNILMHPFHMLGVAGVFGGSLFSAMHGSLVTSSLIRETTENESANEGYRFGQEEETYNIVAAHGYFGRLIFQYASFNNSRSLHFFLAAWPVVGIWFTALGISTMAFNLNGFNFNQSVVDSQGRVINTWADIINRANLGMEVMHERNAHNFPLDLAAVEAPSTIG	367	39273	13	11
285	384	gi|984735|emb|CAA56907.1|	photosystem II D1 protein [Vigna unguiculata] >gi|2500082|sp|Q33282.1|PSBA_VIGUN RecName: Full=Photosystem Q(B) protein; AltName: Full=32 kDa thylakoid membrane protein; AltName: Full=Photosystem II protein D1; Flags: Precursor	MTAILERRESESLWGRFCNWITSTENRLYIGWFGVLMIPTLLTATSVFIIAFIAAPPVDIDGIREPVSGSLLYGNNIISGAIIPTSAAIGLHFYPIWEAASVDEWLYNGGPYELIVLHFLLGVACYMGREWELSFRLGMRPWIAVAYSAPVAAATAVFLIYPIGQGSFSDGMPLGISGTFNFMIVFQAEHNILMHPFHMLGVAGVFGSSLFSAMHGSLVTSSLIRETTENESANEGYRFGQEEETYNIVAAHGYFGRLIFQYASFNNSRSLHFFLAAWPVVGIWFTALGISTMAFNLNGFNFNQSVVDSQGRVINTWADIINRANLGMEVMHERNAHNFPLDLAAMEAPSVNG	367	39390	13	11
287	386	gi|171259300|ref|YP_654212.2|	ATP synthase CF1 alpha chain [Oryza sativa Indica Group] >gi|68565034|sp|Q6ENH7.1|ATPA_ORYNI RecName: Full=ATP synthase subunit alpha, chloroplastic; AltName: Full=ATP synthase F1 sector subunit alpha; AltName: Full=F-ATPase subunit alpha >gi|11979|	MATLRVDEIHKILRERIEQYNRKVGIENIGRVVQVGDGIARIIGLGEIMSGELVEFAEGTRGIALNLESKNVGIVLMGDGLMIQEGSFVKATGRIAQIPVSEAYLGRVINALAKPIDGRGEIVASESRLIESPAPGIISRRSVYEPLQTGLIAIDSMIPIGRGQRELIIGDRQTGKTAVATDTILNQKGQDVICVYVAIGQRASSVAQVVTTFHEEGAMEYTIVVAEMADSPATLQYLAPYTGAALAEYFMYRERHTLIIYDDLSKQAQAYRQMSLLLRRPPGREAYPGDVFYLHSRLLERAAKLNSLLGEGSMTALPIVETQSGDVSAYIPTNVISITDGQIFLSADLFNAGIRPAINVGISVSRVGSAAQIKAMKQVAGKSKLELAQFAELQAFAQF…	365	62684	20	2
287	386	gi|31433181|gb|AAP54723.1|	ATP synthase alpha chain, putative, expressed [Oryza sativa Japonica Group] >gi|20146763|gb|AAM12499.1|AC074232_26 ATPase alpha subunit [Oryza sativa Japonica Group]	MATLRVDEIHKILRERIEQYNRKVGIENIGRVVQVGDGIARIIGLGEIMSGELVEFAEGTRGIALNLESKNVGIVLMGDGLMIQEGSFVKATGRIAQIPVSEAYLGRVINALAKPIDGRGEIVASESRLIESPAPGIISRRSVYEPLQTGLIAIDSMIPIGRGQRELIIGDRQTGKTAVATDTILNQKGQDVICVYVAIGQRASSVAQVVTTFHEEGAMEYTIVVAEMADSPATLQYLAPYTGAALAEYFMYRERHTLIIYDDLSKQAQAYRQMSLLLRRPPGREAYPGDVFYLHSRLLERAAKLNSLLGEGSMTALPIVETQSGDVSAYIPTNVISITDGQIFLSADLFNAGIRPAINVGISVSRVGSAAQIKAMKQVAGKSKLELAQFAELQAFAQF…	365	62199	20	2	---		0.695	*	---		---		---		1.607	*	---
287	386	gi|42795485|gb|AAS46052.1|	ATP synthase CF1 alpha chain [Oryza sativa Indica Group] >gi|42795552|gb|AAS46118.1| ATP synthase CF1 alpha chain [Oryza sativa Japonica Group] >gi|42795616|gb|AAS46181.1| ATP synthase CF1 alpha chain [Oryza sativa Japonica Group]	MNFYFPLEFRHYFSPCFRKKNSKETLMATLRVDEIHKILRERIEQYNRKVGIENIGRVVQVGDGIARIIGLGEIMSGELVEFAEGTRGIALNLESKNVGIVLMGDGLMIQEGSFVKATGRIAQIPVSEAYLGRVINALAKPIDGRGEIVASESRLIESPAPGIISRRSVYEPLQTGLIAIDSMIPIGRGQRELIIGDRQTGKTAVATDTILNQKGQDVICVYVAIGQRASSVAQVVTTFHEEGAMEYTIVVAEMADSPATLQYLAPYTGAALAEYFMYRERHTLIIYDDLSKQAQAYRQMSLLLRRPPGREAYPGDVFYLHSRLLERAAKLNSLLGEGSMTALPIVETQSGDVSAYIPTNVISITDGQIFLSADLFNAGIRPAINVGISVSRVGSAAQI…	365	66964	20	2
293	394	gi|223533733|gb|EEF35467.1|	glutamate synthase, putative [Ricinus communis] >gi|255571945|ref|XP_002526914.1| glutamate synthase, putative [Ricinus communis]	MALQTTASSSASSSQLLLNSASSSSIAKAPCSVLAYTNKFNSNNHFFVDFVGLYCQSKRRSRRIGVSSSSCDSNSSIQRNSFSRFVNSTVRSQSLPLPDLKPKVANLDDIISERGACGVGFIANLENKASHEVVKDALTALGCMEHRGGCGADNDSGDGSGLMTSIPWDLFNNWADKQGIASFDKLHTGVGMVFLPKDDNLMKEAKQVVENVFKQEGLEVLGWRPVPVNKSIVGFYAKETMPNIQQVFVRIVKDESVDDIEREFYICRKLIERAATSERWGNELYICSLSNQTIVYKGMLRSEVLGLFYSDLQSDLYKSPFAIYHRRYSTNTSPRWPLAQPMRLLGHNGEINTIQGNLNWMQSRESSLKSPVWRGRENEIRPFGNPKASDSANLDSAAE…	356	205992	13	1	---		---		---		---		---		---		---
307	409	gi|187453117|emb|CAP72489.1|	catharanthus roseus peroxidase 2a [Catharanthus roseus] >gi|187453120|emb|CAP72491.1| peroxidase 2a precursor [Catharanthus roseus]	MALIAFSSSTSLLLICSLLLVSTHFNFHIEAQTTPPIVSGLSFAFYNSTCPDLESIIRNRLREVFQNDIEQAAGLLRLHFHDCFVQGCDGSVLLVGSASGPGEQDAPPNLSLRQEAFRIINDLRRRVHSRCGRIVSCSDILALAARDSVVLSGGPEYDVPLGRRDGLNFATQNETLNNLPPPSSNTSELLTSLATKNFNATDVVALSGGHTIGVGHCVSFEERLYPTQDPTMDQTFARNLRLTCPALNTTNTTVLDIRSPNRFDNRYYVDLMNRQGLFTSDQDLYTDRRTRGIVTDFAVNQTLFFEKFVYAMIKMGQLNVLTGNQGEIRANCSVRNAASGRSSSLVSVVEDAAEVGLSMF	336	41248	12	2	29.913	*	4.062	*	0.763		---		---		4.495	*	---
307	409	gi|187453122|emb|CAP72492.1|	peroxidase 2b precursor [Catharanthus roseus] >gi|187453118|emb|CAP72490.1| catharanthus roseus peroxidase 2b [Catharanthus roseus]	MVFMSSFSSSSSSTSLLLFLISSLLISTHFNVHIEAQTTPPIVSGLSFTFYDSSCPDLESIIRNRLRRVFRNDIGQAAGLLRLHFHDCFVQGCDGSVLLVGSASGPGEQDAPPNLSLRQEAFRIINDLRRRVHSRCGRIVSCSDILALAARDSVVLSGGPEYDVPLGRRDGLNFATQNETLNNLPPPSSNTSELLTSLATKNFNATDVVALSGGHTIGVGHCVSFEERLYPTQDPTMDQTFARNLRLTCPALNTTNTTVLDIRSPNRFDNRYYVDLMNRQGLFTSDQDLYTDRRTRGIVTDFAVNQTLFFEKFVYAMIKMGQLNVLTGNQGEIRANCSVRNAASGRSSSLVSVVEDAAEVGLSMF	336	41732	12	2
309	411	gi|114804260|ref|YP_762256.1|	PSII D2 protein [Morus indica] >gi|78100312|gb|ABB20953.1| PSII D2 protein [Morus indica] >gi|122166810|sp|Q09X22.1|PSBD_MORIN RecName: Full=Photosystem II D2 protein; Short=PSII D2 protein; AltName: Full=Photosystem Q(A) protein	MTIALGKFTKDENDLFDIMDDWLRRDRFVFVGWSGLLLFPCAYFALGGWFTGTTFVTSWYTHGLASSYLEGCNFLTAAVSTPANSLAHSLLLLWGPEAQGDFTRWCQLGGLWTFVALHGAFALIGFMLRQFELARSVQLRPYNAIAFSAPIAVFVSVFLIYPLGQSGWFFAPSFGVAAIFRFILFFQGFHNWTLNPFHMMGVAGVLGAALLCAIHGATVENTLFEDGDGANTFRAFNPTQAEETYSMVTANRFWSQIFGVAFSNKRWLHFFMLFVPVTGLWMSALGVVGLALNLRAYDFVSQEIRAAEDPEFETFYTKNILLNEGIRAWMAAQDQPHENLIFPEEVLPRGNAL	334	41301	11	5
309	411	gi|122202496|sp|Q2PMT8.1|PSBD_SOYBN	RecName: Full=Photosystem II D2 protein; Short=PSII D2 protein; AltName: Full=Photosystem Q(A) protein >gi|83595739|gb|ABC25120.1| photosystem II protein D2 [Glycine max] >gi|91214138|ref|YP_538760.1| photosystem II protein D2 [Glycine max]	MTIALGKFTKDENDLFDIMDDWLRRDRFVFVGWSGLLLFPCAYFALGGWFTGTTFVTSWYTHGLASSYLEGCNFLTAAVSTPANSLAHSLLLLWGPEAQGDFTRWCQLGGLWTFVALHGAFALIGFMLRQFELARSVQLRPYNAIAFSGPIAVFVSVFLIYPLGQSGWFFAPSFGVAAIFRFILFFQGFHNWTLNPFHMMGVAGVLGAALLCAIHGATVENTLFEDGDGANTFRAFNPTQAEETYSMVTANRFWSQIFGVAFSNKRWLHFFMLFVPVTGLWMSALGVVGLALNLRAYDFVSQEIRAAEDPEFETFYTKNILLNEGIRAWMAAQDQPHENLIFPEEVLPRGNAL	334	41287	11	5
309	411	gi|134093193|ref|YP_001109495.1|	photosystem II protein D2 [Populus trichocarpa] >gi|108802638|ref|YP_636294.1| photosystem II protein D2 [Eucalyptus globulus subsp. globulus] >gi|23821995|sp|Q9BBT0.1|PSBD_LOTJA RecName: Full=Photosystem II D2 protein; Short=PSII D2 protein; AltNam	MTIALGKFTKDENDLFDIMDDWLRRDRFVFVGWSGLLLFPCAYFALGGWFTGTTFVTSWYTHGLASSYLEGCNFLTAAVSTPANSLAHSLLLLWGPEAQGDFTRWCQLGGLWTFVALHGAFGLIGFMLRQFELARSVQLRPYNAIAFSGPIAVFVSVFLIYPLGQSGWFFAPSFGVAAIFRFILFFQGFHNWTLNPFHMMGVAGVLGAALLCAIHGATVENTLFEDGDGANTFRAFNPTQAEETYSMVTANRFWSQIFGVAFSNKRWLHFFMLFVPVTGLWMSALGVVGLALNLRAYDFVSQEIRAAEDPEFETFYTKNILLNEGIRAWMAAQDQPHENLIFPEEVLPRGNAL	334	41273	11	5
309	411	gi|170784764|ref|YP_001718680.1|	photosystem II protein D2 [Trachelium caeruleum] >gi|157267512|gb|ABV26505.1| photosystem II protein D2 [Trachelium caeruleum] >gi|156598875|gb|ABU85690.1| photosystem II protein D2 [Trachelium caeruleum]	MTIALGKFTKDENDLFDIMDDWLRRDRFVFVGWSGLLLFPCAYFALGGWFTGTTFVTSWYTHGLASSYLEGCNFLTAAVSTPANSLSHSLLLLWGPEAQGDFTRWCQLGGLWTFVALHGAFGLIGFMLRQFELARSVQLRPYNAIAFSGPIAVFVSVFLIYPLGQSGWFFAPSFGVAAIFRFILFFQGFHNWTLNPFHMMGVAGVLGAALLCAIHGATVENTLFEDGDGANTFRAFNPTQAEETYSMVTANRFWSQIFGVAFSNKRWLHFFMLFVPVTGLWMSALGVVGLALNLRAYDFVSQEIRAAEDPEFETFYTKNILLNEGIRAWMAAQDQPHENLIFPEEVLPRGNAL	334	41289	11	5
309	411	gi|197132036|gb|ACH47536.1|	photosystem II protein D2 [Erodium chrysanthum]	MTIALGKFTKDENDLFDIMDDWLRRDRFVFVGWSGLLLFPCAYFALGGWFTGTTFVTSWYTHGLASSYLEGCNFLTAAVSTPANSLAHSLLLLWGPEAQGDLTRWCQLGGLWTFVALHGAFGLIGFMLRQFELARSVQLRPYNAIAFSGPIAVFVSVFLIYPLGQSGWFFAPSFGVAAIFRFILFFQGFHNWTLNPFHMMGVAGVLGAALLCAIHGATVENTLFEDGDGANTFRAFNPTQAEETYSMVTANRFWSQIFGVAFSNKRWLHFFMLFVPVTGLWMSALGVVGLALNLRAYDFVSQEIRAAEDPEFETFYTKNILLNEGIRAWMAAQDQPHENLIFPEEVLPRGNAL	334	41239	11	5
309	411	gi|20068326|emb|CAC88039.1|	psII D2 protein [Atropa belladonna] >gi|75248030|sp|Q8S8X8.1|PSBD_ATRBE RecName: Full=Photosystem II D2 protein; Short=PSII D2 protein; AltName: Full=Photosystem Q(A) protein >gi|28261712|ref|NP_783227.1| photosystem II protein D2 [Atropa belladonna	MTIALDKFTKDENDLFDIMDDWLRRDRFVFVGWSGLLLFPCAYFAVGGWFTGTTFVTSWYTHGLASSYLEGCNFLTAAVSTPANSLAHSLLLLWGPEAQGDFTRWCQLGGLWTFVALHGAFGLIGFMLRQFELARSVQLRPYNAIAFSGPIAVFVSVFLIYPLGQSGWFFAPSFGVAAIFRFILFFQGFHNWTLNPFHMMGVAGVLGAALLCAIHGATVENTLFEDGDGANTFRAFNPTQAEETYSMVTANRFWSQIFGVAFSNKRWLHFFMLFVPVTGLWMSALGVVGLALNLRAYDFVSQEIRAAEDPEFETFYTKNILLNEGIRAWMAAQDQPHENLIFPEEVLPRGNAL	334	41317	11	5
309	411	gi|221222626|sp|B1A930.1|PSBD_CARPA	RecName: Full=Photosystem II D2 protein; Short=PSII D2 protein; AltName: Full=Photosystem Q(A) protein >gi|167391800|ref|YP_001671678.1| photosystem II protein D2 [Carica papaya] >gi|166344127|gb|ABY86777.1| photosystem II protein D2 [Carica papaya]	MTIALGKFTKDENDLFDIMDDWLRRDRFVFVGWSGLLLFPCAYFAIGGWFTGTTFVTSWYTHGLASSYLEGCNFLTAAVSTPANSLAHSLLLLWGPEAQGDFTRWCQLGGLWTFVALHGAFGLIGFMLRQFELARSVQLRPYNAIAFSGPIAVFVSVFLIYPLGQSGWFFAPSFGVAAIFRFILFFQGFHNWTLNPFHMMGVAGVLGAALLCAIHGATVENTLFEDGDGANTFRAFNPTQAEETYSMVTANRFWSQIFGVAFSNKRWLHFFMLFVPVTGLWMSALGVVGLALNLRAYDFVSQEIRAAEDPEFETFYTKNILLNEGIRAWMAAQDQPHENLIFPEEVLPRGNAL	334	41273	11	5
309	411	gi|225284|prf||1211235V	photosystem II D2 protein >gi|94502486|ref|YP_588112.1| photosystem II protein D2 [Helianthus annuus] >gi|669100|emb|CAA58960.1| photosystem I subunit [Antirrhinum majus] >gi|11465949|ref|NP_054491.1| photosystem II protein D2 [Nicotiana tabacum] >g	MTIALGKFTKDENDLFDIMDDWLRRDRFVFVGWSGLLLFPCAYFAVGGWFTGTTFVTSWYTHGLASSYLEGCNFLTAAVSTPANSLAHSLLLLWGPEAQGDFTRWCQLGGLWTFVALHGAFGLIGFMLRQFELARSVQLRPYNAIAFSGPIAVFVSVFLIYPLGQSGWFFAPSFGVAAIFRFILFFQGFHNWTLNPFHMMGVAGVLGAALLCAIHGATVENTLFEDGDGANTFRAFNPTQAEETYSMVTANRFWSQIFGVAFSNKRWLHFFMLFVPVTGLWMSALGVVGLALNLRAYDFVSQEIRAAEDPEFETFYTKNILLNEGIRAWMAAQDQPHENLIFPEEVLPRGNAL	334	41259	11	5	0.034	*	0.455	*	0.726		0.048		3.77	*	1.66	*	0.278	*
309	411	gi|281428682|gb|ADA69921.1|	PSII D2 protein [Olea europaea] >gi|283794963|ref|YP_003359354.1| PSII D2 protein [Olea europaea]	MALGKFTKDENDLFDIMDDWLRRDRFVFVGWSGLLLFPCAYFALGGWFTGTTFVTSWYTHGLASSYLEGCNFLTAAVSTPANSLAHSLLLLWGPEAQGDFTRWCQLGGLWTFVALHGAFGLIGFMLRQFELARSVQLRPYNAIAFSAPIAVFVSVFLIYPLGQSGWFFAPSFGVAAIFRFILFFQGFHNWTLNPFHMMGVAGVLGAALLCAIHGATVENTLFEDGDGANTFRAFNPTQAEETYSMVTANRFWSQIFGVAFSNKRWLHFFMLFVPVTGLWMSALGVVGLALNLRAYDFVSQEIRAAEDPEFETFYTKNIILNEGIRAWMAAQDQPHENLIFPEEVLPRGNAL	334	41073	11	5
309	411	gi|290488368|gb|ADD30568.1|	photosystem II protein D2 [Aucuba japonica]	MTIALGKFTKDENDLFDIMDDWLRRDRFVFVGWSGLLLFPCAYFALGGWFTGTTFVTSWYTHGLASSYLEGCNFLTAAVSTPANSLAHSLLLLWGPEAQGDFTRWCQLGGLWIFVALHGAFGLIGFMLRQFELARSVQLRPYNAIAFSAPIAVFVSVFLIYPLGQSGWFFAPSFGVAAIFRFILFFQGFHNWTLNPFHMMGVAGVLGAALLCAIHGATVENTLFEDGDGANTFRAFNPTQAEETYSMVTANRFWSQIFGVAFSNKRWLHFFMLFVPVTGLWMSALGVVGLALNLRAYDFVSQEIRAAEDPEFETFYTKNILLNEGIRAWMAAQDQPHENLIFPEEVLPRGNAL	334	41299	11	5
309	411	gi|290488370|gb|ADD30569.1|	photosystem II protein D2 [Dillenia indica]	MTIALGKFTKDENDLFDIMDDWLRRDRFVFVGWSGLLLFPCAYFALGGWFTGTTFVTSWYTHGLASSYLEGCNFLTAAVSTPANSLAHSLLLLWGPEAQGDFTRWCQLGGLWTFIALHGAFALIGFMLRQFELARSVQLRPYNAIAFSGPIAVFVSVFLIYPLGQSGWFFAPSFGVAAIFRFILFFQGFHNWTLNPFHMMGVAGVLGAALLCAIHGATVENTLFEDGDGANTFRAFNPTQAEETYSMVTANRFWSQIFGVAFSNKRWLHFFMLFVPVTGLWMSALGVVGLALNLRAYDFVSQEIRAAEDPEFETFYTKNILLNEGIRAWMAAQDQPHENLIFPEEVLPRGNAL	334	41301	11	5
309	411	gi|290488378|gb|ADD30573.1|	photosystem II protein D2 [Meliosma aff. cuneifolia Moore 333] >gi|149390535|ref|YP_001294179.1| photosystem II protein D2 [Buxus microphylla] >gi|221222624|sp|A6MM31.1|PSBD_BUXMI RecName: Full=Photosystem II D2 protein; Short=PSII D2 protein; AltNa	MTIALGRFTKDENDLFDIMDDWLRRDRFVFVGWSGLLLFPCAYFALGGWFTGTTFVTSWYTHGLASSYLEGCNFLTAAVSTPANSLAHSLLLLWGPEAQGDFTRWCQLGGLWTFVALHGAFGLIGFMLRQFELARSVQLRPYNAIAFSAPIAVFVSVFLIYPLGQSGWFFAPSFGVAAIFRFILFFQGFHNWTLNPFHMMGVAGVLGAALLCAIHGATVENTLFEDGDGANTFRAFNPTQAEETYSMVTANRFWSQIFGVAFSNKRWLHFFMLFVPVTGLWMSALGVVGLALNLRAYDFVSQEIRAAEDPEFETFYTKNILLNEGIRAWMAAQDQPHENLIFPEEVLPRGNAL	334	41011	11	5
309	411	gi|290488386|gb|ADD30577.1|	photosystem II protein D2 [Rhododendron simsii]	MTIALGKFTKDENDLFDIMDDWLRRDRFVFVGWSGLLLFPCAYFALGGWFTGTTFVTSWYTHGLASSYLEGCNFLTAAVSTPANSLAHSLLLLWGPEAQGDFTRWCQLGGLWTFVALHGAFGLIGFMLRQFELARSVQLRPYNAIAFSGPIAVFVSVFLIYPLGQSGWFFAPSFGVSAIFRFILFFQGFHNWTLNPFHMMGVAGVLGAALLCAIHGATVENTLFEDGDGANTFRAFNPTQAEETYSMVTANRFWSQIFGVAFSNKRWLHFFMLFVPVTGLWMSALGVVGLALNLRAYDFVSQEIRAAEDPEFETFYTKNILLNEGIRAWMAAQDQPHENLIFPEEVLPRGNAL	334	41289	11	5
309	411	gi|290488388|gb|ADD30578.1|	photosystem II protein D2 [Ximenia americana]	MTIALGKFTKDENDLFDIMDDWLRRDRFVFVGWSGLLLFPCAYFALGGWFTGTTFVTSWYTHGLASSYLEGCNFLTAAVSTPANSLAHSLLLLWGPEAQGDFTRWCQFGGLWTFVALHGAFGLIGFMLRQFELARSVQLRPYNAIAFSAPIAVFVSVFLIYPLGQSGWFFAPSFGVAAIFRFILFFQGFHNWTLNPFHMMGVAGVLGAALLCAIHGATVENTLFEDGDGANTFRAFNPTQAEETYSMVTANRFWSQIFGVAFSNKRWLHFFMLFVPVTGLWMSALGVVGLALNLRAYDFVSQEIRAAEDPEFETFYTKNILLNEGIRAWMAAQDQPHENLIFPEEVLPRGNAL	334	41321	11	5
309	411	gi|290488392|gb|ADD30580.1|	photosystem II protein D2 [Bulnesia arborea]	MTIALGKFTKDENDLFDIMDDWLRRDRFVFVGWSGLLLFPCAYFALGGWFTGTTFVTSWYTHGLASSYLEGCNFLTAAVSTPANSLAHSLLLLWGPEAQGDFTRWCQLGGLWTFVALHGAFGLIGFMLRQFELARSVQLRPYNAISFSAPIAVFVSVFLIYPLGQSGWFFAPSFGVAAIFRFILFFQGFHNWTLNPFHMMGVAGVLGAALLCAIHGATVENTLFEDGDGANTFRAFNPTQAEETYSMVTANRFWSQIFGVAFSNKRWLHFFMLFVPVTGLWMSALGVVGLALNLRAYDFVSQEIRAAEDPEFETFYTKNILLNEGIRAWMAAQDQPHENLIFPEEVLPRGNAL	334	41303	11	5
309	411	gi|290488410|gb|ADD30589.1|	photosystem II protein D2 [Quercus nigra] >gi|290488374|gb|ADD30571.1| photosystem II protein D2 [Ilex cornuta] >gi|309321515|gb|ADO65055.1| photosystem II protein D2 [Castanea mollissima] >gi|290488390|gb|ADD30579.1| photosystem II protein D2 [Berb	MTIALGKFTKDENDLFDIMDDWLRRDRFVFVGWSGLLLFPCAYFALGGWFTGTTFVTSWYTHGLASSYLEGCNFLTAAVSTPANSLAHSLLLLWGPEAQGDFTRWCQLGGLWTFVALHGAFGLIGFMLRQFELARSVQLRPYNAIAFSAPIAVFVSVFLIYPLGQSGWFFAPSFGVAAIFRFILFFQGFHNWTLNPFHMMGVAGVLGAALLCAIHGATVENTLFEDGDGANTFRAFNPTQAEETYSMVTANRFWSQIFGVAFSNKRWLHFFMLFVPVTGLWMSALGVVGLALNLRAYDFVSQEIRAAEDPEFETFYTKNILLNEGIRAWMAAQDQPHENLIFPEEVLPRGNAL	334	41287	11	5
309	411	gi|291059248|gb|ADD72084.1|	photosystem II protein D2 [Olea europaea]	MTIALGKFTKDENDLFDIMDDWLRRDRFVFVGWSGLLLFPCAYFALGGWFTGTTFVTSWYTHGLASSYLEGCNFLTAAVSTPANSLAHSLLLLWGPEAQGDFTRWCQLGGLWTFVALHGAFGLIGFMLRQFELARSVQLRPYNAIAFSAPIAVFVSVFLIYPLGQSGWFFAPSFGVAAIFRFILFFQGFHNWTLNPFHMMGVAGVLGAALLCAIHGATVENTLFEDGDGANTFRAFNPTQAEETYSMVTANRFWSQIFGVAFSNKRWLHFFMLFVPVTGLWMSALGVVGLALNLRAYDFVSQEIRAAEDPEFETFYTKNIILNEGIRAWMAAQDQPHENLIFPEEVLPRGNAL	334	41287	11	5
309	411	gi|4581044|gb|AAD24582.1|AF134324_1	Qa-binding protein PsbD [Populus deltoides] >gi|18203605|sp|Q9XQA8.1|PSBD_POPDE RecName: Full=Photosystem II D2 protein; Short=PSII D2 protein; AltName: Full=Photosystem Q(A) protein	MTIALGKFTKDENDLFDIMDDWLRRDRFVFVGWSGLLVFPCAYFALGGWFTGTTFVTSWYTHGWASSYLEGCNFLTAAVSTPANSLAHSLLLLWGPEAQGDFTRWCQLGGFWTFVALHGAFGLIGFMLRQFELARSVQLRPYNAIAFSAPIAVFVSVFLIYPLGQSGWFFAPSFGVAAIFRFILFFQGFHNWTLNPFHMMGVAGVLGAALLCAIHGATVENTLFEDGDGANTFRAFNPTQAEETYSMVTANRFWSQIFGVAFSNKRWLHFFMLFVPVTGLWMSALGVVGLALNLRAYDFVSQEIRAAEDPEFETFYTKNILLNEGIRAWMAAQDQPHENLIFPEEVLPRGNAL	334	41380	11	5
309	411	gi|75317322|sp|Q4VZN8.1|PSBD_CUCSA	RecName: Full=Photosystem II D2 protein; Short=PSII D2 protein; AltName: Full=Photosystem Q(A) protein >gi|67511393|emb|CAJ00753.1| photosystem II protein D2 [Cucumis sativus] >gi|74027096|gb|AAZ94646.1| PSII D2 protein [Cucumis sativus] >gi|1154327	MTIAVGKFTKDENDLFDIMDDWLRRDRFVFVGWSGLLLFPCAYFAVGGWFTGTTFVTSWYTHGLASSYLEGCNFLTAAVSTPANSLAHSLLLLWGPEAQGDFTRWCQLGGLWTFVALHGAFGLIGFMLRQFELARSVQLRPYNAIAFSGPIAVFVSVFLIYPLGQSGWFFAPSFGVAAIFRFILFFQGFHNWTLNPFHMMGVAGVLGAALLCAIHGATVENTLFEDGDGANTFRAFNPTQAEETYSMVTANRFWSQIFGVAFSNKRWLHFFMLFVPVTGLWMSALGVVGLALNLRAYDFVSQEIRAAEDPEFETFYTKNILLNEGIRAWMAAQDQPHENLIFPEEVLPRGNAL	334	41245	11	5
309	411	gi|89241666|emb|CAJ32388.1|	photosystem II protein D2 [Solanum lycopersicum] >gi|91208983|ref|YP_538843.1| photosystem II protein D2 [Solanum bulbocastanum] >gi|108773125|ref|YP_635634.1| photosystem II protein D2 [Solanum tuberosum] >gi|122209897|sp|Q2VEI1.1|PSBD_SOLTU RecNam	MTIAIGKFTKDENDLFDIMDDWLRRDRFVFVGWSGLLLFPCAYFAVGGWFTGTTFVTSWYTHGLASSYLEGCNFLTAAVSTPANSLAHSLLLLWGPEAQGDFTRWCQLGGLWTFVALHGAFGLIGFMLRQFELARSVQLRPYNAIAFSGPIAVFVSVFLIYPLGQSGWFFAPSFGVAAIFRFILFFQGFHNWTLNPFHMMGVAGVLGAALLCAIHGATVENTLFEDGDGANTFRAFNPTQAEETYSMVTANRFWSQIFGVAFSNKRWLHFFMLFVPVTGLWMSALGVVGLALNLRAYDFVSQEIRAAEDPEFETFYTKNILLNEGIRAWMAAQDQPHENLIFPEEVLPRGNAL	334	41259	11	5
325	427	gi|162689394|gb|EDQ75766.1|	predicted protein [Physcomitrella patens subsp. patens] >gi|168013819|ref|XP_001759464.1| predicted protein [Physcomitrella patens subsp. patens]	MASDGLSRIGLAGLAVMGQNLALNIAEKGFPISVYNRSASKVDETVERAKEEGNLPVKGFKDPCEFVKSIQKPRCIIILVKAGSPVDQTIELLSKYLEKGDCIIDGGNEWYENTERRAEKVKEKGLLYLGMGVSGGEEGARHGPSLMPGGTLEAYKYIEDIVQKVAAQVDSGPCVTYVGPGGAGNFVKMVHNGIEYGDMELIAEAYDVLKSVGGLSNKELHETFYEWNKGELESFLIEITADIFSVPDDKGEGELVDKVLDKTGMKGTGKWTVQQAAELSVAAPTIATSLDLRYLSGLKEERVEAAKVFKSLGVSDLLAEVKVDKQELIDNVRKALYASKICSYAQGMNLIRAKSIEKGWNLDLGELARIWKGGCIIRAKFLDRIKQAYDRDPKLASLL…	323	70116	8	1	---		---		---		---		---		---		---
339	443	gi|297804932|ref|XP_002870350.1|	hypothetical protein ARALYDRAFT_915516 [Arabidopsis lyrata subsp. lyrata] >gi|297316186|gb|EFH46609.1| hypothetical protein ARALYDRAFT_915516 [Arabidopsis lyrata subsp. lyrata]	MALLVEKTSSGREYKVKDMSQADFGRLELELAEVEMPGLMACRTEFGPSQPFKGARITGSLHMTIQTAVLIETLTALGAEVRWCSCNIFSTQDHAAAAIARDSAAVFAWKGETLQEYWWCTERALDWGPGGGPDLIVDDGGDATLLIHEGVKAEEIFEKTGQVPDPTSTDNPEFQIVLSIIKEGLQVDPKKYHKMKERLVGVSEETTTGVKRLYQMQENGTLLFPAINVNDSVTKSKFDNLYGCRHSLPDGLMRATDVMIAGKVAVICGYGDVGKGCAAAMKTAGARVIVTEIDPICALQALMEGLQVLTLEDVVSEADIFVTTTGNKDIIMVDHMRKMKNNAIVCNIGHFDNEIDMLGLETYPGVKRITIKPQTDRWVFPETKTGIIVLAEGRLMNLG…	312	64637	10	2	---		---		0.307		---		0.787		---		---
347	452	gi|225446775|ref|XP_002283048.1|	PREDICTED: hypothetical protein [Vitis vinifera] >gi|147787750|emb|CAN60827.1| hypothetical protein [Vitis vinifera]	MASTACFLHHHALSTPTRVSSQRQLPSLRPSQLVCRAQKQAANEDDGAAVSRRLALTVLIGAAAIGTKVNPADAAYGEAANVFGKPKTNTDFLPYNGEGFKLSIPSKWNPSKEREFPGQVLRYEDNFDSNSNVSVIITPTDKKSITDYGSPEEFLSKVDFLLGKQAFFGNANEGGFDADAVATANILESSTTTVGGKPYYTITVLTRTADGDEGGKHQLITAAVADGKLYICKVQAGDKRWFKGARKYVESTASSFSIA	308	33728	13	2	---		---		---		---		---		---		---
347	452	gi|302143507|emb|CBI22068.3|	unnamed protein product [Vitis vinifera]	MASTACFLHHHALSTPTRVSSQRQLPSLRPSQLVNPADAAYGEAANVFGKPKTNTDFLPYNGEGFKLSIPSKWNPSKEREFPGQVLRYEDNFDSNSNVSVIITPTDKKSITDYGSPEEFLSKVDFLLGKQAFFGNANEGGFDADAVATANILESSTTTVGGKPYYTITVLTRTADGDEGGKHQLITAAVADGKLYICKVQAGDKRWFKGARKYVESTASSFSIA	308	29544	13	2
348	453	gi|255540075|ref|XP_002511102.1|	ATP-dependent clp protease, putative [Ricinus communis] >gi|223550217|gb|EEF51704.1| ATP-dependent clp protease, putative [Ricinus communis]	MARLLVHSINVPALAPHIKHGQSQESGTSRRTATKMMCSSRLPALTLRGYTGLRSSNCLDTMLRSGLDFHSRVAITMSRRQQKAKRFLPRAMFERFTEKAIKVIMLAQEEARRLGHNFVGTEQILLGLIGEGTGIAAKVLKSMGINLKDARVEVEKIIGRGSGFVAVEIPFTPRAKRVLELSLEEARQLGHNYIGSEHLLLGLLREGEGVAARVLENLGADPSNIRTQVIRMVGESTENIPAPVGPGGGSNKMPTLEEYGTNLTKLAEEGKLDPVVGRQPQIERVIQILGRRTKNNPCLIGEPGVGKTAIAEGLAQRIASGDVPETIERKKVITLDMGLLVAGTKYRGEFEERLKKLMEEIKQSDEIILFIDEVHTLIGAGAAEGAIDAANILKPALAR…	308	121065	14	3	0.375		0.709	*	0.453		0.537	*	0.99		0.37	*	---
348	453	gi|296529748|emb|CBM38228.1|	unnamed protein product [Spinacia oleracea] >gi|4105131|gb|AAD02267.1| ClpC protease [Spinacia oleracea]	MAGALIQSTNIPSLAYKVNGQFQRSDKGNKAVKMMASLQDPGYRMRTFSGVRGGNALDTLGTTSECFYSKMRAVLSVRKGTASRGVVRAMFERFTEKAIKVIMLAQEEARRLGHNFVGTEQILLGLIGEGTGIAAKVLKSMGINLKDARVEVEKIIGRGSGFVAVEIPFTPRAKRVLELSLEEARQLGHNYIGSEHLLLGLLREGEGVAARVLENLGADPSNIRTQVIRMVGENTEAVGAGVGGGTTGNKMPTLEEYGTNLTKLAEEGKLDPVVGRQAQIERVTQILGRRTKNNPCLIGEPGVGKTAIAEGLAQRIATGDVPETIEGKKVITLHMGLLVAGTKYRGEFEERLKKLMEEIKQSDEIILFIDEVHTLIGAGAAEGAIDRANILKPRFRRGE…	308	119362	14	3
349	454	gi|1895084|gb|AAB49896.1|	golgi associated protein se-wap41 [Zea mays] >gi|162463414|ref|NP_001105598.1| alpha-1,4-glucan-protein synthase [UDP-forming] [Zea mays] >gi|34588146|sp|P80607.2|UPTG_MAIZE RecName: Full=Alpha-1,4-glucan-protein synthase [UDP-forming]; AltName: Ful	MAGTVTVPGSSTPSTPLLKDELDIVIPTIRNLDFLEMWRAFFQPYHLIIVQDGDPTKTIKVPEGFDYELYNRNDINRILGPKASCISFKDSACRCFGYMVSKKKYIYTIDDDCFVAKDPSGKDINALEQHIKNLLSPSTPFFFNTLYDPYREGADFVRGYPFSLREGAHTAVSHGLWLNIPDYDAPTQLVKPKERNERYVDAVMTIPKGTLFPMCGMNLAFDRDLIGPAMYFGLMGDGQPIGRYDDMWAGWCVKVICDHLSLGVKTGLPYIWHSKASNPFVNLKKEYKGIFWQEDIIPFFQNVTIPKDCDTVQKCYIYLSGQVKEKLGTIDPYFVKLGDAMVTWIEAWDELNPSTPAAANGKAK	307	50209	11	7	3.493	*	0.706		0.971		1.392		0.453		0.788	*	0.403	*
355	461	gi|147801802|emb|CAN74538.1|	hypothetical protein [Vitis vinifera]	MWRCVSRGLRFRSSGTSEAEIKAAIGELSKHGHGFNTACITKLFPTRSHTVAAQGGINAALGNMTEDDWRWHMYDTVKGSDWLGDQDAIQYMCREAPKAVIELENYGLPFSRTEDGRIYQRAFGGQSLNFGKGGQAYRCACAADRTGHALLHTLYGQAMKHNTQFFVEYFALDLLMDNDGACQGVIALNMEDGTLHRFQAASTILATGGYGRTYFSATSAHTCTGDGNAMVARAGLPLQDLEFVQFHPTGIYGAGCLITEGSRGEGGILRNSEGERFMERYAPTAKDLASRDVVSRSMTMEIREGRGVDHIYLHLNHLPPEVLKERLPGISETAAIFAGVDVTKEPIPVLPTVHYNMGGIPTNYHGEVLTIKGNDPDAVVPGLMAAGEAACASVHGANR…	301	72880	9	9
355	461	gi|159463224|ref|XP_001689842.1|	succinate dehydrogenase subunit A [Chlamydomonas reinhardtii] >gi|158283830|gb|EDP09580.1| succinate dehydrogenase subunit A [Chlamydomonas reinhardtii]	MPVLAKLLGGASKASSLQQLAGLGQRAALAATQQAGFASQSYPVIDHQYDAIVVGAGGAGLRAAVGLSELGFNTACITKLFPTRSHTVAAQGGINAALGNMTEDDWRWHAYDTIKGSDWLGDQDAIHYMCREAPKAVIELENYGLPFSRTEDGKIYQRAFGGQSLDFGKGGQAYRCACAADRTGHAMLHTLYGQAMKHDIQFYVEYFALDLIMDSDGVCRGVMALCMEDGTLHRFQAHQTVLATGGYGRAYFSATSAHTCTGDGNAMAARAGIPLQDLEFVQFHPTGIYGAGCLITEGSRGEGGILRNSEGERFMERYAPTAKDLASRDVVSRSMTMEIREGRGCGPEKDHIYLHLNHLPPELLAERLPGISETAAIFAGVDVTKEPIPVLPTVHYNMG…	301	77430	9	9
355	461	gi|195647178|gb|ACG43057.1|	succinate dehydrogenase flavoprotein subunit,mitochondrial precursor [Zea mays]	MWRSCVSRGLSRAKASASRLLSTASSSYTVVDHTYDAVVVGAGGAGLRAAIGLSEHGFNTACITKLFPTRSHTVAAQGGINAALGNMSEDDWRWHMYDTVKGSDWLGDQDSIQYMCREAPKAVIELENYGLPFSRTEEGKIYQRAFGGQSLDFGKGGQAYRCACAADRTGHAMLHTLYGQAMKHNTQFFVEYFALDLLMDNDGKCQGVIALNMEDGTLHRFRASNTILATGGYGRAYFSATSAHTCTGDGNAMVARAGLPLQDLEFVQFHPTGIYGAGCLITEGSRGEGGILRNSEGERFMERYAPTAKDLASRDVVSRSMTMEIREGRGVGPLKDHIYLHLNHLPPEVLKERLPGISETAAIFAGVDVTKEPIPVLPTVHYNMGGIPTNYHGEVVDIK…	301	77143	9	9
355	461	gi|222636391|gb|EEE66523.1|	hypothetical protein OsJ_23002 [Oryza sativa Japonica Group]	MWRGCVSRGLRSLSKGKGSSSSAPVSAAARLFSTASSSYTVVDHSYDAVVVGAGGAGLRAAIGLSEHGFNTACITKLFPTRSHTVAAQGGINAALGNMTEDDWRWHMYDTVKGSDWLGDQDSIQYMCREAPKAVIELENYGLPFSRTEDGKIYQRAFGGQSLDFGKGGQAYRCACAADRTGHAMLHTLYGQAMKHNTQFFVEYFALDLIMDSEGTCQGVIALNMEDGTLHRFRATNTILATGGYGRAYFSATSAHTCTGDGNAMVARAGLPLQGYGRAYFSATSAHTCTGDGNAMVARAGLPLQDLEFVQFHPTGIYGAGCLITEGSRGEGGILRNSEGERFMERYAPTAKDLASRDVVSRSMTMEIREGRGVGPLKDHIYLHLNHLPPEVLKERLPGI…	301	81498	9	9
355	461	gi|226493856|ref|NP_001146352.1|	hypothetical protein LOC100279930 [Zea mays] >gi|224034161|gb|ACN36156.1| unknown [Zea mays] >gi|224034159|gb|ACN36155.1| unknown [Zea mays] >gi|219886761|gb|ACL53755.1| unknown [Zea mays]	MWRSCVSRGLSRAKASASRLLSTASSSYTVVDHTYDAVVVGAGGAGLRAAIGLSEHGFNTACITKLFPTRSHTVAAQGGINAALGNMSEDDWRWHMYDTVKGSDWLGDQDSIQYMCREAPKAVIELENYGLPFSRTEEGKIYQRAFGGQSLDFGKGGQAYRCACAADRTGHAMLHTLYGQAMKHNTQFFVEYFALDLLMDNEGKCQGIIALNMEDGTLHRFRASNTILATGGYGRAYFSATSAHTCTGDGNAMVARAGLPLQDLEFVQFHPTGIYGAGCLITEGSRGEGGILRNSEGERFMERYAPTAKDLASRDVVSRSMTMEIREGRGVGPLKDHIYLHLNHLPPEVLKERLPGISETAAIFAGVDVTKEPIPVLPTVHYNMGGIPTNYHGEVVDIK…	301	77129	9	9
355	461	gi|226499336|ref|NP_001146722.1|	hypothetical protein LOC100280324 [Zea mays] >gi|219888493|gb|ACL54621.1| unknown [Zea mays]	MWRSCVSRGLSRAKASASRLLSTASSSYTVVDHTYDAVVVGAGGAGLRAAIGLSEHGFNTACITKLFPTRSHTVAAQGGINAALGNMSEDDWRWHMYDTVKGSDWLGDQDSIQYMCREAPKAVIELENYGLPFSRTEEGKIYQRAFGGQSLDFGKGGQAYRCACAADRTGHAMLHTLYGQAMKHNTQFFVEYFALDLLMDNDGKCQGVIALNMEDGTLHRFRASNTILATGGYGRAYFSATSAHTCTGDGNAMVARAGLPLQDLEFVQFHPTGIYGAGCLITEGSRGEGGILRNSEGERFMERYAPTAKDLASRDVVSRSMTMEIREGRGVGPLKDHIYLHLNHLPPEVLKERLPGISETAAIFAGVDVTKEPIPVLPTVHYNMGGIPTNYHGEVVDIK…	301	77460	9	9
355	461	gi|241917660|gb|EER90804.1|	hypothetical protein SORBIDRAFT_01g006490 [Sorghum bicolor] >gi|242032823|ref|XP_002463806.1| hypothetical protein SORBIDRAFT_01g006490 [Sorghum bicolor]	MWRGCVSRGLRKVKAAASASRLFSTSSSYTVVDHTYDAVVVGAGGAGLRAAIGLSEHGFNTACITKLFPTRSHTVAAQGGINAALGNMSEDDWRWHMYDTVKGSDWLGDQDSIQYMCREAPKAVIELENYGLPFSRTEDGKIYQRAFGGQSLDFGKGGQAYRCACAADRTGHAMLHTLYGQAMKHNTQFFVEYFALDLLMDNEGICQGVIALNMEDGTLHRFRAANTILATGGYGRAYFSATSAHTCTGDGNAMVARAGLPLQDLEFVQFHPTGIYGAGCLITEGSRGEGGILRNSEGERFMERYAPTAKDLASRDVVSRSMTMEIREGRGVGPLKDHIYLHLNHLPPEVLKERLPGISETAAIFAGVDVTKEPIPVLPTVHYNMGGIPTNYHGEVLHI…	301	76496	9	9
355	461	gi|297312576|gb|EFH43000.1|	succinate dehydrogenase 1-1 [Arabidopsis lyrata subsp. lyrata] >gi|297797713|ref|XP_002866741.1| succinate dehydrogenase 1-1 [Arabidopsis lyrata subsp. lyrata]	MWRCVSRGFRAPSSKTSSLFDGVSGSRFSRFFSTGSTDTRSSYTIVDHTYDAVVVGAGGAGLRAAIGLSEHGFNTACITKLFPTRSHTVAAQGGINAALGNMSEDDWRWHMYDTVKGSDWLGDQDAIQYMCREAPKAVIELENYGLPFSRTEEGKIYQRAFGGQSLDFGKGGQAYRCACAADRTGHALLHTLYGQAMKHNTQFFVEYFALDLLMASDGSCQGVIALNMEDGTLHRFRSSQTILATGGYGRAYFSATSAHTCTGDGNAMVARAGLPLQDLEFVQFHPTGIYGAGCLITEGSRGEGGILRNSEGERFMERYAPTAKDLASRDVVSRSMTMEIREGRGVGPHKDHIYLHLNHLPPEVLKERLPGISETAAIFAGVDVTKEPIPVLPTVHYNM…	301	77832	9	9
355	461	gi|297735168|emb|CBI17530.3|	unnamed protein product [Vitis vinifera] >gi|225430776|ref|XP_002269407.1| PREDICTED: hypothetical protein [Vitis vinifera]	MWRCVSRGLRFRSSDSKRSLTSEYLKPHISRFFSTESTGGGSSGTSEAEIKAAIGELSKHGVDTAGITELYRSSYTSSYTIVDHTYDAVVVGAGGAGLRAAIGLSEHGFNTACITKLFPTRSHTVAAQGGINAALGNMTEDDWRWHMYDTVKGSDWLGDQDAIQYMCREAPKAVIELENYGLPFSRTEDGRIYQRAFGGQSLNFGKGGQAYRCACAADRTGHALLHTLYGQAMKHNTQFFVEYFALDLLMDNDGACQGVIALNMEDGTLHRFQAASTILATGGYGRTYFSATSAHTCTGDGNAMVARAGLPLQDLEFVQFHPTGIYGAGCLITEGSRGEGGILRNSEGERFMERYAPTAKDLASRDVVSRSMTMEIREGRGVGPLKDHIYLHLNHLPPE…	301	83119	9	9
355	461	gi|297836578|ref|XP_002886171.1|	succinate dehydrogenase 1-2 [Arabidopsis lyrata subsp. lyrata] >gi|297332011|gb|EFH62430.1| succinate dehydrogenase 1-2 [Arabidopsis lyrata subsp. lyrata]	MWRCLRVASWRRSESNGAFITTRLSRFFSAPSSTGDRSSYTIVDHTYDAVVVGAGGAGLRAAIGLSEHGFNTACITKLFPTRSHTVAAQGGINAALGNMSEDDWRWHMYDTVKGSDWLGDQDAIQYMCREAPKAVIELENYGLPFSRTEEGKIYQRAFGGQSLDFGKGGQAYRCACAADRTGHALLHTLYGQAMKHNTQFFVEYFALDLIMNSDGTCQGVIALNMEDGTLHRFHAGSTILATGGYGRAYFSATSAHTCTGDGNAMVARAGLPLQDLEFVQFHPTGIYGAGCLITEGARGEGGILRNSEGEKFMDRYAPTARDLASRDVVSRSMTMEIREGRGAGPMKDHIYLHLNHLPPEVLKERLPGISETAAIFAGVDVTREPIPVLPTVHYNMGGI…	301	77326	9	9
355	461	gi|300264991|gb|EFJ49184.1|	succinate dehydrogenase subunit A, mitochondrial [Volvox carteri f. nagariensis] >gi|302836143|ref|XP_002949632.1| succinate dehydrogenase subunit A, mitochondrial [Volvox carteri f. nagariensis]	MSVLAKLLTGTAAKAQSTQLGLLGQRSILATAQQTALPELRGYASQTYPVIDHQYDAVVVGAGGAGLRAAVGLSELGFKTACVTKLFPTRSHTVAAQGGINAALGNMTEDDWRWHAYDTVKGSDWLGDQDAIHYMCREAPKAVIELENYGLPFSRTEDGKIYQRAFGGQSLDFGKGGQAYRCACAADRTGHAMLHTLYGMAMKHNIQFFVEYFALDLMMDSDGACRGIMALCMEDGTIHRFQAHQTVLATGGYGRAYFSATSAHTCTGDGGGMVARAGLPLQDLEFVQFHPTGIYGAGCLITEGCRGEGGILRNSEGERFMERYAPTAKDLASRDVVSRSMTIEIREGRGCGPEKDHIYLHLNHLPPELLAERLPGISETAAIFAGVDVTKEPIPVLPT…	301	78582	9	9
355	461	gi|34394418|dbj|BAC83515.1|	putative succinate dehydrogenase flavoprotein alpha subunit [Oryza sativa Japonica Group] >gi|115470493|ref|NP_001058845.1| Os07g0134800 [Oryza sativa Japonica Group] >gi|215686878|dbj|BAG89728.1| unnamed protein product [Oryza sativa Japonica Group	MWRGCVSRGLRSLSKGKGSSSSAPVSAAARLFSTASSSYTVVDHSYDAVVVGAGGAGLRAAIGLSEHGFNTACITKLFPTRSHTVAAQGGINAALGNMTEDDWRWHMYDTVKGSDWLGDQDSIQYMCREAPKAVIELENYGLPFSRTEDGKIYQRAFGGQSLDFGKGGQAYRCACAADRTGHAMLHTLYGQAMKHNTQFFVEYFALDLIMDSEGTCQGVIALNMEDGTLHRFRATNTILATGGYGRAYFSATSAHTCTGDGNAMVARAGLPLQDLEFVQFHPTGIYGAGCLITEGSRGEGGILRNSEGERFMERYAPTAKDLASRDVVSRSMTMEIREGRGVGPLKDHIYLHLNHLPPEVLKERLPGISETAAIFAGVDVTKEPIPVLPTVHYNMGGIP…	301	78316	9	9	2.038	*	2.013		0.719	*	1.226	*	3.276	*	0.604		0.398	*
355	461	gi|75216119|sp|Q9ZPX5.1|DHSA2_ARATH	RecName: Full=Succinate dehydrogenase [ubiquinone] flavoprotein subunit 2, mitochondrial; AltName: Full=Flavoprotein subunit 2 of complex II; Short=FP; Flags: Precursor >gi|4309723|gb|AAD15493.1| putative succinate dehydrogenase flavoprotein subunit	MWRCLRVASSSRRSESNGAFITSQLSRFFSAPPSAGDKSSYTIVDHTYDAVVVGAGGAGLRAAIGLSEHGFNTACITKLFPTRSHTVAAQGGINAALGNMSVDDWRWHMYDTVKGSDWLGDQDAIQYMCREAPKAVIELENYGLPFSRTEDGKIYQRAFGGQSLEFGIGGQAYRCACAADRTGHALLHTLYGQAMKHNTQFFVEYFALDLIMNSDGTCQGVIALNMEDGTLHRFHAGSTILATGGYGRAYFSATSAHTCTGDGNAMVARAGLPLQDLEFVQFHPTGIYGAGCLITEGARGEGGILRNSEGEKFMDRYAPTARDLASRDVVSRSMTMEIRQGRGAGPMKDYLYLYLNHLPPEVLKERLPGISETAAIFAGVDVTREPIPVLPTVHYNMGG…	301	77304	9	9
361	468	gi|15809970|gb|AAL06912.1|	At2g36530/F1O11.16 [Arabidopsis thaliana]	MATITVVKARQIFDSRGNPTVEVDIHTSNGIKVTAAVPSGASTGIYEALELRDGGSDYLGKGVSKAVGNVNNVIGPALIGKDPTQQTAIDNFMVHELDGTQNEWGWCKQKLGANAILAVSLAVCKAGAVVSGIPLYKHIANLAGNPKIVLPVPAFNVINGGSHAGNKLAMQEFMILPVGAASFKEAMKMGVEVYHHLKSVIKKKYGQDATNVGDEGGFAPNIQENKEGLELLKTAIEKAGYTGKVVIGMDVAASEFYSEDKTYDLNFKEENNNGSQKISGDALKDLYKSFVAEYPIVSIEDPFDQDDWEHYAKMTTECGTEVQIVGDDLLVTNPKRVAKAIAEKSCNALLLKVNQIGSVTESIEAVKMSKKAGWGVMTSHRSGETKDTFIADLAVGLST…	297	59823	7	6	1.65		0.672		16.495		43.183	*	3.625	*	0.825		12.181	*
361	468	gi|20260174|gb|AAM12985.1|	enolase (2-phospho-D-glycerate hydroylase) [Arabidopsis thaliana]	MATITVVKARQIFDSRGNPTVEVDIHTSNGIKVTAAVPSGASTGIYEALELRDGGSDYLGKGVSKAVGNVNNIIGPALIGKDPTQQTAIDNFMVHELDGTQNEWGWCKQKLGANAILAVSLAVCKAGAVVSGIPLYKHIANLAGNPKIVLPVPAFNVINDGSHAGNKLAMQEFMILPVGAASFKEAMKMGVEVYHHLKSVIKKKYGQDATNVGDEGGFAPNIQENKEGLELLKTAIEKAGYTGKVVIGMDVAASEFYSEDKTYDLNFKEENNNGSQKISGDALKDLYKSFVAEYPIVSIEDPFDQDDWEHYAKMTTECGTEVQIVGDDLLVTNPKRVAKAIAEKSCNALLLKVNQIGSVTESIEAVKMSKKAGWGVMTSHRSGETEDTFIADLAVGLST…	297	59592	7	6
361	468	gi|23297411|gb|AAN12963.1|	enolase (2-phospho-D-glycerate hydroylase) [Arabidopsis thaliana] >gi|4581151|gb|AAD24635.1| enolase (2-phospho-D-glycerate hydroylase) [Arabidopsis thaliana] >gi|119350|sp|P25696.1|ENO2_ARATH RecName: Full=Bifunctional enolase 2/transcriptional act	MATITVVKARQIFDSRGNPTVEVDIHTSNGIKVTAAVPSGASTGIYEALELRDGGSDYLGKGVSKAVGNVNNIIGPALIGKDPTQQTAIDNFMVHELDGTQNEWGWCKQKLGANAILAVSLAVCKAGAVVSGIPLYKHIANLAGNPKIVLPVPAFNVINGGSHAGNKLAMQEFMILPVGAASFKEAMKMGVEVYHHLKSVIKKKYGQDATNVGDEGGFAPNIQENKEGLELLKTAIEKAGYTGKVVIGMDVAASEFYSEDKTYDLNFKEENNNGSQKISGDALKDLYKSFVAEYPIVSIEDPFDQDDWEHYAKMTTECGTEVQIVGDDLLVTNPKRVAKAIAEKSCNALLLKVNQIGSVTESIEAVKMSKKAGWGVMTSHRSGETEDTFIADLAVGLST…	297	59534	7	6
361	468	gi|297827139|ref|XP_002881452.1|	hypothetical protein ARALYDRAFT_902771 [Arabidopsis lyrata subsp. lyrata] >gi|297327291|gb|EFH57711.1| hypothetical protein ARALYDRAFT_902771 [Arabidopsis lyrata subsp. lyrata]	MATITGVKARQIFDSRGNPTVEVDIHTSSGVKVTAAVPSGASTGIYEALELRDGGSDYLGKGVSKAVGNVNNIIGPALIGKDPTQQTAIDNFMVHELDGTQNEWGWCKQKLGANAILAVSLAVCKAGAVVSGIPLYKHIANLAGNPKIVLPVPAFNVINGGSHAGNKLAMQEFMILPVGASSFTEAMKMGVEVYHHLKSVIKKKYGQDATNVGDEGGFAPNIQENKEGLELLKTAIEKAGYTGKVVIGMDVAASEFYSSDKTYDLNFKEENNDGSQKISGDALKDLYKSFVSEYPIVSIEDPFDQDDWAHYAKMTTECGTEVQIVGDDLLVTNPKRVAKAIAEKSCNALLLKVNQIGSVTESIEAVKMSKKAGWGVMTSHRSGETEDTFIADLAVGLST…	297	59053	7	6
361	468	gi|62321401|dbj|BAD94751.1|	enolase [Arabidopsis thaliana]	MCVEVYHHLKSVIKKKYGQDATNVGDEGGFAPNIQENKEGLELLKTAIEKAGYTGKVVIGMDVAASEFYSEDKTYDLNFKEENNNGSQKISGDALKDLYKSFVAEYPIVSIEDPFDQDDWEHYAKMTTECGTEVQIVGDDLLVTNPKRVAKAIAEKSCNALLLKVNQIGSVTESIEAVKMSKKAGWGVMTSHRSGETEDTFIADLAVGLSTGQIKTGAPCRSERLAKYNQLLRIEEELGSEAIYAGVNFRKPVEPY	297	36035	7	6
373	483	gi|13873334|dbj|BAB44155.1|	hydroxypyruvate reductase [Bruguiera gymnorhiza]	MAKPVSIEVWNPRGRYRVVSTKPMPGTRWINLLVQQDCRLEICTEKKTILSVEDIIALMGDKCDGVIGQLTEDWGETLFAALSKAGGKAFSNMAVGYNNVDVNAANKYGVAVGNTPGVLTETTAELAASLSLAAARRIVEADEFMRAGLYDGWLPNLFVGNLLKGQTVGVIGAGRIGSAYARMMVEGFKMNLIYYDLYQATRLEKFVTAYGQFLKANGEQPVTWKRAATMDEVLREADVISLHPVLDKTTYHLINKESLASMKKEAVLVNCSRGPVIDEVALVEHLRRNPMFRVGLDVFEDEPYMKPGLADMKNAIVVPHIASASKWTREGMATLAALNVLGKIKGYPVWGDPNRVEPFLNENAPPPAACPSIVNSKALGLPVSKL	292	50036	11	2	---		1.261		2.001	*	---		0.899		1.927		1.551	*
374	484	gi|222834384|gb|EEE72861.1|	predicted protein [Populus trichocarpa] >gi|224111036|ref|XP_002332995.1| predicted protein [Populus trichocarpa]	MEPNTGVTFDDVAGVDEAKQDFMEVVEFLKKPERFTAVGARIPKGVLLVGPPGTGKTLLAKAIAGEAGVPFFSISGSEFVEMFVGVGASRVRDLFKKAKENVPCIVFVDEIDAVGRQRGTGIGGGNDEREQTLNQLLTEMDGFEGNTGIIVVAATNRADILDSALLRPGRFDRQVTVDVPDVRGRTEILKVHASNKKFDADVSLDVVAMRTPGFSGADLANLLNEAAILAGRRGKTAISSKEIDDSIDRIVAGMEGTVMTDGKSKSLVAYHEVGHAICGTLTPGHDAVQKVTLVPRGQARGLTWFIPADDPTLISKQQLFARIVGGLGGRAAEEVIFGESEVTTGAAGDLQQVTGLAKQMVTTFGMSEIGPWSLMDASAQSGDVIMRMMARNSMSEKLA…	291	57841	9	2
376	487	gi|227467174|emb|CAY37595.1|	unnamed protein product [Capsicum annuum] >gi|3559814|emb|CAA75777.1| transketolase 1 [Capsicum annuum]	MASSSLPLSQAILSRSIPRHGSSSSTNSQFSPSSLSLPTFSGLKSTTSTTFRRRTLPSPVAVRSPEIRASAAVETLEKTDNALVEKSVNTIRFLAIDAVEKANSGHPGLPMGCAPIGHILYDEIMRYNPKNPYWFNRDRFVLSAGHGCMLQYALLHLAGYDAVREEDLKSFRQWGSKTPGHPENFETPGVEVTTGPLGQGIANAVGLALSEKHLAARFNKPGAEIVDHYTYCILGDGCQMEGISQEAASLAGHWGLGKLIAFYDDNHISIDGDTEIAFTEDVGARFEALGWHVIWVKNGNTGYDEIRAAIKEAKAVTDKPTMIKVTTTIGFGSPNKANSYSVHGSALGAKEVEATRQNLGWPYEPFHVPEDVKSHWSRHVPEGAALEAGWNTKFAEYEK…	287	93174	13	3	1.002		1.164		22.942		9.37		46.347		2.073		---
378	489	gi|115444503|ref|NP_001046031.1|	Os02g0171100 [Oryza sativa Japonica Group] >gi|222622270|gb|EEE56402.1| hypothetical protein OsJ_05558 [Oryza sativa Japonica Group] >gi|49388082|dbj|BAD25194.1| putative glyceraldehyde-3-phosphate dehydrogenase [Oryza sativa Japonica Group] >gi|215	MAQQLSAPFRAAAAAGSRASAAAADPAKVLRLRSAGSAQFTSIAASSSFARNIEPLRAIATQAPPAVPQYSSGEKTKVGINGFGRIGRLVLRIATSRDDIEVVAVNDPFIDAKYMAYMFKYDSTHGPFKGSIKVVDDSTLEINGKKVTITSKRDPADIPWGNFGAEYVVESSGVFTTTEKASAHLKGGAKKVVISAPSADAPMFVVGVNEKSYDPKMNVVSNASCTTNCLAPLAKVVHEEFGIVEGLMTTVHATTATQKTVDGPSMKDWRGGRGAAQNIIPSSTGAAKAVGKVLPELNGKLTGMAFRVPTPNVSVVDLTCRIEKSASYDDVKAAIKAASEGALKGILGYTDEDVVSNDFVGDARSSIFDAKAGIGLSSSFMKLVSWYDNEWGYSNRVLD…	287	52587	8	4
379	490	gi|116831754|gb|ABK28851.1|	alpha-tubulin [Medicago truncatula] >gi|124361008|gb|ABN08980.1| Tubulin/FtsZ, C-terminal [Medicago truncatula]	MREIISIHIGQAGIQVGNSCWELYCLEHGIQPDGLMPSDTTPGVAHDAFNTFFSETGSGKHVPRALFVDLEPTVIDEVRTGSYRQLFHPEQLISGKEDAANNFARGHYTVGREIVELCLDRIRKLADNCTGLQGFFVFNAVGGGTGSGLGSLLLERLSVDYGKKSKLGFTIYPSPQVSTAVVEPYNSVLSTHSLLEHTDVVVLLDNEAIYDICRKSLDIERPTYTNLNRLISQVISSLTTSLRFDGAINVDVTEFQTNLVPYPRIHFMLSSYAPVISSAKAYHEQISVPEITNAVFEPSSMMAKCDPRHGKYMACCLMYRGDVVPKDVNAAVSNIKTKRTVQFVDWCPTGFKCGINYQPPTVVPGGDLAKVMRAVCMISNNTAVAEVFSRIDHKFDLMY…	286	56237	11	5	0.479	*	0.429		0.171	*	0.414		1.941		0.287	*	0.068	*
379	490	gi|295389390|dbj|BAJ06365.1|	alpha-tubulin [Alopecurus aequalis]	MREIISIHIGQAGIQVGNSCWELYCLEHGIQPDGIMPSDTSVGVAKDAFNTFFSETGTGKHVPRALFVDLEPTVIDEVRTGAYRQLFHPEQLISHKEDAANNFARGHYTVGREVVDLCLDRIRKLADNCTGLQGFLIFNAVGGGTGSGLGSLLLERLSVDYGRKSKLGFTIYPSPQISTAVVEPYNSVLSTHSLIEHTDVVVMLDNEAIYDICKRSLDIERPTYTNLNRLISQVISSLTTSLRFDGAINVDITEFQTNLVPYPRIHFMLSSYAPIISAEKAFHEQHSVPEITNSVFEPSSVMAKCDPRQGKYMACCLMYRGDVVPKDVNTAVHSIKTKRTVQFVDWCPTGFKCGINYQPPTVVPGGDLAKVRRAVCMISNNTAVADVFARIDHKFDLMY…	286	56337	11	5
386	497	gi|146744194|gb|ABQ43266.1|	ATP synthase CF1 epsilon subunit [Chloranthus spicatus] >gi|149390274|ref|YP_001294104.1| ATP synthase CF1 epsilon subunit [Chloranthus spicatus]	MTLNLCVLTPNRIIWDSEVKEIILSTNSGQIGVLPNHAPIATAVDIGILRIRLNDQWLTMALMGGFARIGNNEITILVNDAEKGSDIDPQEAQQTLEIAEANLSRAEGKRQAIEANLAIRRARTRVEAINVIS	281	15833	6	3
386	497	gi|34481635|emb|CAD45113.1|	ATPase epsilon subunit [Amborella trichopoda] >gi|34500920|ref|NP_904105.1| ATP synthase CF1 epsilon subunit [Amborella trichopoda] >gi|60389667|sp|Q70XZ7.1|ATPE_AMBTC RecName: Full=ATP synthase epsilon chain, chloroplastic; AltName: Full=ATP syntha	MTLNLCVLTPNRIIWDSEVKEIILSTNSGQIGVLPNHAPIATAVDIGILKIRLQEQWLTMALMGGFARIGNNEITILVNDAEKGSDIDPQEAQQTLEIAEANLSRAEGKRQTIEANLALRRARTRVEAINAISS	281	16226	6	3	---		0.882		---		---		0.777		0.937		---
396	507	gi|147770035|emb|CAN74334.1|	hypothetical protein [Vitis vinifera]	MADTEITNVTEYEAIAKAKLPKMAFDYYASGAEDQWTLRENRNAFSRILFRPRILIDVSKIDMTTTVLGFKISMPIMIAPTAFQKMAHPEGEYATARAASAAGTIMTLSSWATSSVEEVASTGPGIRFFQLYVYKDRHVVAQLVRRAERAGFKAIALTVDTPRLGRREDDIKNRFTLPPFLTLKNFEGLDLGKMDKADDSGLASYVAGQIDRSLSWKDVKWLQTITKLPILVKGVLTAEDARIAVNVGAAGIIVSNHGARQLDYVPATIMALEEVVKATQGRIPVFLDGGVRRGTDVFKALALGASGIFIGRPVVYSLAADGEAGVRKALQMLRDEFELTMALSGCRSLKEIXRNHIMTDWDXPHILPKPRL	276	47723	13	4	0.456		1.525	*	0.655	*	0.411	*	0.743		0.842		0.568	*
396	507	gi|297740741|emb|CBI30923.3|	unnamed protein product [Vitis vinifera] >gi|225443896|ref|XP_002278104.1| PREDICTED: hypothetical protein [Vitis vinifera]	MADTEITNVTEYEAIAKAKLPKMAFDYYASGAEDQWTLRENRNAFSRILFRPRILIDVSKIDMTTTVLGFKISMPIMIAPTAFQKMAHPEGEYATARAASAAGTIMTLSSWATSSVEEVASTGPGIRFFQLYVYKDRHVVAQLVRRAERAGFKAIALTVDTPRLGRREADIKNRFTLPPFLTLKNFEGLDLGKMDKADDSGLASYVAGQIDRSLSWKDVKWLQTITKLPILVKGVLTAEDARIAVNVGAAGIIVSNHGARQLDYVPATIMALEEVVKATQGRIPVFLDGGVRRGTDVFKALALGASGIFIGRPVVYSLAADGEAGVRKALQMLRDEFELTMALSGCRSLKEISRNHIMTDWDAPHILPKPRL	276	47615	13	4
402	515	gi|241941185|gb|EES14330.1|	hypothetical protein SORBIDRAFT_07g028940 [Sorghum bicolor] >gi|242080133|ref|XP_002444835.1| hypothetical protein SORBIDRAFT_07g028940 [Sorghum bicolor]	MAPALSGTLGASSVAALRPCAGRRAPSAATSVAPRGSGVARCARGLRWEAHRSRGRSLRVRCDAAVAEKPAGEEAAGEQFEYQAEVSRLMDLIVHSLYSHKEVFLRELVSNASDALDKLRFLGVTDSSLLADGGELEIRIKPDPDAGTITITDTGVGMTKDELKDCLGTIAQSGTSKFLKALKENKDLGADNGLIGQFGVGFYSAFLVAEKIVVSTKSPKSDKQYVWEAVADSSSYIIKEETDPEKMLTRGTQITLFLRSDDKYEFADPSRIQGLVKNYSQFVSFPIYTWQEKSRTVEVEEDEEPKEGEEATEGEKKKKKKTVTEKYWDWELANETKPIWMRNPKEIENTEYNEFYKKTFNEFLDPLAHTHFTTEGEVEFRSVLYVPGMAPLSNEEIMN…	271	109265	10	6
403	516	gi|147795191|emb|CAN69459.1|	hypothetical protein [Vitis vinifera]	MASHAALASSRIPTTNTRLPSKASHSFPTQFFAKRLEVAEFSGLRSGGCVTFAKNAREPSFFDVVASQLTPKAGGPAPVRGETVAKLKVAINGFGRIGRNFLRCWHGRKDSPLDVIVVNDSGGVKNASHLLKYDSMLGTFKAEVKIVDNETISVDGKPIKVVSSRDPLKLPWAELGIDIVIEGTGVFVDGPGAGKHIQAGAKKVIITAPAKGADIPTYVVGVNEGDYSHEVSNIVSNASCTTNCLAPFVKILDEELGIVKGTMTTTHSYTGDQRLLDASHRDLRRARAAALNIVPTSTGAAKAVSLVLPQLKGKLNGIALRVPTPNVSVVDLVVNVEKKGITAEDVNAAFRKAADGPLKGILAVCDVPLVSVDFKCSDVSSTIDASLTMVMGDDMVKVV…	271	58561	12	1	---		---		---		---		---		---		---
403	516	gi|222842358|gb|EEE79905.1|	predicted protein [Populus trichocarpa] >gi|224061855|ref|XP_002300632.1| predicted protein [Populus trichocarpa]	IPANTRLPSKTNHSFPTQCSSKRLEVAEFSGLRASSCVTYAKNASEGSFFDMVASQLAPKVAVSTPVRAETVSKLKVAINGFGRIGRNFLRCWHGRKDSPLDVIVVNDSGGVKNASHLLKYDSMLGTFKAEVKIVDNETISVDGKPIKVVSNRDPLKLPWAELGIDIVIEGTGVFVDGPGAGKHIQAGAKKVIITAPAKGADIPTYVVGVNEKDYDHEVSNIVSNASCTTNCLAPFVKVMDEEFGIVKGTMTTTHSYTGDQRLLDASHRDLRRARAAALNIVPTSTGAAKAVSLVLPQLKGKLNGIALRVPTPNVSVVDLVVNVEKKGITAEDVNAAFRKAAEGPLKGVLDVCDVPLVSVDFRCSDVSSTIDSSLTMVMGDDMIKVVAWYDNEWGYSQR…	271	57551	12	1
403	516	gi|222857255|gb|EEE94802.1|	predicted protein [Populus trichocarpa] >gi|224086078|ref|XP_002307806.1| predicted protein [Populus trichocarpa]	MATHAALASSRIPANTRLPSKINHSFPTQSSLKRLEVAEFSGLRASSCVTYAKNASEGSFFDVVASQLAPKVAVSTPVRAETVAKLKVAINGFGRIGRNFLRCWHGRKDSPLDVIVVNDSGGVKNASHLLKYDSMLGTFKAEVKIVDNETISVDGKPIKVVSNRDPLKLPWAELGIDIVIEGTGVFVDGPGAGKHIQAGATKVIITAPAKGADIPTYVVGVNEKDYDHEVANIISNASCTTNCLAPFVKVMDEEFGIVKGTMTTTHSYTGDQRLLDASHRDLRRARAAALNIVPTSTGAAKAVSLVLPQLKGKLNGIALRVPTPNVSVVDLVVNVEKKGITAEDVNGAFRKAAEGPLKGVLDVCDVPLVSVDFRCSDVSSTIDSSLTMVMGDDMIKVVA…	271	58330	12	1
403	516	gi|225457604|ref|XP_002273783.1|	PREDICTED: hypothetical protein isoform 2 [Vitis vinifera]	MASHAALASSRIPTTNTRHPSKASQQRLEVAEFSGLRSGGCVTFAKNAREPSFFDVVASQLTPKAGGPAPVRGETVAKLKVAINGFGRIGRNFLRCWHGRKDSPLDVIVVNDSGGVKNASHLLKYDSMLGTFKAEVKIVDNETISVDGKPIKVVSSRDPLKLPWAELGIDIVIEGTGVFVDGPGAGKHIQAGAKKVIITAPAKGADIPTYVVGVNEGDYSHEVSNIVSNASCTTNCLAPFVKILDEELGIVKGTMTTTHSYTGDQRLLDASHRDLRRARAAALNIVPTSTGAAKAVSLVLPQLKGKLNGIALRVPTPNVSVVDLVVNVEKKGITAEDVNAAFRKAADGPLKGILAVCDVPLVSVDFKCSDVSSTIDASLTMVMGDDMVKVVAWYDNEWG…	271	57346	12	1
403	516	gi|297745579|emb|CBI40744.3|	unnamed protein product [Vitis vinifera] >gi|225457606|ref|XP_002273754.1| PREDICTED: hypothetical protein isoform 1 [Vitis vinifera]	MASHAALASSRIPTTNTRHPSKASHSFPTQFFAKRLEVAEFSGLRSGGCVTFAKNAREPSFFDVVASQLTPKAGGPAPVRGETVAKLKVAINGFGRIGRNFLRCWHGRKDSPLDVIVVNDSGGVKNASHLLKYDSMLGTFKAEVKIVDNETISVDGKPIKVVSSRDPLKLPWAELGIDIVIEGTGVFVDGPGAGKHIQAGAKKVIITAPAKGADIPTYVVGVNEGDYSHEVSNIVSNASCTTNCLAPFVKILDEELGIVKGTMTTTHSYTGDQRLLDASHRDLRRARAAALNIVPTSTGAAKAVSLVLPQLKGKLNGIALRVPTPNVSVVDLVVNVEKKGITAEDVNAAFRKAADGPLKGILAVCDVPLVSVDFKCSDVSSTIDASLTMVMGDDMVKVV…	271	58585	12	1
408	521	gi|225466944|ref|XP_002263330.1|	PREDICTED: hypothetical protein [Vitis vinifera]	MACIPTQDHGLRKVESIIAAILIFVQISSPLPIVAWDSMSISPAKAVLYSPDTKVPRTGELALRKAIPANTNMKAIQDSLEEISYLLRIPQRKPYGTMEGNVKKSLKIAMDEKESILATLPPDLKEKGSTLYASLIDGKIPP	267	19818	6	6
408	521	gi|302143058|emb|CBI20353.3|	unnamed protein product [Vitis vinifera]	MAFPLSSATLSHKFSFNVSIPSFTSKQSFLSTHLPIQLTSPRPLRPIFSKNPILEFTDRLDVPTMACIPTQDHGLRKVESIIAAILIFVQISSPLPIVAWDSMSISPAKAVLYSPDTKVPRTGELALRKAIPANTNMKAIQDSLEEISYLLRIPQRKPYGTMEGNVKKSLKIAMDEKESILATLPPDLKEKGSTLYASLIDGKGGLQALLQCVKDKDPDKVSVGLASSLDTVAELELLQAPGLSFLLPEQYLKYPRLVGRGIIEFTIEKGDGSSFSPEAGGESRKTATIQVVIDGYSTPLTSGNFAKLVIDGAYDGAKLNLINQAILSDNKNIGYSLPLEIMPSGQFEPLYRTTLNVQDGELPVLPLSVYGAVAMAHSETSDEYSSPYQFFFYLYDKRS…	267	58218	6	6
410	523	gi|108710847|gb|ABF98642.1|	Tubulin alpha-1 chain, putative, expressed [Oryza sativa Japonica Group] >gi|125545580|gb|EAY91719.1| hypothetical protein OsI_13361 [Oryza sativa Indica Group] >gi|113549603|dbj|BAF13046.1| Os03g0726100 [Oryza sativa Japonica Group] >gi|125587773|g	MRECISIHIGQAGIQVGNACWELYCLEHGIQADGQMPSDRTVGGGDDAFNTFFSETGAGKHVPRAVFVDLEPTVIDEVRTGCYRQLFHPEQLINGKEDAANNFARGHYTIGKEIVDLCLDRIRKLADNCTGLQGFLVFNAVGGGTGSGLGSLLLERLSVDYGKKSKLGFTVYPSPQVSTSVVEPYNSVLSTHSLLEHTDVAVLLDNEAIYDICRRSLDIERPTYTNLNRLVSQVISSLTASLRFDGALNVDVNEFQTNLVPYPRIHFMLSSYAPVISAEKAYHEQLSVAEITNSAFEPSSMMAKCDPRHGKYMACCLMYRGDVVPKDVNAAVATIKTKRTIQFVDWCPTGFKCGINYQPPSVVPSGDLAKVQRAVCMISNSTSVVEVFSRIDHKFDLMY…	267	56308	11	2
410	523	gi|110617748|gb|ABG78593.1|	alpha-tubulin [Oryza sativa Japonica Group]	MRECISIHIGQAGIQVGNACWELYCLEHGIQPEGQMPGDKTVGGGDDAFNTFFSETGAGKHVPRAVFVDLEPTVIDEVRTGDYRQLFHPEQLISGKEDAANNFARGHYSIGKEIVDLCLDRIRKLADNCTGLQGFLVFNAVGGGTGSGLGSLLLERLSVDYGKKSKLGFTVYPSPQVSTSVVEPYNSVLSTHSLLEHTDVAVLLDNEAIYDICRRSLDIERPTYTNLNRLVSQVISSLTASLRFDGALNVDVNEFQTNLVPYPRIHFMLSSYAPVISAEKAYHEQLSVAEITNSAFEPSSMMAKCDPRHGKYMACCLMYRGDVVPKDVNAAVATIKTKRTIQFVDWCPTGFKCGINYQPPSVVPGGDLAKVQRAVCMISNSTSVVEVFSRIDIKFDLMY…	267	56474	11	2
410	523	gi|110742192|dbj|BAE99023.1|	tubulin alpha-2/alpha-4 chain [Arabidopsis thaliana]	MRECISIHIGQAGIQVGNACWELYCLEHGIQPDGQMPSDKTVGGGDDAFNTFFSETGAGKHVPRAVFVDLEPTVIDEVRTGTYRQLFHPEQLISGKEDAANNFARGHYTIGKEIVDLCLDRIRKLADNCTGLQGFLVFNAVGGGTGSGLGSLLLERLSVDYGKKSKLGFTVYPSPQVSTSVVEPYNSVLSTHSLLEHTDVSILLDNEAIYDICRRSLSIERPTYTNLNRLVSQVISSLTASLRFDGALNVDVTEFQTNLVPYPRIHFMLSSYAPVISAEKAFHEQLSVAEITNSAFEPASMMAKCDPRHGKYMACCLMYRGDVVPKDVNAAVGTIKTKRTIQFVDWCPTGFKCGINYQPPTVVPGGDLAKVQRAVCMISNSTSVAEVFSRIDHKFDLMY…	267	56206	11	2
410	523	gi|1136120|emb|CAA62916.1|	alpha-tubulin [Oryza sativa (japonica cultivar-group)]	MRECISIHIGQAGIQVGNACWELYCLEHGIQADGQMPSDRTVGGGDDAFNTSFSETGAGKHVPRAVFVDLEPTVIDEVRTGCYRQLFHPEQLINGKEDAANNFARGHYTIGKEIVDLCLDRIRKLADNCTGLQGFLVFNAVGGGTGSGLGSLLLERLSVDYGKKSKLGFTVYPSPQVSTSVVEPYNSVLSTHSLLEHTDVAVLLDNEAIYDICRRSLDIERPTYTNLNRLVSQVISSLTASLRFDGALNVDVNEFQTNLVPYPRIHFMLSSYAPVISAEKAYHEQLSVAEITNSAFEPSSMMAKCDPRHGKYMACCLMYRGDVVPKDVNAAVATIKTKRTIQFVDWCPTGFKCGINYQPPSVVPSGDLAKVQRAVCMISNSTSVVEVFSRIDHKFDLMY…	267	56264	11	2
410	523	gi|115484939|ref|NP_001067613.1|	Os11g0247300 [Oryza sativa Japonica Group] >gi|215734892|dbj|BAG95614.1| unnamed protein product [Oryza sativa Japonica Group] >gi|62734655|gb|AAX96764.1| Tubulin/FtsZ family, GTPase domain, putative [Oryza sativa Japonica Group] >gi|306415991|gb|AD	MRECISIHIGQAGIQVGNACWELYCLEHGIQPDGQMPGDKTVGGGDDAFNTFFSETGAGKHVPRAVFVDLEPTVIDEVRTGDYRQLFHPEQLISGKEDAANNFARGHYTIGKEIVDLCLDRIRKLADNCTGLQGFLVFNAVGGGTGSGLGSLLLERLSVDYGKKSKLGFTVYPSPQVSTSVVEPYNSVLSTHSLLEHTDVAVLLDNEAIYDICRRSLDIERPTYTNLNRLVSQVISSLTASLRFDGALNVDVNEFQTNLVPYPRIHFMLSSYAPVISAEKAYHEQLSVAEITNSAFEPSSMMAKCDPRHGKYMACCLMYRGDVVPKDVNAAVATIKTKRTIQFVDWCPTGFKCGINYQPPSVVPGGDLAKVQRAVCMISNSTSVVEVFSRIDIKFDLMY…	267	56474	11	2
410	523	gi|134035502|gb|ABO47739.1|	alpha-tubulin [Gossypium hirsutum]	MRECISIHIGQAGIQVGNACWELYCLEHGIQPDGQMPSDKTVGGGDDAFNTFFSETGAGKHVPRAVFVDLEPTVIDEVRTGAYRQLFHPEQLISGKEDAANNFARGHYTIGKEIVDLCLDRIRKLADNCTGLQGFLVFNAVGGGTGSGLGSLLLERLSVDYGKKSKLGFTVYPSPQVSTSVVEPYNSVLSTHSLLEHTDVAVLLDNEAIYDICRRSLDIERPTYTNLNRLVSQVISSLTASLRFDGALNVDVTEFQTNLVPYPRIHFMLSSYAPVISAEKAYHEQLSVAEITNSAFEPSSMMAKCDPRHGKYMACCLMYRGDVVPKDVNAAVATIKTKRTIQFVDWCPTGFKCGINYQPPTVVPGGDLAKVQRAVCMISNSTSVAEVFSRIDHKFDLMY…	267	56278	11	2
410	523	gi|135398|sp|P14640.1|TBA1_MAIZE	RecName: Full=Tubulin alpha-1 chain; AltName: Full=Alpha-1-tubulin >gi|22147|emb|CAA33734.1| alpha1-tubulin [Zea mays]	MRECISIHIGQAGIQVGNACWELYCLEHGIQADGQMPGDKTIGGGDDAFNTFFSETGAGKHVPRAVFVDLEPTVIDEVRTGTYRQLFHPEQLISGKEDAANNFARGHYTIGKEIVDLCLDRIRKLADNCTGLQGFLVFNAVGGGTGSGLGSLLLERLSVDYGKKSKLGFTVYPSPQVSTSVVEPYNSVLSTHSLLEHTDVAILLDNEAIYDICRRSLDIERPTYTNLNRLVSQVISSLTASLRFDGALNVDVNEFQTNLVPYPRIHFMLSSYAPVISAEKAYHEQLSVAEITNSAFEPSSMMAKCDPRHGKYMACCLMYRGDVVPKDVNAAVATIKTKRTIQFVDWCPTGFKCGINYQPPSVVPGGDLAKVQRAVCMISNSTSVVEVFSRIDHKFDLMY…	267	56468	11	2
410	523	gi|147223563|emb|CAN08490.1|	unnamed protein product [Zea mays] >gi|229611053|emb|CAY56112.1| unnamed protein product [Zea mays]	MGTAQRQASSYSPISATQSFPQFPPFSHFSPPPPLPPFNNTMRECISIHIGQAGIQVGNACWELYCLEHGIQADGQMPGDKTIGGGDDAFNTFFSETGAGKHVPRAVFVDLEPTVIDEVRTGTYRQLFHPEQLISGKEDAANNFARGHYTIGKEIVDLCLDRIRKLADNCTGLQGFLVFNAVGGGTGSGLGSLLLERLSVDYGKKSKLGFTVYPSPQVSTSVVEPYNSVLSTHSLLEHTDVAVLLDNEAIYDICRRSLDIERPTYTNLNRLVSQVISSLTASLRFDGALNVDVNEFQTNLVPYPRIHFMLSSYAPVISAEKAYHEQLSVAEITNSAFEPSSMMAKCDPRHGKYMACCLMYRGDVVPKDVNAAVATIKTKRTIQFVDWCPTGFKCGINYQ…	267	60896	11	2
410	523	gi|147223961|emb|CAN08694.1|	unnamed protein product [Zea mays] >gi|229611746|emb|CAY56347.1| unnamed protein product [Zea mays]	MASSYSPTSAAQTFPPSPNSFRRPPLHPYDDTMRECISIHIGQAGIQVGNACWELYCLEHGIQADGQMPGDKTIGGGDDAFNTFFSETGAGKHVPRAVFVDLEPTVIDEVRTGTYRQLFHPEQLISGKEDAANNFARGHYTIGKEIVDLCLDRIRKLADNCTGLQGFLVFNAVGGGTGSGLGSLLLERLSVDYGKKSKLGFTVYPSPQVSTSVVEPYNSVLSTHSLLEHTDVAILLDNEAIYDICRRSLDIERPTYTNLNRLVSQVISSLTASLRFDGALNVDVNEFQTNLVPYPRIHFMLSSYAPVISAEKAYHEQLSVAEITNSAFEPSSMMAKCDPRHGKYMACCLMYRGDVVPKDVNAAVATIKTKRTIQFVDWCPTGFKCGINYQPPSVVPGGD…	267	59971	11	2
410	523	gi|153799903|gb|ABS50670.1|	alpha-tubulin [Eucalyptus grandis]	MRECISIHIGQAGIQVGNACWELYCLEHGIQPDGQMPGDKTVGGGDDAFNTFFSETGAGKHVPRAVFVDLEPTVIDEVRTGTYRQLFHPEQLISGKEDAANNFARGHYTIGKEIVDLCLDRIRKLADNCTGLQGFLVFNSVGGGTGSGLGSLLLERLSVDYGKKSKLSFTVYPSPQVSTSVVEPYNSVLSTHSLLEHTDVAVLLDNEAIYDICRRSLDIERPTYTNLNRLVSQVISSLTASLRFDGALNVDVTEFQTNLVPYPRIHFMLSSYAPVISAEKAYHEQLSVAEITNSAFEPSSMMAKCDPRHGKYMACCLMYRGDVVPKDVNAAVATIKTKRTIQFVDWCPTGFKCGINYQPPTVVPGGDLAKVQRAVCMISNSTSVAEVFSRIDHKFDLMY…	267	56395	11	2
410	523	gi|1556446|gb|AAB08791.1|	alpha tubulin [Hordeum vulgare subsp. vulgare]	MRECISIHIGQAGIQVGNACWELYCLEHGIQPDGQMPGDKTVGGGDDAFNTFFSETGAGKHVPRAVFVDLEPTVIDEVRTGAYRQLFHPEQLISGKEDAANNFARGHYTIGKEIVDLCLDRIRKLSDNCTGLQGFLVFNAVGGGTGSGLGSLLLERLSVDYGKKSKLGVHSVPSPQVSTSVVEPYNSVLSTHSLLEHTDVSILLDNEAIYDICRRSLDIERPTYTNLNRLVSQVISSLTASLRFDGALNVDVNEFQTNLVPYPRIHFMLSSYAPVISAEKAYHEQLSVAEITNSAFEPSSMMAKCDPRHGKYMACCLMYRGDVVPKDVNAAVATIKTKRTIQFVDWCPTGFKCGINYQPPGVVPGGDLAKVQRAVCMISNSTSVVEVFSRIDHKFDLMY…	267	56350	11	2
410	523	gi|161334798|gb|ABX57816.1|	alpha tubulin [Picea wilsonii]	MRECISIHIGQAGIQVGNACWELYCLEHGIQPDGQMPSDKTVGGGDDAFNTFFSETGAGKHVPRAVFVDLEPTVIDEVRTGTYRQLFHPEQLISGKEDAANNFARGHYTIGKEIVDLCLDRIRKLADNCTGLQGFLVFNAVGGGTGSGLGSLLLERLSVDYGKKSKLGFTVYPSPQVSTSVVEPYNSVLSTHSLLEHTDVAVLLDNEAIYDICRRSLDIERPTYTNLNRLVSQVISSLTASLRFDGALNVDVTEFQTNLVPYPRIHFMLSSYAPVISAEKAYHEQLSVAEITNSAFEPSSMMAKCDPRHGKYMACCLMYRGDVVPKDVNAAVATIKTKRTIQFVDWCPTGFKCGINYQPPTVVPGGDLAKVQRAVCMISNSTSVAEVFSRIDHKFDLMY…	267	56321	11	2
410	523	gi|16226462|gb|AAL16174.1|AF428406_1	AT4g14960/dl3520c [Arabidopsis thaliana]	MRECISIHIGQAGIQVGNACWELYCLEHGIQPDGQMPGDKIVGGGDDAFNTFFSETGAGKHVPRAVFVDLEPTVIDEVRTGTYRQLFHPEQLISGKEDAANNFARGHYTIGKEIVDLCLDRIRKLADNCTGLQGFLVFNAVGGGTGSGLGSLLLERLSVDYGKKSKLGFTVYPSPQVSTSVVEPYNSVLSTHSLLEHTDVSILLDNEAIYDICRRSLNIERPTYTNLNRLVSQVISSLTASLRFDGALNVDVTEFQTNLVPYPRIHFMLSSYAPVISAEKAFHEQLSVAEITNSAFEPASMMAKCDPRHGKYMACCLMYRGDVVPKDVNAAVGTIKTKRTIQFVDWCPTGFKCGINYQPPTVVPGGDLAKVQRAVCMISNSTSVAEVFSRIDHKFDLMY…	267	57152	11	2
410	523	gi|20413|emb|CAA47635.1|	alpha-tubulin [Prunus dulcis] >gi|464849|sp|P33629.1|TBA_PRUDU RecName: Full=Tubulin alpha chain	MRECISIHIGQAGIQVGNACWELYCLEHGIQPDGQMPGDKTVGGGDDAFNTFFSETGAGKHVPRAVFVDLEPTVIDEVRTGTYRQLFHPEQLISGKEDAANNFARGHYTIGKEIVDLCLDRIRKLADNCTGLQGFLVFNAVGGGTGSGLGSLLLERLSVDYGKKSKLGFTVYPSPQVSTSVVEPYNSVLSTHSLLEHTDVAVLLDNEAIYDICRRSLDIERPTYTNLNRLVSQVISSLTASLRFDGALNVDVTEFQTNLVPYPRIHFMLSSYAPVISAEKAYHEQLSVAEITNSAFEPSSMMAKCDPRHGKYMACCLMYRGDVVPKDVNAAVATIKTKRTIQFVDWCPTGFKCGINYQPPTVVPGGDLAKVQRAVCMISNSTSVAEVFSRIDHKFDLMY…	267	56264	11	2	0.72	*	0.539	*	0.324	*	0.533	*	2.659	*	0.535	*	0.5	*
410	523	gi|214003725|gb|ACJ60905.1|	alpha tubulin [Betula pendula]	MRECISIHIGQAGIQVGNACWELYCLEHGIQPDGQMPSDKTVGGGDDAFNTFFSETGAGKHVPRAVFVDLEPTVIDEVRTGTYRQLFHPEQLISGKEDAANNFARGHYTIGKEIVDLCLDRIRKLADNCTGLQGFLVFNAVGGGTGSGLGSLLLERLSVDYGKKSKLGFTVYPSPQVSTSVVEPYNSVLSTHSLLEHTDVAVLLDNEAIYDICRRSLDIERPTYTNLNRLVSQVISSLTASLRFDGALNVDVTEFQTNLVPYPRIHFMLSSYAPVISAEKAYHEQLSVAEITNSAFEPSSMMAKCDPRHGKYMACCLMYRGDVVPKDVNAAVATIKTKRTIQFVDWCPTGFKCGINYQPPTVVPGGDLAKVQRAVCMISNSTSVAEVFSRIDHKFDLMY…	267	56308	11	2
410	523	gi|21436097|gb|AAM51249.1|	putative tubulin alpha-6 chain TUA6 [Arabidopsis thaliana] >gi|7268242|emb|CAB78538.1| tubulin alpha-6 chain (TUA6) [Arabidopsis thaliana] >gi|18958026|gb|AAL79586.1| AT4g14960/dl3520c [Arabidopsis thaliana] >gi|15233627|ref|NP_193232.1| TUA6; struc	MRECISIHIGQAGIQVGNACWELYCLEHGIQPDGQMPGDKTVGGGDDAFNTFFSETGAGKHVPRAVFVDLEPTVIDEVRTGTYRQLFHPEQLISGKEDAANNFARGHYTIGKEIVDLCLDRIRKLADNCTGLQGFLVFNAVGGGTGSGLGSLLLERLSVDYGKKSKLGFTVYPSPQVSTSVVEPYNSVLSTHSLLEHTDVSILLDNEAIYDICRRSLNIERPTYTNLNRLVSQVISSLTASLRFDGALNVDVTEFQTNLVPYPRIHFMLSSYAPVISAEKAFHEQLSVAEITNSAFEPASMMAKCDPRHGKYMACCLMYRGDVVPKDVNAAVGTIKTKRTIQFVDWCPTGFKCGINYQPPTVVPGGDLAKVQRAVCMISNSTSVAEVFSRIDHKFDLMY…	267	56275	11	2
410	523	gi|215767400|dbj|BAG99628.1|	unnamed protein product [Oryza sativa Japonica Group] >gi|215717074|dbj|BAG95437.1| unnamed protein product [Oryza sativa Japonica Group] >gi|108710846|gb|ABF98641.1| Tubulin alpha-1 chain, putative, expressed [Oryza sativa Japonica Group]	MPSDRTVGGGDDAFNTFFSETGAGKHVPRAVFVDLEPTVIDEVRTGCYRQLFHPEQLINGKEDAANNFARGHYTIGKEIVDLCLDRIRKLADNCTGLQGFLVFNAVGGGTGSGLGSLLLERLSVDYGKKSKLGFTVYPSPQVSTSVVEPYNSVLSTHSLLEHTDVAVLLDNEAIYDICRRSLDIERPTYTNLNRLVSQVISSLTASLRFDGALNVDVNEFQTNLVPYPRIHFMLSSYAPVISAEKAYHEQLSVAEITNSAFEPSSMMAKCDPRHGKYMACCLMYRGDVVPKDVNAAVATIKTKRTIQFVDWCPTGFKCGINYQPPSVVPSGDLAKVQRAVCMISNSTSVVEVFSRIDHKFDLMYSKRAFVHWYVGEGMEEGEFSEAREDLAALEKDYEE…	267	52314	11	2
410	523	gi|215767496|dbj|BAG99724.1|	unnamed protein product [Oryza sativa Japonica Group]	MPSDRTVGGGDDAFNTFFSETGAGKHVPRAVFVDLEPTVIDEVRTGCYRQLFHPEQLINGKEDAANNFARGHYTIGKEIVDLCLDRIRKLADNCTGLQGFLVFNAVGGGTGSGLGSLLLERLSVDYGKKSKLGFTVYPSPQVSTSVVEPYNSVLSTHSLLEHTDVAVLLDNEAIYDICRRSLDIERPTYTNLNRLVSQVISSLTASLRFDGALNVDVNEFQTNLVPYPRIHFMLSSYAPVISAEKAYHEQLSVAEITNSAFEPSSMMAKCDPRHGKYMACCLMYRGDVVPKDVNAAVATIKTKRTIQFVDWCPTGFKCGINYQPPSVVPSGDLAKVQRAVCMISNSTSVVEVFSRIDHKFDLMYSKRAFVHWYVGEGMEEGEFSEAREDLAALEKDYEE…	267	52427	11	2
410	523	gi|218202930|gb|ACK76232.1|	alpha-tubulin [Dimocarpus longan]	MRECISIHIGQAGIQVGNACWELYCLEHGTQPDGQMPSDKTVGGGDDAFNTFFSETGAGKHVPRAVFVDLEPTVIDEVRTGTYPQLFHPEQLISGKEDAANNFARGHYTIGKEIVDLCLDRIRKLADNCTGLQGFLVFPRCGGGTGSGLGSLLLERLSVDYGKKSKLGFTVYPSPQVSTSVVEPYNSVLSTHSLLEHTDVAVLLDNEAIYDICRRSLDIERPTYTNLNRLVSQVISSLTASLRFDGAPNVDVTEFQTNLVPYPRIHFMLSSYAPVISAEKAYHEQLSVAEITNSAFEPSSMMAKCDPRHGKYMACCLMYRGDVVPKDVNAAVATIKTKRTIQFVDWCPTGFKCGINYQPPTVVPGGDLAKVQRAVCMISNSTSVAEVFSRIDHKFDLMY…	267	56421	11	2
410	523	gi|22148|emb|CAA33733.1|	alpha2-tubulin [Zea mays] >gi|135411|sp|P14641.1|TBA2_MAIZE RecName: Full=Tubulin alpha-2 chain; AltName: Full=Alpha-2-tubulin	MRECISIHIGQAGIQVGNACWELYCLEHGIQADGQMPGDKTIGGGDDAFNTFFSETGAGKHVPRAVFVDLEPTVIDEVRTGTYRQLFHPEQLISGKEDAANNFARGHYTIGKEIVDLCLDRIRKLADNCTGLQGFLVFNAVGGGTGSGLGSLLLERLSVDYGKKSKLGFTVYPSPQVSTSVVEPYNSVLSTHSLLEHTDVAILLDNEAIYDICRRSLDIERPTYTNLNRLVSQVISSLTASLRFDGALNVDVNEFQTNLVPYPRIHFMLSSYAPVISAEKAYHEQLSVAEITNSAFEPSSMMAKCDPRHGKYMACCLMYRGDVVPKDVNAAVATIKTKRTIQFVDWCPTGFKCGINYQPPSVVPGGDLAKVQRAVCMISNSTSVVEVFSRIDHKFDLMY…	267	56468	11	2
410	523	gi|223453028|gb|ACM89778.1|	alpha-tubulin 6 [Gossypium hirsutum] >gi|134035496|gb|ABO47736.1| alpha-tubulin [Gossypium hirsutum]	MRECISVHIGQAGIQVGNACWELYCLEHGIQPDGQMPSDKTVGGGDDAFNTFFSETGAGKHVPRAVFVDLEPTVIDEVRTGTYRQLFHPEQLISGKEDAANNFARGHYTIGKEIVDLCLDRIRKLADNCTGLQGFLVFNAVGGGTGSGLGSLLLERLSVDYGKKSKLGFTVYPSPQVSTSVVEPYNSVLSTHSLLEHTDVAVLLDNEAIYDICRRSLDIERPTYTNLNRLVSQVISSLTASLRFDGALNVDVTEFQTNLVPYPRIHFMLSSYAPVISAEKAYHEQLSVAEITNSAFEPSSMMAKCDPRHGKYMACCLMYRGDVVPKDVNAAVATIKTKRTIQFVDWCPTGFKCGINYQPPTVVPGGDLAKVQRAVCMISNSTSVAEVFSRIDHKFDLMY…	267	56352	11	2
410	523	gi|223538703|gb|EEF40304.1|	tubulin alpha chain, putative [Ricinus communis] >gi|255562192|ref|XP_002522104.1| tubulin alpha chain, putative [Ricinus communis]	MRECISIHIGQAGIQVGNACWELYCLEHGIQPDGQMPSDKTVGGGDDAFNTFFSETGAGKHVPRAVFVDLEPTVIDEVRTGTYRQLFHPEQLISGKEDAANNFARGHYTIGKEIVDLCLDRIRKLADNCTGLQGFLVFNAVGGGTGSGLGSLLLERLSVDYGKKSKLGFTVYPSPQVSTSVVEPYNSVLSTHSLLEHTDVAVLLDNEAIYDICRRSLDIERPTYTNLNRLVSQVISSLTASLRFDGALNVDVTEFQTNLVPYPRIHFMLSSYAPVISAEKAYHEQLSVAEITNSAFEPSSMMAKCDPRHGKYMACCLMYRGDVVPKDVNAAVATIKTKRTIQFVDWCPTGFKCGINYQPPTVVPGGDLAKVQRAVCMISNSTSVAEVFSRIDHKFDLMY…	267	56280	11	2
410	523	gi|225429189|ref|XP_002275973.1|	PREDICTED: hypothetical protein [Vitis vinifera]	MRECISIHIGQAGIQVGNACWELYCLEHGIQPDGQMPSDKTPGGGDDAFNTFFSETGAGKHVPRAVFVDLEPTVIDEVRTGTYRQLFHPEQLISGKEDAANNFARGHYTIGKEIVDLCLDRIRKLADNCTGLQGFLVFNAVGGGTGSGLGSLLLERLSVDYGKKSKLGFTVYPSPQVSTSVVEPYNSVLSTHSLLEHTDVAVLLDNEAIYDICRRSLDIERPTYTNLNRLVSQVISSLTASLRFDGALNVDVTEFQTNLVPYPRIHFMLSSYAPVISAEKAYHEQLSVAEITNSAFEPSSMMAKCDPRHGKYMACCLMYRGDVVPKDVNAAVATIKTKRTIQFVDWCPTGFKCGINYQPPTVVPGGDLAKVQRAVCMISNSTSVAEVFSRIDHKFDLMY…	267	56292	11	2
410	523	gi|225438188|ref|XP_002263822.1|	PREDICTED: hypothetical protein [Vitis vinifera]	MRECISIHIGQAGIQVGNACWELYCLEHGIQPDGQMPSDKTIGGGDDAFNTFFSETGAGKHVPRAVFVDLEPTVIDEVRTGTYRQLFHPEQLISGKEDAANNFARGHYTIGKEIVDLCLDRIRKLADNCTGLQGFLVFNAVGGGTGSGLGSLLLERLSVDYGKKSKLGFTVYPSPQVSTSVVEPYNSVLSTHSLLEHTDVAVLLDNEAIYDICRRSLDIERPTYTNLNRLVSQVISSLTASLRFDGALNVDVTEFQTNLVPYPRIHFMLSSYAPVISAEKAYHEQLSVAEITNSAFEPSSMMAKCDPRHGKYMACCLMYRGDVVPKDVNAAVATIKTKRTIQFVDWCPTGFKCGINYQPPTVVPGGDLAKVQRAVCMISNSTSVAEVFSRIDHKFDLMY…	267	56379	11	2
410	523	gi|225458970|ref|XP_002285563.1|	PREDICTED: hypothetical protein [Vitis vinifera] >gi|147802483|emb|CAN77412.1| hypothetical protein [Vitis vinifera]	MRECISIHIGQAGIQVGNACWELYCLEHGIQPDGQMPSDKTVGGGDDAFNTFFSETGAGKHVPRAVFVDLEPTVIDEVRTGAYRQLFHPEQLISGKEDAANNFARGHYTIGKEIVDLCLDRIRKLADNCTGLQGFLVFNAVGGGTGSGLGSLLLERLSVDYGKKSKLGFTVYPSPQVSTSVVEPYNSVLSTHSLLEHTDVAVLLDNEAIYDICRRSLDIERPTYTNLNRLVSQVISSLTASLRFDGALNVDVTEFQTNLVPYPRIHFMLSSYAPVISAEKAYHEQLSVAEITNSAFEPSSMMAKCDPRHGKYMACCLMYRGDVVPKDVNAAVATIKTKRTIQFVDWCPTGFKCGINYQPPTVVPGGDLAKVQRAVCMISNSTSVAEVFSRIDNKFDLMY…	267	56328	11	2
410	523	gi|22655354|gb|AAM98269.1|	At1g04820/F13M7_26 [Arabidopsis thaliana] >gi|297309430|gb|EFH39854.1| tubulin alpha-2/alpha-4 chain [Arabidopsis lyrata subsp. lyrata] >gi|16648844|gb|AAL25612.1| At1g04820/F13M7_26 [Arabidopsis thaliana] >gi|297791421|ref|XP_002863595.1| tubulin a	MRECISIHIGQAGIQVGNACWELYCLEHGIQPDGQMPSDKTVGGGDDAFNTFFSETGAGKHVPRAVFVDLEPTVIDEVRTGTYRQLFHPEQLISGKEDAANNFARGHYTIGKEIVDLCLDRIRKLADNCTGLQGFLVFNAVGGGTGSGLGSLLLERLSVDYGKKSKLGFTVYPSPQVSTSVVEPYNSVLSTHSLLEHTDVSILLDNEAIYDICRRSLSIERPTYTNLNRLVSQVISSLTASLRFDGALNVDVTEFQTNLVPYPRIHFMLSSYAPVISAEKAFHEQLSVAEITNSAFEPASMMAKCDPRHGKYMACCLMYRGDVVPKDVNAAVGTIKTKRTIQFVDWCPTGFKCGINYQPPTVVPGGDLAKVQRAVCMISNSTSVAEVFSRIDHKFDLMY…	267	56278	11	2
410	523	gi|255537890|ref|XP_002510010.1|	tubulin alpha chain, putative [Ricinus communis] >gi|223550711|gb|EEF52197.1| tubulin alpha chain, putative [Ricinus communis]	MRECISIHIGQAGIQVGNACWELYCLEHGIQPDGQMPSDKTVGGGDDAFNTFFSETGAGKHVPRAVFVDLEPTVIDEVRTGTYRQLFHPEQLISGKEDAANNFARGHYTIGKEIVDLCLDRIRKLADNCTGLQGFLVFNAVGGGTGSGLGSLLLERLSVDYGKKSKLGFTVYPSPQVSTSVVEPYNSVLSTHSLLEHTDVAVLLDNEAIYDICRRSLDIERPTYTNLNRLVSQVISSLTASLRFDGALNVDVTEFQTNLVPYPRIHFMLSSYAPVISAEKAYHEQLSVAEITNSAFEPSSMMAKCDPRHGKYMACCLMYRGDVVPKDVNAAVATIKTKRTIQFVDWCPTGFKCGINYQPPTVVPGGDLAKVQRAVCMISNSTSVAEVFSRIDHKFDLMY…	267	56365	11	2
410	523	gi|2613143|gb|AAB84298.1|	tubulin [Oryza sativa Indica Group]	MRECISIHIGQAGIQVGNACWELYCLEHGIQADGQMPSDRTVGGGDDAFNTFFSETGAGKHVPRAVFVDLEPTVIDEVRTGLYRQFFHPEQLINGKEDAANNFARGHYTIGKEIVDLCLDRIRKLADNCTGLQGFLVFNAVGGGTGSGLGSLLLERLSVDYGKKSKLGFTVYPSPQVSTSVVEPYNSVLSTHSLLEHTDVAVLLDNEAIYDICRRSLEIERPTYTNLNRLVSQVISSLTASLRFDGALNVDVNEFQTNLVPYPRIHFMLSSYAPVISAEKAYHEQLSVAEITNSAFEPSSMMAKCDPRHGKYMACCLMYRGDVVPKDVNAAVATIKTKRTIQFVDWCPTVFKCGIIYQPSSVVPSGDLAKVQRAVFMISNSTSVVEVFSRIDHKFDLMY…	267	56286	11	2
410	523	gi|293331323|ref|NP_001167663.1|	tubulin alpha-3 chain [Zea mays] >gi|195610154|gb|ACG26907.1| tubulin alpha-3 chain [Zea mays]	MRECISIHIGQAGIQVGNACWELYCLEHGIQADGQMPGDKTIGGGDDAFNTFFSETGAGKHVPRAVFVDLEPTVIDEVRTGTYRQLFHPEQLISGKEDAANNFARGHYTIGKEIVDLCLDRIRKLADNCTGLQGFLVFNAVGGGTGSGLGSLLLERLSVDYGKKSKLGFTVYPSPQVSTSVVEPYNSVLSTHSLLEHTDVAVLLDNEAIYDICRRSLDIERPTYTNLNRLVSQVISSLTASLRFDGALNVDVNEFQTNLVPYPRIHFMLSSYAPVISAEKAYHEQLSVAEITNSAFEPSSMMAKCDPRHGKYMACCLMYRGDVVPKDVNAAVATIKTKRTIQFVDWCPTGFKCGINYQPPSVVPGGDLAKVQRAVCMISNSTSVVEVFSRIDHKFDLMY…	267	56454	11	2
410	523	gi|295389384|dbj|BAJ06362.1|	alpha-tubulin [Alopecurus aequalis]	MRECISIHIGQAGIQVGNACWELYCLEHGIQADGQMPGDKTVGGGDDAFNTFFSETGAGKHVPRAVFVDLEPTVIDEVRTGTYRQLFHPEQLISGKEDAANNFARGHYTIGKEIVDLCLDRIRKLADNCTGLQGFLVFNAVGGGTGSGLGSLLLERLSVDYGKKSKLGFTVYPSPQVSTSVVEPYNSVLSTHSLLEHTDVAVLLDNEAIYDICRRSLDIERPTYTNLNRLVSQVISSLTASLRFDGALNVDVNEFQTNLVPYPRIHFMLSSYAPVISAEKAYHEQLSVAEITNSAFEPSSMMAKCDPRHGKYMACCLMYRGDVVPKDVNAAVATIKTKRTIQFVDWCPTGFKCGINYQPPSVVPGGDLAKVQRAVCMISNSTSVVEVFSRIDHKFDLMY…	267	56440	11	2
410	523	gi|300150708|gb|EFJ17357.1|	hypothetical protein SELMODRAFT_178975 [Selaginella moellendorffii] >gi|302799567|ref|XP_002981542.1| hypothetical protein SELMODRAFT_178975 [Selaginella moellendorffii]	MRECISIHIGQAGIQVGNACWELYCLEHGIQPDGQMPSDKTVGGGDDAFNTFFSETGAGKHVPRAVFVDLEPTVIDEVRTGTYRQLFHPEQLISGKEDAANNFARGHYTIGKEIVDLCLDRIRKLADNCTGLQGFLVFHAVGGGTGSGLGSLLLERLSVDYGKKSKLGFTVYPSPQVSTSVVEPYNSVLSTHSLLEHTDVAVLLDNEAIYDICRRSLDIERPTYTNLNRLVSQVISSLTASLRFDGALNVDVTEFQTNLVPYPRIHFMLSSYAPVISAEKAYHEQLSVAEITNSAFEPSSMMAKCDPRHGKYMACCLMYRGDVVPKDVNAAVATIKTKRTIQFVDWCPTGFKCGINYQPPTVVPGGDLAKVQRAVCMISNSTSVAEVFSRIDHKFDLMY…	267	56202	11	2
410	523	gi|307135957|gb|ADN33817.1|	tubulin alpha chain [Cucumis melo subsp. melo]	MRECISIHIGQAGIQVGNACWELYCLEHGIQPDGQMPGDTTLGGGDDAFNTFFSETGAGKHVPRAVFVDLEPTVIDEVRTGTYRQLFHPEQLISGKEDAANNFARGHYTVGKEIVDLCLDRIRKLADNCTGLQGFLVFNAVGGGTGSGLGSLLLERLSVDYGKKSKLGFTVYPSPQVSTSVVEPYNSVLSTHSLLEHTDVAVLLDNEAIYDICRRSLDIERPNYSNLNRLVSQVISSLTASLRFDGALNVDVNEFQTNLVPYPRIHFMLSSYAPVISAEKAYHEQLSVAEITNSAFEPSSMMVKCDPRHGKYMACCLMYRGDVVPKDVNAAVATIKTKRTIQFVDWCPTGFKCGINYQPPTVVPGGDLARVQRAVCKISNSTSVAEVFSRIDHKFDLMY…	267	56011	11	2
410	523	gi|3163944|emb|CAA06618.1|	alpha-tubulin 1 [Eleusine indica] >gi|2511531|gb|AAC05717.1| alpha tubulin 1 [Eleusine indica] >gi|6094429|sp|O22347.1|TBA1_ELEIN RecName: Full=Tubulin alpha-1 chain; AltName: Full=Alpha-1-tubulin	MRECISIHIGQAGIQVGNACWELYCLEHGIQADGQMPGDKTIGGGDDAFNTFFSETGAGKHVPRAVFVDLEPTVIDEVRTGTYRQLFHPEQLISGKEDAANNFARGHYTIGKEIVDLCLDRIRKLADNCTGLQGFLVFNAVGGGTGSGLGSLLLERLSVDYGKKSKLGFTVYPSPQVSTSVVEPYNSVLSTHSLLEHTDVAVLLDNEAIYDICRRSLDIERPTYTNLNRLVSQVISSLTASLRFDGALNVDVNEFQTNLVPYPRIHFMLSSYAPVISAEKAYHEQLSVAEITNSAFEPSSMMAKCDPRHGKYMACCLMYRGDVVPKDVNAAVATIKTKRTIQFVDWCPTGFKCGINYQPPSVVPGGDLAKVQRAVCMISNSTSVVEVFSRIDHKFDLMY…	267	56468	11	2
410	523	gi|34733239|gb|AAQ81585.1|	putative tubulin alpha-2/alpha-4 chain [Brassica napus]	MGECISIHMGQAGIQVGNACWELYCLEHGIQPDGQMPGDKTVGGGDDAFNTFFSETGAGKHVPRAVFVDLEPTVIDEVRTGTYRQLFHPEQLISGKEDAANNFARGHYTIGKEIVDLCLDRIRKLADNCTGLQGFLVFNAVGGGTGSGLGSLLLERLSVDYGKKSKLGFTVYPSPQVSTSVVEPYNSVLSTHSLLEHTDVSILLDNEAIYDICRRSLNIERPTYTNLNRLVSQVISSLTASLRFDGALNVDVTEFQTNLVPYPRIHFMLSSYAPVISAEKAFHEQLSVAEITNSAFEPASMMAKCDPRHGKYMACCLMYRGDVVPKDVNAAVGTIKTKRTIQFVDWCPTGFKCGINYQPPTVVPGGDLAKVQRAVCMISNSTSVAEVFPRIDHKFDLMY…	267	56174	11	2
410	523	gi|4165488|emb|CAA10663.1|	alpha-tubulin 3 [Hordeum vulgare subsp. vulgare] >gi|90289606|gb|ABD92935.1| alpha tubulin-3D [Triticum aestivum] >gi|8928432|sp|Q9ZRR5.1|TBA3_HORVU RecName: Full=Tubulin alpha-3 chain >gi|90289602|gb|ABD92933.1| alpha tubulin-3B [Triticum aestivum]	MRECISIHIGQAGIQVGNACWELYCLEHGIQPDGQMPGDKTVGGGDDAFNTFFSETGAGKHVPRAVFVDLEPTVIDEVRTGTYRQLFHPEQLISGKEDAANNFARGHYTIGKEIVDLCLDRIRKLADNCTGLQGFLVFNAVGGGTGSGLGSLLLERLSVDYGKKSKLGFTVYPSPQVSTSVVEPYNSVLSTHSLLEHTDVAVLLDNEAIYDICRRSLDIERPTYTNLNRLVSQVISSLTASLRFDGALNVDVNEFQTNLVPYPRIHFMLSSYAPVISAEKAYHEQLSVAEITNSAFEPSSMMAKCDPRHGKYMACCLMYRGDVVPKDVNAAVATIKTKRTIQFVDWCPTGFKCGINYQPPSVVPGGDLAKVQRAVCMISNSTSVVEVFSRIDHKFDLMY…	267	56466	11	2
410	523	gi|51988174|emb|CAE52515.1|	alpha tubulin [Setaria viridis]	MRECISIHIGQAGIQVGNACWELYCLEHGIQADGQMPGDKTVGGGDDAFNTFFSETGAGKHVPRAVFVDLEPTVIDEVRTGTYRQLFHPEQLISGKEDAANNFARGHYTIGKEIVDLCLDRIRKLADNCTGLQGFLVFNAVGGGTGSGLGSLLLERLSVDYGKKSKLGFTVYPSPQVSTSVVEPYNSVLSTHSLLEHTDVAVLLDNEAIYDICRRSLDIERPTYTNLNRLVSQVISSLTASLRFDGALNVDVNEFQTNLVPYPRIHFMLSSYAPVISAEKAYHEQLSVAEITNSAFEPSSMMAKCDPRHGKYMACCLMYRGDVVPKDVNAAVATIKTKRTIQFVDWCPTGFKCGINYQPPSVVPGGDLAKVQRAVCMISNSTSVVEVFSRIDHKFDLMY…	267	56454	11	2
410	523	gi|525332|gb|AAA79910.1|	alpha-tubulin [Pisum sativum] >gi|1174592|sp|P46259.1|TBA1_PEA RecName: Full=Tubulin alpha-1 chain	MRECISIHIGQAGIQVGNACWELYCLEHGIQPDGQMPGDKTVGGGDDAFNTFFSETGAGKHVPRAVFVDLEPTVIDEVRTGAYRQLFHPEQLISGKEDAANNFARGHYTIGKEIVDLCLDRIRKLADNCTGLQGFLVFNAVGGGTGSGLGSLLLERLSVDYGKKSKLGFTVYPSPQVSTSVVEPYNSVLSTHSLLEHTDVAVLLDNEAIYDICRRSLDIERPTYTNLNRLVSQVISSLTASLRFDGALNVDVTEFQTNLVPYPRIHFMLSSYAPVISAEKAYHEQLSVAEITNSAFEPSSMMAKCDPRHGKYMACCLMYRGDVVPKDVNAAVATIKTKRTIQFVDWCPTGFKCGINYQPPTVVPGGDLAKVQRAVCMISNSTSVAEVFSRIDHKFDLMY…	267	56390	11	2
410	523	gi|54036492|sp|Q6VAF9.1|TBA4_GOSHI	RecName: Full=Tubulin alpha-4 chain; AltName: Full=Alpha-4-tubulin >gi|37529490|gb|AAQ92663.1| alpha-tubulin 4 [Gossypium hirsutum]	MRECISIHIGQAGIQVGNACWELYCLEHGIQPDGQMPSDKTVGGGDDAFNTFFSETGAGKHVPRAVFVDLEPTVIDEVRTGAYRQLFHPEQLISGKEDAANNFARGHYTIGKEIVDLCLDRIRKLADNCTGLQGFLVFNAVGGGTGSGLGSLLLERLSVDYGKKSKLGFTVYPSPQVSTSVVEPYNSVLSTHSLLEHTDVAVLLDNEAIYDICRRSLDIERPTYTNLNRLVSQVISSLTASLRFDGALNVDVTEFQTNLVPYPRIHFMLSSYAPVISAEKAYHEQLSVAEITNSAFEPSSMMAKCDPRHGKYMACCLMYRGDVVPKDVNAAVATIKTKRTIQFVDWCPTGFKCGINYQPPTVVPGGDLAKVQRAVCMISNSTSVAEVFSRIDHKFDLMY…	267	56308	11	2
410	523	gi|56481455|gb|AAV92358.1|	alpha tubulin 1 [Pseudotsuga menziesii var. menziesii] >gi|224286291|gb|ACN40854.1| unknown [Picea sitchensis] >gi|224285895|gb|ACN40661.1| unknown [Picea sitchensis] >gi|56481445|gb|AAV92353.1| alpha tubulin 1 [Pseudotsuga menziesii var. menziesii]	MRECISIHIGQAGIQVGNACWELYCLEHGIQPDGQMPSDKTVGGGDDAFNTFFSETGAGKHVPRAVFVDLEPTVIDEVRTGTYRQLFHPEQLISGKEDAANNFARGHYTIGKEIVDLCLDRIRKLADNCTGLQGFLVFNAVGGGTGSGLGSLLLERLSVDYGKKSKLGFTVYPSPQVSTSVVEPYNSVLSTHSLLEHTDVAVLLDNEAIYDICRRSLDIERPTYTNLNRLVSQVISSLTASLRFDGALNVDVTEFQTNLVPYPRIHFMLSSYAPVISAEKAYHEQLSVAEITNSAFEPSSMMAKCDPRHGKYMACCLMYRGDVVPKDVNAAVATIKTKRTIQFVDWCPTGFKCGINYQPPTVVPGGDLAKVQRAVCMISNSTSVAEVFSRIDHKFDLMY…	267	56379	11	2
410	523	gi|6723478|emb|CAB66336.1|	alpha-tubulin [Betula pendula]	MRECISIHIGQAGIQVGNACWELYCLEHGIKPDGQMPSDKTVGGGDDAFNTFFSETGAGKHVPRAVFVDLEPTVIDEVRTGAYRQLFHPEQLISGKEDAANNFARGHYTIGKEIVDLCLDRIRKLADNCTGLQGFLVFNAVGGGTGSGLGSLLLERLSVDYGKKSKLGFTVYPSPQVSTSVVEPYNSVLSTHSLLEHTDVAVLLDNEAIYDICRRSLDIERPTYTNLNRLVSQVISSLTASLRFDGALNVDVTEFQTNLVPYPRIHFMLSSYAPVISAEKAYHEQLSVAEITNSAFEPSSMMAKCDPRHGKYMACCLMYRGDVVPKDVNAAVATIKTKRTIQFVDWCPTGFKCGINYQPPTVVPGGDLAKVQRAVCMISNSTSVAEVFSRIDNKFDLMY…	267	56616	11	2
410	523	gi|8928408|sp|Q9ZRB7.1|TBA_WHEAT	RecName: Full=Tubulin alpha chain >gi|4098272|gb|AAD10486.1| alpha-tubulin [Triticum aestivum]	MRECISIHIGQAGIQVGNACWELYCLEHGIQPDGQMPGDKTVGGGDDAFNTFFSETGAGKHVPRAVFVDLEPTVIDEVRTGAYRQLFHPEQLISGKEDAANNFARGHYTIGKEIVDLCLDRIRKLSDNCTGLQGFLVFNAVGGGTGSGLGSLLLERLSVDYGRKSKLGFTVYPSPQVSTSVVEPYNSVLSTHSLLEHTDVSILLDNEAIYDICRRSLDIERPTYTNLNRLVSQVISSLTASLRFDGALNVDVNEFQTNLVPYPRIHFMLSSYAPVISAEKAYHEQLSVAEITNSAFEPSSMMAKCDPRHGKYMACCLMYRGDVVPKDVNAAVATIKTKRTIQFVDWCPTGFKCGINYQPPGVVPGGDLAKVQRAVCMISNSTSVVEVFSRIDHKFDLMY…	267	56176	11	2
410	523	gi|8928422|sp|Q96460.1|TBA2_HORVU	RecName: Full=Tubulin alpha-2 chain >gi|1619297|emb|CAA69724.1| alpha-tubulin 2 [Hordeum vulgare subsp. vulgare]	MRECISIHIGQAGIQVGNACWELYCLEHGIQPDGQMPGDKTVGGGDDAFNTFFSETGAGKHVPRAVFVDLEPTVIDEVRTGAYRQLFHPEQLISGKEDAANNFARGHYTIGKEIVDLCLDRIRKLSDNCTGLQGFLVFNAVGGGTGSGLGSLLLERLSVDYGKKSKLGFTVYPSPQVSTSVVEPYNSVLSTHSLLEHTDVSILLDNEAIYDICRRSLDIERPTYTNLNRLVSQVISSLTASLRFDGALNVDVNEFQTNLVPYPRIHFMLSSYAPVISAEKAYHEQLSVAEITNSAFEPSSMMAKCDPRHGKYMACCLMYRGDVVPKDVNAAVATIKTKRTIQFVDWCPTGFKCGINYQPPGVVPGGDLAKVQRAVCMISNSTSVVEVFSRIDHKFDLMY…	267	56438	11	2
410	523	gi|90289600|gb|ABD92932.1|	alpha tubulin-2B [Triticum aestivum] >gi|90289596|gb|ABD92930.1| alpha tubulin-2A [Triticum aestivum] >gi|90289598|gb|ABD92931.1| alpha tubulin-2D [Triticum aestivum]	MRECISIHIGQAGIQVGNACWELYCLEHGIQPDGQMPGDKTVGGGDDAFNTFFSETGAGKHVPRAVFVDLEPTVIDEVRTGAYRQLFHPEQLISGKEDAANNFARGHYTIGKEIVDLCLDRIRKLSDNCTGLQGFLVFNAVGGGTGSGLGSLLLERLSVDYGKKSKLGFTVYPSPQVSTSVVEPYNSVLSTHSLLEHTDVSILLDNEAIYDICRRSLDIERPTYTNLNRLVSQVISSLTASLRFDGALNVDVNEFQTNLVPYPRIHFMLSSYAPVISAEKAYHEQLSVAEITNSAFEPSSMMAKCDPRHGKYMACCLMYRGDVVPKDVNAAVATIKTKRTIQFVDWCPTGFKCGINYQPPGVVPGGDLAKVQRAVCMISNSTSVVEVFSRIDHKFDLMY…	267	56452	11	2
410	523	gi|99082883|gb|ABC59068.2|	alpha tubulin 1 [Camellia sinensis]	MREFISIHIGQAGIQVGNACWELYCLEHGIQPDGQMPGDKNVGGGDDAFNTFFSETGAGKHVPRAVFVDLEPTVIDEVRTGTYRQLFHPEQLIIVKEDAANNFARGHYTIGKEIVDLCLDRIRKLADNCTGLQGFLVFNAVGGGTGSGLGSLLLESLSVDYGKKSKLGFTVYPSPQVSTSVVEPYNSVLSTHSLLEHTDVSILLDNEAIYDICRRSLDIERPTYTNLNRLVSQVISSLTASLRFDGALNVDVNEFQTNLVPYPRIHFMLSSYAPVISAEKAYHEQLSVAEITNSAFEPSSMMVKCDPRHGKYMACCLMYRGDVVPKDVNAAVATIKTKRTIQFVDWCPTGFKCGINYQPPTVVPGGDLAKVQRAVCMISNSTSVAEVFSRIDHKFDLMY…	267	56348	11	2
431	546	gi|2982322|gb|AAC32146.1|	probable proteasome subunit [Picea mariana] >gi|17380183|sp|O65084.1|PSB3_PICMA RecName: Full=Proteasome subunit beta type-3; AltName: Full=20S proteasome alpha subunit C; AltName: Full=20S proteasome subunit beta-3 >gi|116784298|gb|ABK23292.1| unkn	MSIFEYNGSALVAMVGKNCFAIASDRRLGVQLQTIATDFQRIFKIHDKLYVGLSGLATDVQTLYQRFAFRHKLYQLREERNMRPETFASLVSALLYEKRFGPYFCQPVIAGLGEDDKPFICTMDSIGAKELAKDFVVAGTAAESLYGACESMYKPDMEPEELFETISQALLSSIDRDCLSGWGGHVYVVSPNQVIERTLKGRMD	253	26525	6	1	---		---		---		---		---		---		---
435	550	gi|1346735|sp|P35493.2|PMGI_RICCO	RecName: Full=2,3-bisphosphoglycerate-independent phosphoglycerate mutase; Short=BPG-independent PGAM; Short=Phosphoglyceromutase; AltName: Full=PGAM-I >gi|474170|emb|CAA49995.1| phosphoglycerate mutase [Ricinus communis]	GEFTWKLADHPKLPKGKTIAMVVLDGWGEAKPDQYNCIHVAETPTMDSFKKTAPERWRLIKAHGTAVGLPTEDDMGNSEVGHNALGAGRIYAQGAKLVDLALASGKIYEGEGFKYVKECFDKGTLHLIGLLSDGGVHSRLDQLQLLLKGAAEHGAKRIRVHVLTDGRDVIDGTSVGFAETLEKDLENLREKGVDAQVASGGGRMYVTMDRYENDWNVVKRGWDAQVLGEAPYKFKSAVEAIKKLREEPKANDQYLPPFVIVDENGKPVGPIVDGDAVVTINFRADRMVMLAKALEYENFDTFDRVRFPKIHYAGMLQYDGELKLPSHYLVSPPEIERTSGEYLVHNGVHTFACSETVKFGHVTFFWNGNRSGYFNPEMEEYVEIPSDVGITFNVQPKMK…	251	73176	10	2	3.384	*	2.428		2.639	*	5.856	*	1.327		1.28		0.942
435	550	gi|219730980|emb|CAW45716.1|	unnamed protein product [Ricinus communis] >gi|257354442|emb|CBC11219.1| unnamed protein product [Ricinus communis]	MGEFTWKLADHPKLPKGKTIAMVVLDGWGEAKPDQYNCIHVAETPTMDSFKKTAPERWRLIKAHGTAVGLPTEDDMGNSEVGHNALGAGRIYAQGAKLVDLALASGKIYEGEGFKYVKECFDKGTLHLIGLLSDGGVHSRLDQLQLLLKGAAEHGAKRIRVHVLTDGRDVIDGTSVGFAETLEKDLENLREKGVDAQVASGGGRMYVTMDRYENDWNVVKRGWDAQVLGEAPYKFKSAVEAIKKLREEPKANDQYLPPFVIVDENGKPVGPIVDGDAVVTINFRADRMVMLAKALEYENFDTFDRVRFPKIHYAGMLQYDGELKLPSHYLVSPPEIERTSGEYLVHNGVHTFACSETVKFGHVTFFWNGNRSGYFNPEMEEYVEIPSDVGITFNVQPKM…	251	73307	10	2
435	550	gi|223540739|gb|EEF42299.1|	2,3-bisphosphoglycerate-independent phosphoglycerate mutase [Ricinus communis] >gi|255557893|ref|XP_002519975.1| 2,3-bisphosphoglycerate-independent phosphoglycerate mutase [Ricinus communis]	MGSSGEFTWKLADHPKLPKGKTIAMVVLDGWGEAKPDQYNCIHVAETPTMDSFKKTAPERWRLIKAHGTAVGLPTEDDMGNSEVGHNALGAGRIYAQGAKLVDLALASGKIYEGEGFKYVKECFDKGTLHLIGLLSDGGVHSRLDQLQLLLKGAAEHGAKRIRVHVLTDGRDVIDGTSVGFAETLEKDLENLREKGVDAQVASGGGRMYVTMDRYENDWNVVKRGWDAQVLGEAPYKFKSAVEAIKKLREEPKANDQYLPPFVIVDENGKPVGPIVDGDAVVTINFRADRMVMLAKALEYENFDTFDRVRFPKIHYAGMLQYDGELKLPSHYLVSPPEIERTSGEYLVHNGVHTFACSETVKFGHVTFFWNGNRSGYFNPEMEEYVEIPSDVGITFNVQ…	251	73552	10	2
436	551	gi|302399079|gb|ADL36834.1|	TCP domain class transcription factor [Malus x domestica]	MAVERIFKDEASEEKGERARLASFVGAIAIADLVKTTLGPKGMDKILQSTGRGHAVTVTNDGATILKSLHIDNAAAKVLVDISKVQDDEVGDGTTSVVVLAGELLREAEKLVASKIHPMTIISGYRMAAECARDALLRKVVDNKADSEKFKSDLMKIAMTTLSSKILSQDKEHFAQLAVDAVMRLKGSTNLEAIQIIKKPGGSLIDSFLDEGFILDKKIGLGQPKRIENANILVANTAMDTDKVKIYGARVRVDSMAKVAEIEGAEKDKMREKVQKIIGHGINCFVNRQLIYNFPEELFADAGILAIEHADFDGIERLALVTGGEIASTFDNPESVKLGHCKLIEEIMIGEDKLIHFSGVELGQACTIVLRGASHHVLDEAERSLHDALCVLSQTVNDS…	251	70455	4	4	0.955		1.006		0.712	*	1.085		1.266		0.815	*	0.805
444	561	gi|212722842|ref|NP_001131288.1|	hypothetical protein LOC100192601 [Zea mays] >gi|194691090|gb|ACF79629.1| unknown [Zea mays]	MADQLTDDQIAEFKEAFSLFDKDGDGCITTKELGTVMRSLGQNPTEAELQDMINEVDADGNGTIDFPEFLNLMARKMKDTDSEEELKEAFRVFDKDQNGFISAAELRHVMTNLGEKLTDEEVDEMIREADVDGDGQINYEEFVKVMMAKAAPAQEQQANGNGNGEQKTRHSEVGHKSLLKSDDLYQYILDTSVYPREPESMKELREITAKHPWNLMTTSADEGQFLNMLIKLIGAKKTMEIGVYTGYSLLATALALPEDGTILAMDINRENYELGLPCINKAGVGHKIDFREGPALPVLDDLVADKEQHGSFDFAFVDADKDNYLSYHERLLKLVRPGGLIGYDNTLWNGSVVLPDDAPMRKYIRFYRDFVLALNSALAADDRVEICQLPVGDGVTLCR…	246	53110	9	6	1.09	*	6.664		0.823		1.339		1.775		1.872		1.301	*
445	562	gi|283146497|gb|ADB13189.1|	cytosolic glyceraldehyde-3-phosphate dehydrogenase [Rosmarinus officinalis]	APMFVVGVNEKEYKPELDIVSNASCTTNCLAPLAKVINDRFGIVEGLMTTVHSITATQKTVDGPSSKDWRGGRAASFNIIPSSTGAAR	246	11244	11	1	---		---		---		---		---		---		---
446	563	gi|226320258|gb|ACO48250.1|	phosphoenolpyruvate carboxylase [Arachis hypogaea]	MATKKVEKMASIDAQLRLLAPSKVSDDDKLVEYDALLLDRFLDILQDLHGLDIRETVQDCYELSAEYEGENDPHKLEELGNMLTGLDAGDSIVVAKSFSHMLNLANLAEEVQIAYRRRIKLLKKGDFVDENSAITESDLEETFKRLVNQMNKTPQEVFDALKNQTVDLVLTAHPTQSVRRSLLQKHGRIRNCLTQLYAKDITPDDRQELDEALQREIQAAFRTDEIRRTPPTPQDEMRAGMSYFHETIWKGIPKFLRRVDTALKNIGINERVPYSAPVIQFSSWMGGDRDGNPRVTPEVTRDVCLLARMMAANLYFSQIEDLMFELSMWRCSDELRVHVDELLRSSKSDAKHYIEFWKQVPPNEPYRVILGDVRDKLYNTREHARQLLANGTSEIPEET…	245	127356	13	1	---		---		---		---		---		---		---
447	564	gi|255638991|gb|ACU19796.1|	unknown [Glycine max]	MAQPSSSSKPVVPLLKDELDIVIPTIRNLDFLEMWRPFFEPYHLIIVQDGDPNRTINVPEGFDYELYNRNDINRILGPKASCISVKDSACRCFGYMVSKKKYIYTIDDDCFVAKDPSGKDINALEQHIKNLLCPSTPFFFNTLYDPYREGADFVRGYPFSLREGAPTAVSHGLWLNIPDYDAPTQLVKPLERNTRYVDAVLTIPKGTLFPMCGMNLAFDRQLIGPAMYFGLMGDGQPIGRYDDMWAGWCVKVICDHLGLGVKTGLPYIWHSKASNPFVNLKKEYKGIFWQEEIIPFFQSATLSKECTSVQKKKKK	245	43989	11	7	3.778	*	0.857	*	1.127		2.078		0.618	*	0.677	*	0.496	*
451	568	gi|118488483|gb|ABK96055.1|	unknown [Populus trichocarpa]	MAGAASSSSSSLISTGFLLCHFPQFPKKKATTLALSSKSHNNKIFIHNHKQHKLAVNTTTTTKLLRDSFLVVCTSVALSFSLLIGDVDSSALAFVITTTTPRKLQSDELATVRLFQENTPSVVYITNLAVRQDAFTLDVLEVPQGSGSGFVWDNDGHVVTNYHVIRGASDLKVTLADQSTYDAKVVGFDQDKDVAVLRVDAPKDKLRPIPVGVSADLLVGQKVFAIGNPFGLDHTLTTGVISGLRREISSAATGRPIQDVIQTDAAINPGNSGGPLLDSSGSLIGINTAIYSPSGASSGVGFSIPVDTVSGIVDQLVRFGKVTRPILGIKFAPDQSVEQLGVSGVLVLDAPTNGPAGKAGLQPTKRDAYGRLILGDIITSVNGKKVTNGSDLYRILDQC…	243	53407	5	5
451	568	gi|215692515|dbj|BAG87935.1|	unnamed protein product [Oryza sativa Japonica Group] >gi|115465521|ref|NP_001056360.1| Os05g0568900 [Oryza sativa Japonica Group] >gi|51854294|gb|AAU10675.1| putative DegP protease [Oryza sativa Japonica Group] >gi|215767869|dbj|BAH00098.1| unnamed	MAAASSSAAACFLSPSPPPRPRHHSIKHLACAASRSPSPGPSSSRSLALPSPSASASPWPWPRRLRDLLPDETGRILSSATGSLIVALASAALILGDAGSASAFVVATPRKLQADELATVRLFQENTPSVVYITNLAVRQDAFTLDVLEVPQGSGSGFVWDKSGHIVTNFHVIRGASDLRVTLADQTVYEAQVVGFDQDKDVAVLRIKAPTDKLRPVPVGVSADLLVGQKVFAIGNPFGLDHTLTTGVISGLRREISSAATGRPIQDVIQTDAAINPGNSGGPLLDSSGNLIGVNTAIYSPSGASSGVGFSIPVDTVGGIVDQLIKFGKVTRPILGIKFAPDQSVEQLGLSGVLVLDAPPNGPAGKAGLQSTKRDSYGRLILGDIITSVNGTKVTNGSD…	243	51453	5	5
451	568	gi|218197290|gb|EEC79717.1|	hypothetical protein OsI_21033 [Oryza sativa Indica Group]	MAAASSSAAACFLSPSPPPPPRHHSIKHLACAASRSPSPGPSSSRSLALPSPSASASPSPWPRRLRDLLPDETGRILSSATGSLIVALASAALILGDAGSASAFVVATPRKLQADELATVRLFQENTPSVVYITNLAVRQDAFTLDVLEVPQGSGSGFVWDKSGHIVTNFHVIRGASDLRVTLADQTVYEAQVVGFDQDKDVAVLRIKAPTDKLRPIPVGVSADLLVGQKVFAIGNPFGLDHTLTTGVISGLRREISSAATGRPIQDVIQTDAAINPGNSGGPLLDSSGNLIGVNTAIYSPSGASSGVGFSIPVDTVGGIVDQLIKFGKVTRPILGIKFAPDQSVEQLGLSGVLVLDAPPNGPAGKAGLQSTKRDSYGRLILGDIITSVNGTKVTNGSD…	243	51309	5	5
451	568	gi|22331378|ref|NP_189431.2|	DEGP1 (DegP protease 1); serine-type endopeptidase/ serine-type peptidase [Arabidopsis thaliana] >gi|11994498|dbj|BAB02539.1| DegP protease precursor [Arabidopsis thaliana] >gi|14517500|gb|AAK62640.1| K16N12.18/K16N12.18 [Arabidopsis thaliana] >gi|2	MATTTSCSLLLSSTLFLHSPPSSHLSFFNLSSSRSSPISLYPIRSKRYFRILSKLSLNDNNRDDDDDTLHFTPFSAVKPFFLLCTSVALSFSLFAASPAVESASAFVVSTPKKLQTDELATVRLFQENTPSVVYITNLAVRQDAFTLDVLEVPQGSGSGFVWDKQGHIVTNYHVIRGASDLRVTLADQTTFDAKVVGFDQDKDVAVLRIDAPKNKLRPIPVGVSADLLVGQKVFAIGNPFGLDHTLTTGVISGLRREISSAATGRPIQDVIQTDAAINPGNSGGPLLDSSGTLIGINTAIYSPSGASSGVGFSIPVDTVGGIVDQLVRFGKVTRPILGIKFAPDQSVEQLGVSGVLVLDAPPSGPAGKAGLQSTKRDGYGRLVLGDIITSVNGTKVSNG…	243	53205	5	5
451	568	gi|224060070|ref|XP_002300036.1|	predicted protein [Populus trichocarpa] >gi|222847294|gb|EEE84841.1| predicted protein [Populus trichocarpa]	FLVVCTSVALSFSLLIGDVDSSALAFVITTTTPRKLQSDELATVRLFQENTPSVVYITNLAVRQDAFTLDVLEVPQGSGSGFVWDNDGHVVTNYHVIRGASDLKVTLADQSTYDAKVVGFDQDKDVAVLRVDAPKDKLRPIPVGVSADLLVGQKVFAIGNPFGLDHTLTTGVISGLRREISSAATGRPIQDVIQTDAAINPGNSGGPLLDSSGSLIGINTAIYSPSGASSGVGFSIPVDTVSGIVDQLVRFGKVTRPILGIKFAPDQSVEQLGVSGVLVLDAPTNGPAGKAGLQPTKRDAYGRLILGDIITSVNGKKVTNGSDLYRILDQCKVGEQVTVEVLRGDHKEKIPVILESKADES	243	43558	5	5
451	568	gi|2565436|gb|AAC39436.1|	DegP protease precursor [Arabidopsis thaliana]	MATTTSCSLLLHSPPSSQLSNSTSFFNLSSSRSSPVSLYPIRSKRYFRILSKLPLNDNNGDDDGDTLLLTPFSAVKPFFLLCTSVALSFSLFAASPAVESASAFVVSTPKKLQTDELATVRLFQENTPSVVYITNLAVRQDAFTLDVLEVPQGSGSGFVWDKQGHIVTNYHVIRGASDLRVTLADQTTFDAKVVGFDQDKDVAVLRIDAPKNKLRPIPVGVSADLLVGQKVFAIGNPFGLDHTLTTGVISGLRREISSAATGRPIQDVIQTDAAINPGNSGGPLLDSSGTLIGINTAIYSPSGASSGVGFSIPVDTVGGIVDQLVRFGKVTRPILGIKFAPDQSVEQLGVSGVLLLDAPPSGPAGKAGLQSTKRDGYGRLILGDIITSVNGTKVSNGSD…	243	52745	5	5
451	568	gi|297818398|ref|XP_002877082.1|	hypothetical protein ARALYDRAFT_484581 [Arabidopsis lyrata subsp. lyrata] >gi|297322920|gb|EFH53341.1| hypothetical protein ARALYDRAFT_484581 [Arabidopsis lyrata subsp. lyrata]	MATTTSCSLLLSSTLFLHSPPSSHLSFFNLSSSRSSPISLYPIRSKRYFRILSKLPLNDSNNDDDTLLLPPFSAVKPFFLLCTSVALSFSLFAASPSSAFVVSTPRKLQTDELATVRLFQENTPSVVYITNLAVRQDAFTLDVLEVPQGSGSGFVWDKQGHIVTNYHVIRGASDLRVTLADQTTFDAKVVGFDQDKDVAVLRIDAPKNKLRPIPIGVSADLLVGQKVFAIGNPFGLDHTLTTGVISGLRREISSAATGRPIQDVIQTDAAINPGNSGGPLLDSSGTLIGINTAIYSPSGASSGVGFSIPVDTVGGIVDQLVRFGKVTRPILGIKFAPDQSVEQLGVSGVLVLDAPPSGPAGKAGLQSTKRDGYGRLILGDIITSVNGTKVSNGSDLYRI…	243	52247	5	5
473	593	gi|105873020|gb|ABF74733.1|	ADP-ribosylation factor 1 [Nicotiana benthamiana]	MGLTFTKLFSRLFAKKEMRILMVGLDAAGKTTILYKLKLGEIGTTIPTIGFNVETVEYKNISFTVWDVGGQDKIRPLWRHYFQNTQGLIFVVDSNDRDRVVEARDELHRMLNEDELRDAVLLVFANKQDPPNAMNAAEITDKLGLHSLRQRHWYIQSTCATSGEGLYEGLDWLSNNIANKS	232	24346	7	4
473	593	gi|108711705|gb|ABF99500.1|	ADP-ribosylation factor, putative, expressed [Oryza sativa Japonica Group] >gi|108711709|gb|ABF99504.1| ADP-ribosylation factor, putative, expressed [Oryza sativa Japonica Group] >gi|115456151|ref|NP_001051676.1| Os03g0811900 [Oryza sativa Japonica	MGLTFTKLFSRLFAKKEMRILMVGLDAAGKTTILYKLKLGEIVTTIPTIGFNVETVEYKNISFTVWDVGGQDKIRPLWRHYFQNTQGLIFVVDSNDRDRVVEARDELHRMLNEDELRDAVLLVFANKQDLPNAMNAAEITDKLGLHSLRQRHWYIQSTCATTGEGLYEGLDWLSSNIASKA	232	24348	7	4
473	593	gi|108711707|gb|ABF99502.1|	ADP-ribosylation factor, putative, expressed [Oryza sativa Japonica Group]	MGLTFTKLFSRLFAKKEMRILMVGLDAAGKTTILYKLKLGEIVTTIPTIGFNVETVEYKNISFTVWDVGGQDKIRPLWRHYFQNTQGLIFVVDSNDRDRVVEARDELHRMLNEDELRDAVLLVFANKQDLPNAMNAAEITDKLGLHSLRQRHCTHLNFLIWLTGISRALVLQQVRDCTRAWTGCPATLPARPKF	232	26051	7	4
473	593	gi|11131026|sp|O48920.3|ARF_VIGUN	RecName: Full=ADP-ribosylation factor >gi|2689631|gb|AAB91395.1| ADP-ribosylation factor [Vigna unguiculata]	MGLSFTKLFSRLFAKKEMRILMVGLDAAGKTTILYKLKLGEIVTTIPTIGFNVETVEYKNISFTVWDVGGQDKIRPLWRHYFQNTQGLIFVVDSNDRDRVVEARDELHRMLNEDELRDAVLLVFANKQDLPNAMNAAEITDKLGLHSLRQRHWYIQSTCATSGEGLYEGLEWLSNNIASKA	232	24361	7	4
473	593	gi|113610743|dbj|BAF21121.1|	Os07g0223400 [Oryza sativa Japonica Group] >gi|215768998|dbj|BAH01227.1| unnamed protein product [Oryza sativa Japonica Group] >gi|215769406|dbj|BAH01635.1| unnamed protein product [Oryza sativa Japonica Group] >gi|218199318|gb|EEC81745.1| hypotheti	MGLAFGKLFSRLFAKKEMRILMVGLDAAGKTTILYKLKLGEIVTTIPTIGFNVETVEYKNISFTVWDVGGQDKIRPLWRHYFQNTQGLIFVVDSNDRDRVVEARDELHRMLNEDELRDAVLLVFANKQDLPNAMNAAEITDKLGLHSLRQRHWYIQSTCATTGEGLYEGLDWLSSNIASKA	232	24274	7	4
473	593	gi|125525297|gb|EAY73411.1|	hypothetical protein OsI_01294 [Oryza sativa Indica Group] >gi|125569828|gb|EAZ11343.1| hypothetical protein OsJ_01211 [Oryza sativa Japonica Group]	MGLTFTKLFSRLFSKKEMRILMVGLDAAGKTTILYKLKLGEIVTTIPTIGFNVETVEYKNISFTVWDVGGQDKIRPLWRHYFQNTQGLIFVVDSNDRDRVVEARDELHRMLNEDELRDAVLLVFANKQDLPNAMNAAEITDKLGLHSLRQRHWYIQSTCATTGEGLYEGLDWLSSNIANKYLSRSHLSIDCRPDWMTRIPHYIAVAFSGERRRWSF	232	28767	7	4
473	593	gi|125546170|gb|EAY92309.1|	hypothetical protein OsI_14032 [Oryza sativa Indica Group]	MGLTFTKLFSRLFAKKEMRILMVGLDAAGKTTILYKLKLGEIVTTIPTIGFNVETVEYKNISFTVWDVGGQDKIRPLWRHYFQNTQGLIFVVDSNDRDRVVEARDELHRMLNEDELRDAVLLVFANKQDLPNAMNAAEITDKLGLHSLRQRHWYIQSTCATTGEGLYEGLDWLSSNIASKSLGLVAAAAADEDDEACGACEAVAAVEELAESKVVGEGELRGAFRVFDRDGDGGGEDDDDAAAARLSRHDVAVVVASLGLVGAADEDDEACGACEAVAAVEELAESKVAGEGELREAFRVFDRDGDGYVSAAELRRLGMEEGARHGDCVRMIAAHDGDGDGDGRISFQEFTRTE	232	43094	7	4
473	593	gi|125588363|gb|EAZ29027.1|	hypothetical protein OsJ_13076 [Oryza sativa Japonica Group]	MGLTFTKLFSRLFAKKEMRILMVGLDAAGKTTILYKLKLGEIVTTIPTIGFNVETVEYKNISFTVWDVGGQDKIRPLWRHYFQNTQGLIFVVDSNDRDRVVEARDELHRMLNEDELRDAVLLVFANKQDLPNAMNAAEITDKLGLHSLRQRHWYIQSTCATTGEGLYEGPGTGCPATLPARPKF	232	24613	7	4
473	593	gi|1351974|sp|P49076.2|ARF_MAIZE	RecName: Full=ADP-ribosylation factor >gi|556686|emb|CAA56351.1| ADP-ribosylation factor [Zea mays] >gi|162458318|ref|NP_001105897.1| ADP-ribosylation factor [Zea mays]	MGLTFTKLFSRLFAKKEMRILMVGLDAAGKTTILYKLKLGEIVTTIPTIGFNVETVEYKNISFTVWDVGGQDKIRPLWRHYFQNTQGLIFVVDSNDRDRVVEARDELHRMLNEDELRDAVLLVFANKQDLPNAMNAAEITDKLGLNSLRQRHWYIQSTCATTGEGLYEGLDWLSSNIATKS	232	24355	7	4
473	593	gi|148909114|gb|ABR17658.1|	unknown [Picea sitchensis] >gi|224285018|gb|ACN40238.1| unknown [Picea sitchensis]	MGLTFTKLFQRMFAKREMRILMVGLDAAGKTTILYKLKLGEIVTTIPTIGFNVETVEYKNISFTVWDVGGQDKIRPLWRHYFQNTQGLIFVVDSNDRDRVAEARDELHRMLNEDELRDAVLLVFANKQDLPNAMTAAEITDKLGLHSLRQRHWYIQSTCATSGEGLYEGLDWLSNNIANKA	232	24130	7	4
473	593	gi|148910658|gb|ABR18399.1|	unknown [Picea sitchensis] >gi|224284297|gb|ACN39884.1| unknown [Picea sitchensis] >gi|148909097|gb|ABR17650.1| unknown [Picea sitchensis] >gi|224284034|gb|ACN39755.1| unknown [Picea sitchensis] >gi|224285351|gb|ACN40399.1| unknown [Picea sitchensis	MGLTFTKLFQRLFAKKEMRILMVGLDAAGKTTILYKLKLGEIVTTIPTIGFNVETVEYKNISFTVWDVGGQDKIRPLWRHYFQNTQGLIFVVDSNDRDRVVEARDELHRMLNEDELRDAVLLVFANKQDLPNAMNAAEITDKLGLHSLRQRHWYIQSTCATSGEGLYEGLDWLSNNIANKA	232	24429	7	4
473	593	gi|149391403|gb|ABR25719.1|	ADP-ribosylation factor 1 [Oryza sativa Indica Group]	MGLAFGKLFSRLFAKKEMRILMVGLDAAGKTTILYKLKLGEIVTTIPTIGFNVETVEYKNISFTVWDVGGQDKIRPLWRHYFQNTQGLIFVVDSNDRDRVVEARDELHRMLNEDELRDAVLLVFANKQDLPNAMNAAEITDKLGLLSLRQRHWYIQSTCATTGEGLYEGLDWLSSNLASKA	232	24250	7	4
473	593	gi|15241463|ref|NP_196971.1|	ATARFA1B (ADP-ribosylation factor A1B); GTP binding / phospholipase activator/ protein binding [Arabidopsis thaliana] >gi|7573316|emb|CAB87634.1| ADP-ribosylation factor-like protein [Arabidopsis thaliana]	MGLNFTKLFSRLFAKKEMRILMVGLDAAGKTTILYKLKLGEIVTTIPTIGFNVETVEYKNISFTVWDVGGQDKIRPLWRHYFQNTQGLIFVVDSNDRDRVVEARDELHRMLNEDELRDAVLLVFANKQDLPNAMNAAEITDKLGLHSLRQRHWYIQSTCATSGEGLYEGLDWLSNNIATKVNNLNIPF	232	25229	7	4
473	593	gi|158279579|gb|EDP05339.1|	small ARF-related GTPase [Chlamydomonas reinhardtii] >gi|158270296|gb|EDO96164.1| small ARF-related GTPase [Chlamydomonas reinhardtii] >gi|159466569|ref|XP_001691481.1| small ARF-related GTPase [Chlamydomonas reinhardtii] >gi|159465365|ref|XP_001690	MGLMVSKALSRLFGKKEMRILMVGLDAAGKTTILYKLKLGEIVTTIPTIGFNVETVEYKNISFTVWDVGGQDKIRPLWRHYFQNTQGLIFVVDSNDRDRIGEAKDELHRMLNEDELRDAVLLVFANKQDLPNAMNAAEITEKLGLHGLRQRHWYIQSTCATSGEGLYEGLDWLSQNIQNKS	232	24585	7	4
473	593	gi|162672521|gb|EDQ59057.1|	predicted protein [Physcomitrella patens subsp. patens] >gi|168047375|ref|XP_001776146.1| predicted protein [Physcomitrella patens subsp. patens]	MGLTFTKLFTRLFSKQEMRILMVGLDAAGKTTILYKLKLGEIVTTIPTIGFNVETVEYKNISFTVWDVGGQDKIRPLWRHYFQNTQGLIFVVDSNDRDRVVEARDELLRMLNEDELRDAVLLVFANKQDLPNAMNAAEITDKLGLHSLRQRHWYIQSTCATSGEGLYEGLDWLSSNIANKS	232	24079	7	4
473	593	gi|162672522|gb|EDQ59058.1|	Arf1_5/ArfA-family small GTPase [Physcomitrella patens subsp. patens] >gi|168047377|ref|XP_001776147.1| Arf1_5/ArfA-family small GTPase [Physcomitrella patens subsp. patens]	MGLTFTKLFQKLFSKREMRILMVGLDAAGKTTILYKLKLGEIVTTIPTIGFNVETVEYKNISFTVWDVGGQDKIRPLWRHYFQNTQGLIFVVDSNDRDRVVEARDELHRMLNEDELRDAVLLVFANKQDLPNAMNAAEITDKLGLHSLRQRHWYIQSTCATSGEGLYEGLDWLSSNIANKA	232	24418	7	4
473	593	gi|162683995|gb|EDQ70400.1|	Arf1_5/ArfA-family small GTPase [Physcomitrella patens subsp. patens] >gi|162684063|gb|EDQ70468.1| Arf1_5/ArfA-family small GTPase [Physcomitrella patens subsp. patens] >gi|168024354|ref|XP_001764701.1| Arf1_5/ArfA-family small GTPase [Physcomitrell	MGLTFTKLFTKLFSKREMRILMVGLDAAGKTTILYKLKLGEIVTTIPTIGFNVETVEYKNISFTVWDVGGQDKIRPLWRHYFQNTQGLIFVVDSNDRDRVVEARDELHRMLNEDELRDAVLLVFANKQDLPNAMNAAEITDKLGLHSLRQRHWYIQSTCATSGEGLYEGLDWLSSNIANKS	232	24407	7	4
473	593	gi|165973134|gb|ABY76246.1|	ADP-ribosylation factor [Brassica napus]	MGLSFGKLFSRLFAKKEMRILMVGLDAAGKTTILYKLKLGEIVTTIPTIGFNVETVEYKNISFTVWDVGGQDKIRPLWRHYFQNTQGLIFVVDSNDRDRVVEARDELHRMLNEDELRDAVLLVFANKQDLPDAMNAAEITDKLGLHSLRQRHWYIQSTCATSGEGLYEGLDWLSNNIAGKA	232	24274	7	4
473	593	gi|166586|gb|AAA32729.1|	ADP-ribosylation factor [Arabidopsis thaliana] >gi|15226521|ref|NP_182239.1| ARF1A1C; GTP binding / phospholipase activator/ protein binding [Arabidopsis thaliana] >gi|295039893|emb|CBL54367.1| unnamed protein product [Arabidopsis thaliana] >gi|2950	MGLSFGKLFSRLFAKKEMRILMVGLDAAGKTTILYKLKLGEIVTTIPTIGFNVETVEYKNISFTVWDVGGQDKIRPLWRHYFQNTQGLIFVVDSNDRDRVVEARDELHRMLNEDELRDAVLLVFANKQDLPNAMNAAEITDKLGLHSLRQRHWYIQSTCATSGEGLYEGLDWLSNNIASKA	232	24303	7	4
473	593	gi|168023699|ref|XP_001764375.1|	Arf1_5/ArfA-family small GTPase [Physcomitrella patens subsp. patens] >gi|162684527|gb|EDQ70929.1| Arf1_5/ArfA-family small GTPase [Physcomitrella patens subsp. patens]	MGLTFTKLFTKLFSKREMRILMVGLDAAGKTTILYKLKLGEIVTTIPTIGFNVETVEYKNISFTVWDVGGQDKIRPLWRHYFQNTQGLIFVVDSNDRDRVVEARDELHRMLNEDELRDAVLLVFANKQDLPNAMNAAEITDKLGLHSLRQRHWYIQSTCATSGEGLYEGLDWLSSNIANKA	232	24391	7	4
473	593	gi|168024352|ref|XP_001764700.1|	predicted protein [Physcomitrella patens subsp. patens] >gi|162683994|gb|EDQ70399.1| predicted protein [Physcomitrella patens subsp. patens]	MGLTFTKLFQKLFSKREMRILMVGLDAAGKTTILYKLKLGEIVTTIPTIGFNVETVEYKNISFTVWDVGGQDKIRPLWRHYFQNTQGLIFVVDSNDRDRVVEARDELHRMLNEDELRDAVLLVFANKQDLPNAMNAAEITDKLGLHSLRQRHWYIQSTCATSGEGLYEGLDWLSSNIANKIGCHDVPSVL	232	25425	7	4
473	593	gi|168047307|ref|XP_001776112.1|	Arf1_5/ArfA-family small GTPase [Physcomitrella patens subsp. patens] >gi|162672487|gb|EDQ59023.1| Arf1_5/ArfA-family small GTPase [Physcomitrella patens subsp. patens]	MGLTFTKLFSKLFSKREMRILMVGLDAAGKTTILYKLKLGEIVTTIPTIGFNVETVEYKNISFTVWDVGGQDKIRPLWRHYFQNTQGLIFVVDSNDRDRVVEARDELHRMLNEDELRDAVLLVFANKQDLPDAMNAAEITDKLGLHSLRQRHWYIQSTCATSGEGLYEGLDWLSSNITNKS	232	24424	7	4
473	593	gi|187936039|gb|ACD37536.1|	putative ADP-ribosylation factor [Brassica napus]	MGLSFGKLFSRLFAKKEMRILMVGLDAAGKTTILYKLKLGEIVTTIPTIGFNVETVEYKNISFTVWDVGGQDKIRPLWRHYFQNTQGLIFVVDSNDRDRVVEARDELHRMLNEDELRDAVLLVFANKQDLPNAMNAAEITDKLGLHSLRQRHWYIQSTCATSGEGLYEGLDWLSNNIAGKA	232	24273	7	4
473	593	gi|192911942|gb|ACF06579.1|	ADP-ribosylation factor [Elaeis guineensis]	MGLTFTKLFSRLFAKREMRILMVGLDAAGKTTILYKLKLGEIVTTIPTIGFNVETVEYKNISFTVWDVGGQDKIRPLWRHYFQNTQGLIFVVDSNDRDRIVEARDELHRMLNEDELRDAVLLVFANKQDLPNAMNAAEITDKLGLHSLRQRHWYIQSTCATSGEGLYEGLDWLSNNIANKA	232	24126	7	4
473	593	gi|194693624|gb|ACF80896.1|	unknown [Zea mays]	MGLTFTKLFSRLFAKKEMRILMVGLDAAGKTTILYKLKLGEIVTTIPTIGFNVETVEYKNISFTVWDVGGQDKIRPLWRHYFQNTQGLIFVVDSNDRDRVVEARDELHRMLNEDELRDAVLLVFANKQDLPNAMNAAEITDKLGLHSLRQRHWYIQSTCATTGEGLYEGLDWLSSNIATKS	232	24378	7	4
473	593	gi|21553518|gb|AAM62611.1|	ADP-ribosylation factor-like protein [Arabidopsis thaliana] >gi|297326123|gb|EFH56543.1| ADP-ribosylation factor A1E [Arabidopsis lyrata subsp. lyrata] >gi|16323248|gb|AAL15358.1| AT3g62290/T17J13_250 [Arabidopsis thaliana] >gi|13926302|gb|AAK49618.	MGLSFGKLFSKLFAKKEMRILMVGLDAAGKTTILYKLKLGEIVTTIPTIGFNVETVEYKNISFTVWDVGGQDKIRPLWRHYFQNTQGLIFVVDSNDRDRVVEARDELHRMLNEDELRDAVLLVFANKQDLPNAMNAAEITDKLGLHSLRQRHWYIQSTCATSGEGLYEGLDWLSNNIANKA	232	24606	7	4
473	593	gi|217072662|gb|ACJ84691.1|	unknown [Medicago truncatula]	MGLSFTKLFSRLFAKKEMRILMVGLDAAGKTTILYKLKLGEIVTTIPTIGFNVETVEYKNISFTVWDVGGQDKIRPLWRHYFQNTQGLIFVVDSNDRDRVVEARDELHRMLNEDELRDAVLLVFANKQDLPNAMNAAEITDKLGLHSLRQRHWYIQSTCATSGEGLYEGLDWLSNNIASKS	232	24363	7	4
473	593	gi|217073794|gb|ACJ85257.1|	unknown [Medicago truncatula]	MGLTFTKLFSRLFAKKEMRILMVGLDAAGKTTILYKLKLGEIVTTIPTIGFNVETVEYKNISFTVWDVGGQDKIRPLWRHYFQNTQGLIFVVDSNDRDRVVEARDELHRMLNEDELRDAVLLVFANKQDLPNAMNAAEITDKLGLHSLRQRHWYIQSTCATSGEGLYERFGLAFQQHSQQGLMLIGSIVDW	232	25300	7	4
473	593	gi|219363613|ref|NP_001136508.1|	hypothetical protein LOC100216623 [Zea mays] >gi|194695974|gb|ACF82071.1| unknown [Zea mays]	MGLTFTKLFSRLFSKKEMRILMVGLDAAGKTTILYKLKLGEIVTTIPTIGFNVETVEYKNISFTVWDVGGQDKIRPLWRHYFQNTQGLIFVVDSNDRDRVVEAKDELHRMLNEDELRDAVLLVFANKQDLPNAMNAAEITDKLGLHSLRQRHWYIQSTCATTGEGLYEGLDWLSNNIANKA	232	24694	7	4
473	593	gi|219957610|gb|ACL67836.1|	ADP ribosylation factor [Jatropha curcas] >gi|192910700|gb|ACF06458.1| ADP ribosylation factor 002 [Elaeis guineensis]	MGLSFTKLFSRLFAKKEMRILMVGLDAAGKTTILYKLKLGEIVTTIPTIGFNVETVEYKNISFTVWDVGGQDKIRPLWRHYFQNTQGLIFVVDSNDRDRIVEARDELHRMLNEDELRDAVLLVFANKQDLPNAMNAAEITDKLGLHSLRQRHWYIQSTCATSGEGLYEGLDWLSNNIANKA	232	24388	7	4
473	593	gi|222069922|emb|CAX24098.1|	unnamed protein product [Linum usitatissimum]	MGLSFTKLFSRLFAKKEMRILMVGLDAAGKTTILYKLKLGEIVTTIPTIGFNVETVEYKNISFTVWDVGGQDKIRPLWRHYFQNTQGLIFVVDSNDRDRVVEARDELHRMLNEDELRDAVLLVFANKQDLPNAMNAAEITDKLGLNSLRQRHWYIQSTCATSGEGLYEGLDWLSNNIANKA	232	24351	7	4
473	593	gi|222636686|gb|EEE66818.1|	hypothetical protein OsJ_23578 [Oryza sativa Japonica Group]	MEDGLRRQEPEALALLFFLSSDETTMNQWRDPRRRRMERHRDKGGAGPLLSQGEKEEGGKMGLAFGKLFSRLFAKKEMRILMVGLDAAGKTTILYKLKLGEIVTTIPTIGFNVETVEYKNISFTVWDVGGQDKIRPLWRHYFQNTQGLIFVVDSNDRDRVVEARDELHRMLNEDELRDAVLLVFANKQDLPNAMNAAEITDKLGLHSLRQRHWYIQSTCATTGEGLYEGLDWLSSNIASKA	232	32135	7	4
473	593	gi|222636687|gb|EEE66819.1|	hypothetical protein OsJ_23579 [Oryza sativa Japonica Group]	MRAGEAESYRQREATAASTPIPVACGSAGGVPCVPAAGDADAVSSASLRAAAVNGECRRSIEDPSAGFSRANRRWKADGTILRPSVKGVKKEERGGGKMGLAFGKLFSRLFAKKEMRILMVGLDAAGKTTILYKLKLGEIVTTIPTIGFNVETVEYKNISFTVWDVGGQDKIRPLWRHYFQNTQGLIFVVDSNDRDRVVEARDELHRMLNEDELRDAVLLVFANKQDLPNAMNAAEITDKLGLHSLRQRHWYIQSTCATTGEGLYEGLDWLSSNIASKA	232	35957	7	4
473	593	gi|222820381|gb|ACM67553.1|	ADP-ribosylation factor-like protein [Musa acuminata AAA Group]	MGLTFTKLFSRLFAKKEMRILMVGLDAAGKTTILYKLKLGEIVTTIPTIGFNVETVEYKNISFTVWDVGGQDKIRPLWRHYFQNTQGLIFVVDSNDRDRVVEARDELHRMLNEDELRDAVLLVFANKQDPPNAMNAAEITDKLGLHSLRQRHWYIQSTCATSGEGLYEGLDWLSSNIASKA	232	24318	7	4
473	593	gi|222820383|gb|ACM67554.1|	ADP-ribosylation factor-like protein [Musa acuminata AAA Group]	MGLTFTKLFIRLFAKKEMRILMVGLDAAGKTTILYKLKLGEIVTTIPTIGFNVETVEYKNISFTVWDVGGQDKIRPLWRHYFQNTQGLIFVVDSNDRDRVVEARDELHRMLNEDELRDAVLLVFANKQDLPNAMNAAEITDKLGLHSLRQRHWYIQSTCATSGEGLYEGLDWLSSNIASKA	232	24360	7	4
473	593	gi|222844514|gb|EEE82061.1|	predicted protein [Populus trichocarpa] >gi|224128225|ref|XP_002320274.1| predicted protein [Populus trichocarpa] >gi|255548347|ref|XP_002515230.1| ADP-ribosylation factor, arf, putative [Ricinus communis] >gi|222861047|gb|EEE98589.1| predicted prot	MGLSFTKLFSRLFAKKEMRILMVGLDAAGKTTILYKLKLGEIVTTIPTIGFNVETVEYKNISFTVWDVGGQDKIRPLWRHYFQNTQGLIFVVDSNDRDRVVEARDELHRMLNEDELRDAVLLVFANKQDLPNAMNAAEITDKLGLHSLRQRHWYIQSTCATSGEGLYEGLDWLSNNIANKA	232	24374	7	4
473	593	gi|222852122|gb|EEE89669.1|	predicted protein [Populus trichocarpa] >gi|224101491|ref|XP_002312302.1| predicted protein [Populus trichocarpa] >gi|118485231|gb|ABK94475.1| unknown [Populus trichocarpa]	MGLSFTKLLGRLFSKKEMRILMVGLDAAGKTTILYKLKLGEIVTTIPTIGFNVETVEYKNISFTVWDVGGQDKIRPLWRHYFQNTQGLIFVVDSNDRDRVGEARDELHRMLNEDELRDAVLLVFANKQDLPNAMNAAEITDKLGLHSLRQRHWYIQSTCATSGEGLYEGLDWLSNNIASKA	232	24257	7	4
473	593	gi|222857311|gb|EEE94858.1|	predicted protein [Populus trichocarpa] >gi|118482509|gb|ABK93177.1| unknown [Populus trichocarpa] >gi|224122864|ref|XP_002318935.1| predicted protein [Populus trichocarpa] >gi|118483518|gb|ABK93657.1| unknown [Populus trichocarpa] >gi|224124598|ref	MGLSFTKLFSRLFAKKEMRILMVGLDAAGKTTILYKLKLGEIVTTIPTIGFNVETVEYKNISFTVWDVGGQDKIRPLWRHYFQNTQGLIFVVDSNDRDRVVEARDELHRMLNEDELRDAVLLVFANKQDLPNAMNAAEITDKLGLHSLRQRHWYIQSTCATSGEGLYEGLDWLSNNIASKA	232	24347	7	4
473	593	gi|224108844|ref|XP_002314987.1|	predicted protein [Populus trichocarpa] >gi|2852443|dbj|BAA24696.1| ADP-ribosylation factor [Salix bakko] >gi|29124981|gb|AAO63780.1| ADP-ribosylation factor 2 [Populus tremuloides] >gi|118481812|gb|ABK92843.1| unknown [Populus trichocarpa] >gi|1113	MGLSFTKLLGRLFSKKEMRILMVGLDAAGKTTILYKLKLGEIVTTIPTIGFNVETVEYKNISFTVWDVGGQDKIRPLWRHYFQNTQGLIFVVDSNDRDRVGEARDELHRMLNEDELRDAVLLVFANKQDLPNAMNAAEITDKLGLHSLRQRHWYIQSTCATSGEGLYEGLDWLSNNISSKA	232	24273	7	4
473	593	gi|226463387|gb|EEH60665.1|	predicted protein [Micromonas pusilla CCMP1545] >gi|303272103|ref|XP_003055413.1| predicted protein [Micromonas pusilla CCMP1545]	MGLTFTKLFQRLFSKKEMRILMVGLDAAGKTTILYKLKLGEIVTTIPTIGFNVETVEYKNISFTVWDVGGQDKIRPLWRHYFQNTQGLIFVVDSNDRDRVSEARDELHRMLNEDELRDAVLLVFANKQDLPNAMTAAEITDKLGLHSIRQRHWFIQSTCATSGEGLYEGLDWLSTNIANAGSR	232	24259	7	4
473	593	gi|241920074|gb|EER93218.1|	hypothetical protein SORBIDRAFT_01g003770 [Sorghum bicolor] >gi|242037651|ref|XP_002466220.1| hypothetical protein SORBIDRAFT_01g003770 [Sorghum bicolor]	MGLTFTKLFSRLFAKKEMRILMVGLDAAGKTTILYKLKLGEIVTTIPTIGFNVETVEYKNISFTVWDVGGQDKIRPLWRHYFQNTQGLIFVVDSNDRDRVVEARDELHRMLNEDELRDAVLLVFANKQDLPNAMNAAEITDKLGLHSLRQRHWYIQSTCATTGEGLYEGLDWLSSNIASKS	232	24364	7	4
473	593	gi|242056935|ref|XP_002457613.1|	hypothetical protein SORBIDRAFT_03g010350 [Sorghum bicolor] >gi|241929588|gb|EES02733.1| hypothetical protein SORBIDRAFT_03g010350 [Sorghum bicolor]	MGLSFTKLFSRLFAKKEMRILMVGLDAAGKTTILYKLKLGEIVTTIPTIGFNVETVEYKNISFTVWDVGGQDKIRPLWRHYFQNTQGLIFVVDSNDRDRVVEARDELHRMLNEDELRDAVLLVFANKQDLPNAMNAAEITDKLGLHSLRQRHWYIQSTCATTGEGLYEGLDWLSSNIANKA	232	24361	7	4
473	593	gi|255560878|ref|XP_002521452.1|	ADP-ribosylation factor, arf, putative [Ricinus communis] >gi|223539351|gb|EEF40942.1| ADP-ribosylation factor, arf, putative [Ricinus communis]	MGLSFTKLFSRLFAKKEMRILMVGLDAAGKTTILYKLKLGEIVTTIPTIGFNVETVEYKNISFTVWDVGGQDKIRPLWRHYFQNTQGLIFVVDSNDRDRVVEARDELHRMLNEDELRDAVLLVFANKQDLPNAMNAAEITDKLGLNSLRQRHWYIQSTCATSGEGLYEGLEWLSNNIASKA	232	24338	7	4
473	593	gi|255625573|gb|ACU13131.1|	unknown [Glycine max]	MGQSFTKLFSRLFAKKEMRILMVGLDAAGKTTILYKLKLGEIVTTIPTIGFNVETVEYKNISFTVWDVGGQDKIRPLWRHYFQNTQGLIFVVDSNDRDRVVEARDELHRMLNEDELRDAVLLVFANKQDLPNAMNAAEITDKLGLHSLRQRHWYIQSTCATSGEGLYEGLDWLSTTLQQA	232	24002	7	4
473	593	gi|255633096|gb|ACU16903.1|	unknown [Glycine max]	MGLSFTKLFSRLFAKKEMRILMVGLDAAGKTTILYKLKLGEIVTTIPTIGFNVETVEYKNISFTVWDVGGQDKIRPLWRHYFQNTQGLIFVVDSNDRDRVVEARDELHRMLNEDELRDAVLLVFANKQDLPNAMNAAEITDKLGLHSLRQRHWYIQSTCATSGEGLYEGLDWLSNNIATSIVIIGHGLHQVHLSLAVVTPMFDV	232	26521	7	4
473	593	gi|284433800|gb|ADB85106.1|	ADP ribosylation factor 002 [Jatropha curcas]	MGLSFTKLFSRLFAKKEMRILMVGLDAAGKTTILYKLKLGEIVTTIPTIGFNVETVEYKNISFTVWDVGGQDKIRPLWRHYFQNTQGLIFVVDSNDRDRVVEARDELHRMLNEDELRDAVLLVFANKQDFPNAMNAAEITDKLGLHSFRQRHWYIQSTCATFGEGLYEGLDWLSNNIANRA	232	24226	7	4
473	593	gi|28630948|gb|AAO45616.1|	ADP-ribosylation factor 1 [Gossypium hirsutum] >gi|28300416|gb|AAO37820.1| ADP-ribosylation factor [Gossypium hirsutum] >gi|29028258|gb|AAO62348.1| ADP-ribosylation factor 1 [Gossypium hirsutum] >gi|17154685|emb|CAD12855.1| ADP-ribosylation factor [	MGLSFAKLFSRLFAKKEMRILMVGLDAAGKTTILYKLKLGEIVTTIPTIGFNVETVEYKNISFTVWDVGGQDKIRPLWRHYFQNTQGLIFVVDSNDRDRVVEARDELHRMLNEDELRDAVLLVFANKQDLPNAMNAAEITDKLGLHSLRQRHWYIQSTCATSGEGLYEGLDWLSNNIANKG	232	24330	7	4
473	593	gi|29124979|gb|AAO63779.1|	ADP-ribosylation factor 1 [Populus tremuloides]	MGLSFTKLLGRLFSEKEMRILMVGLDAAGKTTILYKLKLGEIVTTIPTIGFNVETVEYKNISFTVWDVGGQDKIRPLWRHYFQNTQGLIFVVDSNDRDRVGEAREELHRMLNEDELRDAVLLVFANKQDLPNAMNAAEITDKLGLHSLRQRHWYIQSTCATSGEGLYEGLDWLSNNIASKA	232	23968	7	4
473	593	gi|296089819|emb|CBI39638.3|	unnamed protein product [Vitis vinifera]	MGGDYLPFLAMFLVQMGYAGMNIFVKLAMDSGMNPFILVAYRQIFATVAMIPFAYFLERKTRPKITRIVLFQAFLSSIFGATLNQILYFIGLKHSNPTLGCAFNNLFPAMTFLLAVPFRLETVGIKTRPGQAKVLGTVVCIGGAMILTFYRGHAINIGESGIHWKYAEQLKTRDSQSGANFILGPFLLITSCISWAIWFIIQGRMCVKFAAPYTSSTLMCFMASIECGVIGLFVDHQPSAWSLNDSIRLIAALYSAIVCTALAFCLMSWTIQRKGPLYVSVFSPLLLVIVAILSWALLRDKLHFGTVVGSLFVVLGLYAVLWGKGKEENQRGSREEAEEGKEDLELQINGKLYIRKDPNPDQRRLNVRHIRPSINARVSYQFLLLSFGQLLEICPLRFP…	232	76049	7	4
473	593	gi|296788279|gb|ADH44695.1|	ADP-ribosylation factor [Salvia miltiorrhiza]	MGLTFTKLFSRLFAKKEMRILMVGLDAAGKTTILYKLKLGEIVTTIPTIGFNVETVEYKNISFTVWDVGGQDKVRPLWRHYFQNTQGLIFVVDSNDRDRVVEARDELHRMLNEDELRDAVLLVFANKQDLPNAMNAAEITDKLGLHSLRQRHWYIQSTCATSGEGLYEGLDWLSNNIANKA	232	24374	7	4
473	593	gi|297317463|gb|EFH47885.1|	ADP-ribosylation factor A1B [Arabidopsis lyrata subsp. lyrata] >gi|297807485|ref|XP_002871626.1| ADP-ribosylation factor A1B [Arabidopsis lyrata subsp. lyrata]	MGLNFTKLFSRLFAKKEMRILMVGLDAAGKTTILYKLKLGEIVTTIPTIGFNVETVEYKNISFTVWDVGGQDKIRPLWRHYFQNTQGLIFVVDSNDRDRVVEARDELHRMLNEDELRDAVLLVFANKQDLPNAMNAAEITDKLGLHSLRQRHWYIQSTCATSGEGLYEGLDWLSNNIASKVNN	232	24630	7	4
473	593	gi|297322507|gb|EFH52928.1|	ADP-ribosylation factor [Arabidopsis lyrata subsp. lyrata] >gi|297817572|ref|XP_002876669.1| ADP-ribosylation factor [Arabidopsis lyrata subsp. lyrata]	MGLSFGKLFSRLFAKKEMRILMVGLDAAGKTTILYKLKLGEIVTTIPTIGFNVETVEYKNISFTVWDVGGQDKIRPLWRHYFQNTQGLIFVVDSNDRDRVVEARDELHRMLNEDELRDAVLLVFANKQDLPNAMNAAEITDKLGLHSLRQRHWYIQSTCATSGEGLYEGLDWLSNNIANKVYIPSFKNA	232	25583	7	4
473	593	gi|297334623|gb|EFH65041.1|	hypothetical protein ARALYDRAFT_476172 [Arabidopsis lyrata subsp. lyrata] >gi|297841801|ref|XP_002888782.1| hypothetical protein ARALYDRAFT_476172 [Arabidopsis lyrata subsp. lyrata]	MGLSFAKLFSRLFAKKEMRILMVGLDAAGKTTILYKLKLGEIVTTIPTIGFNVETVEYKNISFTVWDVGGQDKIRPLWRHYFQNTQGLIFVVDSNDRDRVVEARDELHRMLNEDELRDAVLLVFANKQDLPNAMNAAEITDKLGLHSLRQRHWYIQSTCATSGEGLYEGLDWLSNNIAGKVT	232	24416	7	4
473	593	gi|297338427|gb|EFH68844.1|	ADP-ribosylation factor [Arabidopsis lyrata subsp. lyrata] >gi|297849408|ref|XP_002892585.1| ADP-ribosylation factor [Arabidopsis lyrata subsp. lyrata]	MGLSFAKLFSRLFAKKEMRILMVGLDAAGKTTILYKLKLGEIVTTIPTIGFNVETVEYKNISFTVWDVGGQDKIRPLWRHYFQNTQGLIFVVDSNDRDRVVEARDELHRMLNEDELRDAVLLVFANKQDLPNAMNAAEITDKLGLHSLRQRHWYIQSTCATSGEGLYEGLDWLSNNIANKA	232	24344	7	4
473	593	gi|297736783|emb|CBI25984.3|	unnamed protein product [Vitis vinifera]	MPIKSSYSLLGDLLSPISLSAAGFHLFYKKMGLSFTKLFSRLFAKKEMRILMVGLDAAGKTTILYKLKLGEIVTTIPTIGFNVETVEYKNISFTVWDVGGQDKIRPLWRHYFQNTQGLIFVVDSNDRDRVVEARDELHRMLNEDELRDAVLLVFANKQDLPNAMNAAEITDKLGLHSLRQRHWYIQSTCATSGEGLYEGLDWLSNNIANKA	232	28552	7	4
473	593	gi|297841175|ref|XP_002888469.1|	ADP-ribosylation factor [Arabidopsis lyrata subsp. lyrata] >gi|297334310|gb|EFH64728.1| ADP-ribosylation factor [Arabidopsis lyrata subsp. lyrata]	MGLSFGKLFSRLFAKKEMRILMVGLDAAGKTTILYKLKLGEIVTTIPTIGFNVETVEYKNISFTVWDVGGQDKIRPLWRHYFQNTQGLIFVVDSNDRDRVVEARDELHRMLNEDELRDAVLLVFANKQDLPNAMNAAEITDKLGLHSLRQRHWYIQSTCATSGEGLYEGLDWLSNNIANKVYIPSLKNA	232	25549	7	4
473	593	gi|297845410|ref|XP_002890586.1|	hypothetical protein ARALYDRAFT_472612 [Arabidopsis lyrata subsp. lyrata] >gi|13926300|gb|AAK49617.1|AF372901_1 F28C11.30/F28C11.30 [Arabidopsis thaliana] >gi|15810605|gb|AAL07190.1| putative ADP-ribosylation factor 1 [Arabidopsis thaliana] >gi|2159	MGLSFAKLFSRLFAKKEMRILMVGLDAAGKTTILYKLKLGEIVTTIPTIGFNVETVEYKNISFTVWDVGGQDKIRPLWRHYFQNTQGLIFVVDSNDRDRVVEARDELHRMLNEDELRDAVLLVFANKQDLPNAMNAAEITDKLGLHSLRQRHWYIQSTCATSGEGLYEGLDWLSNNIAGKA	232	24287	7	4
473	593	gi|302763433|ref|XP_002965138.1|	ARF family GTPase [Selaginella moellendorffii] >gi|302757603|ref|XP_002962225.1| ARF family GTPase [Selaginella moellendorffii] >gi|300167371|gb|EFJ33976.1| ARF family GTPase [Selaginella moellendorffii] >gi|300170884|gb|EFJ37485.1| ARF family GTPas	MGLTFTKLFQRLFAKKEMRILMVGLDAAGKTTILYKLKLGEIVTTIPTIGFNVETVEYKNISFTVWDVGGQDKIRPLWRHYFQNTQGLIFVVDSNDRDRVVEARDELHRMLNEDELRDAVLLVFANKQDLPNAMNAAEITDKLGLHSLRQRHWYIQSTCATSGEGLYEGLDWLSNNIANKG	232	24415	7	4
473	593	gi|30681825|ref|NP_172533.2|	ATARFA1F (ARABIDOPSIS THALIANA ADP-RIBOSYLATION FACTOR A1F); GTP binding / copper ion binding / phospholipase activator/ protein binding [Arabidopsis thaliana] >gi|110740724|dbj|BAE98462.1| similar to ADP-ribosylation factor gb|AAD17207 [Arabidopsis	MGLSFAKLFSRLFAKKEMRILMVGLDAAGKTTILYKLKLGEIVTTIPTIGFNVETVEYKNISFTVWDVGGQDKIRPLWRHYFQNTQGLIFVVDSNDRDRVVEARDELHRMLNEDELRDAVLLVFANKQDLPNAMNAAEITDKLGLHSLRQRHWYIQSTCATSGEGLYEGLDWLSNNIASKA	232	24317	7	4
473	593	gi|307105238|gb|EFN53488.1|	hypothetical protein CHLNCDRAFT_49011 [Chlorella variabilis]	MGLTFTKLFARLFSKKEMRILMVGLDAAGKTTILYKLKLGEIVTTIPTIGFNVETVEYKNISFTVWDVGGQDKASIRPLWRHYFQNTQGLIFVVDSNDRDRIGEARDELHRMLNEDELRDAVLLVFANKQDLPNAMNAAEITDKLGLHSLRQRHWYIQSCCATSGEGLYEGLDWLSQNIANRP	232	24341	7	4
473	593	gi|307135971|gb|ADN33830.1|	ADP-ribosylation factor [Cucumis melo subsp. melo]	MRILMVGLDAAGKTTILYKLKLGEIVTTIPTIGFNVETVEYKNISFTVWDVGGQDKIRPLWRHYFQNTQGLIFVVDSNDRDRVVEARDELHRMLNEDELRDAVLLVFANKQDLPNAMNAAEITDKLGLHSLRQRHWYIQSTCATSGEGLYEGLDWLSNNIANKA	232	21477	7	4
473	593	gi|308810236|ref|XP_003082427.1|	unnamed protein product [Ostreococcus tauri] >gi|145353078|ref|XP_001420856.1| predicted protein [Ostreococcus lucimarinus CCE9901] >gi|116060895|emb|CAL57373.1| unnamed protein product [Ostreococcus tauri] >gi|144581091|gb|ABO99149.1| predicted pro	MGITFAKLFQRLFSKKEMRILMVGLDAAGKTTILYKLKLGEIVTTIPTIGFNVETVEYKNISFTVWDVGGQDKIRPLWRHYFQNTQGLIFVVDSNDRDRVSEARDELHRMLNEDELRDAVLLVFANKQDLPNAMSAAEITDKLGLHSLRQRHWFIQSTCATSGEGLYEGLDWLSSNISQRA	232	24087	7	4
473	593	gi|3182919|sp|O23778.3|ARF1_CATRO	RecName: Full=ADP-ribosylation factor 1 >gi|2232256|gb|AAB62249.1| ADP-ribosylation factor 1 [Catharanthus roseus]	MGLSFTKLFSRLFAKKEMRILMVGLDAAGKTTILYQLKLGEIVTTIPTIGFNVETVEYQYISFTVWDVGGQDKIRPLWRHYFQNTQGLIFVVDSNDRDRVVEARDELHRMLNEDELRDAVLLVFANKQDLPNAMNAAEITDKHGLHSLRQRHWYIQSTCATSGEGLYEGLDWLSNNIANKA	232	23839	7	4
473	593	gi|37791223|gb|AAR03592.1|	ARF-like small GTPase [Brassica juncea] >gi|7643794|gb|AAF65512.1| ADP-ribosylation factor [Capsicum annuum]	MGLSFGKLFSRLFAKKEMRILMVGLDAAGKTTILYKLKLGEIVTTIPTIGFNVETVEYKNISFTVWDVGGQDKIRPLWRHYFQNTQGLIFVVDSNDRDRVVEARDELHRMLNEDELRDAVLLVFANKQDLPNAMNAAEITDKLGLHSLRQRHWYIQSTCATSGEGLYEGLDWLSNNIANKA	232	24330	7	4
473	593	gi|37932258|gb|AAP69821.1|	ARF [Oryza sativa Japonica Group]	MGLTFTKLFSRLFSKKEMRILMVGLDAAGKTTILYKLKLGEIVTTIPTIGFNVETVEYKNISFTVRDVGGQDKIRPLWRHYFQNTQGLIFVVDSNDRDRVVEARDELHRMLNEDELRDAVLLVFANKQDLPNAMNAAEITDKLGLHSLRQRHWYIQSTCATTGEGLYEGLDWLSSNIANKA	232	24361	7	4
473	593	gi|38353642|gb|AAR18698.1|	ADP-ribosylation factor 1 [Populus tomentosa]	MGLSFTKLFSRLFAKKEMRILMVGLDAAGKTTILYKLKLGEIVTTIPTIGFNVETVEYKNISFTVWDVGGQDKIRPLWRHYFQNTQGLIFVVDSNDRDRVVEARDELHRMLNEDELRDAVLLVFANKQDLPNAMNAAEITDKLGLHSLRQRPNLWGLINSPKEVPLVANLFLGWKGVLLIGGGPKNLGLLSPKPK	232	26837	7	4
473	593	gi|39653273|gb|AAR29293.1|	ADP-ribosylation factor [Medicago sativa] >gi|56311394|emb|CAI29265.1| ADP-ribosylation factor 1 [Medicago truncatula]	MGLTFTKLFSRLFAKKEMRILMVGLDAAGKTTILYKLKLGEIVTTIPTIGFNVETVEYKNISFTVWDVGGQDKIRPLWRHYFQNTQGLIFVVDSNDRDRVVEARDELHRMLNEDELRDAVLLVFANKQDLPNAMNAAEITDKLGLHSLRQRHWYIQSTCATSGEGLYEGLDWLSNNIASKA	232	24361	7	4
473	593	gi|4056469|gb|AAC98042.1|	Strong similarity to gb|M95166 ADP-ribosylation factor from Arabidopsis thaliana. ESTs gb|Z25826, gb|R90191, gb|N65697, gb|AA713150, gb|T46332, gb|AA040967, gb|AA712956, gb|T46403, gb|T46050, gb|AI100391 and gb|Z25043 come from this gene	MGLSFAKLFSRLFAKKEMRILMVGLDAAGKTTILYKLKLGEIVTTIPTIGFNVETVEYKNISFTVWDVGGQDKIRPLWRHYFQNTQGLIFVVDSNDRDRVVEARDELHRMLNEDELRDAVLLVFANKQDLPNAMNAAEITDKLGLHSLRQRHWYIQSTCATSGEGLYEGLDWLSNNIAGKVNYHKQQF	232	25565	7	4
473	593	gi|4324967|gb|AAD17207.1|	ADP-ribosylation factor [Glycine max]	SFTKLFSRLFAKKEMRILMVGLDAAGKTTILYKLKLGEIVTTIPTIGFNVETVEYKNISFTVWDVGGQDKIRPLWRHYFQNTQGLIFVVDSNDRDRVVEARDELHRMLNEDELRDAVLLVFANKQDLPNAMNAAEITDKLGLHSLRQRHWYIQSTCATSGEGLYEGLDWLSNNIASKA	232	24046	7	4
473	593	gi|47026845|gb|AAT08648.1|	ADP-ribosylation factor [Hyacinthus orientalis]	SSLRSTHSLSLKPLSHVEMGLSFTKLFSRLFAKKEMRILMVGLDAAGKTTILYKLKLGEIVTTIPTIGFNVETVEYKNISFTVWDVGGQDKIRPLWRHYFQNTQGLIFVVDSNDRDRVVEARDELHRMLNEDELRDAVLLVFANKQDLPNAMNAAEITDKLGLHSLRQRHWYIQSTCATSGEGLYEGLDWLSNNIASKG	232	26596	7	4
473	593	gi|47026876|gb|AAT08663.1|	ADP-ribosylation factor [Hyacinthus orientalis]	MGLAFGKIFSRLFAKKEMRILMVGLDAAGKTTILYKLKLGEIVTTIPTIGFNVETVEYKNISFTVWDVGGQDKIRPLWRHYFQNTQGLIFVVDSNDRDRVVEARDELHRMLNEDELRDAVLLVFANKQDLPNAMNAAEITDKLGLQSLRQRHWYIQSTCATSGEGLYEGLDWLSSNISNKS	232	24310	7	4
473	593	gi|52548250|gb|AAU82112.1|	ADP-ribosylation factor [Triticum aestivum]	MGLTFTKLFGRLFAKKEMRILMVGLDAAGKTTILYKLKLGEIVTTIPTIGFNVETVEYKNISFTVWDVGGQDKIRPLWRHYFQNTQGLIFVVDSNDRDRVVEARDELHRMLNEDELRDAVLLVFANKQDLPNAMNAAEITDKLGLHSLRQRHWYIQSTCATAGEGLYEGLDWLSSNIASKS	232	24304	7	4
473	593	gi|6573751|gb|AAF17671.1|AC009398_20	F20B24.7 [Arabidopsis thaliana]	MGLSFAKLFSRLFAKKEMRILMVGLDAAGKTTILYKLKLGEIVTTIPTIGFNVETVEYKNISFTVWDVGGQDKIRPLWRHYFQNTQGLIFVVDSNDRDRVVEARDELHRMLNEDELRDAVLLVFANKQDLPNAMNAAEITDKLGLHSLRQRHWYIQSTCATSGEGLYEGLDWLSNNIASKVRLLNS	232	24929	7	4
473	593	gi|6815060|dbj|BAA90347.1|	putative ADP-ribosylation factor [Oryza sativa Japonica Group] >gi|115435820|ref|NP_001042668.1| Os01g0265100 [Oryza sativa Japonica Group] >gi|215695127|dbj|BAG90318.1| unnamed protein product [Oryza sativa Japonica Group] >gi|113532199|dbj|BAF0458	MGLTFTKLFSRLFSKKEMRILMVGLDAAGKTTILYKLKLGEIVTTIPTIGFNVETVEYKNISFTVWDVGGQDKIRPLWRHYFQNTQGLIFVVDSNDRDRVVEARDELHRMLNEDELRDAVLLVFANKQDLPNAMNAAEITDKLGLHSLRQRHWYIQSTCATTGEGLYEGLDWLSSNIANKA	232	24391	7	4
473	593	gi|76160966|gb|ABA40446.1|	unknown [Solanum tuberosum]	MGLTFTKLFSRLFAKKEMRILMVGLDAAGKTTILYKLKLGEIVTTIPTIGFNVETVEYKNISFTVWDVGGQDKIRPLWRHYFQNTQGLIFVVDSNDRDRVVEARDELHRMLNEDELRDAVLLVFANKQDLPNAMNAAEITDKLGLHSLRQRHWYIQSACATSGEGLYEGLDWLSNNIANKA	232	24358	7	4
473	593	gi|83283999|gb|ABC01907.1|	ARF-like small GTPase-like protein [Solanum tuberosum] >gi|76160984|gb|ABA40455.1| ARF-like small GTPase-like protein [Solanum tuberosum]	MGLSFGKLFSRLFAKKEMRILMVGLDAAGKTTILYKLKLGEIVTTIPTIGFNVETVEYKNISFTVWDVGGQDKIRPLWRHYFQNTQGLIFVVDSNDRDRVVEARDELHRMLNEDELRDAVLLVFANKQDLPNAMNAAEITDKLGLHSLRQRHWYIQSTCATSGEGLYEGLDWLSNNIANKG	232	24316	7	4
473	593	gi|8778579|gb|AAF79587.1|AC007945_7	F28C11.12 [Arabidopsis thaliana]	MGLSFAKLFSRLFAKKEMRILMVGLDAAGKTTILYKLKLGEIVTTIPTIGFNVETVEYKNISFTVWDVGGQDKIRPLWRHYFQNTQGLIFVVDSNDRDRVVEARDELHRMLNEDELRDAVLLVFANKQDLPNAMNAAEITDKLGLHSLRQRHWYIQSTCATSGEGLYEGKVRGGVDLLSKSGCRGKHYLNFFFGFRFQKNYLLYSFGKTVIEDFTYCFRGFGHILLVHFDSYVGMRFRWHLLHET	232	33417	7	4
473	593	gi|965483|dbj|BAA08259.1|	ADP-ribosylation factor [Daucus carota] >gi|1703375|sp|P51822.2|ARF1_DAUCA RecName: Full=ADP-ribosylation factor 1	MGLSFTKLFSRLFAKKEMRILMVGLDAAGKTTILYKLKLGEIVTTIPTIGFNVETVEYKNISFTVWDVGGQDKIRPLWRHYFQNTQGLIFVVDSNDRDRVVEARDELHRMLNEDELRDAVLLVFANKQDLPNAMNAAEIIDKLGLHSLRQRHWYIQSTCATSGEGLYEGLDWLSNNIASKS	232	24375	7	4
475	595	gi|241919731|gb|EER92875.1|	hypothetical protein SORBIDRAFT_01g047440 [Sorghum bicolor] >gi|242036965|ref|XP_002465877.1| hypothetical protein SORBIDRAFT_01g047440 [Sorghum bicolor]	MKKAANKLVVEEPTNDDVSICNLHPATMEKLSIYHGDVVLLKGKRRRDTICIAMNNEGCGEHALGINRSVRSNLRVRLGDVVSVHPCHDAAYGAKVHVLPLDDTVEGLTGDLFEAYLKPHFLNAYRPVRKGDLFLVRGGMRSVEFKVVDIHPPAEYCIVADDTVVFCDGEPVKREDEERLDGVGYDDVGGMRKQLAQIRELVELPLRHPQLFKSIGVKPPKGILLEKTHGEVERRIVSQLLTLMDGLKTRAHVIVMAATNRPNSIDPALRRFGRFDREIDIGVPDEVGRLEVLRVHTKNMKLAEDVNLEAVSKDTHGYVGADLAALCTEAALQCIREKMDVIDLEDDTIDAEILNSMAITNDHLKTALAGTNPSALRETVVEVPNVSWADIGGLEGVKR…	230	91388	9	3
475	595	gi|241922381|gb|EER95525.1|	hypothetical protein SORBIDRAFT_01g047410 [Sorghum bicolor] >gi|242042265|ref|XP_002468527.1| hypothetical protein SORBIDRAFT_01g047410 [Sorghum bicolor]	MKKAANKLVVEEPTNDDVSICNLHPATMEKLSIYHGDVVLLKGKRRRDTICIAMNNEGCGEHALGINRSVRSNLRVRLGDVVSVHPCHDAAYGAKVHVLPLDDTVEGLTGDLFEAYLKPHFLNAYRPVRKGDLFLVRGGMRSVEFKVVDIHPPAEYCIVADDTVVFCDGEPVKREDEERLDGVGYDDVGGMRKQLAQIRELVELPLRHPQLFKSIGVKPPKGILLYGPPGSGKTLIARAVANETGAFFFCINGPEIMSKLAGESESNLRKAFQEAEKNAPSIIFIDEIDSIAPKREKTHGEVERRIVSQLLTLMDGLKTRAHVIVMGATNRPNSIDPALRRFGRFDREIDIGVPDEVGRLEVLRVHTKNMKLAEDVNLEAVSKDTHGYVGADLAALCTE…	230	100282	9	3
476	597	gi|106879575|emb|CAJ38371.1|	HMG-protein [Plantago major]	VKSAFNLSLSGSYYTLLPSFLLLFSSPFFLSCSIFYHRSLHYLLLEMKTGGRSKAAVRKETLKPVDDRKVGKRKAAAAPKVKKPAAKKDKKAKKDPNKPKRPPSAFFVFLEEFRQTFKKENPNIKAVSAVGKAGGEKWKSLTDAEKAPYEAKAAKRKSEYEKLMNAYNKKQESSADEADEGSEKSRSEVHDDEEDSVQEEEDEDEDDDEDDD	230	34324	4	4	0.087	*	0.231	*	0.526	*	0.232	*	0.456	*	0.713	*	0.867	*
476	597	gi|147815135|emb|CAN74566.1|	hypothetical protein [Vitis vinifera] >gi|297740214|emb|CBI30396.3| unnamed protein product [Vitis vinifera]	MKAAKGKGAARRDTKEALKPAEDRKIGKRKAAVKAEKSSKRATTKDKKAKKDPNKPKRPPSAFFVFLEEFRKVFKKENPNVKAVSAVGKAGGERWKSLSEAEKAPYEAKAAKKKAEYEKIMNAYNKKQESTADDGDEESDRSKSEVNDQDDEESAEEEEEEEEDDDED	230	29220	4	4
476	597	gi|222865260|gb|EEF02391.1|	high mobility group family [Populus trichocarpa] >gi|224112525|ref|XP_002316220.1| high mobility group family [Populus trichocarpa]	MKIAKGKGTARTEKKEVLLPVEDRKIGKRKAALKANESSKKRVKKEKITKKDPNKPKRPPSAFFVFLEEFRKVYKQEHPNVKAVSAVGKAGGEKWKSLSAAEKAPYEAKAAKRKSDYEKLMTAYNKKQDTDDGDDDDNDDDNIEQSHKSKSEVNGQNDESDEEDEDDDGDDDDEDD	230	30210	4	4
476	597	gi|223532493|gb|EEF34283.1|	DNA-binding protein MNB1B, putative [Ricinus communis] >gi|255574381|ref|XP_002528104.1| DNA-binding protein MNB1B, putative [Ricinus communis]	MKNSKGTGAAKASKDALKPADDRKVGKRKAAAAVDRSSKLKAKREKKAKKDPNKPKRPPSAFFVFLEEFRKTFKKENPSVTSVAAVGKAGGAKWKSMSSAEKAPYEAKAAKKKDEYGKLMNAYNKKQESTADDGEEESDRSKSEVNDEDDEATGEEGQEEEEEDEDEEDDE	230	28883	4	4
476	597	gi|225440676|ref|XP_002279947.1|	PREDICTED: hypothetical protein [Vitis vinifera]	MKAAKGKGAARRDTKEALKPAEDRKIGKRKAAVKAEKSSKRATTKDKKAKKDPNKPKRPPSAFFVFLEEFRKVFKKENPNVKAVSAVGKAGGERWKSLSEAEKAPYEAKAAKKKAEYEKIMNAYNKKQESTADDGDEESDRSKSEVNDQDDEESAEQEEEEEEEDDDED	230	29348	4	4
476	597	gi|225448398|ref|XP_002269398.1|	PREDICTED: hypothetical protein isoform 1 [Vitis vinifera] >gi|147854340|emb|CAN83423.1| hypothetical protein [Vitis vinifera]	MKVTKGKAAARKDKKEALKPVEDRRLGKRKAALKADKSTKKLAKKEKLAKKDPNKPKRPPSAFFVFLEEFRKVYKQEHPNVKAVSAVGKAGGEKWKSLSEADKAPYEAKAAKRKSDYEKLMAAYNKKQESMADDDEEESDRSKSEVNDEDEETGEEEEEDEDEDED	230	29518	4	4
476	597	gi|225448400|ref|XP_002270185.1|	PREDICTED: hypothetical protein isoform 2 [Vitis vinifera]	MKVTKGKAAARKDKKEALKPVEDRRLGKRKAALKADKSTKKLAKKEKLAKKDPNKPKRPPSAFFVFLEEFRKVYKQEHPNVKAVSAVGKAGGEKWKSLSEADKAPYEAKAAKRKSDYEKLMAAYNKKQESMADDDEEESDRSKSEEEEEDEDEDED	230	28400	4	4
476	597	gi|229611858|emb|CAY56403.1|	unnamed protein product [Glycine max] >gi|147224073|emb|CAN08754.1| unnamed protein product [Glycine max]	MKTAKGKGAARPSKESLKPVDDRKVGKRKASGKPEKSRAPKKEKKAKKDPNKPKRPPSAFFVFLEEFRKTFKAENPLVKAVSVVGKAGGEKWKSLSSAEKAPYEAKAAKRKAEYEKLIKAYEKKQASSADDDESDKSKSEVNDEDDASGEEDHQEDEDDEEEEDDEDDD	230	29499	4	4
476	597	gi|255625939|gb|ACU13314.1|	unknown [Glycine max]	MKNAKGKGAARASKESLKPVDDRKVGKRKASGKPGRSSAPKKEKKAKKDPNKPKRPPSAFFVFLEEFRKTFKAENPNVKAVSVVGKAGGEKWKSLSSAEKAPYESKAAKRKAEYEKLIKAYDKKQASSADDEESDKSKSEVNDEDDASGEEEEEDDEEEEDDEDDD	230	28719	4	4
476	597	gi|297736623|emb|CBI25494.3|	unnamed protein product [Vitis vinifera]	MINHGAEEKKRIFFFLGERIFPSTMKVTKGKAAARKDKKEALKPVEDRRLGKRKAALKADKSTKKLAKKEKLAKKDPNKPKRPPSAFFVFLEEFRKVYKQEHPNVKAVSAVGKAGGEKWKSLSEAVLL	230	23319	4	4
476	597	gi|310911278|emb|CBX51671.1|	unnamed protein product [Glycine max] >gi|310911344|emb|CBX51704.1| unnamed protein product [Oryza sativa]	MKNAKGKGAARASKESLKPVDDRKVGKRKASGKPGRSSAPKKEKKAKKDPNKPKRPPSAFFVFLEEFRKTFKAENPNVKAVSVVGKAGGEKWKSLSSAEKAPYEAKAAKRKAEYEKLIKAYDKKQASSADDEESDKSKSEVNDEDDASGEEEEEDDEEEEDDEDDD	230	28703	4	4
478	599	gi|225456481|ref|XP_002280858.1|	PREDICTED: hypothetical protein [Vitis vinifera] >gi|297734505|emb|CBI15752.3| unnamed protein product [Vitis vinifera]	MAAHPLSLLLILLLGVLLPCGDSKFIAYNTSHGVVPGKLNVHLVPHSHDDVGWLKTIDQYYVGSNNSIQGACVENVLDSLVTALLSNPDRKFIYVEQAFFQRWWGDQSEIIQGLVRKFISSGQLELINGGMCMHDEATSHYIDMIDQTTLGHRFIKNEFNLTPRIGWQIDPFGHSAVQAYLLGAEVGFDSIFFARIDYQDRAKRKDEKSLEVIWQGSRTFGSSSQIFAGAFPENYEPPPGGFYYEVNDDSPIVQDNIKLFDYNVPDRVNAFVEAAIAQANITRTNHIMWTMGTDFKYQYANSWFRQMDKLIHYVNLDGRVNALYSTPSIYTDAKHAASESWPLKTDDYFPYADRINAYWTGYFTSRAGLKGYVRMMSSYYLAARQLEFFKGRNESGPTT…	228	129305	11	1	---		---		---		---		---		---		---
481	603	gi|116780962|gb|ABK21901.1|	unknown [Picea sitchensis] >gi|224284852|gb|ACN40156.1| unknown [Picea sitchensis]	MVHVNFYRNYGKTFKKPRRPYEKERLDAELKLVGEYGLRNKRELWRVQYTLSRIRNAARMLLTLDEKNPRRIFEGEALLRRMNRYGLLDESQSKLDYVLALTVENFLERRLQTLVFKSGMAKSIHHARVLIRQRHIRVGRQVVNIPSFMVRVDSQKHIDFSLTSPLGGGRPGRVKRKNMKAASKKAGGEDGEEEDDD	226	28241	7	7
481	603	gi|224071319|ref|XP_002303402.1|	predicted protein [Populus trichocarpa] >gi|222840834|gb|EEE78381.1| predicted protein [Populus trichocarpa]	MVHVSFYRNYGKTFKKPRRPYEKERLDAELKLVGEYGLRAKRELWRVQYALSRIRNAARMLLTLDEKNPRRIFEGEALLRRMNRYGLLEENQNKLDYVLALTVENFLERRLQTLVFKAGMAKSIHHARVLIKQRHTRVGRQVVNIPSFMVRVDSQKHIDFSLTSPLGGGRPGRVKRKNQKAAAKKATGGDGDEEDEE	226	28424	7	7
481	603	gi|224286025|gb|ACN40724.1|	unknown [Picea sitchensis] >gi|224284446|gb|ACN39957.1| unknown [Picea sitchensis] >gi|224284136|gb|ACN39805.1| unknown [Picea sitchensis] >gi|294463673|gb|ADE77363.1| unknown [Picea sitchensis] >gi|148908089|gb|ABR17162.1| unknown [Picea sitchensis	MVHVVFYRNYGKTFKKPRRPYEKERLDAELKLVGEYGLRNKRELWRVQYTLSRIRNAARMLLTLDEKNPRRIFEGEALLRRMNRYGLLDETQSKLDYVLALTVENFLERRLQTLVFKSGMAKSIHHARVLIRQRHIRVGRQVVNIPSFMVRVDSQKHIDFSLTSPLGGGRPGRVKRKNLKAASKKAAGGDGEEEDEE	226	28192	7	7
481	603	gi|255626239|gb|ACU13464.1|	unknown [Glycine max]	MVHVSFYRNYEKTFKKPRRPYEKERLDAELKLVGEYGLRCKRELWRVQYALSRIRNNARNLLTLDEKNPRRIFEGEALLRRMFRYGLLDETQNKLDYVLALTVENFLERRLQTLVFKSGMAKSIHHARVLIRQRHIRVGRQVVNIPSFMVRVDSQKHIDFSLTSPLGGGRPGRVKRKNQRAAAKKAAGGDGDEEDED	226	28049	7	7
481	603	gi|255629938|gb|ACU15321.1|	unknown [Glycine max]	MVHVSFYRNYGKTLKKPRRPYEKERLDAELKLVGEYGLRCKRELWRVQYALSRIRNNARNLLTLDEKNPRRIFEGEALLRRMFRYGLLDETQNKLDYVLALTVENFLERRLQTLVFKSGMAKSIHHARVLIRQRHIRVGRQVVNIPSFMVRVDSQKHIDFSLTSPLGGGRPGRVKRKNQRAAAKKLLVETEMRRMKIKLLMASDIYRPCARFLSVSVDILDF	226	31801	7	7
481	603	gi|255640554|gb|ACU20562.1|	unknown [Glycine max]	MVHVSFYRNYGKTFKKPRRPYEKERLDAELKLVGEYGLRCKRELWRVQYALSRIRNNARNLLTLDEKNPRRIFEGEALLRRMFRYGLLDETQNKLDYVLALTVENFLERRLQTLVFKSGMAKSIHHARVLIKQRHIRVGRQVVNIPSFLVRVDSQKHIDFSLTSPLGGGRPGRVKRRNQRAAAKKAAGGDGDEEDED	226	27959	7	7
481	603	gi|297733997|emb|CBI15244.3|	unnamed protein product [Vitis vinifera] >gi|225452773|ref|XP_002283256.1| PREDICTED: hypothetical protein [Vitis vinifera] >gi|296082890|emb|CBI22191.3| unnamed protein product [Vitis vinifera] >gi|225456733|ref|XP_002275166.1| PREDICTED: hypotheti	MVHVSFYRNYGKTFKKPRRPYEKERLDAELKLVGEYGLRCKRELWRVQYVLSRIRNNARMLLTLDEKNPRRIFEGEALLRRMNRYGLLDESQNKLDYVLALTVENFLERRLQTLVFKSGMAKSIHHARVLIRQRHIRVGRQVVNIPSFLVRMDSQKHIDFSLTSPLGGGRPGRVKRKNQKAAAKKAAGGDGDEEDED	226	28265	7	7
484	607	gi|110283023|sp|Q56XG6.2|RH15_ARATH	RecName: Full=DEAD-box ATP-dependent RNA helicase 15	MGDARDNEAYEEELLDYEEEDEKVPDSGNKVNGEAVKKGYVGIHSSGFRDFLLKPELLRAIVDSGFEHPSEVQHECIPQAILGMDVICQAKSGMGKTAVFVLSTLQQIEPSPGQVSALVLCHTRELAYQICNEFVRFSTYLPDTKVSVFYGGVNIKIHKDLLKNECPHIVVGTPGRVLALAREKDLSLKNVRHFILDECDKMLESLDMRRDVQEIFKMTPHDKQVMMFSATLSKEIRPVCKKFMQDPMEIYVDDEAKLTLHGLVQHYIKLSEMEKTRKLNDLLDALDFNQVVIFVKSVSRAAELNKLLVECNFPSICIHSGMSQEERLTRYKSFKEGHKRILVATDLVGRGIDIERVNIVINYDMPDSADTYLHRVGRAGRFGTKGLAITFVASASDSE…	224	58237	7	7
484	607	gi|14190381|gb|AAK55671.1|AF378868_1	AT5g11200/F2I11_90 [Arabidopsis thaliana] >gi|108861899|sp|Q9LFN6.2|RH56_ARATH RecName: Full=DEAD-box ATP-dependent RNA helicase 56 >gi|24111365|gb|AAN46806.1| At5g11170/F2I11_60 [Arabidopsis thaliana] >gi|16323360|gb|AAL15393.1| AT5g11200/F2I11_90	MGDARDNEAYEEELLDYEEEDEKVPDSGNKVNGEAVKKGYVGIHSSGFRDFLLKPELLRAIVDSGFEHPSEVQHECIPQAILGMDVICQAKSGMGKTAVFVLSTLQQIEPSPGQVSALVLCHTRELAYQICNEFVRFSTYLPDTKVSVFYGGVNIKIHKDLLKNECPHIVVGTPGRVLALAREKDLSLKNVRHFILDECDKMLESLDMRRDVQEIFKMTPHDKQVMMFSATLSKEIRPVCKKFMQDPMEIYVDDEAKLTLHGLVQHYIKLSEMEKNRKLNDLLDALDFNQVVIFVKSVSRAAELNKLLVECNFPSICIHSGMSQEERLTRYKSFKEGHKRILVATDLVGRGIDIERVNIVINYDMPDSADTYLHRVGRAGRFGTKGLAITFVASASDSE…	224	58250	7	7
484	607	gi|15450405|gb|AAK96496.1|	AT5g11170/F2I11_60 [Arabidopsis thaliana]	MGDARDNEAYEEELLDYEEEDEKVPDSGNKVNGEAVKKGYVGIHSSGFRDFLLKPELLRAIVDSGFEHPSEVQHECIPQAILGMDVICQAKSGMGKTAVFVLSTLQQIEPSPGQVSALVLCHTRELAYQICNEFVRFSTYLPDTKVSVFYGGVNIKIHKDLLKNECPHIVVGTPGRVLALAREKDLSLKNVRHFILDECDKMLESLDMRRDVQEIFKMTPHDKQVMMFSATLSKEIRPVCKKFMQDPMEIYVDDEAKLTLHGLVQHYIKLSEMEKNRKLNDLLDALDFNQVVIFVKSVSRAAELNKLLVECNFPSICIHSGMSQEERLTRYKSFKEGHKRILVATDLVGRGIDIERVNIVINYDMPDSADTYLHRVGRAGRFGTKGLAITFVASASDSE…	224	116178	7	7
484	607	gi|162678511|gb|EDQ64969.1|	predicted protein [Physcomitrella patens subsp. patens] >gi|168035593|ref|XP_001770294.1| predicted protein [Physcomitrella patens subsp. patens]	MGDSYPETEELLDYEEEEEAAPDAVAAKTNGETVKKGYVGIHSSGFRDFLLKPELLRAIVDCGFEHPSEVQHECIPQAILGMDVICQAKSGMGKTAVFVLSTLQQIEPVTGQVAALVLCHTRELAYQICHEFERFSTYLPDIKVAVFYGGVNIKTHKDLLKNECPHIVVGTPGRILGLARDKDLSLKSVRHFILDECDKMLESLDMRRDVQEIFKLTPHDKQVMMFSATLSKEIRPVCKRFMQDPMEIYVDDEAKLTLHGLVQHYIKLGEVEKNRKLNDLLDALDFNQVVIFVKSVSRAAELNKLLVECNFPSICIHSGMSQEERLTRYKGFKEGHKRILVATDLVGRGIDIERVNIVINYDMPDSADTYLHRVGRAGRFGTKGLAITFVASPSDSDVL…	224	57299	7	7
484	607	gi|168059571|ref|XP_001781775.1|	predicted protein [Physcomitrella patens subsp. patens] >gi|162666777|gb|EDQ53423.1| predicted protein [Physcomitrella patens subsp. patens]	MGEPYPETEELLDYEEEEEAAPDAVAAKTNGETVKKGYVGIHSSGFRDFLLKPELLRAIVDCGFEHPSEVQHECIPQAILGMDVICQAKSGMGKTAVFVLSTLQQIEPVAGQVAALVLCHTRELAYQICHEFERFSTYLPDIKVAVFYGGVNIKTHKDLLKNECPHIVVGTPGRILGLARDKDLSLKSVRHFILDECDKMLESLDMRRDVQEIFKLTPHDKQVMMFSATLSKEIRPVCKRFMQDPMEIYVDDEAKLTLHGLVQHYIKLSEVEKNRKLNDLLDALDFNQVVIFVKSVSRAAELNKLLVECNFPSICIHSGMSQEERLTRYKGFKEGHKRILVATDLVGRGIDIERVNIVINYDMPDSADTYLHRVGRAGRFGTKGLAITFVASAPDSNVL…	224	58463	7	7
484	607	gi|186522071|ref|NP_850807.2|	ATP binding / ATP-dependent helicase/ helicase/ nucleic acid binding [Arabidopsis thaliana]	MDVICQAKSGMGKTAVFVLSTLQQIEPSPGQVSALVLCHTRELAYQICNEFVRFSTYLPDTKVSVFYGGVNIKIHKDLLKNECPHIVVGTPGRVLALAREKDLSLKNVRHFILDECDKMLESLDMRRDVQEIFKMTPHDKQVMMFSATLSKEIRPVCKKFMQDPMEIYVDDEAKLTLHGLVQHYIKLSEMEKNRKLNDLLDALDFNQVVIFVKSVSRAAELNKLLVECNFPSICIHSGMSQEERLTRYKSFKEGHKRILVATDLVGRGIDIERVNIVINYDMPDSADTYLHRVGRAGRFGTKGLAITFVASASDSEVLNQVQERFEVDIKELPEQIDTSTYMPS	224	47434	7	7
484	607	gi|218573202|emb|CAV33602.1|	unnamed protein product [Linum usitatissimum]	MGETRDNDYEEELLDYEEEEEKAPDSITAKVNGEAPKKGYVGIHSSGFRDFLLKPELLRAIVDSGFEHPSEVQHECIPQAILGMDVICQAKSGMGKTAVFVLSTLQQIEPTPGQVIALVLCHTRELAYQICHEFERFSTYLPDTKVAVFYGGVNIKTHRDLLKNECPHVVVGTPGRILALARDKELSLKNVRHFILDECDKMLESLDMRRDVQEIFKMTPHDKQVMMFSATLSKEIRPVCKKFMQDPMEIYVDDEAKLTLHGLVQHYIKLTELEKNRKLNDLLDALDFNQVVIFVKSVSRAAELNKLLIECNFPSICIHSGMSQEERLTRYKGFKEGHKRILVATDLVGRGIDIERVNIVINYDMPDSADTYLHRVGRAGRFGTKGLAITFVSSASDSD…	224	58078	7	7
484	607	gi|218576468|emb|CAV33664.1|	unnamed protein product [Zea mays] >gi|218573238|emb|CAV33620.1| unnamed protein product [Zea mays]	MMGEAKENDVYEEELLDYEEDDDKTVDGSAAKPTGEVAKKGYVGIHSSGFRDFLLKPELLRAIQDCGFEHPSEVQHECIPQAILGMDVICQAKSGMGKTAVFVLSSLQQIDPVAGQVAALVLCHTRELAYQICHEFERFSKYLTEVKVAVFYGGVHIRKHKDLLKNECPHIVVGTPGRILALARDKDLSLKNVRHFILDECDKMLESLDMRRDVQEIFKMTPHDKQVMMFSATLSKEIRPVCKKFMQDPMEIYVDDEAKLTLHGLVQHYIKLSEAEKNRKLNDLLDALDFNQVVIFVKSVSRAAELNKLLCECNFPSICIHSGMTQEERLTRYKNFKEGHKRILVATDLVGRGIDIERVNIVINYDMPDSADTYLHRVGRAGRFGTKGLAITFVSSASD…	224	59227	7	7
484	607	gi|222855599|gb|EEE93146.1|	predicted protein [Populus trichocarpa] >gi|224092470|ref|XP_002309623.1| predicted protein [Populus trichocarpa]	MGETRDNDTYEEELLDYEEEDEKAPDSVGAKVNGEAVKKGYVGIHSSGFRDFLLKPELLRSIVDSGFEHPSEVQHECIPQAILGMDVICQAKSGMGKTAVFVLSTLQQIEPTSGQVIALVLCHTRELAYQICHEFERFSTYLPDTKVAVFYGGVNIKTHKDLLKNECPHIVVGTPGRILALARDKDLSLKNVRHFILDECDKMLESLDMRRDVQEIFKMTPHDKQVMMFSATLSKEIRPVCKKFMQDPMEIYVDDEAKLTLHGLVQHYIKLTELEKNRKLNDLLDALDFNQVVIFVKSVSRAAELNKLLVECNFPSICIHSGMSQEERLMRYKGFKEGHKRILVATDLVGRGIDIERVNIVINYDMPDSADTYLHRVGRAGRFGTKGLAITFVSSASDS…	224	58407	7	7
484	607	gi|223543251|gb|EEF44783.1|	dead box ATP-dependent RNA helicase, putative [Ricinus communis] >gi|255553153|ref|XP_002517619.1| dead box ATP-dependent RNA helicase, putative [Ricinus communis]	MEEVKDTEAYEEELLDYEEEEEKAPDSVSAKAADTAKKGYVGIHSSGFRDFLLKPELLRAIIDSGFEHPSEVQHECIPQAILGMHVICQAKSGMGKTAVFVLSTLQQIDPVAGQVAALVLCHTRELAYQICHEFERFSTYLPDLKVSVFYGGVNIKIHKDLLKNECPHVVVGTPGRILALARDKDLGLKNVRHFILDECDKMLESLDMRRDVQEIFKMTPYDKQVMMFSATLSKEIRPVCKKFMQAPMEIYVDDEAKLTLHGLVQHYIKLTELEKNRKLNDLLDALDFNQVVIFVKSVSRAAELNKLLMECNFPSICIHSGMSQEERLTKYKNFKEGHKRILVATDLVGRGIDIERVNIVINYDMPDSADTYLHRVGRAGRFGTKGLAITFVSSASDSD…	224	58830	7	7
484	607	gi|224143128|ref|XP_002324856.1|	predicted protein [Populus trichocarpa] >gi|222866290|gb|EEF03421.1| predicted protein [Populus trichocarpa]	MGETRDNDAYEEELLDYEEEDDKAPDSVGAKVNGEAVKKGYVGIHSSGFRDFLLKPELLRSIVDSGFEHPSEVQHECIPQAILGMDVICQAKSGMGKTAVFVLSTLQQIEPTSGQVIALVLCHTRELAYQICHEFERFSTYLPDTKVAVFYGGVNVKTHKDLLKNECPHVVVGTPGRILALARDKDLSLKNVRHFILDECDKMLESLDMRRDVQEIFKLTPHDKQVMMFSATLSKEIRPVCKKFMQDPMEIYVDDEAKLTLHGLVQHYIKLTELEKNRKLNDLLDALDFNQVVIFVKSVSRAAELNKLLVECNFPSICIHSGMSQEERLMRYKGFKEGHKRILVATDLVGRGIDIERVNIVINYDMPDSADTYLHRVGRAGRFGTKGLAITFVSSASDS…	224	58317	7	7
484	607	gi|225430261|ref|XP_002285072.1|	PREDICTED: hypothetical protein [Vitis vinifera]	MGETRDNDAYEEELLDYEEEEDKAPDSVTGKVNGEAAKKGYVGIHSSGFRDFLLKPELLRAIVDSGFEHPSEVQHECIPQAILGMDVICQAKSGMGKTAVFVLSTLQQIEPVTGQVAALVLCHTRELAYQICHEFERFSTYLPDIKVAVFYGGVNIKIHKDLLKNECPHIVVGTPGRILALARDKDLALKNVRHFILDECDKMLESLDMRRDVQEIFKMTPHDKQVMMFSATLSKEIRPVCKKFMQDPMEIYVDDEAKLTLHGLVQHYIKLSELEKNRKLNDLLDALDFNQVVIFVKSVSRAAELNKLLVECNFPSICIHSGMPQEERLTRYKGFKEGHKRILVATDLVGRGIDIERVNIVINYDMPDSADTYLHRVGRAGRFGTKGLAITFVSSASDS…	224	58307	7	7
484	607	gi|226506726|ref|NP_001141599.1|	hypothetical protein LOC100273717 [Zea mays] >gi|224032233|gb|ACN35192.1| unknown [Zea mays]	MMGEAKENDVYEEELLDYEEDDDKTVDGSAAKPTGEVAKKGYVGIHSSGFRDFLLKPELLRAIQDCGFEHPSEVQHECIPQAILGMDVICQAKSGMGKTAVFVLSSLQQIDPVAGQVAALVLCHTRELAYQICHEFERFSKYLTEVKVAVFYGGVHIRKHKDLLKNECPHIVVGTPGRILALARDKDLSLKNVRHFILDECDKMLESLDMRRDVQEIFKMTPHDKQVMMFSATLSKEIRPVCKKFMQDPMEIYVDDEAKLTLHGLVQHYIKLSEAEKNRKLNDLLDALDFNQVVIFVKSVSRAAELNKLLCECNFPSICIHSGMTQEERLTSYKNFKEGHKRILVATDLVGRGIDIERVNIVINYDMPDSADTYLHRVGRAGRFGTKGLAITFVSSASD…	224	59158	7	7
484	607	gi|226528292|ref|NP_001149406.1|	spliceosome RNA helicase BAT1 [Zea mays] >gi|195627032|gb|ACG35346.1| spliceosome RNA helicase BAT1 [Zea mays]	MGEAKENDVYEEELLDYEEDDDKTVDGSAAKPTGEVAKKGYVGIHSSGFRDFLLKPELLRAIQDCGFEHPSEVQHECIPQAILGMDVICQAKSGMGKTAVFVLSSLQQIDPVAGQVAALVLCHTRELAYQICHEFERFSKYLTEVKVAVFYGGVHIRKHKDLLKNECPHIVVGTPGRILALARDKDLSLKNVRHFILDECDKMLESLDMRRDVQEIFKMTPHDKQVMMFSATLSKEIRPVCKKFMQDPMEIYVDDEAKLTLHGLVQHYIKLSEAEKNRKLNDLLDALDFNQVVIFVKSVSRAAELNKLLCECNFPSICIHSGMTQEERLTRYKNFKEGHKKILVATDLVGRGIDIERVNIVINYDMPDSADTYLHRVGRAGRFGTKGLAITFVSLCFGF	224	55840	7	7
484	607	gi|227206242|dbj|BAH57176.1|	AT5G11200 [Arabidopsis thaliana]	MEIYVDDEAKLTLHGLVQHYIKLSEMEKNRKLNDLLDALDFNQVVIFVKSVSRAAELNKLLVECNFPSICIHSGMSQEERLTRYKSFKEGHKRILVATDLVGRGIDIERVNIVINYDMPDSADTYLHRVGRAGRFGTKGLAITFVASASDSEVLNQVQERFEVDIKELPEQIDTSTYMPS	224	24217	7	7
484	607	gi|238481238|ref|NP_001154706.1|	DEAD/DEAH box helicase, putative [Arabidopsis thaliana]	MGDARDNEAYEEELLDYEEEDEKVPDSGNKVNGEAVKKGYVGIHSSGFRDFLLKPELLRAIVDSGFEHPSEVQHECIPQAILGMDVICQAKSGMGKTAVFVLSTLQQIEPSPGQVSALVLCHTRELAYQICNEFVRFSTYLPDTKVSVFYGGVNIKIHKDLLKNECPHIVVGTPGRVLALAREKDLSLKNVRHFILDECDKMLESLDMRRDVQEIFKMTPHDKQVMMFSATLSKEIRPVCKKFMQDFLENETVSVRLFSFGVENSEWRLCSFGFIVLVWVSMFRAILMFHSKTHIFEEKRWTRISPMEIYVDDEAKLTLHGLVQHYIKLSEMEKNRKLNDLLDALDFNQVVIFVKSVSRAAELNKLLVECNFPSICIHSGMSQEERLTRYKSFKEGHKR…	224	66038	7	7
484	607	gi|238481240|ref|NP_001154707.1|	DEAD/DEAH box helicase, putative [Arabidopsis thaliana]	MGDARDNEAYEEELLDYEEEDEKVPDSGNKVNGEAVKKGYVGIHSSGFRDFLLKPELLRAIVDSGFEHPSEVQHECIPQAILGMDVICQAKSGMGKTAVFVLSTLQQIEPSPGQVSALVLCHTRELAYQICNEFVRFSTYLPDTKVSVFYGGVNIKIHKDLLKNECPHIVVGTPGRVLALAREKDLSLKNVRHFILDECDKMLESLDMRRDVQEIFKMTPHDKQVMMFSATLSKEIRPVCKKFMQDGLRTLSGDSVALWWVGFGSGYCVFPRFHRARMGLNVPSNIDPMEIYVDDEAKLTLHGLVQHYIKLSEMEKNRKLNDLLDALDFNQVVIFVKSVSRAAELNKLLVECNFPSICIHSGMSQEERLTRYKSFKEGHKRILVATDLVGRGIDIERVN…	224	62826	7	7
484	607	gi|255646475|gb|ACU23716.1|	unknown [Glycine max]	MLESLDMRKDVQDIFKMTPHDKQVMMFSATLSKEIRPVCKKFMQDPMEIYVDDEAKLTLHGLVQHYIKLKEEEKNRKLNDLLDALDFNQVVIFVKSVSRAAELDKLLVECNFPSICIHSGMSQEERLKRYKGFKEGHTRILVATDLVGRGIDIERVNIVINYDMPDSADTYLHRVGRAGRFGTKGLAITFVSCSTDVDVLNNVQSRFEVDIKQLPEQIDTSTYMPS	224	31927	7	7
484	607	gi|296082026|emb|CBI21031.3|	unnamed protein product [Vitis vinifera]	MGETRDNDAYEEELLDYEEEEDKAPDSVTGKVNGEAAKKGYVGIHSSGFRDFLLKPELLRAIVDSGFEHPSEVDSSYLLHFFPTIVLLSFILLFGFLFCGFLSLGLLKVSVLSKNCLGHEVIHYYHTLDFGEVKWFMQHECIPQAILGMDVICQAKSGMGKTAVFVLSTLQQIEPVTGQVAALVLCHTRELAYQICHEFERFSTYLPDIKVAVFYGGVNIKIHKDLLKNECPHIVVGTPGRILALARDKDLALKNVRHFILDECDKMLESLDMRRDVQEIFKMTPHDKQVMMFSATLSKEIRPVCKKFMQDPMEIYVDDEAKLTLHGLVQHYIKLSELEKNRKLNDLLDALDFNQVVIFVKSVSRAAELNKLLVECNFPSICIHSGMPQEERLTRYKGF…	224	71530	7	7
484	607	gi|297743441|emb|CBI36308.3|	unnamed protein product [Vitis vinifera] >gi|225442993|ref|XP_002268833.1| PREDICTED: hypothetical protein [Vitis vinifera]	MGEARDNDAYEEELLDYEEEDEKAPDSVASKAAGESAKKGYVGIHSSGFRDFLLKPELLRSIVDSGFEHPSEVQHECIPQAILGMDVICQAKSGMGKTAVFVLSTLQQIEPVAGQVAALVLCHTRELAYQICHEFERFSTYLPDIKVAVFYGGVSIKTHKDLLKNECPHIVVGTPGRILALARDKDLGLKHVRHFILDECDKMLESLDMRRDVQEIFKMTPHDKQVMMFSATLSKEIRPVCKKFMQDPMEIYVDDEAKLTLHGLVQHYIKLSELEKNRKLNDLLDALDFNQVVIFVKSVSRAAELNKLLMECNFPSICIHSGMPQEERLTRYKNFKEGHKRILVATDLVGRGIDIERVNIVINYDMPDSADTYLHRVGRAGRFGTKGLAITFVSSASDS…	224	58267	7	7
484	607	gi|297807157|ref|XP_002871462.1|	hypothetical protein ARALYDRAFT_487950 [Arabidopsis lyrata subsp. lyrata] >gi|297317299|gb|EFH47721.1| hypothetical protein ARALYDRAFT_487950 [Arabidopsis lyrata subsp. lyrata]	MGDARDNEAYEEELLDYEEEDEKVPDSGNKVNGEAVKKGYVGIHSSGFRDFLLKPELLRAIVDSGFEHPSEVQHECIPQAILGMDVICQAKSGMGKTAVFVLSTLQQIEPSPGQVSALVLCHTRELAYQICNEFVRFSTYLPDTKVSVFYGGVNIKIHKDLLKNECPHIVVGTPGRVLALARDKDLSLKNVRHFILDECDKMLESLDMRRDVQEIFKMTPHDKQVMMFSATLSKEIRPVCKKFMQDPMEIYVDDEAKLTLHGLVQHYIKLSEMEKNRKLNDLLDALDFNQVVIFVKSVSRAAELNKLLVECNFPSICIHSGMSQEERLTRYKSFKEGHKRILVATDLVGRGIDIERVNIVINYDMPDSADTYLHRVGRAGRFGTKGLAITFVASASDSE…	224	58236	7	7
484	607	gi|297811229|ref|XP_002873498.1|	hypothetical protein ARALYDRAFT_909079 [Arabidopsis lyrata subsp. lyrata] >gi|297319335|gb|EFH49757.1| hypothetical protein ARALYDRAFT_909079 [Arabidopsis lyrata subsp. lyrata]	MGDARDNEAYEEELLDYEEEDEKVPDSGSKVNGEAVKKGYVGIHSSGFRDFLLKPELLRAIVDSGFEHPSEVQHECIPQAILGMDVICQAKSGMGKTAVFVLSTLQQIEPSPGQVSALVLCHTRELAYQICNEFVRFSTYLPDTKVSVFYGGVNIKIHKDLLKNECPHIVVGTPGRVLALARDKDLSLKNVRHFILDECDKMLESLDMRRDVQEIFKMTPHDKQVMMFSATLSKEIRPVCKKFMQDPMEIYVDDEAKLTLHGLVQHYIKLNEMEKNRKLNDLLDALDFNQVVIFVKSVSRAAELNKLLVECNFPSICIHSGMSQEERLTRYKSFKEGHKRILVATDLVGRGIDIERVNIVINYDMPDSADTYLHRVGRAGRFGTKGLAITFVASASDST…	224	58208	7	7
484	607	gi|300568530|emb|CBV16166.1|	unnamed protein product [Brassica napus] >gi|259708142|emb|CBG02646.1| unnamed protein product [Brassica napus]	MGDVRDNEAYEEELLDYEEEDEKVLDSGNKVNGDAVKKGYVGIHSSGFRDFLLKPELLRAIVDSGFEHPSEVQHECIPQAILGMDVICQAKSGMGKTAVFVLSTLQQIEPAPGQVSALILCHTRELAYQICNEFVRFSTYLPDTKVSVFYGGVNNKIHKDLLKNECPHIVVGTPGRVLGLARDKDLSLKNVRHFILDECDKMLESLDMRRDVQEIFKMTPHEKQVMMFSATLSKEIRPVCKKFMQDPMEIYVDDEAKLTLHGLVQHYIKLGEMEKNRKLNDLLDALDFNQVVIFVKSVSRARELNKLLIECNFPSICIHSGMSQEERLTHYKSFKEGHKRILVATDLVGRGIDIERVNIVINYDMPDSADTYLHRVGRAGRFGTKGLAITFVASASDSE…	224	58242	7	7
484	607	gi|300568536|emb|CBV16169.1|	unnamed protein product [Zea mays] >gi|259708148|emb|CBG02649.1| unnamed protein product [Zea mays] >gi|259708266|emb|CBG02708.1| unnamed protein product [Zea mays] >gi|300568654|emb|CBV16228.1| unnamed protein product [Zea mays]	MGEAKENDVYEEELLDYEEDDDKTVDGSAAKPTGEVAKKGYVGIHSSGFRDFLLKPELLRAIQDCGFEHPSEVQHECIPQAILGMDVICQAKSGMGKTAVFVLSSLQQIDPVAGQVAALVLCHTRELAYQICHEFERFSKYLTEVKVAVFYGGVHIRKHKDLLKNECPHIVVGTPGRILALARDKDLSLKNVRHFILDECDKMLESLDMRRDVQEIFKMTPHDKQVMMFSATLSKEIRPVCKKFMQDPMEIYVDDEAKLTLHGLVQHYIKLSEAEKNRKLNDLLDALDFNQVVIFVKSVSRAAELNKLLCECNFPSICIHSGMTQEERLTRYKNFKEGHKRILVATDLVGRGIDIERVNIVINYDMPDSADTYLHRVGRAGRFGTKGLAITFVSSASDS…	224	59096	7	7
484	607	gi|300568668|emb|CBV16235.1|	unnamed protein product [Glycine max] >gi|259708160|emb|CBG02655.1| unnamed protein product [Glycine max] >gi|259708280|emb|CBG02715.1| unnamed protein product [Glycine max] >gi|300568548|emb|CBV16175.1| unnamed protein product [Glycine max]	MGETKDEAYEEELLDYEEEDEKAPDSAGAKVNGEATKKGYVGIHSSGFRDFLLKPELLRAIVDSGFEHPSEVQHECIPQAILGMDVICQAKSGMGKTAVFVLSTLQQIDPVPGQVSALVLCHTRELAYQICHEFERFSTYLPDLKVAVFYGGVNIKVHKDLLKNECPHIVVGTPGRILALTRDKDLSLKNVRHFILDECDKMLESLDMRKDVQDIFKMTPHDKQVMMFSATLSKEIRPVCKKFMQDPMEIYVDDEAKLTLHGLVQHYIKLKEEEKNRKLNDLLDALDFNQVVIFVKSVSRAAELDKLLVECNFPSICIHSGMSQEERLKRYKGFKEGHTRILVATDLVGRGIDIERVNIVINYDMPDSADTYLHRVGRAGRFGTKGLAITFVSCSTDVD…	224	59158	7	7
484	607	gi|3776005|emb|CAA09205.1|	RNA helicase [Arabidopsis thaliana]	FRNPSRFRDPTNSAPYLSLLNLRSMGDARDNEAYEEELLDYEEEDEKVPDSGNKVNGEAVKKGYVGIHSSGFRDFLLKPELLRAIVDSGFEHPSEVQHECIPQAILGMDVICQAKSGMGKTAVFVLSTLQQIEPSPGQVSALVLCHTRELAYQICNEFVRFSTYLPDTKVSVFYGGVNIKIHKDLLKNECPHIVVGTPGRVLALAREKDLSLKNVRHFILDECDKMLESLDMRRDVQEIFKMTPHDKQVMMFSATLSKEIRPVCKKFMQDPMEIYVDDEAKLTLHGLVQHYIKLSEMEKNRKLNDLLDALDFNQVVIFVKSVSRADELNKLLVGCHFPSICIHSGMSQEERLTRYKSFKEGHKRILVATDLVGRGIDIERVNIVINYDMPDSADTYLHR…	224	61048	7	7
484	607	gi|62319895|dbj|BAD93957.1|	DEAD BOX RNA helicase RH15 - like protein [Arabidopsis thaliana]	MFRAISLYHSKTHIYEENLVDEDLRSGPMEIYVDDEAKLTLHGLVQHYIKLSEMEKNRKLNDLLDALDFNQVVIFVKSVSRAAELNKLLVECNFPSICIHSGMSQEERLTRYKSFKEGHKRILVATDLVGRGIDIERVNIVINYDMPDSADTYLHRVGRAGRFGTKGLAITFVASASDSEVLNQVQERFEVDIKELPEQIDTSTYMPS	224	27823	7	7
484	607	gi|8953379|emb|CAB96652.1|	DEAD BOX RNA helicase RH15-like protein [Arabidopsis thaliana]	MGDARDNEAYEEELLDYEEEDEKVPDSGNKVNGEAVKKGYVGIHSSGFRDFLLKPELLRAIVDSGFEHPSEVQHECIPQAILGMDVICQAKSGMGKTAVFVLSTLQQIEPSPGQVSALVLCHTRELAYQICNEFVRFSTYLPDTKVSVFYGGVNIKIHKDLLKNECPHIVVGTPGRVLALAREKDLSLKNVRHFILDECDKMLESLDMRRDVQEIFKMTPHDKQVMMFSATLSKEIRPVCKKFMQDPMEIYVDDEAKLTLHGLVQHYIKLSEMEKTRKLNDLLDALDFNQVVIFVKSVSRAAELNKLLVECNFPSICIHSGMSQEERLTRYKSFKEGHKRILVATDLVGRGIDIERVNIVINYDMPDSADTYLHRVGRAGRFGTKGLAITFVASASDSE…	224	59591	7	7
484	607	gi|8953382|emb|CAB96655.1|	DEAD BOX RNA helicase RH15 [Arabidopsis thaliana]	MGDARDNEAYEEELLDYEEEDEKVPDSGNKVNGEAVKKGYVGIHSSGFRDFLLKPELLRAIVDSGFEHPSEVQHECIPQAILGMDVICQAKSGMGKTAVFVLSTLQQIEPSPGQVSALVLCHTRELAYQICNEFVRFSTYLPDTKVSVFYGGVNIKIHKDLLKNECPHIVVGTPGRVLALAREKDLSLKNVRHFILDECDKMLESLDMRRDVQEIFKMTPHDKQVMMFSATLSKEIRPVCKKFMQDPMEIYVDDEAKLTLHGLVQHYIKLSEMEKNRKLNDLLDALDFNQVVIFVKSVSRAAELNKLLVECNFPSICIHSGMSQEERLTRYKSFKEGHKRILVATDLVGRGIDIERVNIVINYDMPDSADTYLHRVGRAGRFGTKGLAITFVASASDSE…	224	58601	7	7
490	613	gi|162673928|gb|EDQ60444.1|	predicted protein [Physcomitrella patens subsp. patens] >gi|168044609|ref|XP_001774773.1| predicted protein [Physcomitrella patens subsp. patens]	MSEVAGMGSKNPKVFFDISIGDELEGRIVMELFADVVPRTAENFRALCTGEKGIGPVTGRPMHYKGTIFHRVIKSFMIQGGDFENANGTGGESIYGKNFEDEVFLMKHERKGMLSMANAGPNTNGSQFFITTTRAPHLDGKHVVFGKVLKGMGVVRSIEHQPTDSASNKPLADVRIVDCGELPEGVDDGVVGFTQDGDKYPDWPSDLDTQPADAAFWEAAVDSARALGNEFFKKGDYKTALRKYRKALRYLDVCWEKEELDETRSNSLRKTKSLILTNSAACKLKLEDPRGALTDCEYAMQTGVDNVKALFRQGQAYLAIGDIDSALMSLTKASNIEPNDKINERNENEKKSYARMFS	222	48663	7	7
490	613	gi|219749662|emb|CAW52454.1|	unnamed protein product [Populus tremula x Populus alba] >gi|219736571|emb|CAW66886.1| unnamed protein product [Populus tremula x Populus alba] >gi|257339369|emb|CBC23516.1| unnamed protein product [Populus tremula x Populus alba] >gi|257732888|emb|	MPNPFFDMTVGGQPVGRIVMELFADVVPRTAENFRALCTGEKGVGRLGKPLHFKGSSFHRVIPNFMCQGGDFTAGNGTGGESIYGAKFADENFVRKHTGPGVLSMANAGPGTNGSQFFICTVKTEWLDGKHVVFGQVVEGMDVVKAIEKVGS	222	19402	7	7
490	613	gi|219749670|emb|CAW52458.1|	unnamed protein product [Kandelia candel] >gi|219900239|emb|CAW84654.1| unnamed protein product [Kandelia candel] >gi|257732896|emb|CBC87699.1| unnamed protein product [Kandelia candel] >gi|37722431|gb|AAN72439.1| cyclophilin [Kandelia candel] >gi|2	MANPRVYFDMSVGGSPAGRIVMELFADVVPRTTENFRALCTGEKGKGRSGKPLHYKGSTFHLVIPNFMCQGGDFTAGNETGGESIYGSKFADENFVKKHTGPGILSMANAGPGTNGSQFFICTAKTEWLDGKHVVFGQVVYGMDVVKAIEKVGSGNGRTSKPVVIADCGQLS	222	22417	7	7
490	613	gi|41387718|gb|AAS01736.1|	putative cyclophilin [Populus tremula x Populus alba] >gi|41387716|gb|AAS01735.1| putative cyclophilin [Populus tremula x Populus alba]	PNPFFDMTVGGQPVGRIVMELFADVVPRTAENFRALCTGEKGVGRLGKPLHFKGSSFHRVIPNFMCQGGDFTAGNGTGGESIYGAKFADENFVRKHTGPGVLSMANAGPGTNGSQFFICTVKTEWLDGKHVVFGQVVEGMDVVKAIEKVGS	222	19271	7	7	0.153	*	0.439		0.157	*	0.373		1.783		0.159		0.05	*
499	623	gi|219908399|emb|CAX03474.1|	unnamed protein product [Medicago truncatula] >gi|257656769|emb|CBD08455.1| unnamed protein product [Medicago truncatula]	MANSLSFLMLLSLLAFAPFCLCHKKMGSYLYPQFYDYSCPQAQNIVKSILANAVAKEPRIAASLLRLHFHDCFVKGCDASILLDNSGSIISEKGSNPNRNSARGFEVIDEIKYALEKECPHTVSCADILAIAARDSTVLAGGPNWEVPLGRRDSLGASLSGSNNNIPAPNNTFQTILTKFKLQGLDIVDLVALSGSHTIGKSRCTSFRQRLYNQTGNGKQDFTLDQYYAAELRTQCPRSGGDQNLFFLDYVTPTKFDNNYFKNLLAYKGLLSSDEILLTKNQESAELVKLYAERNDLFFEQFAKSMIKMGNISPLTGSRGNIRTNCRVINTW	219	43494	4	4	252.572	*	---		2.457	*	165.569	*	0.702		1.799		5.719
500	624	gi|224069046|ref|XP_002326261.1|	predicted protein [Populus trichocarpa] >gi|222833454|gb|EEE71931.1| predicted protein [Populus trichocarpa]	MGSAGQNAWKLADHPKLPKGKTIAMVVLDGWGEAKPDQYNCIHVADTPTMDSFKTTAPERWRLIKAHGTAVGLPSEDDMGNSEVGHNALGAGRIFAQGAKLVDLALASGKIYDGEGFNYIKQSFDNGTLHLIGLLSDGGVHSRLDQLQLLLKGAAERGAKRIRVHFLTDGRDVLDGSSVGFVETLEKDLSNLREKAVDAQIASGGGRMYVTMDRYENDWNVVKRGWDAQVLGEAPYKFRSAVEAVEKLRAEPKANDQYLPPFVIVDESGNPVGPIKDGDAVVTFNFRADRMTMLAKALEYADFDKFDRVRVPKIHYAGMLQYDGELKLPSQYLVTPPEIERTSGEYLVHNGVRTFACSETVKFGHVTFFWNGNRSGYFNEEMEEYVEIPSDVGITFNVQ…	219	72097	9	2	---		1.501		1.576		---		0.918		0.875		---
506	631	gi|113649478|dbj|BAF29990.1|	Os12g0548300 [Oryza sativa Japonica Group] >gi|108862799|gb|ABG22043.1| Nucleoside diphosphate kinase 2, chloroplast precursor, putative, expressed [Oryza sativa Japonica Group] >gi|215697751|dbj|BAG91745.1| unnamed protein product [Oryza sativa Jap	MDAMAVLARTSRPAPTLLAATSPAVSRRPAAVSFAAAASPGSRGRVALSAAWGGRAARGRVSAAGRIVASSVEQSYIMIKPDGVQRGLVGEIISRFEKKGFVLKGLKLFQCPKDLAQEHYKDLKEKPFFPGLIEYITSGPVVCMAWEGNGVVASARKLIGATNPLQAEPGTIRGDLAVQTGRNVVHGSDSPDNGKREIALWFKEGELCEWESVLTPWLVE	216	27581	4	4
506	631	gi|125536940|gb|EAY83428.1|	hypothetical protein OsI_38642 [Oryza sativa Indica Group]	MAMLARTSRPAPTLLAATSPAVSRRPAAVSFAAAASPGSRGRVALSVAWGGRAARGRVSAAGRIVASSVEQSYIMIKPDGVQRGLVGEIISRFEKKGFVLKGLKLFQCPKDLAQEHYKDLKEKPFFPGLIEYITSGPVVCMAWEGNGVVASARKLIGATNPLQAEPGTIRGDLAVQTGRNVVHGSDSPDNGKREIALWFKEGELCEWESVLTPWLVE	216	27324	4	4
506	631	gi|125579646|gb|EAZ20792.1|	hypothetical protein OsJ_36416 [Oryza sativa Japonica Group]	MAVLARTSRPAPTLLAATSPAVSRRPAAVSFAAAASPGSRGRVALSAAWGGRAARGRVSAAGRIVASSVEQSYIMIKPDGVQRGLVGEIISRFEKKGFVLKGLKLFQCPKDLAQEHYKDLKEKPFFPGLIEYITSGPVVCMAWEGNGVVASARKLIGATNPLQAEPGTIRGDLAVQTGRNVVHGSDSPDNGKREIALWFKEGELCEWESVLTPWLVE	216	27264	4	4
506	631	gi|195605280|gb|ACG24470.1|	nucleoside diphosphate kinase 2 [Zea mays] >gi|194707740|gb|ACF87954.1| unknown [Zea mays]	METMSALARTAPPLAGTIRRPSCALRPTASLSFAAASTTPRGRLGLGLSTAPAGSGRAARARAVPRRIVASSEVEQSYIMIKPDGVQRGLVGEIISRFEKKGFLLKGLKLFQCPKDLAQEHYKDLKDKPFFPKLIDYITSGPVVCMAWEGDGVVASARKLIGATNPLQAEPGTIRGDLAVQTGRNVVHGSDSPDNGKREIELWFKEGEVCQWESVQAPWLIE	216	28471	4	4
506	631	gi|195637254|gb|ACG38095.1|	nucleoside diphosphate kinase 2 [Zea mays] >gi|226492231|ref|NP_001150161.1| nucleoside diphosphate kinase 2 [Zea mays]	METMSALARTAPPLAGTIRRPSCALRPTASLSFAAASTTPRGRLGLGLSTAPAGSGRAARARAVPQRIVASSEVERSYIMIKPDGVQRGLVGEIISRFEKKGFLLKGLKLFQCPKDLAQEHYKDLKDKPFFPKLIDYITSGPVVCMAWEGAGVVASARKLIGATNPLQAEPGTIRGDLAVQTGRNVVHGSDSPDNGKREIELWFKEGELCQWESVQAPWLIE	216	28441	4	4
506	631	gi|217075338|gb|ACJ86029.1|	unknown [Medicago truncatula]	MEAMGVFCGTNSIYVTSSQLRTSNTNTRSSQLRTTQHLSAFPSKSHLFSSSTSSSYAKTIRTKSSTNTGIFLPHLIASLEQVDRTYIMVKPDGVQRGLVGEIISRFEKKGFKLIGLKLFQCSKELAEEHYKDLNQRSFFPKLSEYITSGPVVSMAWEGVGVVPSARKLIGATNPLQAEPGTIRGDFAVETGRNVIHGSDSPENGEREIALWFKEGELCEWTPVLHPWLRE	216	29973	4	4
506	631	gi|229473559|gb|ACQ73319.1|	nucleoside diphosphate kinase II [Zea mays]	FIMIKPDGVQRGLVGEIISRFEKKGFLLKGLKLFQCPKDLAQEHYKDLKDKPFFPKLIDYITSGPVVCMAWEGDGVVASARKLIGATNPLQAEPGTIRGDLAVQTGRNVVHGT	216	16152	4	4
506	631	gi|242083744|ref|XP_002442297.1|	hypothetical protein SORBIDRAFT_08g017600 [Sorghum bicolor] >gi|241942990|gb|EES16135.1| hypothetical protein SORBIDRAFT_08g017600 [Sorghum bicolor]	METMAALARTAPPLAGSTRRPSCALRPTASLSFAAASTTPRGRLGLALSTASAGSGRAARARAVPRRIVASSEVEQSYIMIKPDGVQRGLVGEIISRFEKKGFLLKGLKLFQCPKDLAQEHYKDLKDKPFFPKLIDYITSGPVVCMAWEGDGVVASARKLIGATNPLQAEPGTIRGDLAVQTGRNVVHGSDSPDNGKREIALWFKEGELCQWESVQTPWLIE	216	28418	4	4
506	631	gi|294464762|gb|ADE77887.1|	unknown [Picea sitchensis]	MEAWMVSNAGRGGAFTTAAASAGGISWLPKYPQNNHDNHNSTVKGSLFCESYHPWRQRSMAIRSLGIGRKNTTHVGSLQPSQLRLALHGGLTLRKANASNRNPMNSYLFLTHLKASMEDVQQTYIMIKPDGVQRGLVGEIISRFEHKGFTLKGLKLFQCPTELAEEHYRDLKSKSFFPKLVKYITSGPVVCMAWEGPGIVAAARKLIGATNPLQAEPGTIRGDLAIQVGRNVVHGSDSQENGQREVALWFKDGELCEWTQEITPWLRE	216	34807	4	4
506	631	gi|42733490|dbj|BAD11342.1|	BRI1-KD interacting protein 114 [Oryza sativa Japonica Group]	VEQSYIMIKPDGVQRGLVGEIISRFEKKGFVLKGLKLFQCPKDLAQEHYKDLKEKPFFPGLIEYITSGPVVCMAWEGNGVVASARKLIGATNPLQAEPGTIRGDLAVQTGRNVVHGSDSPDNGKREIALWFKEGELCEWESVLTPWLVE	216	20657	4	4
510	635	gi|147790711|emb|CAN76515.1|	hypothetical protein [Vitis vinifera] >gi|225449601|ref|XP_002284061.1| PREDICTED: hypothetical protein [Vitis vinifera] >gi|225439880|ref|XP_002279090.1| PREDICTED: hypothetical protein [Vitis vinifera] >gi|297741553|emb|CBI32685.3| unnamed protein	MVRVSVLNDALKSMYNAEKRGKRQVMIRPSSKVIVKFLLVMQKHGYIGEFEYVDDHRSGKIVVELNGRLNKCGVISPRFDVGVKDIEPWTARLLPSRQFGYIVLTTSAGIMDHEEARRKNVGGKVLGFFY	214	18500	5	5
510	635	gi|192910724|gb|ACF06470.1|	cytoplasmic ribosomal protein S15a [Elaeis guineensis] >gi|192910726|gb|ACF06471.1| cytoplasmic ribosomal protein S15a [Elaeis guineensis]	MVRVSVLNDALKSMYNAEKRGKRQVMIRPSSKVIIKFLLVMQKHGYIGEFEYVDDHRAGKIVVELNGRLNKCGVISPRFDVGVKEIEPWTARLLPSRQFGYIVLTTSAGIMDHEEARRKNVGGKVLGFFY	214	18512	5	5
510	635	gi|193850547|gb|ACF22877.1|	putative ribosomal protein S15 [Glycine max] >gi|255626173|gb|ACU13431.1| unknown [Glycine max]	MVRVSVLNDALKSMYNAEKRGKRQVMIRPSSKVIIKFLLVMQKHGYIGEFEYVDDHRAGKIVVELNGRLNKCGVISPRFDVGVKEIEGWTARLLPSRQFGYIVLTTSAGIMDHEEARRKNVGGKVLGFFY	214	18472	5	5
510	635	gi|195635415|gb|ACG37176.1|	40S ribosomal protein S15a [Zea mays]	MVRVSVLNDALKSMYNAEKIGKRQVMIRPSSKVIIKFLTVMQRHGYIGEFEYVDDHRSGKIVVELNGRLNKCGVISPRFDIGVKDIEGWTARLLPSRQFGYIVLTTSAGIMDHEEARRKSVGGKVLGFFY	214	18130	5	5
510	635	gi|195659239|gb|ACG49087.1|	40S ribosomal protein S15a [Zea mays] >gi|219887895|gb|ACL54322.1| unknown [Zea mays] >gi|195652841|gb|ACG45888.1| 40S ribosomal protein S15a [Zea mays] >gi|194700340|gb|ACF84254.1| unknown [Zea mays] >gi|226498832|ref|NP_001146581.1| hypothetical p	MVRVSVLNDALKSMYNAEKIGKRQVMIRPSSKVIIKFLTVMQRHGYIGEFEYVDDHRAGKIVVELNGRLNKCGVISPRFDVGVKEIEGWTARLLPSRQFGYIVLTTSAGIMDHEEARRKNVGGKVLGFFY	214	18141	5	5
510	635	gi|219362577|ref|NP_001137078.1|	hypothetical protein LOC100217251 [Zea mays] >gi|194698256|gb|ACF83212.1| unknown [Zea mays]	MVMLFSLAWNPLQLYLFSSGKVSMVRVSVLNDALKSMYNAEKIGKRQVMIRPSSKVIIKFLTVMQRHGYIGEFEYVDDHRSGKIVVELNGRLNKCGVISPRFDIGVKDIEGWTARLLPSRQFGYIVLTTSAGIMDHEEARRKSVGGKVLGFFY	214	21047	5	5
510	635	gi|223527098|gb|EEF29279.1|	30S ribosomal protein S8, putative [Ricinus communis] >gi|255584778|ref|XP_002533107.1| 30S ribosomal protein S8, putative [Ricinus communis]	MVRVSVLNDALKCMYNAEKRGKRQVMIRPSSKVIIKFLLVMQKHGYIGEFEYVDDHRAGKIVVELNGRLNKCGVISPRFDVGVKEIEGWTARLLPSRQFGYIVLTTSAGIMDHEEARRKNVGGKVLGFFY	214	18545	5	5
510	635	gi|223532142|gb|EEF33949.1|	30S ribosomal protein S8, putative [Ricinus communis] >gi|255575122|ref|XP_002528466.1| 30S ribosomal protein S8, putative [Ricinus communis]	MVRVSVLNDALKSMYNAEKRGKRQVMIRPSSKVIIKFLLVMQKHGYIGEFEYVDDHRAGKIVVELNGRLNKCGVISPRFDIGVKEIEGWTARLLPSRQFGYIVLTTSAGIMDHEEARRKNVGGKVLGFFY	214	18486	5	5
510	635	gi|226494835|ref|NP_001146975.1|	40S ribosomal protein S15a [Zea mays] >gi|238012922|gb|ACR37496.1| unknown [Zea mays] >gi|242051529|ref|XP_002454910.1| hypothetical protein SORBIDRAFT_03g001290 [Sorghum bicolor] >gi|195610836|gb|ACG27248.1| 40S ribosomal protein S15a [Zea mays] >g	MVRVSVLNDALKSMYNAEKRGKRQVMIRPSSKVIIKFLTVMQRHGYIGEFEYVDDHRAGKIVVELNGRLNKCGVISPRFDVGVKEIEGWTARLLPSRQFGYIVLTTSAGIMDHEEARRKNVGGKVLGFFY	214	18184	5	5
510	635	gi|293337349|gb|ADE42970.1|	putative 40S ribosomal protein S15a [Gardenia jasminoides]	MVRVSVLNDALKSMYNAEKRGKRQVMIRPSSKVIIKFLLVMQKHGYIGEFEYVDDHRAGKIVDELNGRLNKCGVISPRFDIAVKDIEGWTARLLPSRQFGYIVLTTSAGIMDHEEARRKNAGGKVLGFFY	214	18474	5	5
510	635	gi|296086272|emb|CBI31713.3|	unnamed protein product [Vitis vinifera]	MSSYRSSNKIIILEIIKYKLYYEITYSCSLLWRRFCRSLRPCLVKMVRVSVLNDALKSMYNAEKRGKRQVMIRPSSKVIVKFLLVMQKHGYIGEFEYVDDHRSGKIVVELNGRLNKCGVISPRFDVGVKDIEPWTARLLPSRQFGYIVLTTSAGIMDHEEARRKNVGGKVLGFFY	214	25405	5	5
510	635	gi|307941401|gb|ADN96003.1|	40S ribosomal protein [Triticum aestivum]	MVRVSVLNDALKSMYNAEKRGKRQVMIRPSSKVIIKFLIVTQKHGYIGEFEYVDDHRSGKIVVELNGRLNKCGVISPRFDVGVKEIEGWTARLLPSRQFGYIVLTTSAGIMDHEEARRKNVGGKVLGFFY	214	18458	5	5
510	635	gi|49036493|sp|Q9AT34.3|RS15A_DAUCA	RecName: Full=40S ribosomal protein S15a >gi|13560779|gb|AAK30203.1|AF349962_1 cytoplasmic ribosomal protein S15a [Daucus carota]	MVRVSVLNDALKSMFNAEKRGKRQVMIRPSSKVVIKFLMVMQKHGYIGEFEYVDDHRSGKIVVELNGRLNKCGVISPRFDVGVKEIEPWTARLLPSRQFGYIVLTTSAGIMDHEEARRKNVGGKVLGFFY	214	18516	5	5
510	635	gi|77745497|gb|ABB02647.1|	unknown [Solanum tuberosum] >gi|76573307|gb|ABA46758.1| unknown [Solanum tuberosum] >gi|301641374|gb|ADK87348.1| 40S ribosomal protein S15a [Triticum aestivum]	MVRVSVLNDALKSMYNAEKRGKRQVMIRPSSKVIIKFLIVMQKHGYIGEFEYVDDHRSGKIVVELNGRLNKCGVISPRFDVGVKEIEGWTARLLPSRQFGYIVLTTSAGIMDHEEARRKNVGGKVLGFFY	214	18488	5	5
527	655	gi|297853126|ref|XP_002894444.1|	mucilage-modified 4 [Arabidopsis lyrata subsp. lyrata] >gi|297340286|gb|EFH70703.1| mucilage-modified 4 [Arabidopsis lyrata subsp. lyrata]	MDDTTTYKPKNILITGAAGFIASHVANRLIRSYPDYKIVVLDKLDYCSDLKNLDPSFSSPNFKFVKGDIASDDLVNYLLITENIDTIMHFAAQTHVDNSFGNSFEFTKNNIYGTHVLLEACKVTGQIRRFIHVSTDEVYGETDEDAAVGNHEASQLLPTNPYSATKAGAEMLVMAYGRSYGLPVITTRGNNVYGPNQFPEKMIPKFILLAMSGKPLPIHGDGSNVRSYLYCEDVAEAFEVVLHKGEIGHVYNIGTKRERRVIDVARDICKLFGKDPESSIQFVENRPFNDQRYFLDDQKLKKLGWQERTTWEDGLKKTMDWYTQNPEWWGDVSGALLPHPRMLMMPGGRLSDGSSEKKDASSNTVQTFTVVTPKGGGSGDKASLKFLIYGKTGWLGGLL…	206	90222	4	2	0.292		0.673	*	0.33		0.525	*	0.239		0.252	*	---
533	662	gi|147782460|emb|CAN61919.1|	hypothetical protein [Vitis vinifera]	MAWKSVKKDFSTAILERKKSPNRLVVDEAVNDDNSVVSMNPATMEKLQFFRGDTVLIKGKKRKDTVCIVLVDEQCEEPKIRMNKVVRANLRVRLGDVVSVHQCPDVKYGKRVHILPIDDTIEGVTGNLFDAYLKPYFLESYRPVRKGDLFLVRGGMRSVEFKVIETDPGEYCVVAPDTEIFCEGEPIKREDEERLNEVGYDDVGGVRKQMAQIRELVELPLRHPQLFKSIGVKPPKGILLYGPPGSGKTLIARAVANETGAFFFLINGPEIMSKLAGESESNLRKAFEEAEKNAPSIIFIDELDSIAPKREKTHGEVERRIVSQLLTLMDGLKTRAHVIVIGATNRPNSIDPALRRFGRFDREIDIGVPDEVGRLEVLRIHTKNMKLSDDVDLERVAKD…	202	106116	7	1
533	662	gi|222868614|gb|EEF05745.1|	predicted protein [Populus trichocarpa] >gi|224133614|ref|XP_002321618.1| predicted protein [Populus trichocarpa]	MEDPSSSQPSSSTDPKSGKKDFSTAILERKKSPNRLVVDEAINDDNSVVAMHPATMEKLQFFRGDTVLIKGKKRRDTVCIVLAEEQCEEPKIRMNKVVRANLRVCLGDVVSVHQCPDVKYGKRVHILPIDDTIEGVTGNLFDAYLKPYFLESYRPVRKDDLFLVRGGMRSVEFKVIETDPGEYCVVAPDTEIFCEGEPIKREDEERLNEVGYDDVGGVRKQMAQIRELVELPLRHPQLFKSIGVKPPKGILLYGPPGSGKTLIARAVANETGAFFFLINGPEIMSKLAGESESNLRKAFEEAEKNAPSIIFIDEIDSIAPKREKTHGEVERRIVSQLLTLMDGLKSRAHVIVMGATNRPNSIDPALRRFGRFDREIDIGVPDEVGRLEVLRIHTKNMKL…	202	107890	7	1
533	662	gi|223550471|gb|EEF51958.1|	Transitional endoplasmic reticulum ATPase, putative [Ricinus communis] >gi|255540583|ref|XP_002511356.1| Transitional endoplasmic reticulum ATPase, putative [Ricinus communis]	MADQGSSQPSSSSDPKSGKKDYSTAILERKKSPNRLVVDEAINDDNSVVSMHPDTMETLQLFRGDTVLIKGKKRKDTVCIVLADEQCEQPKIRMNKVVRANLRVRLGDVVSVHQCPDVKYGKRVHILPIDDTIEGVTGNIFDAYLKPYFLESYRPVRKGDLFLVRGGMRSVEFKVIETDPGEYCVVAPDTEIFCEGEPIKREDEERLNEVGYDDVGGVRKQMAQIRELVELPLRHPQLFKSIGVKPPKGILLYGPPGSGKTLIARAVANETGAFFFLINGPEIMSKLAGESESNLRKAFEEAEKNAPSIIFIDEIDSIAPKREKTHGEVERRIVSQLLTLMDGLKSRAHVIVMGATNRPNSIDPALRRFGRFDREIDIGVPDEVGRLEVLRIHTKNMKL…	202	105902	7	1
533	662	gi|224121826|ref|XP_002318682.1|	predicted protein [Populus trichocarpa] >gi|222859355|gb|EEE96902.1| predicted protein [Populus trichocarpa]	MKSSKKDYSTAILERKKSPNRLVIDEAINDDNSVVAMHPATMEKLQFFRGDTVLIKGKKRKDTVCIVLADEQCEEPKIRLNKVVRANLRVRLGDVVSVHQCPDVKYGKRVHILPIDDTIEGVTGSLFDAYLKPYFLESYRPVRKGDLFLVRGGMRSVEFKVIETDPGEYCVVAPDTEIFCEGEPIKREDEERLNEVGYDDVGGVRKQMAQIRELVELPLRHPQLFKSIGVKPPKGILLYGPPGSGKTLIARAVANETGAFFFLINGPEIMSKLAGESESNLRKAFEEAEKNAPSIIFIDELDSIAPKREKTHGEVERRIVSQLLTLMDGLKSRAHVIVMGATNRPNSIDPALRRFGRFDREIDIGVPDEVGRLEVLRIHTKNMKLAEDVDLERVAKDTH…	202	105864	7	1
533	662	gi|297733738|emb|CBI14985.3|	unnamed protein product [Vitis vinifera] >gi|225456951|ref|XP_002281671.1| PREDICTED: hypothetical protein [Vitis vinifera]	MADPSSSGPSSSPEVKSVKKDFSTAILERKKSPNRLVVDEAVNDDNSVVSMNPATMEKLQFFRGDTVLIKGKKRKDTVCIVLVDEQCEEPKIRMNKVVRANLRVRLGDVVSVHQCPDVKYGKRVHILPIDDTIEGVTGNLFDAYLKPYFLESYRPVRKGDLFLVRGGMRSVEFKVIETDPGEYCVVAPDTEIFCEGEPIKREDEERLNEVGYDDVGGVRKQMAQIRELVELPLRHPQLFKSIGVKPPKGILLYGPPGSGKTLIARAVANETGAFFFLINGPEIMSKLAGESESNLRKAFEEAEKNAPSIIFIDELDSIAPKREKTHGEVERRIVSQLLTLMDGLKTRAHVIVIGATNRPNSIDPALRRFGRFDREIDIGVPDEVGRLEVLRIHTKNMKL…	202	107143	7	1
556	687	gi|197916899|gb|ABS42984.2|	ascorbate peroxidase [Cucumis melo]	MGKCYPVVSEEYQKAIEKAKRKLRGFIAEKNCAPLMLRLAWHSAGTFDKESKTGGPFGTMRFSSELAHGANNGLDIAVRLLEPIKQQFPVLSYADFYQLAGVVAVGVTGGPEVPFHPGREDKPEPPPEGRLPDATKGSDHLRDVFYTMGLSDQDIVALSGGHTLGRAHKERSGFEGPWTTNPLIFDNSYFTELLTGEKEGLLQLVSDKALLSDPVFRPLVEKYAADEDAFFADYAEAHQKLSELGFADA	193	32589	4	4
556	687	gi|226897527|gb|ACO90193.1|	ascorbate peroxidase [Cucumis sativus]	MGKCYPVVSEEYQKAIEKAKRKLRGFIAEKNCAPLMLRLAWHSAGTFCKDSKTGGPFGTMRFKSELAHGANNGLDIAVRLLEPIKEQFPILSYADFYQLAGVVAVEVTGGPEVPFHPGREDKPEPPPEGRLPDATKGSDHLRDVFYTMGLSDQDIVALSGGHTLGRAHKERSGFEGPWTTNPLIFDKSYFTELLTGEKEGLLQLASDKALLSDPVFRPLVEKYAADEDAFFADYAEAHQKLSELGFADA	193	33343	4	4
556	687	gi|257352583|emb|CBB98557.1|	unnamed protein product [Cucumis sativus] >gi|257643540|emb|CBC89222.1| unnamed protein product [Cucumis sativus] >gi|257696294|emb|CBC70072.1| unnamed protein product [Cucumis sativus] >gi|219791837|emb|CAW32442.1| unnamed protein product [Cucumis	MGKCYPVVSEEYQKAIEKAKRKLRGFIAEKNCAPLMLRLAWHSAGTFCKDSKTGGPFGTMRFKSELAHGANNGLDIAVRLLEPIKEQFPILSYADFYQLAGVVAVEVTGGPDVPFHPGREDKPEPPPEGRLPDATKGSDHLRDVFYTMGLSDQDIVALSGGHTLGRAHKERSGFEGPWTTNPLIFDKSYFTELLTGEKEGLLQLASDKALLSDPVFRPLVEKYAADEDAFFADYAEAHQKLSELGFADA	193	33329	4	4
556	687	gi|315115497|gb|ADT80721.1|	ascorbate peroxidase [Cucumis sativus]	MGKCYPVVSEEYQKAIEKAKRKLRGFIAEKNCAPLMLRLAWHSAGTFCKDSKTGGPFGTMRFKSELAHGANNGLDIAVRLLEPIKEQFPILSYADFYQLAGVVAVEVTGGPDVPFHPGREDKPEPPPEGRLPDATKGSDHLRDVFYTMGLSDQDIVALSGGHTLGRAHKERSGFEGPWTTDPLIFDKSYFTELLTGEKEGLLQLASDKALLSDPVFRPLVEKYAADEDAFFADYAEAHQKLSELGFADA	193	33330	4	4
556	687	gi|33113424|gb|AAP94228.1|	ascorbate peroxidase [Citrullus lanatus subsp. vulgaris]	LSRLPGGPEVPFHPGREDKPEPPPEGRLPDATKGSDHLRDVFYTMGLSDQDIVALSGGHTLGRAHKERSGFEGPWTSNPLIFDNSYFTELLSGEKEGLLQLASDKALLSDPVFRPLVEKYAR	193	15547	4	4	---		2001.96		---		15292.4		4288.62		3925.43	*	---
556	687	gi|37020723|gb|AAQ88015.1|	ascorbate peroxidase [Cucumis sativus]	PGKCYPVVSEEYQKAIEKAKRKLRGFIAEKNCAPLMLRLAWHSAGTFCKDSKTGGPFGTMRFKSELAHGANNGLDIAVRLLEPIKEQFPILSYADFYQLAGVVAVEVTGGPDVPFHPGREDKPEPPPEGRLPDATKGSDHLRDVFYTMGLSDQDIVALSGGHTLGRAHKERSGFEGPWTTNPLIFDKSYFTELLTGEKEGLLQLASDKALLSDPVFRPLVEKYAADEDAFFADYAEAHQKLSELGFADA	193	33295	4	4
558	689	gi|118487642|gb|ABK95646.1|	unknown [Populus trichocarpa] >gi|224127848|ref|XP_002329192.1| light-harvesting complex II protein Lhcb5 [Populus trichocarpa] >gi|222870973|gb|EEF08104.1| light-harvesting complex II protein Lhcb5 [Populus trichocarpa]	MASLAASRAAASLGVSEMLGNPLNFSGATRSASPAASTPATFKTVALFSKKKPAPKPKPSAVSPADVELAKWYGPDRRIFLPDGLLDRSEIPEYLTGEVPGDYGYDPFGLSKKPDDFEKYQAFELIHARWAMLGAAGFIIPEAFNKFGANCGPEAVWFKTGALLLDGNTLNYFGKNIPINLVLAVVAEVILVGGAEYFRITNGLGFDDKLHPGGPFDPLGLAKDPDQAALLKVKEIKNGRLAMFAMLGFFFQAYVTGEGPVENLAKHLSDPFGNNLLTVIAGSAERAPSL	193	37046	5	5
558	689	gi|118489770|gb|ABK96685.1|	unknown [Populus trichocarpa x Populus deltoides]	MASLAASRAAASLGVSEMLGNPLNFSGATRSASPAATTPATFKTVALFSKKKAAPKPKPSAVSPADVELAKWYGPDRRIFLPDGLLDRSEIPEYLTGEVPGDYGYDPFGLSKKPDDFEKYQAFELIHARWAMLGAAGFIIPEAFNKFGANCGPEAVWFKTGALLLDGNTLNYFGKNIPINLVLAVVAEVILVGGAEYFRITNGLGFDDKLHPGGPFDPLGLAKDPDQAALLKVKEIKNGRLAMFAMLGFFLQAYVTGDVPWRTSQNISAILLATTCSLSLLVLLRELLLCDFTFLDVPLLII	193	38435	5	5
558	689	gi|226358407|gb|ACO51066.1|	chloroplast chlorophyll A-B binding protein [Gossypium hirsutum]	MASLAASTAAASLGVSEMLGNPLNFSGGARSSAPTPSNSSIFKTVALFSKKKAAPPKPKAAAVAPADEELAKWYGPDRRIFLPEGLLDRSEIPEYLNGEVPGDYGYDPFGLSKKPEDFAKYQAYELIHARWAMLGAAGFIIPEAFNKFGANCGPEAVWFKTGALLLDGNTLNYFGKNIPINLVVAVVAEVVLVGGAEYYRIINGLDLEDKLHPGGPFDPLGLAKDPDQAALLKVKEIKNG	193	31361	5	5
558	689	gi|257637140|emb|CBD03050.1|	unnamed protein product [Solanum lycopersicum] >gi|219985910|emb|CAW94044.1| unnamed protein product [Solanum lycopersicum] >gi|257686278|emb|CBC95944.1| unnamed protein product [Solanum lycopersicum] >gi|219967631|emb|CAW99841.1| unnamed protein pr	MAAATSLYVSEMLGSPVKFSGVARPAAPSPSSSATFKTVALFKKKAAAAPAKAKAAAVSPADDELAKWYGPDRRIFLPEGLLDRSEIPEYLNGEVPGEYGYDPFGLSKKPEDFAKYQAYELIHARWAMLGAAGFIIPEAFNKFGANCGPEAVWFKTGALLLDGNTLNYFGKNIPINLILAVVAEVVLVGGAEYYRIINGLDLEDKLHPGGPFDPLGLAKDPDQAAILKVKEIKNGRLAMFSMLGFFIQAYVTGQGPVENLAAHLSDPFGNNLLTVIGGASERVPTL	193	36659	5	5
558	689	gi|297734735|emb|CBI16969.3|	unnamed protein product [Vitis vinifera] >gi|147770824|emb|CAN76428.1| hypothetical protein [Vitis vinifera] >gi|225459918|ref|XP_002264295.1| PREDICTED: hypothetical protein [Vitis vinifera]	MASLAATTAASSLGVSEMLGNPLNFSGASRTAPSASSPATFKTVALFSKKKAAPAKAKPAPVSPADEELAKWYGPDRRIFLPEGLLDRSEIPAYLTGEVPGDYGYDPFGLSKKPEDFAKYQAYELIHARWAMLGAAGFIIPEAFNKFGANCGPEAVWFKTGALLLDGNTLNYFGKNIPINLIFAVVAEVVLVGGAEYYRIINGLDLEDKLHPGGPFDPLGLANDPDQAALLKVKEIKNGRLAMFAMLGFFIQAYVTGEGPVENLAAHLSDPFGNNLLTVIAGTAERAPTL	193	36338	5	5
561	693	gi|298205241|emb|CBI17300.3|	unnamed protein product [Vitis vinifera]	MTIQTAVLIETLTALGAEVRWCSCNIFSTQDHAAAAIARDSAAGVKAEEELVGVSEETTTGVKRLYQMQANGTLLFPAINVNDSVTKSKFDNLYGCRHSLPDGLMRATDVMIAGKVAVVCGYGDVGKGCAAALKQAGARDVVSEADIFVTTTGNKDIIMVDHMRKMKNNAIVCNIGHFDNEIDMLGLETYPGVKRITIKPQTDRWVAALHLGKLGAKLTKLSKDQADYISVPIEGPYKPPHYRY	191	32221	4	3	0.496		0.409	*	0.207		1.815	*	0.272		0.306		0.144
564	696	gi|116783314|gb|ABK22887.1|	unknown [Picea sitchensis]	MAALTQQLFLLSCATTSAPSSSPRSPISATTSPPNVLFLGTPLKLRTATSGTGRLQARRTAPVRATAAAANPKVEKLGIELKQLTLEEARSLVDWLQEELGVSAAAFAPAAVGAAPAAVAEAAPVVEEKTEFDVVIDEVPSNARIAVIKVIRSLTSLALKEAKDLIEGLPKKFKEGAGKEEAEEAKKKLEEVGAKVTIV	190	26009	4	4
564	696	gi|133088|sp|P24929.1|RK12_TOBAC	RecName: Full=50S ribosomal protein L12, chloroplastic; AltName: Full=CL12; Flags: Precursor >gi|20018|emb|CAA44214.1| ribosomal protein L12-1 [Nicotiana tabacum]	MASTLSTITLRSPSPSTASSTHASIPFPKKALEFPIRTPKLHHRRATFLRPLAAVEAPEKVVQLGDEISNLTLADAQKLVEYLQDKLGVTAASFAPAAVAAAPGAAAEAPAVVEEKTEFDVVIDEVPSNARIATIKAVRALTSLALKEAKELIEGLPKKFKEGVSKDEAEDAKKQLEEAGAKVSIA	190	25110	4	4
564	696	gi|20020|emb|CAA44226.1|	ribosomal protein L12-1a [Nicotiana tabacum]	MASTLSTITLRSPSPSTASSTHASIPFPKKALEFPIRTPKLHHRRATFLRPLAAVEAPEKVVQLGDEISNLTLADAQKLVEYLQDKLGVTAASFAPAAVAAAPGAAAEAPAVVEEKTEFDVVIDEVPSNARIATIKAVRALTSLALKEAKELIEGLPKKFKEGVSKDEAEDAKKQLEEAGAKVSIANLNFW	190	25785	4	4
564	696	gi|548746|sp|P36688.1|RK12_NICSY	RecName: Full=50S ribosomal protein L12, chloroplastic; AltName: Full=CL12; Flags: Precursor >gi|248303|gb|AAB21989.1| ribosomal protein L12 [Nicotiana sylvestris]	MASTLSTITLRSPSPSTATSTHASIPFPKKTLEFPIRTPKLQNRRATFLRPLAAVEAPEKVVQLGDEISNLTLADAQKLVEYLQDKLGVTAASFAPAAVVAAPGAAAEAPAVVEEKTEFDVVIDEVPSNARIATIKAVRALTSLALKEAKELIEGLPKKFKEGVSKDEAEDAKKQLEEAGAKVSIA	190	25150	4	4
564	696	gi|93280152|gb|ABF06704.1|	Joka20 [Nicotiana plumbaginifolia]	MASTLSTITLRSPSPSTATSTHASIPFPKKTLEFPIRTPKLHHRRATFLRPLAAVEAPEKVVQLGDEISNLTLADAQKLVEYLQDKLGVTAASFAPAAVVAAPGAAAEAPGVVEEKTEFDVVIDEVPSNARIATIKAVRALTSLALKEAKELIEGLPKKFK	190	21368	4	4
567	699	gi|219726082|emb|CAW50713.1|	unnamed protein product [Arabidopsis thaliana] >gi|257303197|emb|CBC26527.1| unnamed protein product [Arabidopsis thaliana] >gi|219770025|emb|CAW53961.1| unnamed protein product [Arabidopsis thaliana] >gi|257306001|emb|CBC20003.1| unnamed protein pr	MSLLKSRNRSSNINLQFRCVIICLRIGIIPRNVTVDAAAAAINFNEHSNMYSQNGKFSYGYASSPGKRSSMEDFYETRIDGVEGEIVGLFGVFDGHGGARAAEYVKQNLFSNLIRHPKFISDTTAAIADAYNQTDSEFLKSENSQNRDAGSTASTAILVGDRLLVANVGDSRAVICRGGNAIAVSRDHKPDQSDERQRIEDAGGFVMWAGTWRVGGVLAVSRAFGDRLLKQYVVADPEIQVLTFCQNLLLYIKNATLLLTIEHNLHWISIVSYLNGTLQNFLRSLISINGKFQEEKVDSSLEFLILASDGLWDVVSNEEAVGMIKAIEDPEEGAKRLMMEAYQRGSADNITCVVVRFFSDQAGGIGSSSTNIPIDHGIVPDRISGDSST	189	47079	4	4
567	699	gi|219769923|emb|CAW53910.1|	unnamed protein product [Arabidopsis thaliana] >gi|219725980|emb|CAW50662.1| unnamed protein product [Arabidopsis thaliana] >gi|257303095|emb|CBC26426.1| unnamed protein product [Arabidopsis thaliana] >gi|158939878|gb|ABW84225.1| putative protein ph	MGYLNSVLSSSSQVHSDDGPVSGGGLSQNGKFSYGYASSPGKRSSMEDFYETRIDGVEGEIVGLFGVFDGHGGARAAEYVKQNLFSNLIRHPKFISDTTAAIADAYNQTDSEFLKSENSQNRDAGSTASTAILVGDRLLVANVGDSRAVICRGGNAIAVSRDHKPDQSDERQRIEDAGGFVMWAGTWRVGGVLAVSRAFGDRLLKQYVVADPEIQEEKVDSSLEFLILASDGLWDVVSNEEAVGMIKAIEDPEEGAKRLMMEAYQRGSADNITCVVVRFFSDQAGGIGSSSTNIPIDHGIVPDRISGDSST	189	36688	4	4
567	699	gi|225430569|ref|XP_002263210.1|	PREDICTED: hypothetical protein [Vitis vinifera] >gi|296082179|emb|CBI21184.3| unnamed protein product [Vitis vinifera] >gi|147772246|emb|CAN67174.1| hypothetical protein [Vitis vinifera]	MGYISSVLSSSSQVHVDDGPVSGGGLSHNGKFSYGYASSPGKRSSMEDFYETRIDGVEGEIVGLFGVFDGHGGARAAEYVKQNLFSNLIRHPKFISDTKSAIADAYKHTDSEFLKSENNQNRDAGSTASTAILVGDRLLVANVGDSRAVICRGGNAIAVSRDHKPDQTDERQRIEDAGGFVMWAGTWRVGGVLAVSRAFGDRLLKQYVVADPEIQEEKIDSSLEFLILASDGLWDVVTNEEAVAMIKPIPDPEEAAKRLMQEAYQRGSADNITCVVVRFLANQGGSSLSSPA	189	35445	4	4
567	699	gi|257690511|emb|CBD05659.1|	unnamed protein product [Glycine max] >gi|219986450|emb|CAX01979.1| unnamed protein product [Glycine max]	MGYLNSVLSSSSQVHVADDAIVSGGGLSHNGKFSYGYASSPGKRSSMEDFYETRIDGVEGEIVGLFGVFDGHGGARAAEYVKKNLFSNLISHPKFISDTKSAITDAYNHTDTELLKSENSHNRDAGSTASTAILVGDRLLVANVGDSRAVICRGGNAIAVSRDHKPDQTDERQRIEEAGGFVMWAGTWRVGGVLAVSRAFGDRLLKQYVVADPEIQEEKVDSSLEFLILASDGLWDVVSNEEAVAMIKPIEDAEEAAKRLMQEAYQRGSADNITCVVVRFLMNQGGSKELVAYPHNSSSAGKNPSVEGLCDI	189	38254	4	4
569	702	gi|2253221|gb|AAB62882.1|	actin 4 [Podocarpus macrophyllus]	AGFAGFDAPRAVFPSIVGRPRHTGVMVGMGQRDSYVGDEAQAKRGVLTLKYPIEHGIVTNWDDMEKIWQHTFYNELRVAPEDCPTLLTEAPLNPKANREKMTQIMFENFGVPSVYVAIQAVLSLYASGLTTGIVLDSGDGVTTRDPIYEGYALPHAILRLDLAGRDLTDSFVKVLTERGYSFTTTAEREIVRDMKEKLAYVALDYKQELETAKSSSSIEKIYELPDGQLITVGAERFRCAEVLFQPPLIGMESVGVHEATYNSIIKCDVDIRKDLYGNVVLSGGSTMFPGTADRMSKEISTLAPSRMKIKVVAPPERKFSVWIGGSILASLCTFQQ	188	42783	9	1	---		---		---		---		---		---		---
571	704	gi|17368377|sp|P94026.1|RBCMT_TOBAC	RecName: Full=Ribulose-1,5 bisphosphate carboxylase/oxygenase large subunit N-methyltransferase, chloroplastic; AltName: Full=[Ribulose-bisphosphate carboxylase]-lysine N-methyltransferase; Short=RuBisCO LSMT; Short=RuBisCO methyltransferase; Short=	MASVFSVHPLPSSSFLCPLKTTKSRTKHHQTFYTYQKTILINSLQLTELDPKIPQPVQTFWQWLCKEGVVTTKTPVKPGIVPEGLGLVAKRDIAKGETVLQVPKRFWINPDAVAESEIGNVCSGLKPWISVALFLLREKWRDDSKWKYYMDVLPKSTDSTIYWSEEELSEIQGTQLLSTTMSVKDYVQNEFQKVEEEVILRNKQLFPFPITLDDFFWAFGILRSRAFSRLRNQNLILVPFADLTNHNARVTTEDHAHEVRGPAGLFSWDLLFSLRSPLKLKAGDQLFIQYDLNKSNADMALDYGFIEPSSARDAFTLTLEISESDEFYGDKLDIAETNGIGETAYFDIKIGQSLPPTMIPYLRLVALGGTDAFLLESIFRNSVWGHLGLPVSRANEELI…	186	65985	4	4
571	704	gi|255562948|ref|XP_002522479.1|	Ribulose-1,5 bisphosphate carboxylase/oxygenase large subunit N-methyltransferase, chloroplast precursor, putative [Ricinus communis] >gi|223538364|gb|EEF39971.1| Ribulose-1,5 bisphosphate carboxylase/oxygenase large subunit N-methyltransferase, chl	MATRFTLSSSTFLSPLKPFSPVTKIPSFHLKKPFFITSSSLQSSATAPPQSLEIFWQWLSDQGVVSGKSPAKPGVVKEGLGLIAERDIARNEVVLEIPKKLWINPDAVAASDIGNVCSGLKPWISVALFLIREKLKKEGSTWWPYLDILPDTTNSTIYWWVLLVAFYVLVLSFQRRSEEELAELQGTQLLRTTLGVKEYMQREFAKVEEEILLPHKELFPSPITLDDFLWAFGILRSRAFSRLRGQNLVLIPLADLINHSPDITTEDYAYEIKGGGLFSRELLFSLRSPISVKSGEQVLIQYDLNKSNAELALDYGFIEKTPDRNTYTLTLQISESDPFFGDKLDIAETNGSGETADFDIVLGNPLPPAMLPYLRLVALGGTDAFLLESIFRNTIWGHL…	186	65597	4	4
588	721	gi|113649389|dbj|BAF29901.1|	Os12g0514500 [Oryza sativa Japonica Group] >gi|115488790|ref|NP_001066882.1| Os12g0514500 [Oryza sativa Japonica Group] >gi|108862739|gb|ABG22029.1| Hsp90 protein, expressed [Oryza sativa Japonica Group]	MLGASRRSVCTAAAAAAAGSRRRAAAGVASAVSGDSSVSSSSAPPRSVINGEPGVPQLQKRLLSVLAAPKLTGTDNAASLKLREGSLVGRRYESSAAAVDSSDTPPVEKHEYQAEVNRLMDLIVHSLYSNKEVFLRELVSNASDALDKLRYLSVTDPDLIKDGAGLDIRIQTDKENGIITITDTGIGMTRQELVDSLGTIASSGTAKFLKALKESQEAGVDSNLIGQFGVGFYSAFLVSDKVAVSTKSPKSDKQYVWEGEAESSSYTIREETDPEKLLPRGTRLTLYLKREDKGFAHPEKIQKLVKNYSQFVSFPIYTWQEKGYTKEVEVDEPVEAKEGDDETKTEVKKKTKTVVEKYWDWELTNETQPIWLRNPREVSTEEYNEFYKKTFNEYMDPLA…	180	112147	5	1
588	721	gi|218186950|gb|EEC69377.1|	hypothetical protein OsI_38512 [Oryza sativa Indica Group]	MLGASRRSVCTAAAAAAAGSRRRAAAGVASAVSGDSSVSSSSAPPRSVINGEPGVPQLQKRLLSVLAAPKLTRTDNAASLKLREGSLVGRRYESSAAAVDSSDTPPVEKHEYQAEVNRLMDLIVHSLYSNKEVFLRELVSNASDALDKLRYLSVTDPDLIKDGAGLDIRIQTDKENGIITITDTGIGMTRQELVDSLGTIASSGTAKFLKALKESQEAGVDSNLIGQFGVGFYSAFLVSDKVAVSTKSPKSDKQYVWEGEAESSSYTIREETDPEKLLPRGTRLTLYLKREDKGFAHPEKIQKLVKNYSQFVSFPIYTWQEKGYTKEVEVDEPVEAKEGDDETKTEVKKKTKTVVEKYWDWELTNETQPIWLRNPREVSTEEYNEFYKKTFNEYMDPLA…	180	112246	5	1
588	721	gi|222617173|gb|EEE53305.1|	hypothetical protein OsJ_36277 [Oryza sativa Japonica Group]	MSRGRSPEPLDFFIWTVEDVGLWLEEINLGSYRQVFEENGVNGEYLESLSMFTTEQILRFIRRCHMKWGDFITLCKELRRIKVLLCKHFRNNGDEDTSKSGLPERGARSPQAMVGAVMPIGGVREGGQAEPAVPSRLPEAGALVPIHRLKSLRIRRSTPPSSSSWWRRHCNRTPLVINGEPGVPQLQKRLLSVLAAPKLTGTDNAASLKLREGSLVGRRYESSAAAVDSSDTPPVEKHEYQAEVNRLMDLIVHSLYSNKEVFLRELVSNASDALDKLRYLSVTDPDLIKDGAGLDIRIQTDKENGIITITDTGIGMTRQELVDSLGTIASSGTAKFLKALKESQEAGVDSNLIGQFGVGFYSAFLVSDKVAVSTKSPKSDKQYVWEGEAESSSYTIREE…	180	129746	5	1
588	721	gi|224028307|gb|ACN33229.1|	unknown [Zea mays]	MLGASRRSLSAAAAARSRVAAGAASAVSADAAASIPPRPASNGAPGVHQQQKRLLSVLVAPKVAGTSNVVSLKLMGGALTGRRYESSAAAVDSTDPPAEKHEYQAEVNRLMDLIVHSLYSNKEVFLRELVSNASDALDKLRYLSVTDPELLKDGPQLDIRIQTDKDNGIITITDSGIGMTKQELIDSLGTIASSGTAKFLKALKESQEAGMDNNLIGQFGVGFYSAFLVSEKVVVSTKSPKSDKQYVWEGQADSGSYTIREEKDPEQLIPRGTRLTLYLKCDDKGFAHPERIQKLLKTYSQFVSFPIYTWEEKGFTKEVEVDEDPAEAQKKGDDSAETKTEPKKKTKTVIEKYWDWELSNETQPIWLRNPKEVSTEEYNDFFKKTFNEYLGPLASSHFT…	180	110877	5	1
588	721	gi|225447572|ref|XP_002270014.1|	PREDICTED: hypothetical protein [Vitis vinifera]	MEIVNASPEASSTRLQNPTKTLERPNPHFIYLVSEQKVYQSLHFQLPAMHRLSRRSIAVLRTTGAARRTAPAPITPASPFNDSVGQNDAKLRWYSVLASGRSDAGRNSTQLNLRNGLLLGNRYESTAAASDASDPPAEKFEYQAEVSRLMDLIVHSLYSNKEVFLRELISNASDALDKLRFLSVTEPQLLKDGLDLDIRIQTDKDNGIIHLTDSGIGMTRQELVDCLGTIAQSGTAKFLKAVKESKDSGADSNLIGQFGVGFYSAFLVSDRVVVSTKSPKSDKQYVWEGKADASSYTIREETDPEKLIPRGTRLTLYLKRDDKDFAHPERVQKLVKNYSQFVSFPIYTWQEKGYTKEVEVEEDPAEAKKDEQDEKAEKKKKTKTVVERYWDWEQTNETQ…	180	116291	5	1
588	721	gi|226502358|ref|NP_001152363.1|	LOC100286003 [Zea mays] >gi|195655521|gb|ACG47228.1| heat shock protein 83 [Zea mays]	MLGASRRSLSAAAAARSRVAAGAASAVSADAAASIPPRPASNGAPGVHQQQKRLLSVLVAPKVAGTSNVVSLKLMGGALTGRRYESSAAAVDSTDPPAEKHEYQAEVNRLMDLIVHSLYSNKEVFLRELVSNASDALDKLRYLSVTDPELLKDGPQLDIRIQTDKDNGIITITDSGIGMTKQELIDSLGTIASSGTAKFLKALKESQEAGMDNNLIGQFGVGFYSAFLVSEKVVVSTKSPKSDKQYVWEGQADSGSYTIREEKDPEQLIPRGTRLTLYLKCDDKGFAHPERIQKLLKTYSQFVSFPIYTWEEKGFTKEVEVDEDPAEAQKKGDDSAETKTEPKKKTKTVIEKYWDWELSNETQPIWLRNPKEVSTEEYNDFFKKTFNEYLGPLASSHFT…	180	72052	5	1
588	721	gi|242085674|ref|XP_002443262.1|	hypothetical protein SORBIDRAFT_08g016560 [Sorghum bicolor] >gi|241943955|gb|EES17100.1| hypothetical protein SORBIDRAFT_08g016560 [Sorghum bicolor]	MIGASRRSLSAAAAAAARSRVAASAASAVSADADASSVPPRPVSNGAPGVPQQQKRLLSVLAAPKVAGTSNVVSLKLMDGALIGRRYESSAAAVDSTDLPAEKHEYQAEVNRLMDLIVHSLYSNKEVFLRELVSNASDALDKLRYLSVTDPELLKDGPQLDIRIQTDKDNGIITITDSGIGMTKQELIDSLGTIASSGTAKFLKALKESQEAGMDSNLIGQFGVGFYSAFLVSEKVVVSTKSPKSDKQYVWEGQADSGSYTIREENDPEKLIPRGTRLTLYLKRDDKGFAHPERIQKLLKNYSQFVSFPIYTLQEKGFTKEVEVDEDPAEAQKEGDELMSLCTQPKKKTKTVVEKYWDWELANETQPIWLRNPKEVSTEEYNEFYKKTFNEYLDPLASS…	180	110780	5	1
588	721	gi|296085007|emb|CBI28422.3|	unnamed protein product [Vitis vinifera]	MLVSFLSLSFTRFQSQHQSPELFLLILLNASPEASSTRLQNPTKTLERPNPHFIYLVSEQKVYQSLHFQLPAMHRLSRRSIAVLRTTGAARRTAPAPITPASPFNDSVGQNDAKLRWYSVLASGRSDAGRNSTQLNLRNGLLLGNRYESTAAASDASDPPAEKFEYQAEVSRLMDLIVHSLYSNKEVFLRELIRHVTSYYNASDALDKLRFLSVTEPQLLKDGLDLDIRIQTDKDNGIIHLTDSGIGMTRQELVDCLGTIAQSGTAKFLKAVKESKDSGADSNLIGQFGVGFYSAFLVSDRVVVSTKSPKSDKQYVWEGKADASSYTIREETDPEKLIPRGTRLTLYLKRDDKDFAHPERVQKLVKNYSQFVSFPIYTWQEKGYTKEVEVEEDPAEAKK…	180	119914	5	1
592	726	gi|147805559|emb|CAN65023.1|	hypothetical protein [Vitis vinifera]	MAKPVSIEVWNPCGKYRVVSTKPMPGTRWIDLLVQQDCRVEICTQKKTILSVEDIIALIGDKCDGVIGQLTEDWGETLFSALSRAGGRAFSNMAVGYNNVDVNAANKYGVAVGNTPGVLTETTAELAASLSMAAARRIVEADEFMRAGLYDGWLPHLFVGNLLRGQTVGVIGAGRIGSAYARMMVEGFKMNLIYYDLYQATRLEKFVTAYGQFLKASGEQPVTWKRAASMDEVLREADLISLHPVLDKTTYHLVNKERLSMMKKEAILINCSRGPVIDEVALVAHLKENPMFRVGLDVFEDEPYMKPGLAEMKNAIVVPHIASASKWTREGMATLAALNVLGKIKGYPIWHDPNKVEPFLNENSLPPAASPSIVNAKALVACFKAM	178	50260	7	1	---		---		---		---		---		---		---
592	726	gi|225428049|ref|XP_002279281.1|	PREDICTED: hypothetical protein [Vitis vinifera] >gi|297744600|emb|CBI37862.3| unnamed protein product [Vitis vinifera]	MAKPVSIEVWNPCGKYRVVSTKPMPGTRWIDLLVQQDCRVEICTQKKTILSVEDIIALIGDKCDGVIGQLTEDWGETLFSALSRAGGRAFSNMAVGYNNVDVNAANKYGVAVGNTPGVLTETTAELAASLSMAAARRIVEADEFMRAGLYDGWLPHLFVGNLLRGQTVGVIGAGRIGSAYARMMVEGFKMNLIYYDLYQATRLEKFVTAYGQFLKASGEQPVTWKRAASMDEVLREADLISLHPVLDKTTYHLVNKERLSMMKKEAILINCSRGPVIDEVALVAHLKENPMFRVGLDVFEDEPYMKPGLAEMKNAIVVPHIASASKWTREGMATLAALNVLGKIKGYPIWHDPNKVEPFLNENSLPPAASPSIVNAKALGLPVSKL	178	50147	7	1
596	730	gi|147854971|emb|CAN80262.1|	hypothetical protein [Vitis vinifera] >gi|225457971|ref|XP_002275563.1| PREDICTED: hypothetical protein isoform 1 [Vitis vinifera]	MAPSTLTALVEEKTLQQSFVRDEDERPKVAYNQFSNEIPVISLAGIDESEGRRSEICRKIVEACEDWGIFQVVDHGVDANLVSDMTRLAREFFALPAEEKLRFDMSGGKKGGFIVSSHLQGEAVQDWREIVTYFSYPLRTRDYSRWPDKPEGWRAVTEVYSEKLMGLACKLLEVLSEAMDLDKEALTKACVDMDQKVVVNYYPKCPQPDLTLGLKRHTDPGTITLLLQDQVGGLQATRDGGKTWITVQPVEGAFVVNLGDHGHYLSNGRFKNADHQAVVNSDCSRLSIATFQNPAPEAVVYPLKIREGEKSVMEEPITFAEMYRRKMSKDLELARLKKLAKQQDQQERKPKGIEEILA	178	48641	8	1	---		---		---		---		---		---		---
596	730	gi|225457969|ref|XP_002275589.1|	PREDICTED: hypothetical protein isoform 2 [Vitis vinifera]	MAPSTLTALVEEKTLQQSFVRDEDERPKVAYNQFSNEIPVISLAGIDESEGRRSEICRKIVEACEDWGIFQVVDHGVDANLVSDMTRLAREFFALPAEEKLRFDMSGGKKGGFIVSSHLQGEAVQDWREIVTYFSYPLRTRDYSRWPDKPEGWRAVTEVYSEKLMGLACKLLEVLSEAMDLDKEALTKACVDMDQKVVVNYYPKCPQPDLTLGLKRHTDPGTITLLLQDQVGGLQATRDGGKTWITVQPVEGAFVVNLGDHGHVSSDSLLIPLLGGQYLSNGRFKNADHQAVVNSDCSRLSIATFQNPAPEAVVYPLKIREGEKSVMEEPITFAEMYRRKMSKDLELARLKKLAKQQDQQERKPKGIEEILA	178	50021	8	1
596	730	gi|302142662|emb|CBI19865.3|	unnamed protein product [Vitis vinifera]	MSGGKKGGFIVSSHLQGEAVQDWREIVTYFSYPLRTRDYSRWPDKPEGWRAVTEVYSEKLMGLACKLLEVLSEAMDLDKEALTKACVDMDQKVVVNYYPKCPQPDLTLGLKRHTDPGTITLLLQDQVGGLQATRDGGKTWITVQPVEGAFVVNLGDHGHYLSNGRFKNADHQAVVNSDCSRLSIATFQNPAPEAVVYPLKIREGEKSVMEEPITFAEMYRRKMSKDLELARLKKLAKQQDQQERKPKGIEEILA	178	35516	8	1
597	731	gi|159147191|gb|ABW90990.1|	LHCB4 [Bambusa oldhamii]	MASSVAAAASTFLGTRLADPAPQNGRIVARFGFGGKKAAPKKAARTSTSDRPLWFPGAVAPEYLDGSLVGDYGFDPIGLGKPAEYLQYDLDSLDQNLAKNVAGDIIGTRFEPGEVKSTPFQPYTEVFGLQRFRECELIHGRWAMLATLGALSVEWLTGVTWQDAGKVELENGSSYLGQPLPFSMTTLIWIEVLLIGYIEFQRNAELDPEKRLYPGGSYFDPLGLASDPEKKERLQLAEIKHARLAMVGFLGFAVQAAATGKGPLNNWATHLSDPLHTTIFDTFSSSS	178	35474	4	4
597	731	gi|160713961|gb|ABX47016.1|	chloroplast chlorophyll a/b binding protein cab-PhE7 [Phyllostachys edulis]	MASSVAAAASTFLGTRLADPAPQNGRIVARFGFGRKKAAPKKAARTSTSDRPLWFPGAVAPDYLDGSLVGDYGFDPFGLGKPAEYLQFELDSLDQNLAKNDAGDIIGTRFEPGEVKSTPFQPYTEVFGLQRFRECELIHGRWAMLATLGALSVEWLTGVTWQDAGKVELVDGSSYLGQPLPFSMTTLIWIEVLLIGYIEFQRNAELDSEKRLYPGGSYFDPLGLASDPEKKERLQLAEIKHARLAMVGFLGFAVQAAATGKGPLNNWATHLSDPLHTTIFDTFSSSS	178	35568	4	4
597	731	gi|297829418|ref|XP_002882591.1|	LHCB4.2 [Arabidopsis lyrata subsp. lyrata] >gi|297328431|gb|EFH58850.1| LHCB4.2 [Arabidopsis lyrata subsp. lyrata]	MAATSTAASASSIMGTRVVSDISSGSTRFTAWFGFGTKKAAPKKAKTVISDRPLWFPGAKSPEYLDGSLVGDYGFDPFGLGKPAEYLQFDLDSLDQNLAKNLAGDVIGTRTEAVDPKSTPFQPYSEVFGLQRFRECELIHGRWAMLATLGAITVEWLTGVTWQDAGKVELVDGSSYLGQPLPFSISTLIWIEVLVVGYIEFQRNAELDSEKRLYPGGKFFDPLGLASDPEKKAQLQLAEIKHARLAMVGFLGFAVQAAATGKGPLNNWATHLSDPLHTTIIDTFSSS	178	36299	4	4
597	731	gi|4689382|gb|AAD27878.1|AF139466_1	chlorophyll a/b binding protein CP29 [Vigna radiata]	MATATATAAATSSFMGTRLLDAHSGSGRIQARFGFGSKKKAAPKKVSKGPSTDRPLWYPGAKAPEWLDGSLVGDYGFDPFGLGKPAEYLQFELDSLDQNLAKNEAGIIIGTRTEVADVKSTPFQPYSEVFGLQRFRECELIHGRWAMLATLGALSVEWLTGVTWQDAGKVELVEGSSYLGQPLPFSITTLIWIEVLVIGYIEFQRNAELDPEKRLYPGGSYFDPLGLASDPEKKATLQLAEIKHARLAMVGFLGFAVQAAATGKGPLNNWATHLSDPLHTTIIDTFSSSS	178	36612	4	4	---		0.975		0.596		0.49	*	6.014	*	1.107		1.213	*
597	731	gi|4741954|gb|AAD28774.1|AF134127_1	Lhcb4.2 protein [Arabidopsis thaliana] >gi|15231990|ref|NP_187506.1| LHCB4.2 (light harvesting complex PSII); chlorophyll binding [Arabidopsis thaliana] >gi|38503262|sp|Q9XF88.1|CB4B_ARATH RecName: Full=Chlorophyll a-b binding protein CP29.2, chloro	MAATSTAAAASSIMGTRVVSDISSNSSRFTARFGFGTKKASPKKAKTVISDRPLWFPGAKSPEYLDGSLVGDYGFDPFGLGKPAEYLQFDLDSLDQNLAKNLYGEVIGTRTEAVDPKSTPFQPYSEVFGLQRFRECELIHGRWAMLATLGAITVEWLTGVTWQDAGKVELVDGSSYLGQPLPFSISTLIWIEVLVIGYIEFQRNAELDSEKRLYPGGKFFDPLGLASDPVKKAQLQLAEIKHARLAMVGFLGFAVQAAATGKGPLNNWATHLSDPLHTTIIDTFSSS	178	36403	4	4
601	735	gi|115479163|ref|NP_001063175.1|	Os09g0415800 [Oryza sativa Japonica Group] >gi|113631408|dbj|BAF25089.1| Os09g0415800 [Oryza sativa Japonica Group]	MTFSGMDIALKASTHSSTSQQHWLHSTRYRCQYGLGSTHLNGRKRSPMVLSVRAVSGKSDLDFSDPSWKEKYQEDWNRRFSLPHITDIYDLKPRLTTFSLKKNRTDGGSLSADKWNGYVNKDDRALLKVIKYASPTSAGAECVDPDCSWVEHWIHRAGPRKEIYYEPAEVKAAIVTCGGLCPGLNDVIRQIVFTLEIYGVKNIVGIQFGYRGFFEKGLKEMPLSRKVVENINLSGGSFLGVSRGGAKTSEIVDSIQARRIDMLFVIGGNGSHAGANAIHEECRKRKLKVSVVAVPKTIDNDILFMDKTFGFDTAVEEAQRAINSAYIEARSAYHGIGLVKLMGRSSGFIAMQASLSSGQIDVCLIPEVSFTLDGEHGVMRHLEHLLEKKGFCVVCVAEG…	176	69397	4	4
601	735	gi|147834593|emb|CAN60905.1|	hypothetical protein [Vitis vinifera]	MASASLIYAVNFINPPKCILHSKRDYFSFNMSYTCTKSKTSQRQMRNKQSRMATIAAGNQEMDFTDPCWKTKFQEDFELRFNLPHLKDVLPIKPRPTTFSLKNRNAQLVNGANVLEDRKNGYVNEDDRALLKVIRYSSPTSAGAECIDPDCSWVEQWVHRAGPREEIFFEPGEVKAGIVTCGGLCPGLNDVIRQIVFTLELYGVKKIVGIQYGYRGLFDRGLAEIELFREVVQNINLAGGSLLGVSRGGADISEIVDSIQARGIDMIFILGGNGTHAGANAIHNECRRRKMKVSVICVPKTIDNDILLMDKTFGFDTAVEEAQRAINSAYIECISWHRACKTDGKKQRLYSNARFAFKRYHFKLRDLIGVLRHLEHLIETKGSAVLCVAEGAGQDFVEK…	176	212037	4	4
601	735	gi|162672676|gb|EDQ59210.1|	predicted protein [Physcomitrella patens subsp. patens] >gi|168047117|ref|XP_001776018.1| predicted protein [Physcomitrella patens subsp. patens]	ERRARRAGPRAWIYFNPEQVKAAIVTCGGLCPGLNDVIRQVVFTLETYGVNHILGIQYGFKGFVDKNYPPIKLSRKLVKTINMEGGSFLGVSRGCPPLKDIVDRLEEWNINMFYVIGGNGSHAGATAIYEQCEKRKMKMVVVGIPKTIDNDIEILDKTFGFDTAVEEAQRAINAAYTEASSAYNGVGIVKLMGRQSGYITMYATIASGQVDIVLIPEEILLTAFDLSSFFSNLLPASFEMLVTFTMGGKHGVLEYMKQKIELNGICVVVVAEGAGQDLLEGVGGLDASGNPILGDFGKWFTGKVKEFFATQKIPIDAKYIDPTYMIRARVCNSGDHIFCSILGQNAVHGAFAGYTNITIGVVNTHYCFLPIPIVIKKPRMVDPNSVMYHRCVTSTGQPD…	176	55681	4	4
601	735	gi|168051276|ref|XP_001778081.1|	predicted protein [Physcomitrella patens subsp. patens] >gi|162670520|gb|EDQ57087.1| predicted protein [Physcomitrella patens subsp. patens]	MKQIYIHDDDRVLIKVVHFGHPSSVGIELEDDGEWHESSRVRRAGPRAWIYFEPPSVRAAIVTCGGLCPGLNDVVRQIVLTLEVYGVKEILGIQYGFKGFVDKRYPPIMLTRKTVQRINMVGGSFLGVSRGCPPVEDIVSKLEEWHVNMFFVIGGNGSHAGANTIYQHVEKRKMKLVVVGIPKTIDNDIQILDKTFGFDTAVEEAQRAINAAYVEASSAFNGVGIVKLMGRQSGYISMYATIASGQVDAVLIPEVLHMHLKSLYYLNVPFQLEGEYGVLEFMHKRLKKNGIAVVVIAEGAGQDMMGGGGGTDASGNPILGDIGKFFYDKVKSHFGAKKFPVDVKYIDPTYMIRARACNSSDHIFCSILGQNAVHGAFAGYTNITVGVVNTHYCFLPIPE…	176	70315	4	4
601	735	gi|218201207|gb|EEC83634.1|	hypothetical protein OsI_29365 [Oryza sativa Indica Group]	MAVSLKSSGSFCSTPPQWLHSTRDRILYGYSHSNAKECTCKKTKRPAPLCVKATSTKVELDFNDPSWKQKFQEDWDKRFNLPRITDIYDLKPRPTTFSLKKNRSPAGDENGTPMDKWNGYVNSDDRALLKVIKYSSPNSAGAECIDPDCSWVEQWVHRAGPRKEIYYEPEEVKAAIVTCGGLCPGLNDVIRQIVFTLETYGVKNIVGIPFGYRGFFEKGLKEMPLSRHLVENINLAGGSFLGVSRGGAKTSEIVDSIQARRIDMLFVLGGNGTHAGANAIHEECQKRKLKVSVVAVPKTIDNDILLMDKTFGFDTAVEEAQRAINSAYIEARSAYHGIGLVKLMGRSSGFIAMHASLSSGQVDVCLIPEVPFTLDGEYGVLRHLEHLLKTKGFCVVCVA…	176	70459	4	4
601	735	gi|218202146|gb|EEC84573.1|	hypothetical protein OsI_31367 [Oryza sativa Indica Group]	MLVAGSVCHPSGTCSSAGIPGLARPKIWRALPRRLLGRRVGGNRLVGPHMTFSGMDIALKASTHSSTSQQHWLHSTRYRCQYGLGSTHLNGRKRSPMVLSVRAVSGKSDLDFSDPSWKEKYQEDWNRRFSLPHITDIYDLKPRLTTFSLKKNRTDGGSLSADKWNGYVNKDDRALLKVIKYASPTSAGAECVDPDCSWASAPGLNDVIRQIVFTLEIYGVKNIVGIQFGYRGFFEKGLKEMPLSRKVVENINLSGGSFLGVSRGGAKTSEIVDSIQARRIDMLFVIGGNGSHAGANAIHEECRKRKLKVSVVAVPKTIDNDILFMDKTFGFDTAVEEAQRAINSAYIEARSAYHGIGLVKLMGRSSGFIAMQASLSSGQIDVCLIPEVSFTLDGEHGVM…	176	70853	4	4
601	735	gi|219884179|gb|ACL52464.1|	unknown [Zea mays] >gi|226502554|ref|NP_001145725.1| hypothetical protein LOC100279231 [Zea mays]	MMAAVLKTSGSFCSTQQQHFQQSRRDQFLHGSYSNFKHCKSKKIIKPAPLCARVTSSKVELDVKDPYWKQKFQEDWESRFDLPSITDIYDLKPRPTTFSLKKNRTLTGDENVDMWNGYVNNDDRALLKVIKYSSPTSAGAECVDLDCSWVEQWVHRAGPRKEIYYEPEEVKAAIVTCGGLCPGLNDVIRQIVFTLETYGVKNIVGIPFGYRGFFEKGLKEMPLSRGLVENINLNGGSFLGVSRGGAKTSEIVDSIQARRIDMLFVLGGNGTHAGANAIHEECRKRKLKVSVVAVPKTIDNDILLMDKTFGFDTAVEEAQRAINSAYIEARSAYHGIGLVKLMGRSSGFIAMHASLSSGQVDVCLIPEVPFTLDGEFGVLRQLEHLLKSKGFCVVCVAEA…	176	69715	4	4
601	735	gi|222640629|gb|EEE68761.1|	hypothetical protein OsJ_27460 [Oryza sativa Japonica Group]	MAVATCRIRLAQSPASFDKRMGLLLDDNHFELVHILIKMAVSLKSSGSFCSTPPQWLHSTRDRILYGYSHSNAKECTCKKTKRPAPLCVKATSTKVELDFNDPSWKQKFQEDWDKRFNLPRITDIYDLKPRPTTFSLKKNRSPAGDENGTPMDKWNGYVNSDDRALLKVIKYSSPNSAGAECIDPDCSWVEQWVHRAGPRKEIYYEPEEVKAAIVTCGGLCPGLNDVIRQIVFTLETYGVKNIVGIPFGYRGFFEKGLKEMPLSRHLVENINLAGGSFLGVSRGGAKTSEIVDSIQARRIDMLFVLGGNGTHAGANAIHEECRKRKLKVSVVAVPKTIDNDILLMDKTFGFDTAVEEAQRAINSAYIEARSAYHGIGLVKLMGRSSGFIAMHASLSSGQ…	176	75107	4	4
601	735	gi|222853216|gb|EEE90763.1|	predicted protein [Populus trichocarpa] >gi|224094979|ref|XP_002310313.1| predicted protein [Populus trichocarpa]	IDFSDPDWKTNYQRDFERRFNIPHITDIFPDADPIPSTFCLKMRTPVMEDFAGGYPSDEEWHGYINKNDRVLLKVIHYSSPTSAGAECIDPNCTWVEQWVHRAGPREKIYFKPEEVKAAIVTCGGLCPGLNDVIRQIVITLEIYGVKKIVGIPFGYRGFSDEGLSEMPLSRKVVQNVHLSGGSLLGVSRGGPSVSDIVDSMEERGINMLFVLGGNGTHAGANAIHNECRGRRMRVAVVGVPKTIDNDILMMDKTFGFDTAVEEAQRAINSAYIEAHSAYHGIGIVKLMGRDSGFIAMHASLASGQIDICLIPEVPFHLHGPLGVLRHLKFLIETKGSAVLCVAEGAGQNFLGRTNATDASGNTVLGDFGVHIQQETKKYFKEIGVHADVKYIDPTYMIR…	176	58655	4	4
601	735	gi|225452791|ref|XP_002278018.1|	PREDICTED: hypothetical protein [Vitis vinifera] >gi|296082897|emb|CBI22198.3| unnamed protein product [Vitis vinifera]	MATIAAGNQEMDFTDPCWKTKFQEDFELRFNLPHLKDVLPIKPRPTTFSLKNRNARLVNGANVLEDRKNGYVNEDDRALLKVIRYSSPTSAGAECIDPDCSWVEQWVHRAGPREEIFFEPGEVKAGIVTCGGLCPGLNDVIRQIVFTLELYGVKKIVGIQYGYRGLFDRGLAEIELFREVVQNINLAGGSLLGVSRGGADISEIVDSIQARGIDMIFILGGNGTHAGANAIHNECRRRKMKVSVICVPKTIDNDILLMDKTFGFDTAVEEAQRAINSAYIEARSAYHGIGLVKLMGRSSGFIAMHASLSSGQIDICLIPEVPFQIEGPYGVLRHLEHLIETKGSAVLCVAEGAGQDFVEKTNSTDASGNARLGDIGVYLQQQIKKHFRRIGVPADVKYI…	176	59698	4	4
601	735	gi|239950052|gb|ACS36758.1|	ATP-dependent phosphofructokinase [Camellia sinensis]	RQIVITLEIYGVKKIVGIPFGYRGFSEEGLSEMLLSRKVVQNVHLSGGSLLGVSRGGPNVSDIVDSMEARGINMLFVLGGNGTHAGANAIHNECRKRRLRVAVVGVPKTIDNDILLMDKTFGFDTAVEEAQRAINSAY	176	17091	4	4
601	735	gi|241925756|gb|EER98900.1|	hypothetical protein SORBIDRAFT_02g024680 [Sorghum bicolor] >gi|242049270|ref|XP_002462379.1| hypothetical protein SORBIDRAFT_02g024680 [Sorghum bicolor]	MTLSGMAVAFKASTSSTTQQHWPSPTKDRCQYGFTQLSRQKYRKKFAALHVTATSGKLDLDFTDPSWNQKYQEDWNRRFSLPHITDIYDLEPRRTTFSLKKNRIPLGDGDGSSADMWNGYVNKSDRALLKVIKYASPTSAGALCIDPDCSWVEHWVHRAGPRKEIYYEPEEVKAAIVTCGGLCPGLNDVIRQIVFTLEIYGVKNIVGIPFGYRGFFEKGLKEMSLSRDVVENINLSGGSFLGVSRGGAKTSEIVDSIQARRIDMLFVIGGNGSHAGANAIHEECRKRKLKVSVVAVPKTIDNDILFMDKTFGFDTAVEEAQRAINSAYIEARSAYHGIGLVKLMGRSSGFIAMHASLSSGQIDVCLIPEVSFTLDGEHGVLRHLEHLLNTKGFCVVCVA…	176	68992	4	4
601	735	gi|241941907|gb|EES15052.1|	hypothetical protein SORBIDRAFT_07g021500 [Sorghum bicolor] >gi|242081577|ref|XP_002445557.1| hypothetical protein SORBIDRAFT_07g021500 [Sorghum bicolor]	MASALKTNGSFCSTQQQQFLQSTTDQFLHGSSHLNFKHCKSKKTIKPAPLCVRATSSKVELDFHDPSWKQKFQEDWERRFNLPSITDIYDLKPRPTTFSLKKNRTLTGDENVDMWNGYVNNDDRALLKVIKYSSPTSAGAECIDPDCSWVEQWVHRAGPRKEIYYEPAEVKAAIVTCGGLCPGLNDVIRQIVFTLETYGVKNIVGIPFGYRGFFEKGLKEMPLSRGLVENINLNGGSFLGVSRGGAKTSEIVDSIQARRIDMLFVLGGNGTHAGANAIHEECRKRKLKVSVVAVPKTIDNDILLMDKTFGFDTAVEEAQRAINSAYIEARSAYHGIGLVKLMGRSSGFIAMHASLSSGQVDVCLIPEVPFTLDGEFGVLQHLEHLLKSKGFCVVCVAEA…	176	69503	4	4
601	735	gi|255579726|ref|XP_002530702.1|	phosphofructokinase, putative [Ricinus communis] >gi|223529758|gb|EEF31697.1| phosphofructokinase, putative [Ricinus communis]	MRTPVTEDFANGYPSDEEWHGYINNNDRVLLKVIHFSSPTSAGAECIDPDCTWVEQWVHRAGPREKIYFKPEEVKAAIVTCGGLCPGLNDVIRQIVITLEIYGVKKIVGIPFGYRGFSDNDLSEMPLSRKVVQNVHLSGGSLLGVSRGGPDVSDIVDSMEERGINMLFVLGGNGTHAGANAIHNECRKRRLRVAVVGVPKTIDNDILLMDKTFGFDTAVEEAQRAINSAYIEAHSAYHGIGIVKLMGRSSGFIAMHASLASGQIDICLIPEVPFHLHGPHGVLNHLKYLIETKGSAVVCVAEGAGQSFLQKTNATDASGNIVLGDFGVHLQQETKKYFKEIGVHADVKFIDPTYMIRACRANASDGILCTVLGQNAVHGAFAGYSGITVGICNTHYVYF…	176	53329	4	4
601	735	gi|294462721|gb|ADE76905.1|	unknown [Picea sitchensis]	MFVHNDDRVLLKVIKYATPSSAGAECVDPDCNFVHQWVHRAGPRPEIYFNPNEVKAAIVTCGGLCPGLNDVIRQIVITLEIYGVKNIVGISYGYRGLFDEHLPEIKLSRKVVQGAHLSGGSILGVSRGGGNVPDIVDSIQKRGINMLFVLGGNGTHAGANAIHNECRKRQMKVVVVGVPKTIDNDILLMDKTFGFDTAVEEAQRAINAAYIEAHSAYNGIGIVKLMGRHSGFIAMHASLASGQIDVCLIPEVPFTLDGPDGILRHLQNLMESKTSAVICVAEGAGQDLLEKINATDASGNVVLGDIGVYLQHQIKKYFKGINITADVKYIDPTYMIRACRANASDGILCTVLGQNAVHGAFAGFSGITVGICNTHYVYLPIPEVISYARSVDPNSRMWH…	176	50826	4	4
601	735	gi|297324458|gb|EFH54878.1|	phosphofructokinase family protein [Arabidopsis lyrata subsp. lyrata] >gi|297821473|ref|XP_002878619.1| phosphofructokinase family protein [Arabidopsis lyrata subsp. lyrata]	MDALSQAITSGISSVPYKKNNSSLVPCHGLSSLILRNTRSPANPSSRISSARASAIQHSKTSASSIDLSDPDWKLKYEKDFEQRFNIPHITDVLPDAEAIRSTFCLKMRSPTEDFVGGYPSDEEWHGYINNNDRVLLKVIRYSSPTSAGAECIDPDCSWIEQWIHRAGPREKIYFRPEEVKAAIITCGGLCPGLNDVIRHIVITLEIYGVKNIVGIPFGYRGFSDKDLTEMPLSRKVVQNIHLSGGSLLGVSRGGPSVSEIVDSMEERGINMLFVLGGNGTHAGADAIHNECRKRKIKVAVVGVPKTIDNDILHMDKTFGFDTAVEEAQRAINSAYIEAHSAYHGIGVVKLMGRNSGFIAMQASLASGQVDICLIPEVPFNLHGPNGVLKHLKYLIETK…	176	68316	4	4
601	735	gi|297608640|ref|NP_001061896.2|	Os08g0439000 [Oryza sativa Japonica Group] >gi|255678478|dbj|BAF23810.2| Os08g0439000 [Oryza sativa Japonica Group]	MAVSLKSSGSFCSTPPQWLHSTRDRILYGYSHSNAKECTCKKTKRPAPLCVKATSTKVELDFNDPSWKQKFQEDWDKRFNLPRITDIYDLKPRPTTFSLKKNRSPAGDENGTPMDKWNGYVNSDDRALLKVIKYSSPNSAGAECIDPDCSWVEQWVHRAGPRKEIYYEPEEVKAAIVTCGGLCPGLNDVIRQIVFTLETYGVKNIVGIPFGYRGFFEKGLKEMPLSRHLVENINLAGGSFLGVSRGGAKTSEIVDSIQARRIDMLFVLGGNGTHAGANAIHEECRKRKLKVSVVAVPKTIDNDILLMDKTFGFDTAVEEAQRAINSAYIEVPFTLDGEYGVLRHLEHLLKTKGFCVVCVAEAAGQIQLEARATDASGNVILSDIGVHMQQKIKMHFKDI…	176	65738	4	4
601	735	gi|300137917|gb|EFJ04711.1|	hypothetical protein SELMODRAFT_138352 [Selaginella moellendorffii] >gi|302825147|ref|XP_002994206.1| hypothetical protein SELMODRAFT_138352 [Selaginella moellendorffii]	HRAGPRAWIYFHPMTVRAAIVTCGGLCPGLNDVIRQVVYTLETYGVTDILGIQYGFRGFLDKTLPPIILNRKVVQGIHMRGGSFLGVSRGHPNVEELVDKLEEWGINMLYVIGGNGSHAGASAIYEICYKRKLKIVVVGIPKTIDNDILLIDKTFGFDTAVEEAQRAINAAYVEASSALNGVGIVKLMGRQSGFIAMYATLASGQVDLVLIPEVPFEMDGKNGVLAFMKKRLDKNGNCVVVIAEGAAQNYLEGTGGTDASGNPILGDAGKSVNLQVKSHFKELNIPVDVKYIDPTYMIRARACNSSDHIYCSVLGQNAVHGAFAGYTNFSIGLVNTHYVLLPIPEIIKTARAVDPNSNMWHRCLGSTGQPDFAPGPPEIKPSSYPLSQKRASNLMQMNA…	176	54562	4	4
601	735	gi|302823190|ref|XP_002993249.1|	hypothetical protein SELMODRAFT_187341 [Selaginella moellendorffii] >gi|300138919|gb|EFJ05670.1| hypothetical protein SELMODRAFT_187341 [Selaginella moellendorffii]	MRRCLVLVIRAHRAGPRAWIYFHPMTVRAAIVTCGGLCPGLNDVIRQVVYTLETYGVTDILGIQYGFRGFLDKTLPPIILNRKVVQGIHMRGGSFLGVSRGHPNVEELVDKLEEWGINMLYVIGGNGSHAGASAIYEICYKRKLKIVVVGIPKTIDNDILLIDKTFGFDTAVEEAQRAINAAYVEASSALNGVGIVKLMGRQSGFIAMYATLASGQVDLVLIPEVPFEMDGKNGVLAFMKKRLDKNGNCVVVIAEGAAQNYLEGTGGTDASGNPILGDAGKWLYNLVKSHFKELNIPVDVKYIDPTYMIRARACNSSDHIYCSVLGQNAVHGAFAGYTNFSIGLVNTHYVLLPIPEIIKTARAVDPNSNMWHRCLGSTGQPDFAPGPPEIKPSSYPLSQ…	176	56078	4	4
601	735	gi|30681728|ref|NP_850025.1|	PFK5 (PHOSPHOFRUCTOKINASE 5); 6-phosphofructokinase [Arabidopsis thaliana] >gi|17979345|gb|AAL49898.1| putative pyrophosphate-fructose-6-phosphate 1-phosphotransferase [Arabidopsis thaliana] >gi|75161510|sp|Q8VYN6.1|K6PF5_ARATH RecName: Full=6-phosp	MDALSQAISSGISVPYKNNSSSLVPSHGLTSLILRKSRSPVNPSSRSRVSVRASEIQHSKTSASSIDLSDPDWKLKYEKDFEQRFSIPHITDVLPDAEAIRSTFCLKMRSPTEDFVGGYPSDEEWHGYINNNDRVLLKVISYSSPTSAGAECLDHDCSWVEQWIHRAGPREKIYFRPEEVKAAIITCGGLCPGLNDVIRHIVITLEIYGVKNIVGIPFGYRGFSDKDLTEMPLSRKVVQNIHLSGGSLLGVSRGGPSVSEIVDSMEERGINMLFVLGGNGTHAGANAIHNECRKRKIKVAVVGVPKTIDNDILHMDKTFGFDTAVEEAQRAINSAYIEAHSAYHGIGVVKLMGRNSGFIAMQASLASGQVDICLIPEVPFNLHGPNGVLKHLKYLIETK…	176	68274	4	4
601	735	gi|42408655|dbj|BAD09875.1|	putative diphosphate-fructose-6-phosphate 1-phosphotransferase [Oryza sativa Japonica Group] >gi|42408903|dbj|BAD10161.1| putative diphosphate-fructose-6-phosphate 1-phosphotransferase [Oryza sativa Japonica Group]	MAVSLKSSGSFCSTPPQWLHSTRDRILYGYSHSNAKECTCKKTKRPAPLCVKATSTKVELDFNDPSWKQKFQEDWDKRFNLPRITDIYDLKPRPTTFSLKKNRSPAGDENGTPMDKWNGYVNSDDRALLKVIKYSSPNSAGAECIDPDCSWVEQWVHRAGPRKEIYYEPEEVKAAIVTCGGLCPGLNDVIRQIVFTLETYGVKNIVGIPFGYRGFFEKGLKEMPLSRHLVENINLAGGSFLGVSRGGAKTSEIVDSIQARRIDMLFVLGGNGTHAGANAIHEECRKRKLKVSVVAVPKTIDNDILLMDKTFGFDTAVEEAQRAINSAYIEARSAYHGIGLVKLMGRSSGFIAMHASLSSGQVDVCLIPEVPFTLDGEYGVLRHLEHLLKTKGFCVVCVA…	176	71311	4	4
601	735	gi|4544445|gb|AAD22353.1|	putative pyrophosphate--fructose-6-phosphate 1-phosphotransferase [Arabidopsis thaliana]	MRSDHYFSLRSPTEDFVGGYPSDEEWHGYINNNDRVLLKVISYSSPTSAGAECLDHDCSWVEQWIHRAGPREKIYFRPEEVKAAIITCGGLCPGLNDVIRHIVITLEIYGVKNIVGIPFGYRGFSDKDLTEMPLSRKVVQNIHLSGGSLLGVSRGGPSVSEIVDSMEERGINMLFVLGGNGTHAGANAIHNECRKRKIKVAVVGVPKTIDNDILHMDKTFGFDTAVEEAQRAINSAYIEAHSAYHGIGVVKLMGRNSGFIAMQASLASGQVDICLIPEVLLCYYFKFQNMIDELALRDPMHLKVPFNLHGPNGVLKHLKYLIETKGSAVICVAEGAGQNFLEKTNAKDASGNAVLGDFGVYIQQETKKYFKEISTPIDVKYIDPTYMIRAVRANASDGI…	176	59062	4	4
601	735	gi|50253004|dbj|BAD29254.1|	putative phosphofructokinase [Oryza sativa Japonica Group] >gi|50251540|dbj|BAD28914.1| putative phosphofructokinase [Oryza sativa Japonica Group] >gi|222641572|gb|EEE69704.1| hypothetical protein OsJ_29365 [Oryza sativa Japonica Group]	MVLSVRAVSGKSDLDFSDPSWKEKYQEDWNRRFSLPHITDIYDLKPRLTTFSLKKNRTDGGSLSADKWNGYVNKDDRALLKVIKYASPTSAGAECVDPDCSWVEHWIHRAGPRKEIYYEPAEVKAAIVTCGGLCPGLNDVIRQIVFTLEIYGVKNIVGIQFGYRGFFEKGLKEMPLSRKVVENINLSGGSFLGVSRGGAKTSEIVDSIQARRIDMLFVIGGNGSHAGANAIHEECRKRKLKVSVVAVPKTIDNDILFMDKTFGFDTAVEEAQRAINSAYIEARSAYHGIGLVKLMGRSSGFIAMQASLSSGQIDVCLIPEVSFTLDGEHGVMRHLEHLLEKKGFCVVCVAEGAGQDLLQKSNATDASGNVILSDFGVHMQQKIKSHFKDIGVPADVKYI…	176	63431	4	4
613	748	gi|149941230|emb|CAO02547.1|	putative cathepsin B-like cysteine protease [Vigna unguiculata]	SVVAAALTVISHPKSLKLPVNFDARTAWSQCSTIGRILDQGHCGSCWAFGAVESLSDRFCIHFDVNISLSVNDLLACCGFLCGSGCNGGYPLSAWRYLSNHGVVTEECDPYFDQTGCSHPGCEPAYRTPKCVKKCVSGNQLWKKSKHYSVSAYKVKSNPHDIMAEVYKNGPVEVAFTVYEDFAHYKSGVYKHVTGYVPARA	173	26987	3	3
613	748	gi|149941232|emb|CAO02548.1|	putative cathepsin B-like cysteine protease,putative [Vigna unguiculata]	SVVAAEVPVISHPKSLKLPVNFDARTAWSQCSTIGRILDQGHCGSCWAFGAVESLSDRFCIHFDVNISLSVNDLLACCGFLCGSGCNGGYPLSAWRYLSNHGVVTEECDPYFDQTGCSHPGCEPAYRTPKCVKKCVSGNQLWKKSKHYSVSAYKVKSNPHDIMAEVYKNGPVEVAFTVYEDFAHYKSGVYKHVTG	173	26369	3	3
613	748	gi|18378945|ref|NP_563647.1|	cathepsin B-like cysteine protease, putative [Arabidopsis thaliana]	MADSCCIRLHLLASVFLLLFSSFNLQGIAAENLSKQKLTSLILQNEIVKEVNENPNAGWKAAFNDRFANATVAEFKRLLGVIQTPKTAYLGVPIVRHDLSLKLPKEFDARTAWSHCTSIRRILVGYILNNVLLWSTITLWFWFLLGHCGSCWAFGAVESLSDRFCIKYNLNVSLSANDVIACCGLLCGFGCNGGFPMGAWLYFKYHGVVTQECDPYFDNTGCSHPGCEPTYPTPKCERKCVSRNQLWGESKHYGVGAYRINPDPQDIMAEVYKNGPVEVAFTVYEDFAHYKSGVYKYITGTKIGGHAVKLIGWGTSDDGEDYWLLANQWNRSWGDDGYFKIRRGTNECGIEQSVVAGLPSEKNVFKGITTSDDLLVSSV	173	49841	3	3
613	748	gi|18378947|ref|NP_563648.1|	cathepsin B-like cysteine protease, putative [Arabidopsis thaliana] >gi|14532526|gb|AAK63991.1| At1g02300/T6A9_10 [Arabidopsis thaliana] >gi|25090140|gb|AAN72238.1| At1g02300/T6A9_10 [Arabidopsis thaliana] >gi|16226808|gb|AAL16267.1|AF428337_1 At1g0	MADNCIRLLHSASVFFCLGLLISSFNLLQGIAAENLSKQKLTSWILQNEIVKEVNENPNAGWKASFNDRFANATVAEFKRLLGVKPTPKTEFLGVPIVSHDISLKLPKEFDARTAWSQCTSIGRILDQGHCGSCWAFGAVESLSDRFCIKYNMNVSLSVNDLLACCGFLCGQGCNGGYPIAAWRYFKHHGVVTEECDPYFDNTGCSHPGCEPAYPTPKCARKCVSGNQLWRESKHYGVSAYKVRSHPDDIMAEVYKNGPVEVAFTVYEDFAHYKSGVYKHITGTNIGGHAVKLIGWGTSDDGEDYWLLANQWNRSWGDDGYFKIRRGTNECGIEHGVVAGLPSDRNVVKGITTSDDLLVSSF	173	47612	3	3
613	748	gi|194352768|emb|CAQ00112.1|	papain-like cysteine proteinase [Hordeum vulgare subsp. vulgare]	MGGVGVSLALLAAAAAVVISAVAAAPQLVGAAKAEHSLGIIQEDIIQTVNDHPNAGWTAGHNPYFANYTIEQFKHILGVKPTPPGLLAGVPIKTHPKSADLPKEFDARTQWSSCSTIGNILDQGHCGACWAFAAVESLQDRFCIHLNMSVSLSVNDLLACCGFLCGSGCNGGYPISAWRYFRRSGVVTEECDPYFDQTGCQHPGCEPAYPTPKCHRKCKVENQVWKKNKHFSVNAYRVHSNPHDIMAEVYKNGPVEVAFTVYEDFAHYKSGVYKHITGGVMGGHAVKLIGWGTSDAGEDYWLLANQWNRGWGDDGYFKIIRGKNECGIEEDVTAGMPSTKNMDRNNDVAFGTAIL	173	45366	3	3
613	748	gi|195637168|gb|ACG38052.1|	cathepsin B-like cysteine proteinase 3 precursor [Zea mays] >gi|226497010|ref|NP_001150152.1| LOC100283781 [Zea mays]	MGGALLLALLLVSAAAAPQVLGVGNGDNHMRIIQEDIIETVNNHPSAGWTASRNPYFSNYTIAQFKHILGVKPAPQNALSNVPVKTYSRSLELPKEFDARSAWSRCSTIGNILDQGHCGSCWAFGAVECLQDRFCIHLNMSILLSVNDLLACCGFMCGDGCDGGYPIEAWRYFVQNGVVTDECDPYFDPVGCKHPGCEPAYPTPKCEKKCKEQNQVWQEKKHFSIDAYRINSDPHDIMAEVYKNGPVEVAFTVYEDFAHYKSGVYKHITGGIMGGHAVKLIGWGTSDAGEDYWLLANQWNRGWGDDGYFKIIRGKNECGIEEGVVAGMPSTKNMVPNFGGAVGRAIV	173	44652	3	3
613	748	gi|222424744|dbj|BAH20325.1|	AT1G02305 [Arabidopsis thaliana]	FANATVAEFKRLLGVKPTPKTEFLGVPIVSHDISLKLPKEFDARTAWSQCTSIGRILDQGHCGSCWAFGAVESLSDRFCIKYNMNVSLSVNDLLACCGFLCGQGCNGGYPIAAWRYFKHHGVVTEECDPYFDNTGCSHPGCEPAYPTPKCARKCVSGNQLWRESKHYGVSAYKVRSHPDDIMAEVYKNGPVEVAFTVYEDFAHYKSGVYKHITGTNIGGHAVKLIGWGTSDDGEDYWLLANQWNRSWGDDGYFKIRRGTNECGIEHGVVAGLPSDRNVVKGITTSDDLLVSSF	173	38582	3	3
613	748	gi|224064400|ref|XP_002301457.1|	predicted protein [Populus trichocarpa] >gi|222843183|gb|EEE80730.1| predicted protein [Populus trichocarpa]	METSLCFSTLLLLLIGAIFTFQSQVIAVEPVSDLKLNSRILQDSILKKVNGNPKAGWKATMNHHFSNYTVAQFKYLLGVKPTPKEELRGIPVISHPKSLRLPEEFDARTAWPQCSTIGKILDQGHCGSCWAFGAVESLSDRFCIHYGMNISLSVNDLLACCGFLCGSGCNGGYPISAWRYFVHHGVVTEECDPYFDDIGCSHPGCEPGYPTPKCARKCVNKNQLWKKSKHYGVKPYRIDSDPESIMAEIYKNGPVEVAFTVYEDFAHYKSGVYKHITGGMMGGHAVKLIGWGTSEDGEAYWLLANQWNRGWGDDGYFKIRRGTNECGIEGDVVAGLPSTRNLVREVVSVDAREDASA	173	47348	3	3
613	748	gi|2317912|gb|AAC24376.1|	cathepsin B-like cysteine proteinase [Arabidopsis thaliana]	MADSCCIRLHLLASVFLLLFSSFNLQGIAAENLSKQKLTSLILQNEIVKEVNENPNAGWKAAFNDRFANATVAEFKRLLGVIQTPKTAYLGVPIVRHDLSLKLPKEFDARTAWSHCTSIRRILGHCGSCWAFGAVESLSDRFCIKYNLNVSLSANDVIACCGLLCGFGCNGGFPMGAWLYFKYHGVVTQECDPYFDNTGCSHPGCEPTYPTPKCERKCVSRNQLWGESKHYGVGAYRINPDPQDIMAEVYKNGPVEVAFTVYEDFAHYKSGVYKYITGTKIGGHAVKLIGWGTSDDGEDYWLLANQWNRSWGDDGYFKIRRGTNECGIEQSVVAGLPSEKNVFKGITTSDDLLVSSV	173	47148	3	3	1.312		1.622	*	2.165	*	0.61	*	5.125	*	1.198	*	2.215	*
613	748	gi|262217337|gb|ACY38050.1|	cathepsin B [Dactylis glomerata]	MRGASLLLLVVLSAAAAAPQLVGAASGDHSLRIIQKDIIETINKHPNAGWTAGHNAYLANYTIEQFKHILGVKPTPPGLLAGVPTKTYSKSEELPKQFDARSKWSGCSTIGTILDQGHCGSCWAFGAVECLQDRFCIHQNINISLSANDLVACCGFMCGDGCDGGYPIKAWQYFVQSGVVTEECDPYFDQVGCKHPGCEPAYDTPKCEKKCKVQNQVWEEKKHFSINAYRVNSDPHDIMAEVYKNGPVEVAFTVYEDFAHYKSGVYKHVTGGVMGGHAVKLIGWGTSDAGEDYWLLANQWNRGWGDDGYFKIIRGKNECGIEEEVVAGMPSTKNMAGNHGSAFGTAIL	173	46013	3	3
613	748	gi|297335237|gb|EFH65654.1|	hypothetical protein ARALYDRAFT_887368 [Arabidopsis lyrata subsp. lyrata] >gi|297843028|ref|XP_002889395.1| hypothetical protein ARALYDRAFT_887368 [Arabidopsis lyrata subsp. lyrata]	MADKCIKLHLASVFFFLGLLISSFNLQGIAAENLSKQKLTSWILQNEIVKEVNENPNAGWKAAFNDRFANATVAEFKRLLGVKPTPKTEFLGVPIVSHDISLKLPKEFDARTAWSQCTSVGRILDQGHCGSCWAFGAVESLSDRFCIKYNMNISLSVNDLLACCGFLCGQGCNGGYPIAAWRYFKHHGVVTEECDPYFDNTGCSHPGCEPAYPTPKCARKCVSGNQLWRESKHYGVSAYKVRSHPDDIMAEVYKNGPVEVAFTVYEDFAHYKSGVYKHITGTNIGGHAVKLIGWGTSDDGEDYWLLANQWNRSWGDDGYFKIRRGTNECGIEHGVVAGLPSDRNVFKGITTSDDLLVSSF	173	48026	3	3
613	748	gi|297843026|ref|XP_002889394.1|	hypothetical protein ARALYDRAFT_887367 [Arabidopsis lyrata subsp. lyrata] >gi|297335236|gb|EFH65653.1| hypothetical protein ARALYDRAFT_887367 [Arabidopsis lyrata subsp. lyrata]	MADSCCIRLLHLAFVFLLLISSFILQGTAAGNLSKQKLTSLILQNEIVKEVNENPNAGWKASLNDRFANATVAEFKRLLGVKPTPKTAYLGVPIVRHDLSLKLPKEFDARTAWSQCTSIPRILDQGHCGSCWAFGAVESLSDRFCIKYNLNVSLSANDVVACCGLLCGLGCNGGFPMGAWLYFKYHGVVTEECDPYFDNTGCSHPGCEPGYPTPKCVRKCVSENQLWGESKHYGVSAYRINHDPQDIMAEVYKNGPVEVAFTVYEDFAHYKSGVYKHITGTKIGGHAVKLIGWGTSDDGEDYWLLANQWNRSWGDDGYFKIRRGTNECGIEHGVVAGLPSDRNVFKDVTTSDDLLVSSF	173	47211	3	3
613	748	gi|40643250|emb|CAC83720.1|	cathepsin B [Hordeum vulgare subsp. vulgare]	MGSGLLPLALLVVLSAAAAAPQLAGAAGGGHSLGIIQKGIIQTVNNHPNAGWTAGHNPYLANYTIEQFKHMLGVKPTPPGLLAGVRTKTHPRSEQLPKEFDARSKWSGCSTIGKILDQGHCGSCWAFGAVECLQDRFCIHHNMNISLSANDLVACCGFMCGDGCDGGYPISAWQYFVQNGVVTEECDPYFDQVGCKHPGCEPAYPTPVCEKKCKVQNQVWQEKKHFSIDAYQVNSDPHDIMAEVYKNGPVEVAFTVYEDFAHYKSGVYKHITGGVMGGHAVKLIGWGTSDAGEDYWLLANQWNRGWGDDGYFKIIRGKNECGIEEDVTAGMPSMKNIAGSAFAM	173	44441	3	3
613	748	gi|52546914|gb|AAU81590.1|	cysteine proteinase [Petunia x hybrida]	ARGSSDPYSIMTEVYKNGPVEVAFTVYEDFAHYKSGVYKHVTGDELGGHAVKLIGWGTSEDGEDYWLLANQWNRGWGDDGYFKIRRGTNECDIEDEVVAGMPSPKNLNMELDVSDAFLDASM	173	15784	3	3
613	748	gi|62320420|dbj|BAD94873.1|	cathepsin B-like cysteine proteinase like protein [Arabidopsis thaliana]	MGAWLYFKYHGVVTQECDPYFDNTGCSHPGCEPTYPTPKCERKCVSRNQLWGESKHYGVGAYRINPDPQDIMAEVYKNGPVEVAFTVYEDFAHYKSGVYKYITGTKIGGHAVKLIGWGTSDDGEDYWLLANQWNRSWGDDGYFKIRRGTNECGIEQSVVAGLPSEKNVFKGITTSDDLLVSSV	173	24829	3	3
613	748	gi|87240981|gb|ABD32839.1|	Peptidase C1A, papain; Somatotropin hormone; Peptidase C1, propeptide [Medicago truncatula]	MTPTILSLATLFLVFFAPYLRFGEAKTYELSEVKLNSHILQESIARQINENPEAGWEATINPRFSNFTVGQFKRLLGVKQTPRSELSSAPVVTHPKSLKLPKDFDARTAWSQCSTIGRILDQGHCGSCWAFGAVESLSDRFCIHFDMNVSLSVNDILACCGLLCGAGCAGGTPFSAWIYLAHHGVVTEECDPYFDQIGCSHPGCEPTYRTPKCVKKCVNGNQLWETSKHYSVKAYTVNSDPQDIMAEVYKNGPVEVAFTVYEDFAHYKSGVYKHITGFALGGHAVKLVGWGTSHEGEDYWLLANQWNTNWGDDGYFKIKRGTNECGIENAVTAGLPSTKNIVREVTDMDVDADVSF	173	46240	3	3
623	758	gi|215692861|dbj|BAG88281.1|	unnamed protein product [Oryza sativa Japonica Group] >gi|218186299|gb|EEC68726.1| hypothetical protein OsI_37226 [Oryza sativa Indica Group] >gi|241915590|gb|EER88734.1| hypothetical protein SORBIDRAFT_10g025670 [Sorghum bicolor] >gi|302393766|sp|P	MQIFVKTLTGKTITLEVESSDTIDNVKAKIQDKEGIPPDQQRLIFAGKQLEDGRTLADYNIQKESTLHLVLRLRGGTMIKVKTLTGKEIEIDIEPTDTIDRIKERVEEKEGIPPVQQRLIYAGKQLADDKTAKDYNIEGGSVLHLVLALRGGQ	170	21952	6	4
623	758	gi|222635996|gb|EEE66128.1|	hypothetical protein OsJ_22175 [Oryza sativa Japonica Group]	MQIFVKTLTGKTITLEVESSDTIDNVKAKIQDKEGIPPDQQRLIFAGKQLEDGRTLADYNIQKESTLHLVLRLRGGTMIKVKTLTGKEIEIDIEPTDTIDRIKERVEEKEGIPPVQQRLIYAGKQLADDKTAKDYNIEGGSVLHLVLALRGDTADPILIDKYRFNAPRRKKRIANCASERLWRKKASRLAQSCSMLLKDDGEKESIQA	170	30581	6	4
623	758	gi|222856640|gb|EEE94187.1|	predicted protein [Populus trichocarpa] >gi|118486039|gb|ABK94863.1| unknown [Populus trichocarpa] >gi|224083970|ref|XP_002307191.1| predicted protein [Populus trichocarpa] >gi|118481405|gb|ABK92645.1| unknown [Populus trichocarpa]	MQIFVKTLTGKTITLEVESSDTIDNVKSKIQDKEGIPPDQQRLIFAGKQLEDGRTLADYNIQKESTLHLVLRLRGGTMIKVKTLTGKEIEIDIEPTDTIDRVKERVEEKEGIPPVQQRLIYAGKQLGDDKTARDYNIEGGSVLHLVLALRGGFCLYH	170	22256	6	4
623	758	gi|223547286|gb|EEF48781.1|	ubiquitin, putative [Ricinus communis] >gi|255544634|ref|XP_002513378.1| ubiquitin, putative [Ricinus communis]	MQIFVKTLTGKTITLEVESSDTIDNVKAKIQDKEGIPPDQQRLIFAGKQLEDGRTLADYNIQKESTLHLVLRLRGGTMIKVKTLTGKEIEIDIEPTDTIDRIKERVEEKEGIPPVQQRLIYAGKQLGDDKTARDYNIEGGSVLHLVLALRGGCF	170	21840	6	4
623	758	gi|297606280|ref|NP_001058221.2|	Os06g0650100 [Oryza sativa Japonica Group] >gi|255677281|dbj|BAF20135.2| Os06g0650100 [Oryza sativa Japonica Group]	RRIPAADRRRGGGGGGGGRGGVSGMQIFVKTLTGKTITLEVESSDTIDNVKAKIQDKEGIPPDQQRLIFAGKQLEDGRTLADYNIQKESTLHLVLRLRGGTMIKVKTLTGKEIEIDIEPTDTIDRIKERVEEKEGIPPVQQRLIYAGKQLADDKTAKDYNIEGGSVLHLVLALRGGQ	170	24169	6	4
623	758	gi|297736166|emb|CBI24204.3|	unnamed protein product [Vitis vinifera] >gi|225465030|ref|XP_002265864.1| PREDICTED: hypothetical protein [Vitis vinifera]	MQIFVKTLTGKTITLEVESSDTIDNVKAKIQDKEGIPPDQQRLIFAGKQLEDGRTLADYNIQKESTLHLVLRLRGGTMIKVKTLTGKEIEIDIEPTDTIDRIKERVEEKEGIPPVQQRLIYAGKQLGDDKTARDYNIEGGSVLHLVLALRGGGSA	170	21748	6	4
623	758	gi|302393764|sp|P0C073.2|RUB1_DESAN	RecName: Full=Ubiquitin-NEDD8-like protein RUB1; Contains: RecName: Full=Ubiquitin; Contains: RecName: Full=NEDD8-like protein RUB1; AltName: Full=DaRUB1; AltName: Full=Ubiquitin-related protein 1; Flags: Precursor >gi|20562909|gb|AAM22748.1| polyub	MQIFVKTLTGKTITLEVESSDTIDNVKAKIQDKEGIPPDQQRLIFAGKQLEDGRTLADYNIQKESTLHLVLRLRGGTMIKVKTLTGKEIEIDIEPTDTIDRVKERVEEKEGIPPVQQRLIYAGKQLADDKTAKDYNIEGGSVLHLVLALRGGY	170	21972	6	4
623	758	gi|302393765|sp|P0C030.2|RUB1_ORYSJ	RecName: Full=Ubiquitin-NEDD8-like protein RUB1; Contains: RecName: Full=Ubiquitin; Contains: RecName: Full=NEDD8-like protein RUB1; AltName: Full=OsRUB1; AltName: Full=Ubiquitin-related protein 1; Flags: Precursor >gi|115479211|ref|NP_001063199.1|	MQIFVKTLTGKTITLEVESSDTIDNVKAKIQDKEGIPPDQQRLIFAGKQLEDGRTLADYNIQKESTLHLVLRLRGGTMIKVKTLTGKEIEIDIEPTDTIDRIKERVEEKEGIPPVQQRLIYAGKQLADDKTAKDYNIEGGSVLHLVLALRGGY	170	21987	6	4
623	758	gi|312283039|dbj|BAJ34385.1|	unnamed protein product [Thellungiella halophila] >gi|110737109|dbj|BAF00506.1| putative ubiquitin [Arabidopsis thaliana] >gi|302393813|sp|Q9SHE7.3|RUB1_ARATH RecName: Full=Ubiquitin-NEDD8-like protein RUB1; Contains: RecName: Full=Ubiquitin; Contai	MQIFVKTLTGKTITLEVESSDTIDNVKAKIQDKEGIPPDQQRLIFAGKQLEDGRTLADYNIQKESTLHLVLRLRGGTMIKVKTLTGKEIEIDIEPTDTIDRIKERVEEKEGIPPVQQRLIYAGKQLADDKTAKDYNIEGGSVLHLVLALRGGFGLL	170	22254	6	4
625	760	gi|219908431|emb|CAX03490.1|	unnamed protein product [Panax ginseng] >gi|257656801|emb|CBD08487.1| unnamed protein product [Panax ginseng] >gi|73759789|dbj|BAE20169.1| peroxidase [Panax ginseng]	MASTLTSLSSLFFFFSSLSLLLYHLHVSEAQTPPIVKGLSLAFFDSTCPKLESIVRKQLEKEFKADIGQAAGLLRLHFHDCFVQGCDASVLLDGSASGPSEKNAPPNLSLRAKAFTIIEDLRRQVHKQCGKIVSCADITALAARDAVVLSGGPNYQVPYGRRDGLQFATRQATLANLPPPFANTTTILNSLVTKNFDPTDVVALSGAHTIGLSHCSSFIRRLFPTQDSTMAQSFAKDLRITCPTNTTDNTTNLDFRTPNVFDNKYYVDLVNRQGLFTSDQDLFTDNRTRGIVTSFANNQTLFFEKFVNAMLKMGQLSVLTGTQGEIRGNCSVKNSNNLFLSTVVEEGMENLLGF	170	44115	4	4	5.059	*	0.399	*	0.357	*	3.963	*	0.648		0.832		1.488	*
626	761	gi|222842607|gb|EEE80154.1|	predicted protein [Populus trichocarpa] >gi|224062736|ref|XP_002300881.1| predicted protein [Populus trichocarpa]	MEVDKVETQQQQQKQKQVHLFYCVESEELARNVAAHSELITLQSINWRNFDDGFPNLFINNAENLRGQHVAFLASFSSPGVIFEQLSVIYALPRLFVASFSLVLPFFPTGSFERMEEEGDVATAFTMARILSNIPISRGGPTSLVIYDIHALQERFYFGDHVLPLFVTGIPLLKQRLHQLPESDKIVVAFPDDGAWKRFHKLLDHFPMVVCAKVREGDKRIVRIKEGNPAGCHVVIVDDLVQSGGTLIECQKVLAAHGAAKVSAYVTHGVFPKRSWERFTHKDNGMENAFAYFWITDSCPHTVKAITNKPPFEVLSLAGSIADALQI	170	42127	3	3
626	761	gi|223528241|gb|EEF30295.1|	Ribose-phosphate pyrophosphokinase, putative [Ricinus communis] >gi|255582599|ref|XP_002532081.1| Ribose-phosphate pyrophosphokinase, putative [Ricinus communis]	MAETEMQRQQQQQKKQVHLFYCDETEELAIKVAAHSDLITLQSINWRNFDDGFPNLFINNAQEMRGQHVAFLAAFSSPAVIFEQLSVIYALPRLFVASFTLVLPFFPTGSFERMEEEGDVATAFTMARILSNIPISRGGPTSLVIYDIHALQERFYFGDNVLPLFETGIPLLKQRLHQLSDSDKIVVAFPDDGAWKRFHKLLDHFPMVVCNKVREGDKRIVRIKEGNPAGCHVVIVDDLVQSGGTLIECQKVLAAHGAAKVSAYVTHGVFPKRSWERFTHKSNGSESAFAYFWITDSCPLTVKAIANKAPFEVLSLAGSIADALQT	170	41910	3	3
626	761	gi|224085342|ref|XP_002307546.1|	predicted protein [Populus trichocarpa] >gi|222856995|gb|EEE94542.1| predicted protein [Populus trichocarpa]	MEVDKVETQNQQQKHKQVHLFYCLESEELARKVAGHSDLITLQSINWRNFDDGFPNLFINNAEDLRGQHVAFLACFSSPGVIFEQLSVIYALPRLFAASFTLVLPFFPTGSFERMEEEGDVATAFTMARILSNIPISRGGPTSLVIYDIHALQERFYFGDQVLPLFVTGIPLLKQRLHQLPESDKIAVAFPDDGAWKRFHKLLDHFPMVVCVKVREGDERIVRIKEGNPAGYHVVIVDDLVQSGGTLVECQKVLAAHGAAKVSAYVTHGVFPKRSWERFTHKNEAGMEDAFAYFWITDSCPHTVKAIANKRPFEVLSLAGSIADALQI	170	42278	3	3
626	761	gi|225446855|ref|XP_002279775.1|	PREDICTED: hypothetical protein [Vitis vinifera]	MEEGVLRVMEKPNEKQILLFYCMESEDLARKVAEQSPLIQLQSINWRSFDDGFPNLFINNAQYIRGQHVAFLASFSSPAVIFEQLSVIFALPRLFVASFTLVLPFFPTGSFERMEEEGDVATAFTMARILSNIPISRGGPTSLVIYDIHALQERFYFSDHVLPLFETGIPLLKQRLHQLPDTDNVVVAFPDDGAWKRFHKQLDHFPMVVCAKVREGDKRIVRLKEGNPAGCHVVIVDDLVQSGGTLIECQVIFPLWLFVVRVVGFSSLFSCLPIRSNCILRSEKAFTYFWTTDSCPLTVKAIGNRAPFEILSLAGSIADALQI	170	40432	3	3
626	761	gi|296086310|emb|CBI31751.3|	unnamed protein product [Vitis vinifera]	MEKPNEKQILLFYCMESEDLARKVAEQSPLIQLQSINWRSFDDGFPNLFINNAQYIRGQHVAFLASFSSPAVIFEQLSVIFALPRLFVASFTLVLPFFPTGSFERMEEEGDVATAFTMARILSNIPISRGGPTSLVIYDIHALQERFYFSDHVLPLFETGIPLLKQRLHQLPDTDNVVVAFPDDGAWKRFHKQLDHFPMVVCAKVREGDKRIVRLKEGNPAGCHVVIVDDLVQSGGTLIECQKVLAAHGASKVSAYVTHSVFPKRSWERFIHKNDGSEKAFTYFWTTDSCPLTVKAIGNRAPFEILSLAGSIADALQI	170	40864	3	3
627	762	gi|227478251|emb|CAY38949.1|	unnamed protein product [Raphanus sativus] >gi|298556712|emb|CBN69803.1| unnamed protein product [Raphanus sativus] >gi|1526562|dbj|BAA04994.1| glutamine synthetase [Raphanus sativus] >gi|227477505|emb|CAY33678.1| unnamed protein product [Raphanus s	MSLLSDLVNLNLSDSTEKIIAEYIWIGGSGMDIRSKARTLPGPVSDPSKLPKWNYDGSSTGQAAGDDSEVIIYPQAIFRDPFRRGNNILVMCDAYTPAGNPIPTNKRHNAAKIFSTSKVASEEPWYGIEQEYTLMQKGVNWPIGWPVGGFPGPQGPYYCGVGADKAIGRDIVDAHYKACLYAGISISGVNGEVMPGQWEFQVGPVEGISAGDQVWVARFLLERITEISGVNVSFDPKPVPGDWNGAGAHCNYSTKSMRNDGGLAVIKKAIEKLQVKHKEHIAAYGEGNERRLTGKHETADINTFSWGVANRGASVRVGRDTEKEGKGYFEDRRPASNMDPYVVTSMIAETTILG	170	45111	6	2
627	762	gi|227478727|emb|CAY33784.1|	unnamed protein product [Brassica napus] >gi|227479471|emb|CAY39056.1| unnamed protein product [Brassica napus]	MSLLSDLVNLNLSDSTEKIIAEYIWIGGSGMDIRSKARTLPGPVSDPSKLPKWNYDGSSTGQAAGDDSEVILYPQAIFRDPFRKGNNILVMCDAYTPAGNPIPTNKRHNAAKIFSNPKVASEEPWYGIEQEYTLMQKGVNWPIGWPIGGFPGPQGPYYCGVGADKAIGRDIVDAHYKACIYAGIGISGVNGEVMPGQWEFQVGPVEGISAGDQVWVARYLLERITEISGVNVSFDPKPVPGDWNGAGAHCNYSTKSMRNDGGLAVIKKAIEKLQVKHKEHIAAYGEGNERRLTGKHETADINTFSWGVANRGASVRVGRDTEKEGKGYFEDRRPASNMDPYVVTSMIAETTILG	170	45410	6	2
627	762	gi|228456|prf||1804333D	Gln synthetase	MAQILAASPTCQMRVPKHSSVIASSSKLWSSVVLKQKKQSNNKVRGFRVLALQSDNSTLLSDEVLLNLTDATGKDRIIAEYIWIGGSGMDIRSKARTLPGPVTDPSKLPKWNYDGSSTGQAAGEDSEVILYPQAIFKDPFRKGNNILVMCDAYTPAGDPIPTNKRHNAAKIFSHPDVAKEEPWYGIEQEYTLMQKDVNWPIGWPVGGYPGPQGPYYCGVGADKAIGRDIVDAHYKACLYAGIGISGINGEVMPGQWEFQVGPVEGISSGDQVWVARYLLERITEISGVIVSFDPKPVPGDWNGAGAHCNYSTKTMRNDGGLEVIKKAIGKLQLKHKEHIAAYGEGNERRLTGKHETADINTFSWGVANRGASVRVGRDTEKEGKGYFEDRRPASNMDPY…	170	56249	6	2
627	762	gi|28393681|gb|AAO42253.1|	putative glutamine synthetase [Arabidopsis thaliana] >gi|298552673|emb|CBN69856.1| unnamed protein product [Arabidopsis thaliana]	MSLLSDLVNLNLTDATGKIIAEYIWIGGSGMDIRSKARTLPGPVTDPSKLPKWNYDGSSTGQAAGEDSEVILYPQAIFKDPFRKDNNILVMCDAYTPAGDPIPTNKRHNAAKIFSHPDVAKEEPWYGIEQEYTLMQKDVNWPIGWPVGGYPGPQGPYYCGVGADKAIGRDIVDAHYKACLYAGIGISGINGEVMPGQWEFQVGPVEGISSGDQVWVARYLLERITEISGVIVSFDPKPVPGDWNGAGAHCNYSTKTMRNDGGLEVIKKAIGKLQLKHKEHIAAYGEGNERRLTGKHETADINTFSWGVANRGASVRVGRDTEKEGKGYFEDRRPASNMDPYVVTSMIAETTILG	170	45853	6	2
627	762	gi|297328929|gb|EFH59348.1|	ATGSKB6 [Arabidopsis lyrata subsp. lyrata] >gi|297830414|ref|XP_002883089.1| ATGSKB6 [Arabidopsis lyrata subsp. lyrata]	MSLLSDLVNLNLSGATDKIIAEYIWIGGSGMDIRSKARTLPGPVTDPSKLPKWNYDGSSTGQAAGEDSEVILYPQAIFKDPFRKGNNILVMCDAYTPAGDPIPTNKRHNAAKIFSHPNVASEEPWYGIEQEYTLMQKDVNWPIGWPVGGFPGPQGPYYCGVGADKAIGRDIVDAHYKACIYAGIGISGVNGEVMPGQWEFQVGPVEGISAGDQVWVARYLLERITEISGVNVSFDPKPVPGDWNGAGAHCNYSTKTMRNDGGLEVIKKAIGKLQLKHKEHIAAYGEGNERRLTGKHETADINTFSWGVANRGASVRIGRDTEKEGKGYFEDRRPASNMDPYVVTSMIAETTILG	170	45404	6	2
627	762	gi|297337278|gb|EFH67695.1|	hypothetical protein ARALYDRAFT_891668 [Arabidopsis lyrata subsp. lyrata] >gi|297847110|ref|XP_002891436.1| hypothetical protein ARALYDRAFT_891668 [Arabidopsis lyrata subsp. lyrata]	MTSPLSDLLNLDLSDTKKIIAEYIWIGGSGMDIRSKARTLPGPVSDPTKLPKWNYDGSSTDQAAGDDSEVILYPQAIFKDPFRKGNNILVMCDAYTPAGDPIPTNNRNKAVKIFDHPNVKAEEPWFGIEQEYTLLKKDVKWPLGWPLGGFPGPQGPYYCAVGADKAFGRDIVDAHYKACLYSGLSIGGANGEVMPGQWEFQISPTVGIGAGDQLWVARYILERITEICGVIVSFDPKPIQGDWNGAAAHTNFSTKSMRKDGGLDLIKEAIKKLEVKHKQHIAAYGEGNERRLTGKHETADINTFSWGVANRGASVRVGRDTEKEGKGYFEDRRPSSNMDPYLVTSMIAETTIL	170	47246	6	2
627	762	gi|4138351|emb|CAA06383.1|	glutamine synthetase [Pinus sylvestris] >gi|227477625|emb|CAY33738.1| unnamed protein product [Pinus sylvestris] >gi|298532560|emb|CBN69898.1| unnamed protein product [Pinus sylvestris] >gi|227478371|emb|CAY39009.1| unnamed protein product [Pinus sy	MSLLTDLINLDLSDITEKIIAEYIWIGGSGMDIRSKARTLSHPVTDPKDLPKLNYDGSSTGQAPGKDSEVILYPQAIFRDPFRRGNNILVICDTYTPAGEPIPTNKRANAQKYLAIQMLFAEEPWYGIEQEYTLLQKDVNWPLGWPVGGYPGPQGPYYCGTGADKAYGRDIVDAHYKACLYAGINISGINGEVMPGQWEFQVGPTVGISSGDQVWAARYLLERITEVAGVVLSFDPKPIQGDWNGAGAHTNYSTKSMREEGGIKVIKKAIEKLGLRHKEHIAAYGEGNERRLTGRHETADINTFSWGVANRGASIRVGRDTEREGKGYFEDRRPASNMDPYIVTSMIAETNHPLK	170	45514	6	2
627	762	gi|56744238|gb|AAW28559.1|	At3g17820 [Arabidopsis thaliana] >gi|15229530|ref|NP_188409.1| ATGSKB6; copper ion binding / glutamate-ammonia ligase [Arabidopsis thaliana] >gi|56381927|gb|AAV85682.1| At3g17820 [Arabidopsis thaliana] >gi|21593884|gb|AAM65851.1| glutamine synthetas	MSLLSDLVNLNLTDATGKIIAEYIWIGGSGMDIRSKARTLPGPVTDPSKLPKWNYDGSSTGQAAGEDSEVILYPQAIFKDPFRKGNNILVMCDAYTPAGDPIPTNKRHNAAKIFSHPDVAKEEPWYGIEQEYTLMQKDVNWPIGWPVGGYPGPQGPYYCGVGADKAIGRDIVDAHYKACLYAGIGISGINGEVMPGQWEFQVGPVEGISSGDQVWVARYLLERITEISGVIVSFDPKPVPGDWNGAGAHCNYSTKTMRNDGGLEVIKKAIGKLQLKHKEHIAAYGEGNERRLTGKHETADINTFSWGVANRGASVRVGRDTEKEGKGYFEDRRPASNMDPYVVTSMIAETTILG	170	45795	6	2
627	762	gi|99698|pir||S18603	glutamate-ammonia ligase (EC 6.3.1.2), cytosolic (clone lambdaAtgskb6) - Arabidopsis thaliana	STLLSDEVLLNLTDATGKDRIIAEYIWIGGSGMDIRSKARTLPGPVTDPSKLPKWNYDGSSTGQAAGEDSEVILYPQAIFKDPFRKGNNILVMCDAYTPAGDPIPTNKRHNAAKIFSHPDVAKEEPWYGIEQEYTLMQKDVNWPIGWPVGGYPGPQGPYYCGVGADKAIGRDIVDAHYKACLYAGIGISGINGEVMPGQWEFQVGPVEGISSGDQVWVARYLLERITEISGVIVSFDPKPVPGDWNGAGAHCNYSTKTMRNDGGLEVIKKAIGKLQLKHKEHIAAYGEGNERRLTGKHETADINTFSWGVANRGASVRVGRDTEKEGKGYFEDRRPASNMDPYVVTSMIAETTILGEPTLEAEALAAQKLSLNV	170	48233	6	2	0.519	*	0.73	*	0.733	*	0.958		2.15	*	0.243	*	0.1	*
629	765	gi|219982817|emb|CAW93873.1|	unnamed protein product [Pinus radiata] >gi|219898353|emb|CAX07628.1| unnamed protein product [Pinus radiata] >gi|257639548|emb|CBD12800.1| unnamed protein product [Pinus radiata] >gi|257680127|emb|CBC95796.1| unnamed protein product [Pinus radiata]	MAAIKSTSRSASVAFAPDAPLLAAGTMAGAIDLSFSSLANLEIFKLDFQSDDPELPVVGECPSNERLNRLSWGSAGGSFGIIAGGLVDGTINIWNPATLINSEDNGDALIARLEQHTGPVRGLEFNTISTNLLASGAEDGELCIWDLANPTAPTHFPPLKGVGSGAQGEISFLAWNRKVQHILASTSYSGTTVVWDLRRQKPIISFPDATRRRCSVLQWNPDASTQLIVASDDDNSPTLRAWDLRNTISPYKEFVGHSRGVIAMSWCPSDSLFLLTCAKDNRTLCWDTGSGEIVCELPAGANWNFDVQWSPKIPGILSTSSFDGKIGIHNIEACSRNVSGEVEFGGAIVRGGPSALLKAPKWLERPAGVSFGFGGKLASFRPSTVAQAADHRHSEVFIH…	169	141435	4	4
631	767	gi|283135908|gb|ADB11345.1|	DHAR class glutathione transferase DHAR3 [Populus trichocarpa]	MALEICVKAAVGAPNILGDCPFCQRVLLSLEEKKIPYKSHLIDLGDKPQWFLEISPEGKVPVVKIDDKWVADSDVIVGILEEKNPEPPLATPPEFASVGSKIFPSFVKFLKSKDPNDGTEQALLEELKALDEHLKVHGPFIAGEKITAVDLSLAPKLYHLEVALGHFRNWTIPDNLTHVLNYIKLLFSRESFKKTRAAEEHVIAGWEPKVNA	168	30457	4	4	4.8	*	1.613	*	0.779		2.834	*	0.988		1.712	*	1.245	*
633	769	gi|118481385|gb|ABK92635.1|	unknown [Populus trichocarpa] >gi|222849728|gb|EEE87275.1| predicted protein [Populus trichocarpa]	MGISRDSMHKRRATGGKKKAWRKKRKYELGRQPASTKLSSNKTVRRIRVRGGNVKWRALRLDTGNYSWGSEAVTRKTRILDVVYNASNNELVRTQTLVKSAIVQVDAAPFKQWYLQHYGVDIGRKKKTTAAAKKEGEEGEAAATEEVKQSNHVQRKLEKRQQIRKLDPHIEEQFGSGRLLASISSRPGQCGRADGYILEGKELEFYMKKIQRKKGKGAA	168	33731	6	2
633	769	gi|118481469|gb|ABK92677.1|	unknown [Populus trichocarpa] >gi|222847184|gb|EEE84731.1| predicted protein [Populus trichocarpa] >gi|224059598|ref|XP_002299926.1| predicted protein [Populus trichocarpa]	MGISRDSMHKRRATGGKKKAWRKKRKYELGRQPASTKLSSNKTVRRIRVRGGNVKWRALRLDTGNYSWGSEAVTRKTRILDVVYNASNNELVRTQTLVKSAIVQVDAAPFKQWYLQHYGVDIGRKKKTAPAAKKEGEDGEAAVEEEKKSKHVQRKLEKRQQTRKLDPHIEEQFGSGRLLASISSRPGQCGRADGYILEGKELEFYMKKIQRKKGKGAGAA	168	34409	6	2
633	769	gi|147772691|emb|CAN64937.1|	hypothetical protein [Vitis vinifera]	MGISRDSMHKRRATGGKKKAWRKKRKYELGRQPANTKLSSNKTVRRVRVRGGNVKWRALRLDTGNYSWGSEAVTRKTRILDVVYNASNNELVRTQTLVKSAIVQVDAAPFKQWYLQHYGVDIGRKKKTTAKKETTEEGEGGATEETKKSNHVLRKLEKRQQDHRLDPHIEEQFGSGRLLASISSRPGQCGRADGYILEGKELEFYMKKIQRKKGKGSAGAA	168	33932	6	2
633	769	gi|223525453|gb|EEF28038.1|	40S ribosomal protein S8, putative [Ricinus communis] >gi|255587656|ref|XP_002534344.1| 40S ribosomal protein S8, putative [Ricinus communis]	MGISRDSMHKRRATGGKKKAWRKKRKYELGRQAANTKLSSNKTVRRIRVRGGNVKWRALRLDTGNYSWGSEAVTRKTRILDVVYNASNNELVRTQTLVKSAIVQVDAAPFKQWYLQHYGVDIGRKKKTVAKKETEEGEGEGAAAEESKKSNHVIRKLEKRQKDRKLDAHIEEQFWGGRLLACISSRPGQCGRADGYILEGKELEFYMKKLQRKKGKGAGAA	168	34632	6	2
633	769	gi|224104103|ref|XP_002313320.1|	predicted protein [Populus trichocarpa]	MGISRDSMHKRRATGGKKKAWRKKRKYELGRQPASTKLSSNKTVRRIRVRGGNVKWRALRLDTGNYSWGSEAVTRKTRILDVVYNASNNELVRTQTLVKSAIVQVDAAPFKQWYLQHYGVDIGRKKKTTAAAKKEGEEGEAAATEEVKQSNHVQRKLEKRQQIRKLDPHIEEQFGSGRLLASISSRPGQCGRADGYILEGKELEFYMKKIQRKKGKGAAMGISRDSMHKRRATGGKKKAWRKKRKYELGRQPASTKLSSNKTVRRIRVRGGNVKWRALRLDTGNYSWGSEAVTRKTRILDVVYNASNNELVRTQTLVKSAIVQVDAAPFKQWYLQHYGVDIGRKKKTTAAAKKEGEEGEAAATEEVKQSNHVQRKLEKRQQIRKLDPHIEEQFGSGRLL…	168	67140	6	2
633	769	gi|224127352|ref|XP_002329256.1|	predicted protein [Populus trichocarpa] >gi|222870710|gb|EEF07841.1| predicted protein [Populus trichocarpa]	MGISRDSMHKRRATGGKKKAWRKKRKYELGRQPASTKLSSNKTVRRIRVRGGNVKWRALRLDTGNYSWGSEAVTRKTRILDVVYNASNNELVRTQTLVKSAIVQVDAAPFKQWYLQHYGVDIGRKKKAVVKKETPEQEGEATTEETKKSNHVIRKLEKRQQVRKLDPHIEEQFGSGRLLASISSRPGQCGRADGYILEGKELEFYMKKIQRKKGKGAGAA	168	34219	6	2
633	769	gi|225463337|ref|XP_002269042.1|	PREDICTED: hypothetical protein [Vitis vinifera]	MGISRDSMHKRRATGGKKKAWRKKRKYELGRQPANTKLSSNKTVRRVRVRGGNVKWRALRLDTGNYSWGSEAVTRKTRILDVVYNASNNELVRTQTLVKSAIVQVDAAPFKQWYLQHYGVDIGRKKKTTAKKETTEQEGEGGATEETKKSNHVLRKLEKRQQDHRLDPHIEEQFGSGRLLASISSRPGQCGRADGYILEGKELEFYMKKIQRKKGKGSAGAA	168	34060	6	2
633	769	gi|225469255|ref|XP_002265540.1|	PREDICTED: hypothetical protein [Vitis vinifera]	MGISRDSMHKRRATGGKKKAWRKKRKYELGRQPANTKLSSNKTVRRVRVRGGNVKWRALRLDTGNYSWGSEAVTRKTRILDVVYNASNNELVRTQTLVKSAIVQVDAAPFKQWYLQHYGVDIGRKKKAAAIKGTTECAVNNGVPHLGIPFSMK	168	23107	6	2
633	769	gi|255576278|ref|XP_002529032.1|	40S ribosomal protein S8, putative [Ricinus communis] >gi|223531512|gb|EEF33343.1| 40S ribosomal protein S8, putative [Ricinus communis]	MGISRDSMHKRRATGGKKKAWRKKRKYELGRQPASTKLSSNKTVRRIRVRGGNVKWRALRLDTGNYSWGSEAVTRKTRILDVVYNASNNELVRTQTLVKSAIIQVDAAPFKQWYLQHYGVDIGRKKKTAAAKKEGEEGEAATEEVKKSNHVLRKLEKRQQIRKLDPHIEEQFGGGRLLACISSRPGQCGRADGYILEGKELEFYMKKLQRKKGKGAGAA	168	34034	6	2
633	769	gi|296089558|emb|CBI39377.3|	unnamed protein product [Vitis vinifera]	MHKRRATGGKKKAWRKKRKYELGRQPANTKLSSNKTVRRVRVRGGNVKWRALRLDTGNYSWGSEAVTRKTRILDVVYNASNNELVRTQTLVKSAIVQVDAAPFKQWYLQHYGVDIGRKKKTTAKKETTEEGEGGATEETKKSNHVLRKLEKRQQDHRLDPHIEEQFGSGRLLASISSRPGQCGRADGYILEGKELEFYMKKIQRKKGKGSAGAA	168	33186	6	2
659	796	gi|296528874|emb|CBM37989.1|	unnamed protein product [Glycine max]	MAWQAIISAPEVAKENKHQIVETEHLMKALLEQKNGLARRIFSKVGVDNTRLLETTDKHIQRQPKVVGESTGSMLGRDLEALIQRARDFKKEYGDSFVSVEHFVLGFAQDKRFGKILFRDFQISQQALKSAIESIRGRQLVIDQDPEGKYEALEKYGKDLTAMAKAGKLDPVIGRDDEIRRCIQILSRRTKNNPVLIGEPGVGKTAISEGLAQRIVQGDVPQALMNRRLISLDMGALIAGAKYRGEFEDRLKAVLKEVTESDGQTILFIDEIHTVVGAGASNGAMDAGNLLKPMLGRGELRCIGATTLDEYRKYIEKDPALERRFQQVYVDQPSVEDTISILRGLRERYELHHGVRISDSALVDAAILSDRYISGRFLPDKAIDLVDEAAAKLKMEITS…	161	117946	6	2	1.475		0.585		0.4		0.809		0.345		0.369		0.338	*
659	796	gi|296528876|emb|CBM37990.1|	unnamed protein product [Glycine max]	MASATSFLGLGLRPSVPICANRNNGIRFSQFQVSFGFRENSTSLKTLNSTPLKKREAFSNGSSRTRRNPLFSVRCTVSSSGKITQQEFTEMAWQAIISAPEVAKENKHQIVETEHLMKALLEQKNGLARRIFSKVGVDNTRLLEATDKHIQRQPKVVGESAGSMLGRDLEALIQRARDFKKEYGDSFVSVEHFVLGFAQDKRFGKILFRDFQISQQALKSAIESIRGRQSVIDQDPEGKYEALEKYGKDLTAMAKAGKLDPVIGRDDEIRRCIQILSRRTKNNPVLIGEPGVGKTAISEGLAQRIVQGDVPQALMNRRLISLDMGALIAGAKYRGEFEDRLKAVLKEVTESDGQTILFIDEIHTVVGAGASNGAMDAGNLLKPMLGRGELRCIGATTLD…	161	129180	6	2
666	803	gi|115471065|ref|NP_001059131.1|	Os07g0201100 [Oryza sativa Japonica Group] >gi|75133394|sp|Q6Z382.1|COPG2_ORYSJ RecName: Full=Coatomer subunit gamma-2; AltName: Full=Gamma-2-coat protein; Short=Gamma-2-COP >gi|34394800|dbj|BAC84213.1| putative coatomer protein gamma 2-subunit [Ory	MAQPLVVKKDDDLDEEEYYSPFLGIEKGAVLQEARVFHDPQLDARRCCQVITKLLYLLNQGDTFTKVEATEVFFATTKLFQSKDAGLRRMVYLMIKELSPSADEVIIVTSSLMKDMNSKTDMYRANAIRVLCRIIDSTLLTQIERYLKQAIVDKNPVVASAALVSGIYLLQTSPEVVKRWSNEVQEAVQSRAALVQFHALALLHQIRQNDRLAVSKLVTSLTRGSVRSPLAQCLLIRYTSQVIRESSMNSQGGDRPFFDFLESCLRNKAEMVILEAARAITELNGVTSRELTPAITVLQLFLSSSKPVLRFAAVRTLNKVASTHPLAVTNCNIDMESLISDQNRSIATLAITTLLKTGNESSVDRLMKQMTNFMSDIADEFKIVVVEAIRSLCLKFPLK…	159	114748	4	4
666	803	gi|212723038|ref|NP_001132662.1|	hypothetical protein LOC100194138 [Zea mays] >gi|195613770|gb|ACG28715.1| coatomer subunit gamma [Zea mays] >gi|224029939|gb|ACN34045.1| unknown [Zea mays]	MAQPLVVKKDDDLDEEEYYSPFLGIEKGAVLQEARVFHDPQLDARRCCQVITKLLYLLNQGDTFTKVEATEVFFATTKLFQSKDVGLRRMVYLMIKELSPSADEVIIVTSSLMKDMNSKTDMYRANAIRVLCRIIDSTLLTQIERYLKQAIVDKNPVVASAALVSGIYLLQTSPEVVKRWSNEVQEAVQSRAALVQFHALALLHQIRQNDRLAVSKLVTSLTRGSVRSPLAQCLLIRYTSQVIRESGVNQGGDRPFFDFLESCLRNKAEMVILEAARAITELNGVTSRELTPAITVLQLFLSSSKPVLRFAAVRTLNKVASTHPLAVTNCNIDMESLISDQNRSIATLAITTLLKTGNESSVDRLMKQMTNFMSDIADEFKIVVVEAIRSLCLKFPLKY…	159	115119	4	4
666	803	gi|218199265|gb|EEC81692.1|	hypothetical protein OsI_25286 [Oryza sativa Indica Group]	MAQPLVVKKDDDLDEEEYYSPFLGIEKGAVLQEARVFHDPQLDARRCCQVITKLLYLLNQGDTFTKVEATEVFFATTKLFQSKDAGLRRMVYLMIKELSPSADEVIIVTSSLMKDMNSKTDMYRANAIRVLCRIIDSTLLTQIERYLKQAIVDKNPVVASAALVSGIYLLQTSPEVVKRWSNEVQEAVQSRAALVQFHALALLHQIRQNDRLAVSKLVTSLTRGSVRSPLAQCLLIRYTSQVIRESSMNSQGGDRPFFDFLESCLRNKAEMVILEAARAITELNGVTSRELTPAITVLQLFLSSSKPVLRFAAVRTLNKVASTHPLAVTNCNIDMESLISDQNRSIATLAITTLLKTGNESSVDRLMKQMTNFMSDIADEFKIVVVEAIRSLCLKFPLK…	159	114758	4	4
666	803	gi|219888335|gb|ACL54542.1|	unknown [Zea mays]	MAQPLVVKKDDDLDEEEYYSPFLGIEKGAVLQEARVFHDPQLDARRCCQVITKLLYLLNQGDTFTKVEATEVFFATTKLFQSKDAGLRRMVYLMIKELSPSADEVIIVTSSLMKDMNSKTDMYRANAIRVLCRIIDSTLLTQIERYLKQAIVDKNPVVASAALVSGIYLLQTSPEVVKRWSNEVQEAVQSRAALVQFHALALLHQIRQNDRLAVSKLVTSLTRGSVRSPLAQCLLIRYTSQVIRESGVYQGGDRPFFDFLESCLRNKAEMVILEAARAITELNGVTSRELTPAITVLQLFLSSSKPVLRFAAVRTLNKVASTHPLAVTNCNIDMESLISDQNRSVATLAITTLLKTGNESSVDRLMKQMTNFMSDIADEFKIVVVEAIRSLCLKFPLKY…	159	114228	4	4
666	803	gi|241922891|gb|EER96035.1|	hypothetical protein SORBIDRAFT_02g005920 [Sorghum bicolor] >gi|242043286|ref|XP_002459514.1| hypothetical protein SORBIDRAFT_02g005920 [Sorghum bicolor]	MAQPLVVKKDDDLDEEEYYSPFLGIEKGAVLQEARVFHDPQLDARRCCQVITKLLYLLNQGDTFTKVEATEVFFATTKLFQSKDAGLRRMVYLMIKELSPSADEVIIVTSSLMKDMNSKTDMYRANAIRVLCRIIDSTLLTQIERYLKQAIVDKNPVVASAALVSGIYLLQTSPEVVKRWSNEVQEAVQSRAALVQFHALALLHQIRQNDRLAVSKLVTSLTRGSVRSPLAQCLLIRYTSQVIRESGVNQGGDRPFFDFLESCLRNKAEMVILEAARAITELNGVTSRELTPAITVLQLFLSSSKPVLRFAAVRTLNKVASTHPLAVTNCNIDMESLISDQNRSIATLAITTLLKTGNESSVDRLMKQMTNFMSDIADEFKIVVVEAIRSLCLKFPLKY…	159	114295	4	4
666	803	gi|255536821|ref|XP_002509477.1|	coatomer gamma subunit, putative [Ricinus communis] >gi|223549376|gb|EEF50864.1| coatomer gamma subunit, putative [Ricinus communis]	MAQPLIKKDDDRDDEADYSPFLGIEKGAVLQEARVFNDPQLDSRKCSQVITKILYLLNQGDSLSKIEATEVFFSVTKLFQSRDLALRRMVYLIIKELSPSADEVIIVTSSLMKDMNSKTDMYRANAIRVLCRITDGTLLTQIERYLKQAIVDKNPVVASAALVSGIHLLQTNPEIVKRWSNEVQEAVQSRAALVQFHALALLHQIRQNDRLAVSKLVTSLTRGTVRSPLAQCLLIRYTSQVIRESATNTQTGDRPFYDFLEGCLRHKAEMVIFEAARAITELNGVTSRELTPAITVLQLFLSSSKPVLRFAAVRTLNKVAMTHPMAVTNCNIDMESLISDQNRSIATLAITTLLKTGNESSVDRLMKQITNFMSDIADEFKIVVVEAIRSLCLKFPLKY…	159	114084	4	4
666	803	gi|297741448|emb|CBI32579.3|	unnamed protein product [Vitis vinifera] >gi|225428505|ref|XP_002284401.1| PREDICTED: hypothetical protein [Vitis vinifera]	MAQPLVKKDDDRDDEADYSPFLGIEKGAVLQEARVFNDPQLEPRRCSQVITKLLYLLNQGETFTKIEATEVFFAVTKLFQSRDTGLRRMVYLMIKELSPSADEVIIVTSSLMKDMNSKTDMYRANAIRVLCRITDGTLLTQIERYLKQAIVDKNPVVASAALVSGIHLLQTNPEIVRRWSNEVQEAVQSRAALVQFHALALLHQIRQNDRLAVSKLVTSLTRGNVRSPLAQCLLIRYTSQVIRESGTNTQTGDRPFYDFLEGCLRHKAEMVIFEAARAITELSGVTSRELTPAITVLQLFLSSSKPVLRFAAVRTLNKVAMTHPMAVTNCNIDMESLISDQNRSIATLAITTLLKTGNESSVDRLMKQITNFMSDIADEFKIVVVEAIRSLCLKFPLKY…	159	114209	4	4
666	803	gi|297832552|ref|XP_002884158.1|	hypothetical protein ARALYDRAFT_900277 [Arabidopsis lyrata subsp. lyrata] >gi|297329998|gb|EFH60417.1| hypothetical protein ARALYDRAFT_900277 [Arabidopsis lyrata subsp. lyrata]	MAQPLVKKDDDHDDELEYSPFVGIEKGAVLQEARVFNDPQLDPRRCSQVITKLLYLLNQGESFTKVEATEVFFSVTKLFQSKDTGLRRMVYLIIKELSPSADEVIIVTSSLMKDMNSKIDMYRANAIRVLCRIIDGTLLTQIERYLKQAIVDKNPVVSSAALVSGLHMLKTNPEIVKRWSNEVQEAVQSRAALVQFHALALLHQIRQNDRLAVSKLVGTLTRGAVRSPLAQCLLIRYTSQIIRDMSNHGQSGERPFYDFLESCLRHKAEMVILEAARAITELDNVTSRELTPAITVLQLFLSSPKPVLRFAAVRTLNKVAMTHPMAVTNCNIDMESLISDQNRSIATLAITTLLKTGNESSVERLMKQITNFMSDIADEFKIVVVEAIRSLCLKFPLKY…	159	114677	4	4
678	815	gi|147855970|emb|CAN80740.1|	hypothetical protein [Vitis vinifera]	MSGPQCCEHPPSLNPNSGSGHVEQLGGLSCYIAGSPHSKLAILLVSDIYGYNTNCFSCMASKPDIMKNKKLADKVAAAGFYVVAPDFLYGDPYVPDKAERPLPVWIKDHGMDKGFEDTKPVIEALKSKGVSAIGAAGFCWGAKVVVELAKSGYIQAAVLLHPSFVSLDDIKGVKVPTAVLGAEIDQMSPPALVKQFEEILTAKPGVDGFVKIFPGVAHGWTVRYNAEDAGAVKCAEEAHQDMLGWFSKYVK	155	34208	6	6
678	815	gi|223535996|gb|EEF37655.1|	endo-1,3-1,4-beta-d-glucanase, putative [Ricinus communis] >gi|255567666|ref|XP_002524812.1| endo-1,3-1,4-beta-d-glucanase, putative [Ricinus communis]	MSGSQCCENPPTLSSGSGIGSVTEIGGLKVYATGPSDCKRSIVLISDIFGWEAPNLRKLADKVAAAGFYVVVPDFFYGDPYVPENADRPLPIWIKSHGTDKGFEDAKPIIAALKSKGVSAIGAAGFCWGAKVVVELAKSDPIQAAVLLHPSFVTVDDIKEIKEPIAILGAEIDHLSPPTLLKQFEEVLSARPEINGYVKIFPGVAHGWTVRYKTEDEKAVECAEEAHKDMLDWFAEYVQ	155	31883	6	6
678	815	gi|225432508|ref|XP_002277464.1|	PREDICTED: hypothetical protein [Vitis vinifera]	MSISRCYENPPSFSPGSGAGTVQEVGGGGRLKAYVTGPLDSKLAILFVSDVFGYEAPNLRKLADKVAAAGFLVVAPDFFYGDPVDLSNPNFDRQVWIAAHGTDKGCEDAKAVIAALRSKGVSAIGAAGFCWGGKVVVNLASSDHIQAAVVLHPGRITDDEINEVKTPIAILGAEIDDASPPEQLEHFGEILSAKSGVNCFVKIFPGVAHGWTVRYSVEDEWGVKSAEEAHGDMLNWFSKYALSFDSPVCLCILGVYFGSKKAMSGPQCCEHPPSLNPNSGSGHVEQLGGLSCYIAGSPHSKLAILLVSDIYGYEAPNFRKLADKVAAAGFYVVAPDFLYGDTYVPDKAERPFPVWIKDHGMDKGFEDTKPVIEALKSKGVSAIGAAGFCWGGILAAKVV…	155	64930	6	6
678	815	gi|297736970|emb|CBI26171.3|	unnamed protein product [Vitis vinifera]	MSGPQCCEHPPSLNPNSGSGHVEQLGGLSCYIAGSPHSKLAILLVSDIYGYEAPNFRKLADKVAAAGFYVVAPDFLYGDTYVPDKAERPFPVWIKDHGMDKGFEDTKPVIEALKSKGVSAIGAAGFCWGAKVVVELAKSGYIQAAVLLHPSFVSLDDIKGVKVPTAVLGAEIDQMSPPALVKQFEEILTAKPGVDGFVKIFPGVAHGWTVRYNAEDAGAVKCAEEAHQDMLGWFSKYVK	155	31921	6	6
678	815	gi|297736971|emb|CBI26172.3|	unnamed protein product [Vitis vinifera]	MSISRCYENPPSFSPGSGAGTVQEVGGGGRLKAYVTGPLDSKLAILFVSDVFGYEAPNLRKLADKVAAAGFLVVAPDFFYGDPVDLSNPNFDRQVWIAAHGTDKGCEDAKAVIAALRSKGVSAIGAAGFCWGGKVVVNLASSDHIQAAVVLHPGRITDDEINEVKTPIAILGAEIDDASPPEQLEHFGEILSAKSGVNCFVKIFPGVAHGWTVRYSVEDEWGVKSAEEAHGDMLNWFSNLKYKIKKLIKR	155	32406	6	6
688	825	gi|125600834|gb|EAZ40410.1|	hypothetical protein OsJ_24861 [Oryza sativa Japonica Group] >gi|113611626|dbj|BAF22004.1| Os07g0577600 [Oryza sativa Japonica Group] >gi|215686399|dbj|BAG87660.1| unnamed protein product [Oryza sativa Japonica Group] >gi|215679048|dbj|BAG96478.1| u	MALVSASSSTTAVAALPGAARASSFLGGAGRSGRLLLRQAESSSARASFAVRAAAPDRPIWFPGSTPPPWLDGSLPGDFGFDPLGLGSDPESLRWNVQAELVHCRWAMLGAAGIFIPEFLTKIGILNTPSWYTAGEQQYFTDTTTLFIIELILIGWAEGRRWADIIKPGCVNTDPIFPNNKLTGTDVGYPGGLWFDPLGWGTGSPEKIKELRTKEIKNGRLAMLAVMGAWFQAEYTGTGPIDNLFAHLADPGHATIFQAFTPK	153	31043	5	1
703	840	gi|108860772|sp|Q1S9I9.3|H2B1_MEDTR	RecName: Full=Probable histone H2B.1	MAPKGEKKPAEKKPAEEKKSTVAEKAPAEKKPKAGKKLPKEGGSAAGEKKKKRSKKSVETYKIYIFKVLKQVHPDIGISSKAMGIMNSFINDIFEKLAQESSRLARYNKKPTITSREIQTAVRLVLPGELAKHAVSEGTKAVTKFTSS	151	25644	8	8
703	840	gi|108860773|sp|Q1SWQ1.3|H2B2_MEDTR	RecName: Full=Probable histone H2B.2	MAPKGEKKPAEKKPAEEKKSTVAEKAPAEKKPKAGKKLPKEGGSAAGEKKKKRSKKSVETYKIYIFKVLKQVHPDIGISSKAMGIMNSFINDIFEKLTQESSRLARYNKKPTITSREIQTAVRLVLPGELAKHDVSEGTKAVTKFTSS	151	25718	8	8
703	840	gi|110736103|dbj|BAF00024.1|	histone H2B like protein [Arabidopsis thaliana]	MAKADKKPAEKKPAEKTPAAGPAAAAEKKPKAGKKLPKEPAGAGDKKKKRSKKNVETYKIYIFKVLKQVHPDIGISSKAMGIMNSFINDIFEKLAGESSKLARYNKKPTITSREIQTAVRLVLPGELAKHAVSEGTKAVTKFTSS	151	24777	8	8
703	840	gi|118481633|gb|ABK92758.1|	unknown [Populus trichocarpa]	MAPKAEKKPAEKKPAAAEKAPAEKKPRAEKKLPKEGASEKKKKRTKKNVETYKIYIFKVLKQVHPDIGISSKAMGIMNSFINDIFEKLAQESSRLARYNKKPTITSREIQTAVRLVLPGELAKHAVSEGTKAVTKFTSS	151	23971	8	8
703	840	gi|118484226|gb|ABK93993.1|	unknown [Populus trichocarpa]	MAPKAEKKPAEKKPAAAEKAPAEKKPRAEKKLPKEGVSEKKKKKAKKSVETYKIYIFKVLKQVHPDIGISSKAMGIMNSFINDIFEKLAQESSRLARYNKKPTITSREIQTAVRLVLPGELAKHAVSEGTKAVTKFTSS	151	24219	8	8
703	840	gi|118484305|gb|ABK94031.1|	unknown [Populus trichocarpa]	MAPKAEKKPAEKKPAAAEKAPAEKKPRAEKKIPKEGAIDKKKKRSKKNVETYKIYIFKVLKQVHPDIGISSKAMGIMNSFINDIFEKLAQESSRLARYNKKPTITSREIQTAVRLVLPGELAKHAVSEGTKAVTKFTSS	151	23969	8	8
703	840	gi|118485048|gb|ABK94388.1|	unknown [Populus trichocarpa]	MAPKAEKKPAEKKPAEKKPAAAEKAPAEKPRAEKKLPKEGAIDKKRKKAKKSVETYKIYIFKVLKQVHPDIGISSKAMGIMNSFINDIFEKLAQEASRLARYNKKPTITSREIQTAVRLVLPGELAKHAVSEGTKAVTKFTSS	151	24640	8	8
703	840	gi|118489591|gb|ABK96597.1|	unknown [Populus trichocarpa x Populus deltoides]	MAPKAEKKPAEKKPAAAEKAPAEKKPRAEKKLPKEGAGDKKKKRAKKSVETYKIYIFKVLKQVHPDIGISSKAMGIMNSFINDIFEKLAQESSRLARYNKKPTITSREIQTAVRLVLPGELAKHAVSEGTKAVTKFTSS	151	23870	8	8
703	840	gi|118489629|gb|ABK96616.1|	unknown [Populus trichocarpa x Populus deltoides] >gi|224065198|ref|XP_002301712.1| histone 2 [Populus trichocarpa] >gi|222843438|gb|EEE80985.1| histone 2 [Populus trichocarpa]	MAPRAEKKPAEKKPAEEKKTVAEKAPAEKKPKAGKKLPKEGGAAVAGDKKKKRVKKSTETYKIYIFKVLKQVHPDIGISSKAMGIMNSFINDIFEKLAQESSRLARYNKKPTITSREIQTAVRLVLPGELAKHAVSEGTKAVTKFTSS	151	25378	8	8
703	840	gi|12083300|gb|AAG48809.1|AF332446_1	putative histone H2B protein [Arabidopsis thaliana] >gi|22137246|gb|AAM91468.1| At1g07790/F24B9_10 [Arabidopsis thaliana] >gi|15223016|ref|NP_172258.1| HTB1; DNA binding [Arabidopsis thaliana] >gi|8439888|gb|AAF75074.1|AC007583_10 Strong similarity	MAPRAEKKPAEKKTAAERPVEENKAAEKAPAEKKPKAGKKLPPKEAGDKKKKRSKKNVETYKIYIFKVLKQVHPDIGISSKAMGIMNSFINDIFEKLAQESSKLARYNKKPTITSREIQTAVRLVLPGELAKHAVSEGTKAVTKFTSS	151	25518	8	8
703	840	gi|122894114|gb|ABM67703.1|	histone 2b [Nicotiana benthamiana]	MAPKAEKKPAEKKPAAEKAPVAAGAAEKKPKAGKKLPKDGAGAAAGDKKKKRLKKSVETYKIYIFKVLKQVHPDIGISSKAMGIMNSFINDIFEKLAQESSRLARYNKKPTITSREIQTAVRLVLPGELAKHAVSEGTKAVTKFTSS	151	24671	8	8
703	840	gi|146336941|gb|ABQ23584.1|	putative histone [Medicago truncatula]	MAPKGEKKPAEKKPAEKAPAEKTKAEKKIPKEASSADKKKKRNKKSVETYKIYIFKVLKQVHPDIGISSKAMGIMNSFINDIFEKLAQESSRLARYNKKPTITSREIQTAVRLVLPGELAKHAVSEGTKAVTKFTSS	151	23736	8	8
703	840	gi|147781362|emb|CAN67222.1|	hypothetical protein [Vitis vinifera]	MAPKAEKKPAEKKPAGGGEKKAEKAPAEKKPRAEKKLPKDASSTDKKKKRTRKNVETYKIYIFKVLKQVHPDIGISSKAMGIMNSFINDIFEKLAQEASRLARYNKKPTITSREIQTAVRLVLPGELAKHAVSEGTKAVTKFTSS	151	24876	8	8
703	840	gi|147832884|emb|CAN72813.1|	hypothetical protein [Vitis vinifera]	MAPKAEKKPAEKKPAGGEEKKAEKAPAEKKPRAEKKLPKDASSTDKKKKRTKKNVETYKIYIFKVLKQVHPDIGISSKAMGIMNSFINDIFEKLAQEASRLARYNKKPTITSREIQTAVRLVLPGELAKHAVSEGTKAVTKFTSS	151	25224	8	8
703	840	gi|147858650|emb|CAN78863.1|	hypothetical protein [Vitis vinifera] >gi|225435032|ref|XP_002284277.1| PREDICTED: similar to Histone H2B isoform 1 [Vitis vinifera]	MAPKAEKKPAEKKPASEKPTEEKKSTVAEKAPAEKKPKAGKKLPKEGAAAGDKKKKRSKKNVETYKIYIFKVLKQVHPDIGISSKAMGIMNSFINDIFEKLAQEASRLARYNKKPTITSREIQTAVRLVLPGELAKHAVSEGTKAVTKFTSS	151	26429	8	8
703	840	gi|151564660|gb|ABS17661.1|	histone H2B [Arnebia euchroma]	KIYIFKVLKQVHPDIGISSKAMGIMNSFINDIFEKLAQESSRLARYNKKPTITSREIQTAVRLVLPGELAKHAVSEGTKAVTKFTSS	151	13019	8	8
703	840	gi|15237148|ref|NP_197679.1|	HTB2; DNA binding [Arabidopsis thaliana] >gi|311812766|emb|CBX83720.1| unnamed protein product [Arabidopsis thaliana] >gi|98960883|gb|ABF58925.1| At5g22880 [Arabidopsis thaliana] >gi|10177235|dbj|BAB10609.1| histone H2B like protein [Arabidopsis tha	MAKADKKPAEKKPAEKTPAAEPAAAAEKKPKAGKKLPKEPAGAGDKKKKRSKKNVETYKIYIFKVLKQVHPDIGISSKAMGIMNSFINDIFEKLAGESSKLARYNKKPTITSREIQTAVRLVLPGELAKHAVSEGTKAVTKFTSS	151	24849	8	8
703	840	gi|158053020|dbj|BAF81889.1|	histone H2B [Nicotiana tabacum]	MAPKAEKKPAEKKPAEEKAPAEKKPKAGKKLPAKDGASGADKKKKKAKKSVETYKIYIFKVLKQVHPDIGISSKAMGIMNSFINDIFEKLAQESSRLARYNKKPTITSREIQTAVRLVLPGELAKHAVSEGTKAVTKFTSS	151	24553	8	8
703	840	gi|16323079|gb|AAL15274.1|	AT5g59910/mmn10_130 [Arabidopsis thaliana] >gi|98960893|gb|ABF58930.1| At5g59910 [Arabidopsis thaliana] >gi|56236124|gb|AAV84518.1| At5g59910 [Arabidopsis thaliana] >gi|27735192|sp|P40283.5|H2B11_ARATH RecName: Full=Histone H2B.11; AltName: Full=HTB	MAPKAEKKPAEKKPASEKPVEEKSKAEKAPAEKKPKAGKKLPKEAGAGGDKKKKMKKKSVETYKIYIFKVLKQVHPDIGISSKAMGIMNSFINDIFEKLAQEASKLARYNKKPTITSREIQTAVRLVLPGELAKHAVSEGTKAVTKFTSS	151	26782	8	8
703	840	gi|206981155|emb|CAR80422.1|	unnamed protein product [Glycine max] >gi|311813699|emb|CBX83889.1| unnamed protein product [Glycine max]	MAPKAEKKPAEEKKSTVGDKAPAEKKPKAGKKLPKEGGAGGEGKKKKRNKKSVETYKIYIFKVLKQVHPDIGISSKAMGIMNSFINDIFEKLAQESSRLARYNKKPTITSREIQTAVRLVLPGELAKHAVSEGTKAVTKFTSS	151	24452	8	8
703	840	gi|206981175|emb|CAR80432.1|	unnamed protein product [Glycine max] >gi|311813719|emb|CBX83899.1| unnamed protein product [Glycine max]	MAPPKAEKKPAEKKPAEKAPAEKKPKAEKKISKEGGSEKKKKRTKKSVETYKIYIFKVLKQVHPDIGISSKAMGIMNSFINDIFEKLAQESSRLARYNKKPTITSREIQTAVRLVLPGELAKHAVSEGTKAVTKFTSS	151	24151	8	8
703	840	gi|206981199|emb|CAR80444.1|	unnamed protein product [Glycine max] >gi|255630000|gb|ACU15352.1| unknown [Glycine max] >gi|311813743|emb|CBX83911.1| unnamed protein product [Glycine max]	MAPAKAEKKPAEKKPAEKAPAEKKPKAEKKISKEGGSEKKKKRTKKSVETYKIYIFKVLKQVHPDIGISSKAMGIMNSFINDIFEKLAQESSRLARYNKKPTITSREIQTAVRLVLPGELAKHAVSEGTKAVTKFTSS	151	24125	8	8
703	840	gi|206981207|emb|CAR80448.1|	unnamed protein product [Glycine max] >gi|311813751|emb|CBX83915.1| unnamed protein product [Glycine max]	MAKAAEKKPAAEKAPAEKKPKAEKKVPKEGSGGEKKKKRSKKSVETYKIYIFKVLKQVHPDIGISSKAMGIMNSFINDIFEKLAQEAARLARYNKKPTITSREIQTAVRLVLPGELAKHAVSEGTKAVTKFTSS	151	22945	8	8
703	840	gi|206981217|emb|CAR80453.1|	unnamed protein product [Helianthus annuus] >gi|311813763|emb|CBX83921.1| unnamed protein product [Helianthus annuus]	MAPKAEKKPAEKKPAEEKKTPAAEKAPAEKKPKAGKKLPKEAGAGATDKKKKRTKKSVETYKIYIFKVLKQVHPDIGISSKAMGIMNSFINDIFEKLAQESSRLARYNKKPTITSREIQTAVRLVLPGELAKHAVSEGTKAVTKFTSS	151	25668	8	8
703	840	gi|206981241|emb|CAR80465.1|	unnamed protein product [Linum usitatissimum] >gi|311813789|emb|CBX83934.1| unnamed protein product [Linum usitatissimum]	MAPKAAEKKPAEKKPAEEKKAEKAPAEKKPRAEKKLPKEGGAAAADKKKKRNKKNVETYKIYIFKVLKQVHPDIGISSKAMGIMNSFINDIFEKLAAESSRLARYNKKPTITSREIQTAVRLVLPGELAKHAVSEGTKAVTKFTSS	151	25219	8	8
703	840	gi|206981245|emb|CAR80467.1|	unnamed protein product [Linum usitatissimum] >gi|311813793|emb|CBX83936.1| unnamed protein product [Linum usitatissimum]	MAPKAEKKPAEKKPAEEKKTVAEKAPAEKKPKAGKKLPKEAGAAAAGDKKKKKSKKSVETYKIYIFKVLKQVHPDIGISSKAMGIMNSFINDIFEKLAQESSRLARYNKKPTITSREIQTAVRLVLPGELAKHAVSEGTKAVTKFTSS	151	25903	8	8
703	840	gi|207008774|emb|CAR80300.1|	unnamed protein product [Solanum lycopersicum] >gi|311812842|emb|CBX83758.1| unnamed protein product [Solanum lycopersicum]	MKPAEKKPAEKTPVAEKAPAEKKPKAGKKLPKDAAAGDKKKKRSKKAVETYKIYIFKVLKQVHPDIGISSKAMGIMNSFINDIFEKLAQEASRLARYNKKPTITSREIQTAVRLVLPGELAKHAVSEGTKAVTKFTSS	151	23684	8	8
703	840	gi|207008810|emb|CAR80319.1|	unnamed protein product [Arabidopsis thaliana] >gi|311813475|emb|CBX83777.1| unnamed protein product [Arabidopsis thaliana] >gi|21554180|gb|AAM63259.1| histone H2B-like protein [Arabidopsis thaliana]	MAPKAEKKPAEKKPASEKPVEEKSKAEKAPAEKKPKAGKKLPKEAGAGGDKKKKMKKKSVETYKIYIFKVLKQVHPDIGISSKAMGIMNSFINDIFEKLAQEASKLARYNKXPTITSREIQTAVRLVLPGELAKHAVSEGTKAVTKFTSS	151	26461	8	8
703	840	gi|207008822|emb|CAR80325.1|	unnamed protein product [Cicer arietinum] >gi|311813487|emb|CBX83783.1| unnamed protein product [Cicer arietinum] >gi|7635498|emb|CAB88668.1| histone H2B [Cicer arietinum]	MAPAKAEKKPAEKKPAAEKAPAEKKPKAEKKISKEGTSDKKKKRVKKSVETYKIYIFKVLKQVHPDIGISSKAMGIMNSFINDIFEKLAQEASRLARYNKKPTITSREIQTAVRLVLPGELAKHAVSEGTKAVTKFTSS	151	24209	8	8
703	840	gi|207008932|emb|CAR80380.1|	unnamed protein product [Brassica napus] >gi|311813615|emb|CBX83847.1| unnamed protein product [Brassica napus]	MAPKAGKKPAEKKPAAAAEKPAEEVAEKAPAEKKPKAGKKLPKEAGAIDKKKKRNKKSIETYKIYIFKVLKQVHPDIGISSKAMGIMNSFINDIFEKLAQEASKLARYNKKPTITSREIQTAVRLVLPGELAKHAVSEGTKAVTKFTSS	151	25675	8	8
703	840	gi|21553526|gb|AAM62619.1|	putative histone H2B [Arabidopsis thaliana] >gi|207008684|emb|CAR80255.1| unnamed protein product [Arabidopsis thaliana] >gi|16209685|gb|AAL14400.1| At2g28720/T11P11.3 [Arabidopsis thaliana] >gi|15226943|ref|NP_180440.1| histone H2B, putative [Arabi	MAPKAGKKPAEKKPAEKAPAEEEKVAEKAPAEKKPKAGKKLPKEAVTGGVEKKKKRVKKSTETYKIYIFKVLKQVHPDIGISSKAMGIMNSFINDIFEKLAQEASKLARYNKKPTITSREIQTAVRLVLPGELAKHAVSEGTKAVTKFTSS	151	26254	8	8
703	840	gi|21617908|gb|AAM66958.1|	histone H2B [Arabidopsis thaliana]	MAPRAEKKPAEKKTAAEKPVEENKAAEKAPAEKKPKAGKKLPPKEAGDKKKKRSKKNVETYKIYIFKVLKQVHPDIGISSKAMGIMNSFINDIFEKLAQESSKLARYNKKPTITSREIQTAVRLVLPGELAKHAVSEGTKAVTKFTSS	151	25794	8	8
703	840	gi|217071596|gb|ACJ84158.1|	unknown [Medicago truncatula]	MAPKGEKKPAEKKPAEEKKSTVAEKAPAEKKPKAGKKLPKEGGSAAGEKKKKRSKKNVETYKIYIFKVLKQVHPDIGISSKAMGIMNSFINDIFEKLAQESSRLARYNKKPTITSREIQTAVRLVLPGELAKHAVSEGTKAVTKFTSS	151	25671	8	8
703	840	gi|222850604|gb|EEE88151.1|	histone 2 [Populus trichocarpa] >gi|224106525|ref|XP_002314196.1| histone 2 [Populus trichocarpa] >gi|222848822|gb|EEE86369.1| histone 2 [Populus trichocarpa] >gi|224079417|ref|XP_002305858.1| histone 2 [Populus trichocarpa]	KSTETYKIYIFKVLKQVHPDIGISSKAMGIMNSFINDIFEKLAQESSRLARYNKKPTITSREIQTAVRLVLPGELAKHAVSEGTKAVTKFTSS	151	14032	8	8
703	840	gi|222864380|gb|EEF01511.1|	histone H2 [Populus trichocarpa] >gi|224109876|ref|XP_002315340.1| histone H2 [Populus trichocarpa]	MAPKAAEKKPAEKKPAAAEKAPAEKKPRAEKKIPKEGAIDKKKKRSKKNVETYKIYIFKVLKQVHPDIGISSKAMGIMNSFINDIFEKLAQEASRLARYNKKPTITSREIQTAVRLVLPGELAKHAVSEGTKAVTKFTSS	151	24024	8	8
703	840	gi|222864382|gb|EEF01513.1|	histone H2 [Populus trichocarpa] >gi|224109882|ref|XP_002315342.1| histone H2 [Populus trichocarpa]	MAPKAAEKKPAEKKPAAAEKAPAEKKPRAEKKIPKEGAIDKKKKRSKKNVETYKIYIFKVLKQVHPDIGISSKAMGIMNSFINDIFEKLAQESSRLARYNKKPTITSREIQTAVRLVLPGELAKHAVSEGTKAVTKFTSS	151	24040	8	8
703	840	gi|222865448|gb|EEF02579.1|	histone H2 [Populus trichocarpa] >gi|224113151|ref|XP_002316408.1| histone H2 [Populus trichocarpa]	KSVETYKIYIFKVLKQVHPDIGISSKAMGIMNSFINDIFEKLAQESSRLARYNKKPTITSREIQTAVRLVLPGELAKHAVSEGTKAVTKFTSS	151	14030	8	8
703	840	gi|223537038|gb|EEF38674.1|	histone h2b, putative [Ricinus communis] >gi|255565487|ref|XP_002523734.1| histone h2b, putative [Ricinus communis]	MAPKQEKKPAEKKPVAEKAPAEKKPRAEKKLPKEGPGAGADKKKKRAKKSIETYKIYIFKVLKQVHPDIGISSKAMGIMNSFINDIFEKLAQEAARLARYNKKPTITSREIQTAVRLVLPGELAKHAVSEGTKAVTKFTSS	151	24091	8	8
703	840	gi|225435034|ref|XP_002284287.1|	PREDICTED: similar to Histone H2B isoform 3 [Vitis vinifera]	MAPKAEKKPAEKKPASEKPTEEKKSTKLPKEGAAAGDKKKKRSKKNVETYKIYIFKVLKQVHPDIGISSKAMGIMNSFINDIFEKLAQEASRLARYNKKPTITSREIQTAVRLVLPGELAKHAVSEGTKAVTKFTSS	151	23375	8	8
703	840	gi|225435036|ref|XP_002284281.1|	PREDICTED: similar to Histone H2B isoform 2 [Vitis vinifera]	MAPKAEKKPAEKKPKPKAGKKLPKEGAAAGDKKKKRSKKNVETYKIYIFKVLKQVHPDIGISSKAMGIMNSFINDIFEKLAQEASRLARYNKKPTITSREIQTAVRLVLPGELAKHAVSEGTKAVTKFTSS	151	22669	8	8
703	840	gi|225435046|ref|XP_002284332.1|	PREDICTED: hypothetical protein isoform 1 [Vitis vinifera]	MAPKAEKKPAEKKPAEEKKSTVAEKAPAEKKPKAGKKLPKEGGAGPGDKKKKRTKKSVETYKIYIFKVLKQVHPDIGISSKAMGIMNSFINDIFEKLAQESSRLARYNKKPTITSREIQTAVRLVLPGELAKHAVSEGTKAVTKFTSS	151	25654	8	8
703	840	gi|225435048|ref|XP_002284338.1|	PREDICTED: hypothetical protein isoform 3 [Vitis vinifera]	MAPKAEKKPAEKKPAEEKKSTAGKKLPKEGGAGPGDKKKKRTKKSVETYKIYIFKVLKQVHPDIGISSKAMGIMNSFINDIFEKLAQESSRLARYNKKPTITSREIQTAVRLVLPGELAKHAVSEGTKAVTKFTSS	151	23161	8	8
703	840	gi|225435050|ref|XP_002284336.1|	PREDICTED: hypothetical protein isoform 2 [Vitis vinifera]	MAPKAEKKPAEKKPKPKAGKKLPKEGGAGPGDKKKKRTKKSVETYKIYIFKVLKQVHPDIGISSKAMGIMNSFINDIFEKLAQESSRLARYNKKPTITSREIQTAVRLVLPGELAKHAVSEGTKAVTKFTSS	151	22741	8	8
703	840	gi|225435052|ref|XP_002284344.1|	PREDICTED: hypothetical protein [Vitis vinifera]	MAPKAEKKPAEKKPAEEKKTVAEKAPAEKKPKAGKKLPKEAGAAAGDKKKKRTKKSVETYKIYIFKVLKQVHPDIGISSKAMGIMNSFINDIFEKLAQEASRLARYNKKPTITSREIQTAVRLVLPGELAKHAVSEGTKAVTKFTSS	151	25553	8	8
703	840	gi|225435054|ref|XP_002284357.1|	PREDICTED: hypothetical protein [Vitis vinifera]	MAPKAEKKPAEKKPAEEKKTVAEKSPAEKKPKAGKKLPKEAGAATDKKKKRTKKSVETYKIYIFKVLKQVHPDIGISSKAMGIMNSFINDIFEKLAQEASRLARYNKKPTITSREIQTAVRLVLPGELAKHAVSEGTKAVTKFTSS	151	25542	8	8
703	840	gi|225448892|ref|XP_002264142.1|	PREDICTED: hypothetical protein [Vitis vinifera]	MAPKAEKKPAEKKPAGGEEKKAEKAPAEKKPRAEKKLPKDASSTDKKKKRTRKNVETYKIYIFKVLKQVHPDIGISSKAMGIMNSFINDIFEKLAQEASRLARYNKKPTITSREIQTAVRLVLPGELAKHAVSEGTKAVTKFTSS	151	24948	8	8
703	840	gi|255583734|ref|XP_002532620.1|	histone h2b, putative [Ricinus communis] >gi|223527640|gb|EEF29751.1| histone h2b, putative [Ricinus communis]	MAPKPAEKKPAEKKPAEKAPAEKKPRAEKKLPKEGGSAATDKKRKKAKKSVETYKIYIFKVLKQVHPDIGISSKAMGIMNSFINDIFEKLAQESSRLARYNKKPTITSREIQTAVRLVLPGELAKHAVSEGTKAVTKFTSS	151	24084	8	8
703	840	gi|255583736|ref|XP_002532621.1|	histone h2b, putative [Ricinus communis] >gi|223527641|gb|EEF29752.1| histone h2b, putative [Ricinus communis]	MAPKAAEKKPAEKKPAEKAPAEKKPRAEKKLPKEGGSAGADKKRKKAKKSVETYKIYIFKVLKQVHPDIGISSKAMGIMNSFINDIFEKLAQESSRLARYNKKPTITSREIQTAVRLVLPGELAKHAVSEGTKAVTKFTSS	151	24014	8	8
703	840	gi|255584776|ref|XP_002533106.1|	histone h2b, putative [Ricinus communis] >gi|223527097|gb|EEF29278.1| histone h2b, putative [Ricinus communis]	MAPKTEKKPAEKKPAEEKKTVAEKAPAEKKPKAGKKLPKEGGAAAAGDKKKKRTKKSIETYKIYIFKVLKQVHPDIGISSKAMGIMNSFINDIFEKLAQEASRLARYNKKPTITSREIQTAVRLVLPGELAKHAVSEGWIYPILNS	151	24982	8	8
703	840	gi|255586965|ref|XP_002534080.1|	histone h2b, putative [Ricinus communis] >gi|223525881|gb|EEF28303.1| histone h2b, putative [Ricinus communis]	MAQKAEKKPAEKAPAEKKPRAEKKLPKEGGSAATDKKKKKAKKSVETYKIYIFKVLKQVHPDIGISSKAMGIMNSFINDIFEKLAQESSRLARYNKKPTITSREIQTAVRLVLPGELAKHAVSEGTKAVTKFTSS	151	23133	8	8
703	840	gi|255626455|gb|ACU13572.1|	unknown [Glycine max]	MAKGEKKPAEKKPAAEKAPAEKTKAEKKIPKDAASGEKKKKRTKKSVETYKIYIFKVLKQVHPDIGISSKAMGIMNSFINDIFEKLAQESSRLARYNKKPTITSREIQTAVRLVLPGELAKHAVSEGTKAVTKFTSS	151	23667	8	8
703	840	gi|2935450|gb|AAC05126.1|	histone H2B [Malus x domestica]	KSVETYKIYIFKVLKQVHPDIGISSKAMGIMNSFINDIFEKLAQESSRLARYNKKPTITSREIQTSVRLVLPGELAKHAVSEGTKAVTKFTSS	151	14046	8	8
703	840	gi|297310493|gb|EFH40917.1|	hypothetical protein ARALYDRAFT_496128 [Arabidopsis lyrata subsp. lyrata] >gi|297793547|ref|XP_002864658.1| hypothetical protein ARALYDRAFT_496128 [Arabidopsis lyrata subsp. lyrata]	KAEKKPAEKKPASEKPVEEKSKAEKAPAEKKPKAGKKLPKEAGAGGDKKKKMKKKSIETYKIYIFKVLKQVHPDIGISSKAMGIMNSFINDIFEKLAQEASKLARYNKKPTITSREIQTAVRLVLPGELAKHAVSEGTKAVTKFT	151	26323	8	8
703	840	gi|297319938|gb|EFH50360.1|	hypothetical protein ARALYDRAFT_489144 [Arabidopsis lyrata subsp. lyrata] >gi|297812435|ref|XP_002874101.1| hypothetical protein ARALYDRAFT_489144 [Arabidopsis lyrata subsp. lyrata]	MAKADKKPAEKKPAEKTPAAEPAAAAEKKPKAGKKLPREPAVAGDKKKKRSKKNVETYKIYIFKVLKQVHPDIGISSKAMGIMNSFINDIFEKLAGESSKLARYNKKPTITSREIQTAVRLVLPGELAKHAVSEGTKAVTKFTST	151	24629	8	8
703	840	gi|297323289|gb|EFH53710.1|	hypothetical protein ARALYDRAFT_484983 [Arabidopsis lyrata subsp. lyrata] >gi|7630031|emb|CAB88327.1| histone H2B-like protein [Arabidopsis thaliana] >gi|297819136|ref|XP_002877451.1| hypothetical protein ARALYDRAFT_484983 [Arabidopsis lyrata subsp.	MAPKAEKKPAEKKPVEEKSKAEKAPAEKKPKAGKKLPKEAGAGGDKKKKMKKKSVETYKIYIFKVLKQVHPDIGISSKAMGIMNSFINDIFEKLASESSKLARYNKKPTITSREIQTAVRLVLPGELAKHAVSEGTKAVTKFTSS	151	25941	8	8
703	840	gi|297325021|gb|EFH55441.1|	hypothetical protein ARALYDRAFT_901825 [Arabidopsis lyrata subsp. lyrata] >gi|297822599|ref|XP_002879182.1| hypothetical protein ARALYDRAFT_901825 [Arabidopsis lyrata subsp. lyrata]	MAPKAGKKPAEKKLSAAEKAPAVEEEKVAEKAPAEKKPKAGKKLPKEAVTGGVDKKKKRVKKSTETYKIYIFKVLKQVHPDIGISSKAMGIMNSFINDIFEKLAQEASKLARYNKKPTITSREIQTAVRLVLPGELAKHAVSEGTKAVTKFTSS	151	26513	8	8
703	840	gi|297746124|emb|CBI16180.3|	unnamed protein product [Vitis vinifera]	MAPKAEKKPAEKKPAEEKKSTRTKKSVETYKIYIFKVLKQVHPDIGISSKAMGIMNSFINDIFEKLAQESSRLARYNKKPTITSREIQTAVRLVLPGELAKHAVSEGTKAVTKFTSS	151	19156	8	8
703	840	gi|297746125|emb|CBI16181.3|	unnamed protein product [Vitis vinifera] >gi|297746126|emb|CBI16182.3| unnamed protein product [Vitis vinifera]	MAPKAEKKPAEKKPAEEKKTRTKKSVETYKIYIFKVLKQVHPDIGISSKAMGIMNSFINDIFEKLAQEASRLARYNKKPTITSREIQTAVRLVLPGELAKHAVSEGTKAVTKFTSS	151	19053	8	8
703	840	gi|297789598|ref|XP_002862747.1|	hypothetical protein ARALYDRAFT_333229 [Arabidopsis lyrata subsp. lyrata] >gi|297308453|gb|EFH39005.1| hypothetical protein ARALYDRAFT_333229 [Arabidopsis lyrata subsp. lyrata]	MVDGEEEEEKSKAEKAPAEKKPKAGKKLPKEAGAGGDKKKKMKKKSIETYKIYIFKVLKQVHPDIGISSKAMGIMNSFINDIFEKLAQEASKLARYNKKPTITSREIQTAVRLVLPGELAKHAVSEGTKAVTKFTSS	151	23615	8	8
703	840	gi|297843566|ref|XP_002889664.1|	hypothetical protein ARALYDRAFT_470811 [Arabidopsis lyrata subsp. lyrata] >gi|297335506|gb|EFH65923.1| hypothetical protein ARALYDRAFT_470811 [Arabidopsis lyrata subsp. lyrata]	MAPRAEKKPAEKKPAAEKPVEENKAAEKAPAEKKPKAGKKLPPTKEAGDKKKKRSKKNIETYKIYIFKVLKQVHPDIGISSKAMGIMNSFINDIFEKLAQESSKLARYNKKPTITSREIQTAVRLVLPGELAKHAVSEGTKAVTKFTSS	151	25905	8	8
703	840	gi|30102580|gb|AAP21208.1|	At3g45980 [Arabidopsis thaliana] >gi|7339499|emb|CAB82822.1| histone H2B [Arabidopsis thaliana] >gi|110743640|dbj|BAE99657.1| histone H2B [Arabidopsis thaliana] >gi|311812758|emb|CBX83716.1| unnamed protein product [Arabidopsis thaliana] >gi|7509793	MAPRAEKKPAEKKPAAEKPVEEKSKAEKAPAEKKPKAGKKLPKEAGAGGDKKKKMKKKSVETYKIYIFKVLKQVHPDIGISSKAMGIMNSFINDIFEKLASESSKLARYNKKPTITSREIQTAVRLVLPGELAKHAVSEGTKAVTKFTSS	151	26465	8	8
703	840	gi|3021485|emb|CAA12231.1|	histone H2B-3 [Solanum lycopersicum] >gi|75278464|sp|O65819.1|H2B3_SOLLC RecName: Full=Histone H2B.3; AltName: Full=LeH2B-3	KPAEKKPAEKTPVAEKAPAEKKPKAGKKLPKDAAAGDKKKKRSKKAVETYKIYIFKVLKQVHPDIGISSKAMGIMNSFINDIFEKLAQEASRLARYNKKPTITSREIQTAVRLVLPGELAKHAVSEGTKAVTKFTSS	151	23553	8	8
703	840	gi|311813485|emb|CBX83782.1|	unnamed protein product [Arabidopsis thaliana] >gi|1617013|emb|CAA69025.1| histone H2B like protein [Arabidopsis thaliana] >gi|207008820|emb|CAR80324.1| unnamed protein product [Arabidopsis thaliana]	MAKADKKPAEKKPAEKTPAAEPAAAAEKKPKAGKKLPEEPAGAGDKKKKRSKKNVETYKIYIFKVLKQVHPDIGISSKAMGIMNSFINDIFEKLAGESSKLARYNKKPTITSREIQTAVRLVLPGELAKHAVSEGTKAVTKFTSS	151	24546	8	8
703	840	gi|311813637|emb|CBX83858.1|	unnamed protein product [Brassica napus] >gi|207005320|emb|CAR80391.1| unnamed protein product [Brassica napus]	MAPKAEKKPAEEKSKAEKAPAEKKPKAGKKLPKEAGAGAGGDKKKKTKKKSVETYKIYIFKVLKQVHPDIGISSKAMGIMNSFINDIFEKLAGEASKLARYNKKPTITSREIQTAVRLVLPGELAKHAVSEGTKAVTKFTSS	151	24803	8	8
703	840	gi|311813659|emb|CBX83869.1|	unnamed protein product [Glycine max] >gi|206981115|emb|CAR80402.1| unnamed protein product [Glycine max]	MAPAKAEKKPAEKKPAAEKAPAEKKPKAEKKISKEGGSEKKKKRTKKSVETYKIYIFKVLKQVHPDIGISSKAMGIMNSFINDIFEKLAQEASRLARYNKKPTITSREIQTAVRLVLPGELAKHAVSEGTKAVTKFTSS	151	24180	8	8
703	840	gi|311813683|emb|CBX83881.1|	unnamed protein product [Glycine max] >gi|206981139|emb|CAR80414.1| unnamed protein product [Glycine max]	MAPKAEKKPAEKKPAEEKKSTVGDKAPAEKKPKAGKKLPKEGGAGGEGGKKKKRNKKSVETYKIYIFKVLKQVHPDIGISSKAMGIMNSFINDIFEKLAQESSRLARYNKKPTITSREIQTAVRLVLPGELAKHAVSEGTKAVTKFTSS	151	25670	8	8
703	840	gi|311813731|emb|CBX83905.1|	unnamed protein product [Glycine max] >gi|255626827|gb|ACU13758.1| unknown [Glycine max] >gi|206981187|emb|CAR80438.1| unnamed protein product [Glycine max]	MAPKAEKKPAEKKPAEEKKSTVGDKAPAEKKPKAGKKLPKEGGAGGEGKKKKRNKKSVETYKIYIFKVLKQVHPDIGISSKAMGIMNSFINDIFEKLAQESSRLARYNKKPTITSREIQTAVRLVLPGELAKHAVSEGTKAVTKFTSS	151	25613	8	8
703	840	gi|311813745|emb|CBX83912.1|	unnamed protein product [Glycine max] >gi|206981201|emb|CAR80445.1| unnamed protein product [Glycine max]	MAKGEKKPAEKKPAEKAPAEKTKAEKKIPKEPASGEKKKKKRNKKSVETYKIYIFKVLKQVHPDIGISSKAMGIMNSFINDIFEKLAQESSRLARYNKKPTITSREIQTAVRLVLPGELAKHAVSEGTKAVTKFTS	151	23994	8	8
703	840	gi|42565385|gb|AAS20969.1|	histone H2B [Hyacinthus orientalis]	PGFTIHSNFHQPPTASRWRPRRRRSPREKKPAAADKPAGGAQGRSRRRPRRPPPGKKPKAEKKLPAKDAAAATDKKKKKKKGKGVETYKIYIFKVLKQVHPDIGISSKAMGIMNSFINDIFEKLAQESSRLARYNKKPTITSREIQTSVRLVLPGELAKHAVSDGTKAVTKFTSAPGFTIHSNFHQPPTASRWRPRRRRSPREKKPAAADKPAGGAQGRSRRRPRRPPPGKKPKAEKKLPAKDAAAATDKKKKKKKGKGVETYKIYIFKVLKQVHPDIGISSKAMGIMNSFINDIFEKLAQESSRLARYNKKPTITSREIQTSVRLVLPGELAKHAVSDGTKAVTKFTSA	151	55665	8	8
703	840	gi|563329|emb|CAA57778.1|	histone 2B [Asparagus officinalis]	KKPAEKKPAAEKPDEEPKAEKKAEKAPAGKKPKAEKRLPSKEGGGDKSGVGKAKKKKKAKSVETYKIYIFKVLKQVHPDIGISSKAMGIMNSFINDIFEKLAQEASRLARYNKKPTITSREIQTSVRLVLPGELAKHAVSEGTKAVTKFTSS	151	26645	8	8
703	840	gi|56675662|emb|CAA64986.2|	Histone H2b homologue [Allium cepa]	EKKLPAKESSTTADKKKKRKSKSVETYKIYIFKVLKQVHPDIGISSKAMGIMNSFINDIFEKLAQESAKLARYNKKPTITSREIQTSVRLVLPGELAKHAVFLGTRRWLKFXX	151	19008	8	8
703	840	gi|7387726|sp|O22582.3|H2B_GOSHI	RecName: Full=Histone H2B >gi|2558962|gb|AAB97163.1| histone H2B1 [Gossypium hirsutum] >gi|311813559|emb|CBX83819.1| unnamed protein product [Gossypium hirsutum] >gi|207008894|emb|CAR80361.1| unnamed protein product [Gossypium hirsutum]	MAPKAEKKPAEKKPAEEKKAVAEKAPAEKKPKAGKKLPKEGGAAAGDKKKKRVKKSVETYKIYIFKVLKQVHPDIGISSKAMGIMNSFINDIFEKLAQEASRLARYNKKPTITSREIQTAVRLVLPGELAKHAVSEGTKAVTKFTSS	151	25507	8	8
703	840	gi|82400146|gb|ABB72812.1|	histone H2B-like protein [Solanum tuberosum]	MAPKAEKKPAEKKPAEEKKSTVAEKAPAEKKPKAGKKLPKDAASGEKKKKKAKKSVETYKIYIFKVLKQVHPDIGISSKAMGIMNSFINDIFEKLAQESSRLARYNKKPTITSREIQTAVRLVLPGELAKHAVSEGTKAVTKFTSS	151	25790	8	8
709	846	gi|17976705|emb|CAC80839.2|	folylpolyglutamate synthetase, chloroplastic isoform [Arabidopsis thaliana]	MFAVSIVPRTTSCRLSSAFLCQLSIPLTLRLHHHYQHHQPHLPSPLSFQIHSLRKQIDMAAQGGDSYEEALAALSSLITKRSRADKSNKGDRFELVFDYLKLLDLEEDILKMNVIHVAGTKGKGSTCTFTESIIRNYGFRTGLFTSPHLIDVRERFRLDGVDISEEKFLGYFWWCYNRLKERTNEEIPMPTYFRFLALLAFKIFAAEEVDAAILEVGLGGKFDATNAVHKPVVCGISSLGYDHMEILGDTLGKIAGEKAGIFKLGVPAFTVPQPDEAMRVLEEKASETEVNLEVVQPLTARLLSGQKLGLDGEHQYVNAGLAVSLASIWLQQIGKLEVPSRTQMSILPEKFIKGLATASLQGRAQVVPDQYTESRTSGDLVFYLDGAHSPESMEACAKW…	150	74227	2	2
709	846	gi|222424313|dbj|BAH20113.1|	AT5G05980 [Arabidopsis thaliana]	HYQHHQPHLPSPLSFQIHSLRKQIDMAAQGGDSYEEALAALSSLITKRSRADKSNKGDRFELVFDYLKLLDLEEDILKMNVIHVAGTKGKGSTCTFTESIIRNYGFRTGLFTSPHLIDVRERFRLDGVDISEEKFLGYFWWCYNRLKERTNEEIPMPTYFRFLALLAFKIFAAEEVDAAILEVGLGGKFDATNAVQKPVVCGISSLGYDHMEILGDTLGKIAGEKAGIFKLGVPAFTVPQPDEAMRVLEEKASETEVNLEVVQPLTARLLSGQKLGLDGEHQYVNAGLAVSLASIWLQQIGKLEVPSRTQMSILPEKFIKGLATASLQGRAQVVPDQYTESRTSGDLVFYLDGAHSPESMEACAKWFSVAVKGDNQSGSSGHLVNGSAGSSHDKWSNET…	150	70425	2	2
709	846	gi|225449366|ref|XP_002277686.1|	PREDICTED: hypothetical protein [Vitis vinifera]	MTDGDDGLLESTVSPYQEVLDALSSLITKRSRGDKSNKRVLFDVLFDYLKMLDLDEPISKMKIIHVAGTKGKGSTCTFTESILRNCGFRTGLFTSPHLIDVRERFRLDGVEICEEKFLAYFWWCWDRLKVDVVILEVGLGGRLDATNVQEPIVCGITSLGYDHMEILGHTLGEIAGEKAGIFKRGVPAFTVPQPEEAMCVLEAKASQLDVPLQVIPPMDASLLNGLKLGLEGEHQYLNAGLAIALCSTWLQRTSHLEINYLEQTSSLPEQFIKGLTTASLQGRAQIVPDRCINIESPGDLVFYLDGAHSPESMEICARWFSLAIKEDDQQPTLNYQPQDDVGSSRELVQKDYHGTSRKNTTQILLFNCMSVRDPHLLLPHLMNTCASHGVHFKQALFVP…	150	69406	2	2
709	846	gi|296086169|emb|CBI31610.3|	unnamed protein product [Vitis vinifera]	MGLMTSISSAGNKIHRFVSSSQIFLSNPTLRLLTFFFCIGLAPATPLFLVFPFFFFSFFSLSIHRYFLILSLELRKHGHIDMTDGDDGLLESTVSPYQEVLDALSSLITKRSRGDKSNKRVLFDVLFDYLKMLDLDEPISKMKIIHVAGTKGKGSTCTFTESILRNCGFRTGLFTSPHLIDVRERFRLDGVEICEEKFLAYFWWCWDRLKEKTDEDVPMPTFFHFIALLAFKIFAAEQVDVVILEVGLGGRLDATNVVQEPIVCGITSLGYDHMEILGHTLGEIAGEKAGIFKRGVPAFTVPQPEEAMCVLEAKASQLDVPLQVIPPMDASLLNGLKLGLEGEHQYLNAGLAIALCSTWLQRTSHLEINYLEQTSSLPEQFIKGLTTASLQGRAQIVPD…	150	79179	2	2
709	846	gi|297810697|ref|XP_002873232.1|	hypothetical protein ARALYDRAFT_487401 [Arabidopsis lyrata subsp. lyrata] >gi|297319069|gb|EFH49491.1| hypothetical protein ARALYDRAFT_487401 [Arabidopsis lyrata subsp. lyrata]	MYAVSIVPRTTSCRLSSAFFCHLSIPLTLGLHHHYQHQQPHLTSLSFQIRSLRKQIDMAAQGGDSYEEALAALSSLITKRSRADKSNKGDRFELVFDYLKLLDLEEDILKMKVIHVAGTKGKGSTCTFTESIIRNYGFRTGLFTSPHLIDVRERFRLDGVDISEEKFLGYFWWCYNRLKERTNEEIPMPTYFRFLALLAFKIFAAEEVDAAILEVGLGGKFDATNAVQKPMVCGISSLGYDHMEILGDTLGKIAGEKAGIFKLGVPAFTVPQPDEAMRVLEEKASESEVNLEVVQPLTTRLLSGQKLGLDGEHQYLNAGLAVSLASTWLQKIGKLEVPSRTQMSILPEQFIKGLATASLQGRAQVVPDQYTESRTSGDLVFYLDGAHSPESMEACAKWF…	150	74204	2	2
709	846	gi|30681208|ref|NP_196217.2|	ATDFB (A. THALIANA DHFS-FPGS HOMOLOG B); tetrahydrofolylpolyglutamate synthase [Arabidopsis thaliana]	MFAVSIVPRTTSCRLSSAFLCQLSIPLTLRLHHHYQHHQPHLPSPLSFQIHSLRKQIDMAAQGGDSYEEALAALSSLITKRSRADKSNKGDRFELVFDYLKLLDLEEDILKMNVIHVAGTKGKGSTCTFTESIIRNYGFRTGLFTSPHLIDVRERFRLDGVDISEEKFLGYFWWCYNRLKERTNEEIPMPTYFRFLALLAFKIFAAEEVDAAILEVGLGGKFDATNAVQKPVVCGISSLGYDHMEILGDTLGKIAGEKAGIFKLGVPAFTVPQPDEAMRVLEEKASETEVNLEVVQPLTARLLSGQKLGLDGEHQYVNAGLAVSLASIWLQQIGKLEVPSRTQMSILPEKFIKGLATASLQGRAQVVPDQYTESRTSGDLVFYLDGAHSPESMEACAKW…	150	74218	2	2
709	846	gi|79327065|ref|NP_001031840.1|	ATDFB (A. THALIANA DHFS-FPGS HOMOLOG B); tetrahydrofolylpolyglutamate synthase [Arabidopsis thaliana]	MAAQGGDSYEEALAALSSLITKRSRADKSNKGDRFELVFDYLKLLDLEEDILKMNVIHVAGTKGKGSTCTFTESIIRNYGFRTGLFTSPHLIDVRERFRLDGVDISEEKFLGYFWWCYNRLKERTNEEIPMPTYFRFLALLAFKIFAAEEVDAAILEVGLGGKFDATNAVQKPVVCGISSLGYDHMEILGDTLGKIAGEKAGIFKLGVPAFTVPQPDEAMRVLEEKASETEVNLEVVQPLTARLLSGQKLGLDGEHQYVNAGLAVSLASIWLQQIGKLEVPSRTQMSILPEKFIKGLATASLQGRAQVVPDQYTESRTSGDLVFYLDGAHSPESMEACAKWFSVAVKGDNQSGSSGHLVNGSAGSSHDKWSNETCEQILLFNCMSVRDPNLLLPHLKNM…	150	67097	2	2
717	854	gi|118481719|gb|ABK92799.1|	unknown [Populus trichocarpa]	MPFKRYVEIGRVALVNYGKEYGRLVVIVDVIDQNRALVDAPDMVRSQMNFKRLSLTDIRIEINRVPKKKALIEAMEKADVKNKWEKSSWGRRLIVQQRRAALNDFDRFKLMLAKIKRGGLIRQELAKLKKENAA	148	20801	5	4
717	854	gi|168066227|ref|XP_001785043.1|	predicted protein [Physcomitrella patens subsp. patens] >gi|162663392|gb|EDQ50158.1| predicted protein [Physcomitrella patens subsp. patens]	MVFRRFVEIGRVALINYGPHYGKLVVIVDVIDQNRALVDAPDMVRTQINFKRLSLTDITIPELPRTPPKKVLKKAYDDAEVEQRWANCAWGKKLAVRTNRASLNDFDRFVVMVARVKRSCIVRRELGKLRREKA	148	19304	5	4
717	854	gi|222842494|gb|EEE80041.1|	predicted protein [Populus trichocarpa] >gi|224062127|ref|XP_002300768.1| predicted protein [Populus trichocarpa] >gi|118487904|gb|ABK95774.1| unknown [Populus trichocarpa]	MPFKRYVEIGRVALVNYGKDYGKLVVIVDVIDQNRALVDAPDMVRSQMNFKRLSLTDIKIEINRVPKKKALIEAMEKADVKNKWENSSWGRRLTVQKRRASLNDFDRFKLMLAKIKKAGIVRQELARLKKEAA	148	21215	5	4
717	854	gi|222857107|gb|EEE94654.1|	predicted protein [Populus trichocarpa] >gi|118485504|gb|ABK94606.1| unknown [Populus trichocarpa] >gi|224085670|ref|XP_002307658.1| predicted protein [Populus trichocarpa]	MPFKRYVEIGRVALVNYGKDYGKLVVIVDVIDQNRALVDAPDMVRSQMNFKRLSLTDIKIEINRVPKKKALIEAMEKADVKNKWENSSWGRRLTVQKRRASLNDFDRFKLMLAKIKKAGIVRQELAKLKKETA	148	21522	5	4
717	854	gi|223530668|gb|EEF32541.1|	60S ribosomal protein L14, putative [Ricinus communis] >gi|255577936|ref|XP_002529840.1| 60S ribosomal protein L14, putative [Ricinus communis]	MPFKRYVEIGRVALVNYGKDYGKLVVIVDVIDQNRALVDAPDMVRSQMNFKRLTLTDIKIDIKRVPRKKTLIEAMENADVKNKWENSSWGRKLIVQKRRASLNDFDRFKLMLAKIKRGGFIRQELAKLKKEAA	148	21291	5	4
717	854	gi|224102199|ref|XP_002312586.1|	predicted protein [Populus trichocarpa] >gi|222852406|gb|EEE89953.1| predicted protein [Populus trichocarpa]	MPFKRYVEIGRVALVNYGKEYGRLVVIVDVIDQNRALVDAPDMVRSQMNFKRLSLTDIKIEINRVPKKKALIEAMEKADVKNKWEKSSWGRRLIVQQRRAALNDFDRFKLMLAKIKRGGLIRQELAKLKKENAA	148	21077	5	4
717	854	gi|225433183|ref|XP_002285313.1|	PREDICTED: hypothetical protein [Vitis vinifera]	MPFKRYVEVGRVALVNYGKDYGRLVVIVDVIDQNRALVDAPDMVRCQMNFKRLSLTDIKIDIKRVPKKKTLIEAMTAADVKNKWENSSWGRKLIVQKRRASLNDFDRFKIMLAKIKRGGVIRQELAKLKKQTAS	148	21334	5	4
717	854	gi|225463041|ref|XP_002267370.1|	PREDICTED: hypothetical protein [Vitis vinifera]	MPFKRYVEIGRVALVNYGKEYGRLVVIVDVIDQNRALVDAPDMVRCQMNFKRLSLTDIKIDIKRVPKKKTLIEAMNAADVKNKWENSSWGRKLIVQKRRASLNDFDRFKIMLAKIKRGGVIRQELAKLKKQTAS	148	21375	5	4
717	854	gi|255575865|ref|XP_002528830.1|	60S ribosomal protein L14, putative [Ricinus communis] >gi|223531742|gb|EEF33564.1| 60S ribosomal protein L14, putative [Ricinus communis]	MPFKRYVEIGRVALVNYGKDYGKLVVIVDVIDQNRALVDAPDMVRSQMNFKRLQLTDIKIDINRVPKKKNLIEAMEKADVKNKWESSSWGRKLIVQKRRAALNDFDRFKLMLAKIKRGGLIRQELAKLKKETAA	148	21632	5	4
717	854	gi|255627457|gb|ACU14073.1|	unknown [Glycine max]	MPFKRYVEIGRVAQINYGKEYGRLVVIVDVIDQNRALVDAPDMVRSQVNFKRLSLTDIKIDIKRVPKKKDLVKAMEDADVKNKWEKSSWGRKLIVRKRRASLNDFDRFKIMLAKIKRAAVVRQELAKLKKSA	148	21792	5	4
717	854	gi|255627611|gb|ACU14150.1|	unknown [Glycine max]	MPFKRYVEIGRVAQINYGKEYGRLVVIVDVIDQNRALVDAPDMVRSQVNFKRLSLTDIKIDIKRVPKKKDLVKAMEDADVKTKWEKSSWGRKLIVRKRRASLNDFDRFKIMLAKIKKAAVVRQELAKLRKSA	148	21779	5	4
717	854	gi|296083677|emb|CBI23666.3|	unnamed protein product [Vitis vinifera]	MEFFNLYNLHGHKVLNQIRLISGFNSPKKAQRASKPNTIVTQRSRTQIGPKRTIKKPRKTLSPVSPSTPLASSIFPLPAVSRALANMPFKRYVEVGRVALVNYGKDYGRLVVIVDVIDQNRALVDAPDMVRCQMNFKRLSLTDIKIDIKRVPKKKTLIEAMTAADVKNKWENSSWGRKLIVQKRRASLNDFDRFKIMLAKIKRGGVIRQELAKLKKQTAS	148	33293	5	4
717	854	gi|296084563|emb|CBI25584.3|	unnamed protein product [Vitis vinifera]	MKWVELDLHLIWASRKRPKGFSAVSTFILLFCIVRLSALSHAQAKMPFKRYVEIGRVALVNYGKEYGRLVVIVDVIDQNRALVDAPDMVRCQMNFKRLSLTDIKIDIKRVPKKKTLIEAMNAADVKNKWENSSWGRKLIVQKRRASLNDFDRFKIMLAKIKRGGVIRQELAKLKKQTAS	148	27796	5	4
717	854	gi|76161008|gb|ABA40467.1|	glycoprotein-like protein [Solanum tuberosum]	MPFKRFVEIGRVALVNYGKDYGRLVVIVDVIDQNRALVDAPDMVRSQMNFKRLSLTDIKIDIKRIPKKKTLIAAMEAADVKTKWESSSWGRKLIVQKRRASLNDFDRFKLMLAKIKRAGVVRQELAKLKKEVAA	148	21186	5	4
720	857	gi|192910862|gb|ACF06539.1|	ubiquitin-conjugating enzyme family protein [Elaeis guineensis]	MTIGSGGSSVVVPRNFRLLEELERGEKGIGDGTVSYGMDDGDDIYMRSWTGTIIGPHNSVHEGRIYQLKLFCDKDYPEKPPGVRFHSRINMTCVNHETGVVEPKKFGILANWQREYTMEDILVQLKKEMAAPHNRKLVQPPEGTFF	147	19686	7	7
720	857	gi|296084863|emb|CBI28272.3|	unnamed protein product [Vitis vinifera] >gi|225464852|ref|XP_002271772.1| PREDICTED: hypothetical protein isoform 1 [Vitis vinifera] >gi|147839204|emb|CAN76921.1| hypothetical protein [Vitis vinifera]	MTIGSGGSSVVVPRNFRLLEELERGEKGIGDGTVSYGMDDGDDIYMRSWTGTIIGPHNSVHEGRIYQLKLFCDKDYPEKPPSVRFHSRINMICVNHETGVVEAKKFGMLANWQREFTMEDILTQLKKEMAAPHNRKLVQPPEGTYF	147	19722	7	7
720	857	gi|75755827|gb|ABA26973.1|	TO25-123 [Taraxacum officinale]	ERGEKGIGDGTVSYGMDDGDDIYMRSWTGTIIGPHNSVHEGRIYQLKLFCDKDYPEKPPTVRFHSRI	147	9217	7	7
720	857	gi|75755857|gb|ABA26987.1|	TO38-23 [Taraxacum officinale]	NVVVPRNFRLLEELERGEKGIGDGTVSYGMDDGDDIYMRSWTGTIIGPHNSVHEGRIYQLKLFCDKDYPEKPPTVRFHSRVNMTCVNHETGVVEPKKFGILGNWQREYTMEDILIRLKKEMASPHNRKLVQPPEGTCF	147	19110	7	7
720	857	gi|78191460|gb|ABB29951.1|	ubiquitin-conjugating enzyme family protein-like [Solanum tuberosum] >gi|76160962|gb|ABA40444.1| ubiquitin-conjugating enzyme family protein-like protein [Solanum tuberosum]	MTLGSGGSSVVVPRNFRLLEELERGEKGIGDGTVSYGMDDGDDIYMRSWTGTIIGPHNSVHEGRIYQLKLFCDKDYPEKPPSVRFHSRVNMTCVNHETGVVEPKKFALLSNWQREYTMEDILTQLKKEMASPHNRKLVQPPEGTCF	147	19763	7	7
724	861	gi|284433780|gb|ADB85096.1|	putative glutathione peroxidase [Jatropha curcas]	MASVPFQSLKQFQINPKSCSFSPAMAFCIPSMKTSFGPSKSAFLQHGFSLQLPNFPGFLSKTHSFAVYARAATEKTIHDYTVKDIDGNGVPLSKFKGKVLLIVNVASKCGLTASNYTELSHIYEKYKTQGFEILAFPCNQFGGQEPGSNPEIKQFACTRYKAEFPIFDKVDVNGPNTAPVYQFLKSSAGGFLGDLIKWNFEKFLVDKNGKVVERYPPTTSPFQIEKDIQKLLAA	146	33493	6	1	---		---		---		---		---		---		---
725	862	gi|2196542|gb|AAB61213.1|	glycine-rich protein [Oryza sativa Japonica Group]	MAAPDVEYRCFVGGLAWATDDRSLEAAFSTYGEILESKVRWIPSSLCFFLMRFGGGVRQIWLRKSDYGGGYAVQIINDRETGRSRGFGFVTFSNEQAMRDAIQGMNGKELDGRNITVNEAQSRRSRSGSGGGYCHPGGSGSYRGGGYGGGGGGGGYGQRRESGYRGGGGYGGGRGGGGYGGGYGSRGGGNSDGNWRN	146	22021	7	7	0.264		0.286	*	0.098	*	0.324	*	0.522		0.074	*	0.053	*
733	870	gi|113722137|gb|AAW51923.2|	phenylalanine ammonia-lyase 2 [Rhizophora mangle]	MENITESRHQNGSLDSLCTTKPPRHDPLNWGVAAESLKGSHLDEVKRMVAEYRKHVVKLGGETLTIAQVAAISRGVDSGITVELAESARAGVKASSDWVMDGMTKGTDSYGVTTGFGATSHRRTKQGSALQRELIRFLNAGIFGHGTDSCHTLPHAATRAAMLVRINTLLQGYSGIRFEILEAITKLLNHNITPCLPLRGTITASGDLIPLSYIAGLLTGRPNSKAIGPDGQSLNAGEAFRLAGIESGFFELQPKEGLALVNGTAVGSGLASMVLFEANILAVLAEMLSAIFAEVMNGKPEFTDHLTHKLKHHPGQIEAAAIMEHILDGSSYMKEAKRIHEMDPLQKPKQDRYALRTSPQWLGPQIEVIRFSTKSIEREINSVNDNPLIDVSRNKALHG…	145	91442	3	1
733	870	gi|115325595|gb|ABI93970.1|	putative phenylalanine ammonia-lyase [Rhizophora mangle]	EFGKPEFTDHLTHKLKHHPGQIEAAAIMEHILDGSSYMKEAKRIHEMDPLQKPKQDRYALRTSPQWLGPQIEVIRFSTKSIEREINSVNDNPLIDVSRNKALHGGNFQGTPIGVSMDNARLAIAAIGKLMFAQFSELVNDFYNNGLPSNLHPGQNPSLDYGF	145	21540	3	1
733	870	gi|115325606|gb|ABI93973.1|	putative phenylalanine ammonia-lyase [Rhizophora mangle]	RLPGLFNRAGLFQGHWVPDPLKAFNAWGSIFAWPAIEFMVSFELQPKEGLALVNGTAVGSGLASMVLFEANILAVLAEMLSAIFAEVMNGKPEFTDHLTHKLKHHPGQIEAAAIMEHILDGSSYMKEAKRIHEMDPLQKPKQDRYALRTSPQWLGPQIEVIRFSTKSIEREINSVNDNPLIDVSRNKALHGGNFQGTPIGVSMDNARLAIAAIGKLNVCSVFSVYWGMTSTNQRIAIPILHPGQEFLSHSP	145	31697	3	1
733	870	gi|115325615|gb|ABI93975.1|	putative phenylalanine ammonia-lyase [Rhizophora mangle]	MENITESRHQNGSLDSLCTTKPPRHDPLNWGVAAESLKGSHLDEVKRMVAEYRKHVVKLGGETLTIAQVAAISRGVDSGITVELAESARAGVKASSDWVMDGMTKGTDSYGVTTGFGATSHRRTKQGSALQRELIRFLNAGIFGHGTDSCHTLPHAATRAAMLVRINTLLQGYSGIRFEILEAITKLLNHNITPCLPLRGTITASGDLIPLSYIAGLLTGRPNSKAIGPDGQSLNAGEAFRLAGIESGFFELQPKEGLALVNGTAVGSGLASMVLFEANILAVLAEMLSAIFAEVMNGKPEFTDHLTHKLKHHPGQIEAAAIMEHILDGSSYMKEAKRIHEMDPLQKPKQDRYALRTSPQWLGPQIEVIRFSTKSIEREINSVNDNPLIDVSRNKALHG…	145	71222	3	1
733	870	gi|117067269|gb|ABK32083.1|	phenylalanine ammonia-lyase [Prunus armeniaca]	REINSVNDNPLIDVSRNKALHGGNFQGTPIGVSMDNTRLAIAAIGKLMFAQFSELVNDFYNNGLPSNLSGGRNPNLDYGFKGAEIAMASYCSELQFLANPVTNHVQSAEQHNQDVNSLGLISSRKTAEAVDILKLMSSTFLVALCQAIDLRHLEENLRNTVKNTVSQVAKRTLTTGVNGELHPSRFCEKDLLKVVDREYVFAYIDDPCSATYPLMQKLRQVLVEHALTNGENEKNASTSIFQKTVAFEEELKVLLPKEVDSARAALDSGSAGVPNRITECRSYPLYKFVR	145	37160	3	1
733	870	gi|117939089|dbj|BAF36698.1|	phenylalanine ammonia-lyase [Brassica oleracea]	EHILDGRSYMKLAQKLHEMDPLQKPKQDRYALRTSPQWLGPQVEVIRYATKSIEREINSVNDNPLIDVSRNKAIHGGNFQGTPIGVSMDNTRLAIAAIGKLMFAQFSELVNDYYNNGLPSNLTASRNPSLDYGFKGAEIAMASYCSELQYLANPVTSHVQSA	145	20828	3	1
733	870	gi|119656934|gb|ABL86590.1|	phenylalanine ammonia-lyase [Centaurea jacea]	QWLGPQIEVIRSATKMIEREINSVNDNPLIDVSRNKALHGGNFQGTPIGVSMDNTRLAIAAIGKLMFAQFSELVNDFYNGLPSNLSGGRNPSLDYGSKGGEIAMASYCSELQFLANPVTNHVQSAEQHNQDVNSLGLISARKTAEAVDILKLMSSTYLVALCQSVDLRHLEENMKSTVKNTVSQVAKKVLTMGVNGELHPSRFCEKDLLRVVDREYVFAYIDD	145	28354	3	1
733	870	gi|1220270|emb|CAA34715.1|	unnamed protein product [Petroselinum crispum]	FLNAGIFGNGSDNTLPHSATRAAMLVRINTLLQGYSGIRFEILEAITKFLNQNITPCLPLRGTITASGDLVPLSYIAGLLTGRPNSKAVGPTGVILSPEEAFKLAGVEGGFFELQPKEGLALVNGTAVGSGMASMVLFEANILAVLAEVMSAIFAEVMQGKPEFTDHLTHKLKHHPGQIEAAAIMEHILDGSAYVKAAQKLHEMDPLQKPKQDRYALRTSPQWLGPQIEVIRSSTKMIEREINSVNDNPLIDVSRNKAIHGGNFQGTPIGVSMDNTRLAIAAIGKLMFAQFSELVNDFYNNGLPSNLSGGRNPSLDYGFKGAEIAMASYCSELQFLANPVTNHVQSAEQHNQDVNSLGLISSRKTSEAVEILKLMSTTFLVGLCQAIDLRHLEENLKST…	145	73627	3	1
733	870	gi|122893276|gb|ABM67591.1|	phenylalanin ammonia-lyase [Vitis vinifera]	MDATNCHGSNKVESFCVSDPLNWGMAAETLKGSHLDEVKRMVAEYRKPVVRLGGETLTISQVAAIAGREGDVGVELSETARAGVNASSEWVMESMSKGTDSYGVTTGFGATSHRRTKQGGALQKELIRFLNAGIFGNGTESCHTLPHSATRAAMLVRINTLLQGYSGIRFEILEAITKLLNHNITPCLPLRGTVTASGDLVPLSYIAGLLTGRPNSKAVGPSGEVVNAEEAFKMAGIESGFFELQPKEGLALVNGTAVGSGLASMVLFETNVLAVLSEVLSAIFAEVMQGKPEFTDHLTHKLKHHPGQIEAAAIMEHILDGSSYVKEAKKLHEMDPLQKPKQDRYALRTSPQWLGPHIEVIRASTKSIEREINSVNDNPLIDVSRNKALHGGNFQGTPI…	145	90776	3	1
733	870	gi|125540370|gb|EAY86765.1|	hypothetical protein OsI_08145 [Oryza sativa Indica Group]	MACENGQVAADGINGLCMAAPRADPLNWGKAAEEMSGSHLDEVKRMVAEYRQPLVKIEGASLRIAQVAAVAAAGEARVELDESARERVKASSDWVMNSMMNGTDSYGVTTGFGATSHRRTKEGGALQRELIRFLNAGAFGTGTDGHVLSAEATRAAMLVRINTLLQGYSGIRFEILEAITKLLNANVTPCLPLRGTVTASGDLVPLSYIAGLVTGRENSVAVAPDGSKVNAAEAFKIAGIQGGFFELQPKEGLAMVNGTAVGSGLASTVLFEANILAVLAEVLSAVFCEVMNGKPEYTDHLTHKLKHHPGQIEAAAIMEHILEGSSYMKLAKKLGELDPLMKPKQDRYALRTSPQWLGPQIEVIRAATKSIEREINSVNDNPLIDVSRDKALHGGNFQG…	145	87874	3	1
733	870	gi|125540372|gb|EAY86767.1|	hypothetical protein OsI_08147 [Oryza sativa Indica Group] >gi|158512872|sp|A2X7F7.1|PAL2_ORYSI RecName: Full=Phenylalanine ammonia-lyase	MECENGRVSANGMSGLCVAAPRADPLNWGKATEEMTGSHLDEVKRMVAEYRQPLVKIEGASLRIAQVAAVAAAGEARVELDESARERVKASSDWVMNSMMNGTDSYGVTTGFGATSHRRTKEGGALQRELIRFLNAGAFGTGTDGHVLPAEATRAAMLVRINTLLQGYSGIRFEILEAIAKLLNANVTPCLPLRGTITASGDLVPLSYIAGLVTGRENAVAVAPDGSKVNAAEAFKIAGIQGGFFELQPKEGLAMVNGTAVGSGLASTVLFEANILAILAEVLSAVFCEVMNGKPEYTDHLTHKLKHHPGQIEAAAIMEHILEGSSYMKHAKKLGELDPLMKPKQDRYALRTSPQWLGPQIEVIRAATKSIEREINSVNDNPLIDVSRGKALHGGNFQG…	145	89132	3	1
733	870	gi|129582|sp|P24481.1|PAL1_PETCR	RecName: Full=Phenylalanine ammonia-lyase 1 >gi|1524313|emb|CAA68938.1| PAL1 protein [Petroselinum crispum]	MENGNGATTNGHVNGNGMDFCMKTEDPLYWGIAAEAMTGSHLDEVKKMVAEYRKPVVKLGGETLTISQVAAISARDGSGVTVELSEAARAGVKASSDWVMDSMNKGTDSYGVTTGFGATSHRRTKQGGALQKELIRFLNAGIFGNGSDNTLPHSATRAAMLVRINTLLQGYSGIRFEILEAITKFLNQNITPCLPLRGTITASGDLVPLSYIAGLLTGRPNSKAVGPTGVILSPEEAFKLAGVEGGFFELQPKEGLALVNGTAVGSGMASMVLFEANILAVLAEVMSAIFAEVMQGKPEFTDHLTHKLKHHPGQIEAAAIMEHILDGSAYVKAAQKLHEMDPLQKPKQDRYALRTSPQWLGPQIEVIRSSTKMIEREINSVNDNPLIDVSRNKAIHGGN…	145	90765	3	1
733	870	gi|1345583|emb|CAA53581.1|	phenylalanine ammonium lyase [Vitis vinifera] >gi|1172004|sp|P45735.1|PALY_VITVI RecName: Full=Phenylalanine ammonia-lyase	TDHLTHKLKHHPGQIEAAAIMEHILDGSSYVKEAKKLHEMDPLQKPKQDRYALRTSPQWLGPHIEVIRASTKSIEREINSVNDNPLIDVSRNKALHGGNFQGTPIGVSMDNTRLAIAAIGKLMFAQFSELVNDFYNNGLPSNLSGSRNPSLDYGFKGAEIAMASYCSELQFLANPVTNHVESAEQHNQDVNSLGLISSRKTAEAVDILKLMSTTYLVALCQAIDLRHLEENLKSTVKKTVSHVAKKTLTIGANGELHPSRFCEKDLLKVVDREHVFAYIDDPCSATYPLMQKVRQVLVEHALNNGESEKNGSTSIFQKIGAFEEELKAVLPKEVESARDGVESGNPSIPNRIKECRSYPLYKFVREELGTGLLTGEKVRSPGEDFDKVFTAMCEGKIID…	145	55873	3	1
733	870	gi|147834991|emb|CAN61378.1|	hypothetical protein [Vitis vinifera]	MAAETLKGSHLDEVKRMVAEYRKPVVQLGGETLTISQVAAIAGREGDVSVELSETARAGVKASSDWVMESMKKGIDSYGVTTGFGATSHRRTKQGGALQKELIRVLNAGIFGNGRESCHTLPHSATRAAMLVRINSLLQGYSGIRFEILEAITKLLNHNITPCLPLRGTVTASGDLVPLSYIAGLLTGRPNSKAVGPSGEVVNAEEAFKMAGIESGFFELQPKEGFALVNGTAVGSGLASMVLFETNVLAVLSEVLSAVFAEVMQGKPEFTDHLTHKLKHHPGQIEAAAIMEHILDGISYVKEAKKLHEMDPLQKPKQDRYALRTSPQWLGPHIEVIRASTKSIEREINSVNDNPLIDVSRNKALHGGNFQGTPIGVSMDNTRLAIAAIGKLMFAQFSE…	145	88148	3	1
733	870	gi|147839022|emb|CAN77065.1|	hypothetical protein [Vitis vinifera]	MNCHGSKKVESFVVSDPLNWGVAAEALKGSHLDEVKRMVAEYRKPVVRLGGETLTISQVAAIAGREXDVSVELSETARAGVNASSEWVMESMSKGTDSYGVTTGFGATSHRRTKQGGALQKELIRFLNAGIFGNGTESCHTLPHSATRAAMLVRINTLLQGYSGIRFEILEAITKLLNHNITPCLPLRGTVTASGDLVPLSYIXGLLTGRPNSKAVGPSGEVVNAEEAFKMAGIESGFFELQPKEGLALVNGTAVGSGLASMVLFETNVLAVLSEVLSAIFAEVMQGKPEFTDHLTHKLKHHPGQIEAAAIMEHILDGSSYVKEAKKLHEMDPLQKPKQDRYALRTSPQWLGPQIEVIRASTKSIEREINSVNDNPLIDVSRNKALHGGNFQGTPIGVS…	145	90502	3	1
733	870	gi|151564289|gb|ABS17595.1|	putative phenylalanine ammonia-lyase [Humulus lupulus]	FFELQPKEGLALVNGTAAGSGLASMVLFEANILAVLAEVLSAIFAEVMQGKPDFTDHLTHKLKHHPGQIEAAAIMEYILDGSSYIKEAKKLHEMDPLQKPKQDRYALRTSPQWLGPQIEVIRFSTKSIEREINSVNDNPLIDVSRNKAFHGGNFQGTPIGVSMDNTRLAIAAIGKLLFAQFSELVNDIYSNGLPSNLSGGRNPSLDYGFKGAEIAMASYYSELQYLCYSVTSHVHSAEQHNQD	145	31024	3	1
733	870	gi|156448025|gb|ABU63711.1|	phenylalanine ammonia lyase [Garcinia mangostana]	VIFAEVMNGKAEFTDHLTHKLKHHPGQIEAAAIMEHILDGSSYMKEAKRLHEMDPLQKPKQDRYALRTSPQWLGPPIEVIRFATKMIEREINSVNDNPLIDVSRNKXLHGGNFQGTPIGMSMDNARLAIAAIGKLMFAQFSELVNDYYNNGLPSNL	145	20914	3	1
733	870	gi|158906257|gb|ABW82706.1|	putative phenylalanine ammonia lyase [Liriodendron tulipifera]	QWLGPQIEVIRSSTKMIEREINSVNDNPLIDVSRNKALHGGNFQGTPIGVSMDNTRLAIAAIGKLMFAQFSELVNDFYNNGLPSNLSGGRNPSLDYGFKGAEITMAPYCSELQFLANPVTNHVQSAEQHNQDVNSLGLISSRKTAESIEILKLMSSTYLVALCQAIDLRHLEENLKSAVKNAVSHVVKKVLTTGPNGSLHPSRFCEKDLLRIVDREYVFAYIDDPC	145	28812	3	1
733	870	gi|159885624|dbj|BAF93189.1|	putative phenylalanine ammonia-lyase [Hordeum vulgare]	DLVPLSYIAGLVTGRPNSMATAPDGTKVNAAEAFKIAGIQHGFFELQPKEGLAMVNGTAVGSGLASMVLFEANILSLLAEVLSAVFCEVMNGKPEYTDHLTHKLKHHPGQIEAAAIMEHILEGSSYMMLAKKLGELDPLMKPKQDRYALRTSPQWLGPQIEVIRAATKSIEREINSVNDNPLIDVSRGKAIHGGNFQGTPIGVSMDNTRLAIAAIGKLMFAQFSELVNDLYNNGLPSNLSGGRNPSLDYGFKGAEIAMASYCSELQFLGNPVTNHVQSAEQHNQDVNSLGLISSRKTAEAIDILKLMSSTFLVALCQAIDLRHLEENVKNAVKSCVKTVARKTLSTNSNGHLHSARFCEKDLLLTIDREAVFAYADDPCSANYPLMQKMRAVLVEHALA…	145	65854	3	1
733	870	gi|166715386|gb|ABY88405.1|	phenylalanine ammonia-lyase [Arabidopsis thaliana] >gi|166715378|gb|ABY88401.1| phenylalanine ammonia-lyase [Arabidopsis thaliana]	PEFTDHLTHRLKHHPGQIEAAAIMEHILDGSSYMKLAQKLHEMDPLQKPKQDRYALRTSPQWLGPQIEVIRYATKSIEREINSVNDNPLIDVSRNKAIHGGNFQGTPIGVSMDNTRLAIAAIGKLMFAQFSELVNDFYNNGLPSNLTASRNPSLDYGFKGAEIAMASYCSELQYLANPVTSHVQSAEQHNQDV	145	24642	3	1
733	870	gi|166715536|gb|ABY88480.1|	phenylalanine ammonia-lyase [Arabidopsis thaliana] >gi|166715520|gb|ABY88472.1| phenylalanine ammonia-lyase [Arabidopsis thaliana] >gi|166715470|gb|ABY88447.1| phenylalanine ammonia-lyase [Arabidopsis thaliana] >gi|166715362|gb|ABY88393.1| phenylala	PEFTDHLTHRLKHHPGQIEAAAIMEHILDGSSYMKLAQKLHEMDPLQKPKQDRYALRTSPQWLGPQIEVIRYATKSIEREINSVNDNPLIDVSRNKAIHGGNFQGTPIGVSMDNTRLAIAAIGKLMFAQFSELVNDFYNNGLPSNLTASRNPSLDYGFKGAEIAMASYCSELQYLANPVTSHVQSAEQHNQDVNS	145	24843	3	1
733	870	gi|166798289|gb|ABY89690.1|	phenylalanine ammonialyase 1 protein [Brassica rapa subsp. campestris]	MEVNGLSHGGEVDAMLCGGEIKKNATVVGADPLNWGAAAEQMKGSHLDEVKRMVKEFRRPVVNLGGETLTIGQVAAISTLGNGVKVELSETARAGVKASSDWVMESMGKGTDSYGVTTGFGATSHRRTKNGVALQKELIRFLNAGIFGSTKETSHTLPHSATRAAMLVRINTLLQGYSGIRFEILEAITSFLNNNITPSLPLRGTITASGDLVPLSYIAGLLTGRPNSKATGPNGEALNAEEAFKMAGVTSGFFDLQPKEGLALVNGTAVGSGMASMVLFEANVLSVLAEVLSAVFAEVMSGKPEFTDHLTHRLKHHPGQIEAAAIMEHILDGSSYMKLAQKLHEMDPLQKPKQDRYALRTSPQWLGPQIEVIRYATKSIEREINSVNDNPLIDVSRNK…	145	91480	3	1
733	870	gi|166798291|gb|ABY89691.1|	phenylalanine ammonialyase 2 protein [Brassica rapa subsp. campestris]	MEVNGLSHGGEVDAMLCGGEIKKNATVVGADPLNWGAAAEQMKGSHLDEVKRMVKEFRRPVVNLGGETLTIGQVAAISTLGNGVKVELSETARAGVKASSDWVMESMGKGTDSYGVTTGFGATSHRRTKNGVALQKELIRFLNAGIFGSTKETSHTLPHSATRAAMLVRINTLLQGYSGIRFEILEAITSFFNNNITPSLPLRGTITASGDLVPLSYIAGLLTGRPNSKATGPNGEALNAEEAFKMAGVTSGFFDLQPKEGLALVNGTAVGSGMASMVLFEANVLSVLAEVLSAVFAEVMSGKPEFTDHLTHRLKHHPGQIEAAAIMEHILDGSSYMKLAQKLHEMDPLQKPKQDRYALRTSPQWLGPQIEVIRYATKSIEREINSVNDNPLIDVSRNK…	145	91556	3	1
733	870	gi|169642799|emb|CAL91037.1|	phenylalanine ammonia-lyase 1 [Cynara scolymus]	DPLNWGIAAESLKGSHLDEIKRMVAEFRRPIVRLGGETLTVSQVAAIAATDDGGVKVELSESSRAGVKASSDWVMESMGKGTDSYGVTTGFGATSHRRTKEGGALQKELIRRFLNAGIFGNGTESSHTLPHSATRAAMLVRINTLLQGYSGIRFEILEAITKFLNHNVTPFLPLRGTITASGDLVPLSYIAGLLTGRSNSKAIGPTGEVLNAEKAFAEAGVEGGFFELQPKEGLALVNGTAVGSGMASMVLFEANVLALLSEVLSAMFAEVMQGKPEFTDHLTHKLKHHPGQIEAAAIMEYILDGSDYVKAAQKVHEMDPLQKPKQDRYALRTSPQWLGPQIEVIRSATKMIEREINSVNDNPLIDVSRNKAIHGGNFQGTPIGVSMDNTRLAIAAIGK…	145	87354	3	1
733	870	gi|169642807|emb|CAL91171.1|	phenylalanine ammonia-lyase 2 [Cynara scolymus]	VKASSDWVMESMGKGTDSYGVTTGFGATSRRRTKEGGALQTELIRRFLNAGIFGSGTESCHTLPHSATRAAMLVRINTLLQGYSGIRFEILEAITKFLNTNVTPCLPLRGTITASGDLVPLSYIAGLLTGRPNSKAVGPNGDLLNAEKAFSLAGVSGGFFDLQPKEGLALVNGTAVGSGMASMVLFEANVLALLSEVLSAIFAEVMQGKPEFTDHLTHKLKHHPGQIEAAAIMEYILDGSDYVKAAQMVHEMDPLQKPKQDRYALRTSPQWLGPQIEVIRSSTKMIEREINSVNDNPLIDVSRNKALHGGNFQGTPIGVSMDNTRLAIAAIGKLMFAQFSELVNDFYNNGLPSNLSGGRNPSLDYGFKGAEIA	145	45583	3	1
733	870	gi|175050408|gb|ABP96954.2|	phenylalanine ammonia-lyase [Phyllostachys edulis]	MECENGHVAASGNGLCMAKPPRADPLNWGKAAEELLGSHLDAVKRMVEEYRRPVVRIEGASLTIAQVAAVAAAGEARVELDESSRGRVKESSDWVINSMMNGTDSYGVTTGFGATSHRRTEEGGALQRELIRFLNAGAFGTGDDGHVLPAAATRAAMLVRINTLLQGYSGIRFEILETIATLLNANVTPCLPLRGTITASGDLVPLSYIAGLVTGRPNSVAVAPDGRKVNAAEAFKIAGILNGFFELQPKEGLAMVNGTAVGSGLASMVLFEANILGVLAEVLSAVFCEVMNGKPEYTDHLTHKLKHHPGQIEAAAIMEHILEGSSYMKLAKKLGELDPLMKPKQDRYALRTSPQWLGPQIEVIRAATKSIEREINSVNDNPLIDVSRGKALHGGNFQG…	145	88717	3	1
733	870	gi|18072847|emb|CAC81822.1|	phenylalanine ammonia-lyase [Beta vulgaris]	EWVMERMNKGTDSYGVTTGFGATSHRRTKQGGALQKELIRFLNAGVFGNGTESSHTLPHTATRAAMLVRINTLLQGYSGIRFEILEAITGLLNNNITPCLPLRGTITASGDLVPLSYIAGLLTGRPNSKAVGPNGEVLNAEQAFKAAQISSGFFELQPKEGLALVNGTAVGSGMASIVLFETNILAVLAEVISAVFAEVMNGKPEFTDHLTHKLKHHPGQIEAAAIMEHILDGSSYMKAAKALHELDPLQKPKQDRYALRTSPQWLGPQIEVIRFATKSIEREINSVNDNPLIDVSRNKALHGGNFQGTPIGVSMDNARLAIAAIGKLLFAQFSELVNDYYNNGLPSNLTASRDPSLDYGFKGAEIAMASYCSELQFLGNPVTNHVQSAEQHNQDV	145	48300	3	1
733	870	gi|18129088|emb|CAD20548.1|	unnamed protein product [Zostera marina]	SITRVRWRPSSPKKSKQDRYALRTSPQWLGPQVEVIRASTKSIEREINSVNDNPLIDVSRNKALHGGNFQGTPIGVSMDNTRLAIAAIGKLMFAQFSELVNDFYNNGLPSNLSGGRNPSLDYGFKGGEIAMASYCSELQFLANPVTNHVQSAEQHNQDVNSLGLISARKTAESIEILKLMTSTFLVGICQAIDLRHMEENLKASVKNTVSQVAKRVLTMTANGELHPSRFCEKDLLKVVDREYVFSYIDDPCSATYPLMQKLRSVLVDHALNNGDKEKDEAMSIFQKIAVFEEELIAVFPKEV	145	40042	3	1
733	870	gi|187468964|dbj|BAG31930.1|	phenylalanine ammonia-lyase [Daucus carota]	MAYTNGHHENGNGVDLCMKKEDPLSWGVAAEALTGSHLEEVKRMVAEYRKPVVKLGGETLTISQVAAISARDDSGVKVELSEAARAGVKASSDWVMESMNKGTDSYGVTTGFGATSHRRTKQGGALQKELIRFLNAGIFGSGAEAGNNTLPHSATRAAMLVRINTLLQGYSGIRFEILEAITKFLNHNITPCLPLRGTITASGDLVPLSYIAGLLTGRPNSKAVGPTGVTLSPEEAFKLAGVEGGFFELQPKEGLALVNGTAVGSGMASMVLFEANILAVLAEVMSAIFAEVMQGKPEFTDHLTHKLKHHPGQIEAAAIMEHILDGSAYVKAAQKLHEMDPLQKPKQDRYALRTSPQWLGPQIEVIRSSTKMIEREINSVNDNPLIDVSRNKAIHGGNF…	145	91034	3	1
733	870	gi|188037480|gb|ABN79671.2|	phenylalanine ammonia-lyase [Rudbeckia hirta]	MENGNHVNGNHVNGNGAAAEFCIKDPLNWGAAAEALTGSHLDEVKKMVAEFRKPVVKLGGETLTVSQVAGIAAAGGGGGGTVTVELSEAARAGVKASSDWVMESMNKGTDSYGVTTGFGATSHRRTKNGGALQKELIRFLNAGIFGNGTESSHTLPHSATRAAMLVRINTLLQGYSGIRFEILEAITKFLNNNITPCLPLRGTITASGDLVPLSYIAGLLTGRPNSKAMGPTGEILNAETAFAQAGVKGGFFELQPKEGLALVNGTAVGSGMASMVLFEANVLALLSEVLSAIFAEVMQGKPEFTDHLTHKLKHHPGQIEAAAIMEYILDGSDYVKAAQKVHEMDPLQKPKQDRYALRTSPQWLGPQIEVIRSATKMIEREINSVNDNPLIDVSRNKAL…	145	90701	3	1
733	870	gi|195931987|gb|ACG56647.1|	phenylalanine ammonia lyase [Musa acuminata] >gi|195931991|gb|ACG56649.1| phenylalanine ammonia lyase [Musa acuminata]	MEFAPKAQVVENGEAFCLKADPLNWIKAAESLTGSHLDEVKRMVEEFRKPLVRLEGATLTISQVAAVAAARSPVRVELSEEARDGVRASSEWVMESMNKGTDSYGVTTGFGATSHRRTKQGGALQKELIRFLNAGIFGSGTESAHTLPTPAARAAMLVRVNTLLQGYSGIRFEILEAMASLLNSGITPCLPLRGTITASGDLVPLSYIAGVLTGRSNAKAVRPGGEAVDAAEAFRRSGIPHGFFELQPKEGLALVNGTAVGSGLASVVLYEANVLAVLAEVLSAVFCEVMQGKPEFTDHLTHKLKHHPGQIEAAAIMEHVLEGSSYMKMAKKLHEQDPLQKPKQDRYALRTSPQWLGPQIEVIRSSTKSIEREINSVNDNPLIDVSRNKALHGGNFQGT…	145	90244	3	1
733	870	gi|195931989|gb|ACG56648.1|	phenylalanine ammonia lyase [Musa acuminata AAA Group]	MEFAPKAQVVENGEAFCLKADPLNWIKAAESLTGSHLDEVKRMVEEFRKPLVRLEGATLTISQVAAVAAARSPVRVELSEEARDGVRASSEWVMESMNKGTDSYGVTTGFGATSHRRTKQGGALQKELIRFLNAGIFGSGTESAHTLPTPAARAAMLVRVNTLLQGYSGIRFEILEAMASLLNSGITPCLPLRGTITASGDLVPLSYIAGVLTGRPNAKAVRPGGEAVDAAEAFRRSGIPHGFFELQPKEGLALVNGTAVGSGLASVVLYEANVLAVLAEVLSAVFCEVMQGKPEFTDHLTHKLKHPPGQIEAAAIMEHVLEGSSYMKMAKKLHEQDPLQKPKQDRYALRTSPQWLGPQIEVIRSSTKSIEREINSVNDNPLIDVSRNKALHGGNFQGT…	145	90141	3	1
733	870	gi|196968511|gb|ACG80828.1|	phenylalanine ammonia lyase [Musa acuminata AAA Group]	RFLNAGIFGSGSDQSGHTLPPPATRAAMLVRINTLLQGYSGIRFEILEAITSLLNSNISPCLPLRGTITASGDLVPLSYIAGILTGRPDSKAISPAGEAIDAAEAFRLAGIPHGFFELQPKEGLALVNGTAVGSGLASMVLYEANILAVLAEVLSAVFCEVMQGKPEFTDHLTHKLKHHPGQIEAAAIMEHVLEGSSYMKMAKKLHEQDPLQKPKQDRYALRTSPQWLGPQIEVIRSSTKSIEREINSVNDNPLIDVSRNKALHGGNFQGTPIGVSMDNTRLAIAAIGKLMFAQFSELVNDFYNNGLPSNLSGGRNPSLDYGFKGAEIAMAAYCSELQFLANPVTNHVQSAEQHNQDVNSLGLISSRKTAEAVDILKLMSTTYLVALCQAIDLRHLEEN…	145	73714	3	1
733	870	gi|196968513|gb|ACG80829.1|	phenylalanine ammonia lyase [Musa acuminata AAA Group]	RFLNAGIFGSGTESAHTLPTPAARAAMLVRVNTLLQGYSGIRFEILEAMAGLLNCGITPCLPLRGTITASGDLVPLSYIAGLLTGRPNAKAVRPGGEAINAAEAFRRAGIPHGFFELQPKEGLALVNGTAVGSGLASMVLFDANVLAVLAEVLSAVFCEVMQGKPEFTDHLTHKLKHHPGQIEAAAIMEHVLEGSSYMKMAKKLHEQDPLQKPKQDRYALRTSPQWLGPQIEVIRSSTKSIEREINSVNDNPLIDVSRNKALHGGNFQGTPIGVSMDNTRLAIAAIGKLMFAQFSELVNDFYNNGLPSNLSGGRNPSLDYGFKGAEIAMAAYCSELQFLANPVTNHVQSAEQHNQDVNSLGLISSRKTAKAVDILKLMSTTYLVALCQAIDLRHLEENL…	145	73747	3	1
733	870	gi|2052090|emb|CAA89005.1|	phenylalanine ammonia-lyase [Hordeum vulgare subsp. vulgare]	GIQHGFFELQPKEGLAMVNGTAVGSGLASMVLFEANILSLLAEVLSAVFCEVMNGKPEYTDHLTHKLKHHPGQIEAAAIMEHILEGSSYMILAKKLGELDPLMKPKQDRYALRTSPQWLGPQIEVIRAATKSIEREINSVNDNPLIDVSRGKAIHGGNFQGTPIGVSMDNTRLAIAAIGKLMFAQFSELVNDFYNNGLPSNLSGGRNPSLDYGFKGAEIAMASYCSELQFLGNPVTNHVQSAEQHNQDVNSLGLISSRKTAEAIDILKLMSSTFLVALCQAIDLRHLEENVKNAVKSCVKTVARKTLSTDNNGHLHKARFCEKDLLLTIDREAVFAYADDPCSVNYPLMQKMRAVLVEHALANGEAEHDVETSVFAKLATFEQELRAVLPTEVEAARSA…	145	61234	3	1
733	870	gi|2052094|emb|CAA89007.1|	phenylalanine ammonia-lyase [Hordeum vulgare subsp. vulgare]	MECENAHVAANGDGLCVAQPARADPLNWGKAAEELSGSHLDAVKRMVEEYRKPVVTMEGASLTIAMVAAVAAGNDTRVELDESARGRVKESSDWVMNSMMNGTDSYGVTTGFGATSHRRTKEGGALQRELIRFLNAGAFGTGTDGHVLPAATTRAAMLVRVNTLLQGYSGIRFEILETIATLLNANVTPCLPLRGTITASGDLVPLSYIAGLVTGRPNSVATAPDGTKVNAAEAFKIAGIQHGFFELQPKEGLAMVNGTAVGSGLASMVLFEANVLSLLAEVLSAVFCEVMNGKPEYTDHLTHKLKHHPGQIEAAAIMEHILEGSSYMMLAKKLGELDPLMKPKQDRYALRTSPQWLGPQIEVIRAATKSIEREINSVNDNPLIDVSRGKAIHGGNFQG…	145	66979	3	1
733	870	gi|219795960|emb|CAW38448.1|	unnamed protein product [Bambusa oldhamii] >gi|38569936|gb|AAR24505.1| phenylalanine ammonia-lyase [Bambusa oldhamii] >gi|257635058|emb|CBC83350.1| unnamed protein product [Bambusa oldhamii] >gi|257294140|emb|CBC04320.1| unnamed protein product [Bam	MPREDGHVAANGNGLCMAAPRADPLNWGKAAEELMGSHLDEVKRMVAEYRQPVVKIEGASLRIAQVAAVAVAGDAKVELDESARERVKASSDWVMNSMMNGTDSYGVTTGFGATSHRRTKEGGALQRELIRFLNAGAFGTGCDGHVLPAEATRAAMLVRINTLLQGYSGIRFEILEAITKLLNANVTPCLPLRGTVTASGDLVPLSYIAGLVTGRENSVAVAPDGRKVNAAEAFKIAGIQGGFFELQPKEGLAMVNGTAVGSGLASTVLFEANILAILAEVLSAVFCEVMNGKPEYTDHLTHKLKHHPGQIEAAAIMEHILEGSSYMKLAKKLGDLDPLMKPKQDRYALRTSPQWLGPQIEVIRAATKSIEREINSVNDNPLIDVSRNKALHGGNFQGT…	145	88838	3	1
733	870	gi|219796010|emb|CAW38473.1|	unnamed protein product [Citrus clementina x Citrus reticulata] >gi|219990093|emb|CAW82489.1| unnamed protein product [Citrus clementina x Citrus reticulata] >gi|257635108|emb|CBC83399.1| unnamed protein product [Citrus clementina x Citrus reticulat	MDRGAVIENGHQNGCLEGLCKDNNYSSGDALNWGVMAETLKGSHLEEVKRMVAEYRKPVVNLGGETLTVAQVAAIATAGDVNAQVKVELSESAREGVKASSDWVMDSMNKGTDSYGVTTGFGATSHRRTQNGGALQKELIKFLNAGIFGNGTKSSHTLPHSATRAAMLVRVNTLLQGYSGIRFEILDAITKLLNHSITPCLPLRGTITASGDLVPLSYIAGLLTGRPNSKATGPNGEIIDAQEASKQAGFGFFELQPKEGLALVNGTAVGSGLASMVLFDANNLALLSEILSAIFAEVMQGKPEFTDHLTHKLKHHPGQIEAAAIMEHILDGSSYVKAAKKLHEIDPLQKPKQDRYALRTSPQWLGPQIEVIRFATKSIEREINSVNDNPLIDVSRNKA…	145	92392	3	1
733	870	gi|219796054|emb|CAW38495.1|	unnamed protein product [Petroselinum crispum] >gi|219990137|emb|CAW82511.1| unnamed protein product [Petroselinum crispum] >gi|257294234|emb|CBC04367.1| unnamed protein product [Petroselinum crispum] >gi|257314334|emb|CBC40487.1| unnamed protein pr	MAYVNGTTNGHANGNGLDLCMKKEDPLNWGVAAEALTGSHLDEVKRMVAEYRKPVVKLEGETLTISQVAAISARDDSGVKVELSEEARAGVKASSDWVMDSMNKGTDSYGVTTGFGATSHRRTKQGGALQKELIRFLNAGIFGSGAEAGNNTLPHSATRAAMLVRINTLLQGYSGIRFEILEAITKFLNHNITPCLPLRGTITASGDLVPLSYIAGLLTGRPNSKAVGPTGVTLSPEEAFKLAGVEGGFFELQPKEGLALVNGTAVGSGMASMVLFEANILAVLAEVMSAIFAEVMQGKPEFTDHLTHKLKHHPGQIEAAAIMEHILDGSAYVKAAQKLHEMDPLQKPKQDRYALRTSPQWLGPQIEVIRSSTKMIEREINSVNDNPLIDVSRNKAIHG…	145	91406	3	1
733	870	gi|219800853|emb|CAW60865.1|	unnamed protein product [Arabidopsis thaliana] >gi|15028193|gb|AAK76593.1| putative phenylalanine ammonia lyase PAL1 [Arabidopsis thaliana] >gi|19310727|gb|AAL85094.1| putative phenylalanine ammonia lyase PAL1 [Arabidopsis thaliana] >gi|257310498|em	MEINGAHKSNGGGVDAMLCGGDIKTKNMVINAEDPLNWGAAAEQMKGSHLDEVKRMVAEFRKPVVNLGGETLTIGQVAAISTIGNSVKVELSETARAGVNASSDWVMESMNKGTDSYGVTTGFGATSHRRTKNGVALQKELIRFLNAGIFGSTKETSHTLPHSATRAAMLVRINTLLQGFSGIRFEILEAITSFLNNNITPSLPLRGTITASGDLVPLSYIAGLLTGRPNSKATGPNGEALTAEEAFKLAGISSGFFDLQPKEGLALVNGTAVGSGMASMVLFETNVLSVLAEILSAVFAEVMSGKPEFTDHLTHRLKHHPGQIEAAAIMEHILDGSSYMKLAQKLHEMDPLQKPKQDRYALRTSPQWLGPQIEVIRYATKSIEREINSVNDNPLIDVS…	145	91662	3	1
733	870	gi|219800885|emb|CAW60881.1|	unnamed protein product [Oryza sativa Japonica Group] >gi|116310306|emb|CAH67323.1| OSIGBa0102I15.3 [Oryza sativa (indica cultivar-group)] >gi|113564897|dbj|BAF15240.1| Os04g0518400 [Oryza sativa Japonica Group] >gi|32487855|emb|CAE05623.1| OSJNBb00	MECENGHVAAAANGSSLCVAKPRADPLNWGKAAEELSGSHLDAVKRMVEEYRRPVVTIEGASLTIAQVAAVASAGAARVELDESARGRVKASSDWVMNSMMNGTDSYGVTTGFGATSHRRTKEGGALQRELIRFLNAGAFGNGDDGHVLPAAATRAAMLVRINTLLQGYSGIRFEILETIATLLNANVTPCLPLRGTITASGDLVPLSYIAGLVTGRPNSVAVTPDGRKVDAAEAFKIAGIQHGFFELQPKEGLAMVNGTAVGSGLASMVLFEANVLGVLAEVLSAVFCEVMNGKPEYTDHLTHKLKHHPGQIEAAAIMEHILEGSSYMMLAKKLGELDPLMKPKQDRYALRTSPQWLGPQIEVIRAATKSIEREINSVNDNPLIDVSRGKALHGGNFQ…	145	87612	3	1
733	870	gi|219801011|emb|CAW60944.1|	unnamed protein product [Daucus carota] >gi|219796014|emb|CAW38475.1| unnamed protein product [Daucus carota] >gi|219990097|emb|CAW82491.1| unnamed protein product [Daucus carota] >gi|2618590|dbj|BAA23367.1| phenylalanine ammonia-lyase [Daucus carot	MDCENKNVVLGNGLCMQKDPLNWGMAAEALTGSHLDEVKRMVAEFRKPMVQLGGETLTVSQVAAIAAGSVKVELAESARAGVKASSDWVMESMNKGTDSYGVTTGFGATSHRRTKQGGALQKELIRFLNAGIFGSGNDSSNILPHSATRAAMLVRINTLLQGYSGIRFEILEAITKFLNQNITPCLPLRGTITASGDLVPLSYIAGLLTGRPNSKAVGPTGENLTAAEAFKLAGVDGGFFELQPKEGLALVNGTAVGSGMASMVLFETNILAVLAEVMSAIFAEVMQGKPEFTDHLTHKLKHHPGQIEAAAIMEHILDGSSYVKAAEKQHEMDPLQKPKQDRYALRTSPQWLGPQIEVIRSSTKMIEREINSVNDNPLIDVSRNKAIHGGNFQGTPIGV…	145	90086	3	1
733	870	gi|219801043|emb|CAW60960.1|	unnamed protein product [Petroselinum crispum] >gi|257294226|emb|CBC04363.1| unnamed protein product [Petroselinum crispum] >gi|257314326|emb|CBC40479.1| unnamed protein product [Petroselinum crispum] >gi|534893|emb|CAA57056.1| phenylalanine ammonia	MENGNGAITNGHVNGNGMDFCMKTEDPLYWGIAAEAMTGSHLDEVKKMVAEYRKPVVKLGGETLTISQVAAISARDGSGVTVELSEAARAGVKASSDWVMDSMNKGTDSYGVTTGFGATSHRRTKQGGALQKELIRFLNAGIFGNGSDNTLPHSATRAAMLVRINTLLQGYSGIRFEILEAITKFLNQNITPCLPLRGTITASGDLVPLSYIAGLLTGRPNSKAVGPTGVILSPEEAFKLAGVEGGFFELQPKEGLALVNGTAVGSGMASMVLFEANILAVLAEVMSAIFAEVMQGKPEFTDHLTHKLKHHPGQIEAAAIMEHILDGSAYVKAAQKLHEMDPLQKPKQDRYALRTSPQWLGPQIEVIRSSTKMIEREINSVNDNPLIDVSRNKAIHGGN…	145	90900	3	1
733	870	gi|219801063|emb|CAW60970.1|	unnamed protein product [Bromheadia finlaysoniana] >gi|257314346|emb|CBC40499.1| unnamed protein product [Bromheadia finlaysoniana] >gi|1491619|emb|CAA68256.1| phenylalanine ammonia-lyase [Bromheadia finlaysoniana] >gi|3024359|sp|Q42609.1|PALY_BROFI	MEVSKENGLCLQGRDPLNWGAAAAELQGSHLDEVKKMVEEFRRPVVKLEGVKLKISQVAAVAFGGGASAVELAESARAGVKASSDWVLESVDKGTDSYGVTTGFGATSHRRTKQGGALQKELIKFLNAGIFGSGNSNTLPSAATRAAMLVRINTLLQGYSGIRFEILKAIATLLNKNITPCLPLRGTITASGDLVPLSYLAGILTGRPNSKARTPNGSTVDATTAFRLAGISSGFFDLQPKEGLALVNGTAVGSGVASIVLFETNILAVMAELLSALFCEVMQGKPEFTDHLTHKLKHHPGQIEAAAVMEHILEGSSYMKMAKKLHEMDPLQKPKQDRYALRTSPQWLGPQIEVIRAATKSIEREINSVNDNPLIDVSRNKALHGGNFQGTPIGVSMDN…	145	91207	3	1
733	870	gi|219966693|emb|CAW82531.1|	unnamed protein product [Triticum aestivum] >gi|219801091|emb|CAW60984.1| unnamed protein product [Triticum aestivum] >gi|257635192|emb|CBC83484.1| unnamed protein product [Triticum aestivum] >gi|1483610|emb|CAA68036.1| phenylalanine ammonia-lyase [	MACAWRSRSRADPLNWGKAAEELSGSHLEAVKRMVEEYRKPVVTMEGATTIAMVAAVAAGSDTRVELDESARGRVKESSDWVMNSMMNGTDSYGVTTGFGATSHRRTKEGGALQRELIRFLNAGAFGTGTDGHVLPAAATRAAMLVRVNTLLQGYSGIRFEILETIATLLNANVTPCLPLRGTITASGDLVPLSYIAGLVTGRPNSMATAPDGSKVNAAEAFKIAGIQHGFFELQPKEGLAMVNGTAVGSGLASMVLFEANVLSLLAEVLSGVFCEVMNGKPEFTDHLTHKLKHHPGQIEAAAIMEHILEGSSYMMLAKKLGELDPLMKPKQDRYALRTSPQWLGPQIEVIRAATKSIEREINSVNDNPLIDVSRGKAIHGGNFQGTPIGVSMDNTRLA…	145	87164	3	1
733	870	gi|219990021|emb|CAW82453.1|	unnamed protein product [Huperzia lucidula] >gi|257732506|emb|CBC83327.1| unnamed protein product [Huperzia lucidula] >gi|257294118|emb|CBC04309.1| unnamed protein product [Huperzia lucidula] >gi|219795938|emb|CAW38437.1| unnamed protein product [Hu	MVREMIQTFCSVSEVSIRGAELTVAQVAAIARREGVSVCLDASAAKKRVDESSNWVMQNVMRGTDTYGVTTGFGATSHRRTNQGVELQQELIRFLNAGIIGVGADAGGNVLPSWATRAAMLVRTNTLMQGYSGIRWEILETLAKLLNARITPKVPLRGTITASGDLVPLSYIAGLITGRKNARAVVGVDREVAAEEAMKMVGVSQAFVLQPKEGLAMVNGTSVGAGVAAIVCYDANVLAVFAVVASALFCEVMQGKPEFSDPLTHKLKHHPGQIEAAPAMEYILQGSSYMKAAAKMHETDPLKKPKQDRYALRTSPQWLGPQIEVIRSATQSIQREINSVNDNPLIDVSRDLALHGGNFQGTPIGVSMDNLRLAIAAIGKLMFAQFSELVNDFYNNGLP…	145	82613	3	1
733	870	gi|219990041|emb|CAW82463.1|	unnamed protein product [Stellaria longipes] >gi|219795958|emb|CAW38447.1| unnamed protein product [Stellaria longipes] >gi|257294138|emb|CBC04319.1| unnamed protein product [Stellaria longipes] >gi|257635056|emb|CBC83347.1| unnamed protein product	MENGLCMNNDPLNWGKAASDVSGSHLEEVKKMVAEYRNKDVKLVGETLTVAQVAAVARSGVTVELCNAARDRVKASSDWVMDSMSKGTDSYGVTTGFGATSHRRTSKGGALQKELIRFLNAGVFGNGTENSHTLPHTASRAAMLVRINTLLQGYSGIRWEILEAITKLLNSDVTPCLPLRGTITASGDLVPLSYIAGLLTGRPNAKAVGPNGEVLTAEQAFKAAKIDSPFFELQPKEGLAMVNGTAVGSGMASIVLFEANILAVLAEVISAVFAEVMNGKPEFTDHLTHKLKHHPGQIEAAAIMEHILDGSSYMKAAKALHDMDPLQRPRQARYALRASPQWLGPQIGVIRWATKSIEREINSVNDNPLIDVSRNKAIHGGNFQGTPIGVSMDNTRLAI…	145	87904	3	1
733	870	gi|219990057|emb|CAW82471.1|	unnamed protein product [Daucus carota] >gi|28316386|dbj|BAC56977.1| phenylalanine ammonia-lyase [Daucus carota] >gi|257314254|emb|CBC40407.1| unnamed protein product [Daucus carota] >gi|257294154|emb|CBC04327.1| unnamed protein product [Daucus caro	MAYTNGHHENGNGVDLCMKKEDPLSWGVAAEALKGSHLEEVKRMVAEYRKPVVKLGGETLTISQVAAISARDDSGVKVELSEAARAGVKASSDWVMESMNKGTDSYGVTTGFGATSHRRTKQGGALQKELIRFLNAGIFGSGAEAGNNTLPHSATRAAMLVRINTLLQGYSGIRFEILEAITKFLNHNITPCLPLRGTITASGDLVPLSYIAGLLTGRPNSKAVGPTGVTLSPEEAFKLAGVEGGFFELQPKEGLALVNGTAVGSGMASMVLFEANILAVLAEVMSAIFAEVMQGKPEFTDHLTHKLKHHPGQIEAAAIMEHILDGSAYVKAAQKLHEMDPLQKPKQDRYALRTSPQWLGPQIEVIRSSTKMIEREINSVNDNPLIDVSRNKAIHGGNF…	145	91348	3	1
733	870	gi|219990117|emb|CAW82501.1|	unnamed protein product [Arabidopsis thaliana] >gi|219796034|emb|CAW38485.1| unnamed protein product [Arabidopsis thaliana] >gi|15231778|ref|NP_190894.1| PAL2; phenylalanine ammonia-lyase [Arabidopsis thaliana] >gi|6630746|emb|CAB64229.1| phenylalan	MDQIEAMLCGGGEKTKVAVTTKTLADPLNWGLAADQMKGSHLDEVKKMVEEYRRPVVNLGGETLTIGQVAAISTVGGSVKVELAETSRAGVKASSDWVMESMNKGTDSYGVTTGFGATSHRRTKNGTALQTELIRFLNAGIFGNTKETCHTLPQSATRAAMLVRVNTLLQGYSGIRFEILEAITSLLNHNISPSLPLRGTITASGDLVPLSYIAGLLTGRPNSKATGPDGESLTAKEAFEKAGISTGFFDLQPKEGLALVNGTAVGSGMASMVLFEANVQAVLAEVLSAIFAEVMSGKPEFTDHLTHRLKHHPGQIEAAAIMEHILDGSSYMKLAQKVHEMDPLQKPKQDRYALRTSPQWLGPQIEVIRQATKSIEREINSVNDNPLIDVSRNKAIHGG…	145	91462	3	1
733	870	gi|219990157|emb|CAW82521.1|	unnamed protein product [Helianthus annuus] >gi|257294254|emb|CBC04377.1| unnamed protein product [Helianthus annuus] >gi|257635172|emb|CBC83463.1| unnamed protein product [Helianthus annuus] >gi|219796074|emb|CAW38505.1| unnamed protein product [He	MENGTHVNGSANGFCIKDPLNWGVAAEALTGSHLDEVKKMVGEFRKPVVKLGGETLTVSQVAGISAAGDGNMVKVELSEAARAGVKASSDWVMESMNKGTDSYGVTTGFGATSHRRTKNGGALQKELIRFLNAGIFGNGTESSHTLPHSATRAAMLVRINTLLQGYSGIRFEILEAITKFLNNNITPCLPLRGTITASGDLVPLSYIAGLLTGRPNSKAVGPAGEVLNAESAFAQAGVEGGFFELQPKEGLALVNGTAVGSGMASMVLFEANVLALLSEVLSAIFAEVMQGKPEFTDHLTHKLKHHPGQIEAAAIMEYILDGSDYVKAAQKVHEMDPLQKPKQDRYALRTSPQWLGPQIEVIRSATKMIEREINSVNDNPLIDVSRNKALHGGNFQGTP…	145	83990	3	1
733	870	gi|222083661|gb|ACM41749.1|	phenylalanine ammonia-lyase [Phyllostachys parvifolia] >gi|222083599|gb|ACM41719.1| phenylalanine ammonia-lyase [Phyllostachys parvifolia]	MECENGHVAANGNGLCMATPRADPLNWGKAAEELMGCHLDEVKRMVTEYRQPVVKIEGASLRIAQVAAVAAAGKAKVELDESARERVKASSDWVMDSMMNGTDSYGVTTGFGATSHRRTKEGGALQRELIRFLNAGAFGTGSDGHVLSADATRAAMLVRINTLLQGYSGIRFEILEAITKLLNANVTPCLPLRGTVTASGDLVPLSYIAGLVTGRENSVAVAPDGTKVNAAEAFKIAGIQGGLFELQPKEGLAMVNGTAVGSGLASTVLFEANILAILDEVLSAVFCEVMNGKPEYTDHLTHKLKHHPGQIEAAAIMEHILEGSSYMKLAKKLGELDPLMKPKQDRYALRTSPQWLGPQIEVIRAATKSIEREINSVNDNPLIDVSRNKALHGGNFQGT…	145	89173	3	1
733	870	gi|222083663|gb|ACM41750.1|	phenylalanine ammonia-lyase [Phyllostachys dulcis] >gi|221267849|gb|ACM16588.1| phenylalanine ammonia-lyase [Phyllostachys dulcis]	MECENGHVAANGNGLCMATPRADPLNWGKAAEELMGSHLDEVKRMVTEYRQPVVKIEGASLRIAQVAAVAAAGKAKVELDESARERVKASSDWVMDSMMNGTDSYGVTTGFGATSHRRTKEGGALQRELIRFLNAGAFGTGSDGHVLSADATRAAMLVRINTLLQGYSGIRFEILEAITKLLNANVTPCLPLRGTVTASGDLVPLSYIAGLVTGRENSVAVAPDGTKVNAAEAFKIAGIQGGFFELQPKEGLAMVNGTAVGSGLASTVLLEANILAILVEVLSAVFCEVMNGKPEYTDHLTHKLKHHPGQIEAAAIMEHILEGSSYMKLAKKLGELDPLMKPKQDRYALRTSPQWLGPQIEVIRAATKSIEREINSVNDNPLIDVSRNKALHGGNFQST…	145	89112	3	1
733	870	gi|222138145|gb|ACM45575.1|	phenylalanine ammonia-lyase [Phyllostachys prominens] >gi|222138141|gb|ACM45573.1| phenylalanine ammonia-lyase [Phyllostachys prominens]	MECENGHVAANGNGLCMATPRADPLNWGKAAEELMGCHLDEVKRMVTEYRQPVVKIEGASLRIAQVAAVAAAGEAKVELDESARERVKASSDWVMNSMMNGTDSYGVTTGFGATSHRRTKEGGALQRELIRFLNAGAFGTGTDSHVLPAAATRAAMLVRINTLLQGYSGIRFEILEAIAKLLNANVTPCLPLRGTITASGDLVPLSYIAGLVTGRENSVAVTPDGRKVNAAEAFKIAGIQGGFFELQPKEGLAMVNGTAVGSGLASTVLFEANILAILAEVLSAVFCEVMNGKPEYTDHLTHKLKHHPGQIEAAAIMEHILEGSSYMKLAKKLGELDPLMKPKQDRYALRTSPQWLGPQIEVIRAATKSIEREINSVNDNPLIDVSRGKAIHGGNFQGT…	145	89094	3	1
733	870	gi|222138174|gb|ACM45589.1|	phenylalanine ammonia-lyase [Phyllostachys angusta] >gi|222138180|gb|ACM45592.1| phenylalanine ammonia-lyase [Phyllostachys angusta]	MECENGHPAANGNGLCMATPRADPLNWGKAAEELMGSHLDEVKRMVTEYRQPVVKIEGASLRIAQVAAVAAAGKAKVELDESARERVKASSDWVMDSMMNGTDSYGVTTGFGATSHRRTKEGGALQRELIRFLNAGAFGTGSDGHVLSADATRAAMLVRINTLLQGYSGIRFEILEAITKLLNANVTPCLPLRGTVTASGDLVPLSYIAGLVTGRENSVAVAPDGRKVNAAEAFKIAGIQGGFFELQPKEGLAMVNGTAVGSGLASTVLFEANILAILVEVLSAVFCEVMNGKPEYTDHLTHKLKHHPGQIEAAAIMEHILEGSSYMKLAKKLGELDPLMKPKQDRYALRTSPQRLGPQIEVIRAATKSIEREINSVNDNPLIDVSRNKALHGGNFQGT…	145	89065	3	1
[truncated: 3,471 more rows]

## Sheet: M.cordata
#	Visible?	Starred?	Identified Proteins (1031)	Accession Number	Molecular Weight	Protein Grouping Ambiguity	Quantitative Variance	Taxonomy	Quant 1	Quant 2	Quant 3	Quant 4	Quant 5	Quant 6	Quant 7	Quant 8
[truncated: 1,032 more rows]

[truncated: 1 more sheets: M.microcarpa]
