# Supplementary material for: Integration of Transcriptome, Proteome and Metabolism Data Reveals the Alkaloids Biosynthesis in Macleaya cordata and Macleaya microcarpa
Source: PLOS journal article supplement (doi:10.1371/journal.pone.0053409), 2013-01-09
Supplement: S6 (10.1371/journal.pone.0053409.s006) [file journal.pone.0053409.s006]

A

## ABC transporter unigene distribution

■ M.cordata ■ M.microcarpa

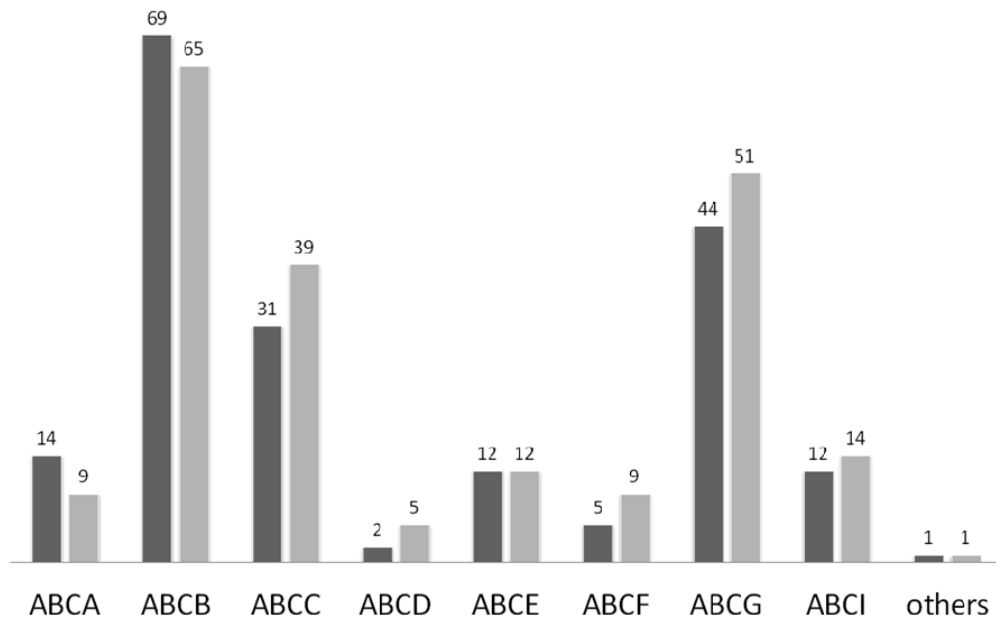

B

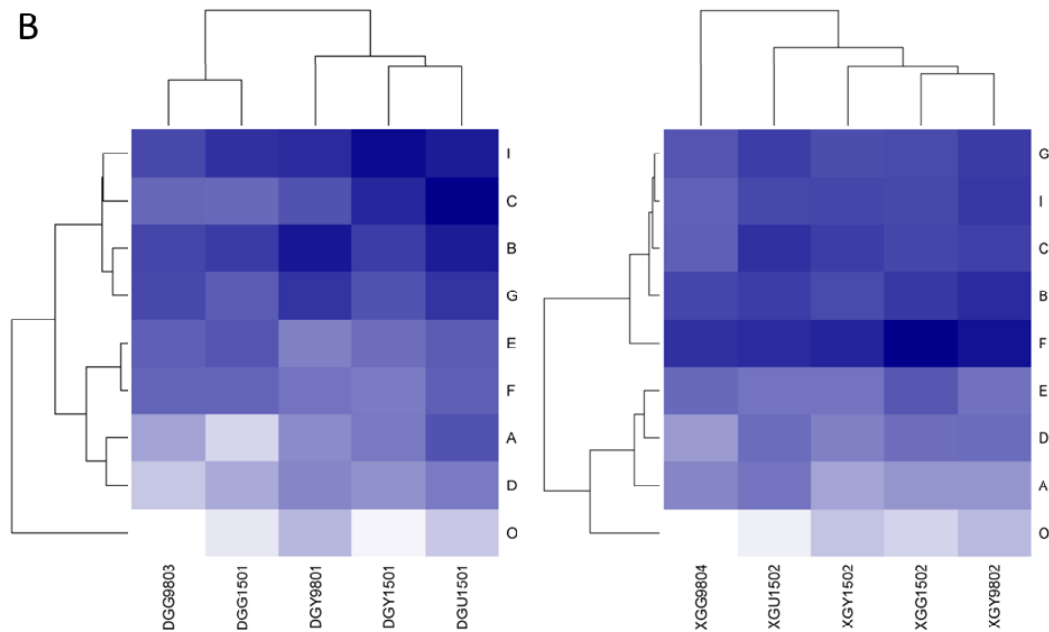

**Figure S6. ABC transporter gene family distribution and expression cluster.**
